# Supplementary material for: Bacteriological and Immunological Profiling of Meconium and Fecal Samples from Preterm Infants: A Two-Year Follow-Up Study
Source: Nutrients. 2017 Nov 27;9(12):1293. doi: 10.3390/nu9121293 (PMC5748744; doi:10.3390/nu9121293)
Supplement: Supplementary file 1 [file nutrients-09-01293-s001.xlsx]

## Sheet: Table S1
Table S1.L1 HITChip composition
New	i4_0d	i2_0d	i5_0d	i6_0d	i10_0d	i22_0d	i9_0d	i4_21d	i6_21d	i2_21d	i5_21d	i7_21d	i9_21d	i13_21d	i22_21d	i28_21d	Ave_21d	SD_21d	CI95%_21d		i2_730d	i4_730d	i5_730d	i6_730d	i7_730d	i9_730d	i10_730d	i13_730d	i15_730d	i18_730d	i21_730d	i22_730d	i28_730d	i29_730d	i30_730d	i31_730d
Actinobacteria	1.58735	2.60643	5.57216	14.8346	1.997	0.591091	4.71316	0.77336	21.4068	0.3435	13.8689	0.354309	0.272508	6.69607	0.303898	0.580731	4.78136	4.80895	2.35634		10.1616	7.67306	17.4973	17.0724	4.01758	1.59479	2.94307	9.72492	11.3661	2.0438	0.952031	26.1338	1.00163	28.55	7.60554	10.3731
Bacilli	21.5975	51.5072	48.9952	2.04836	65.1225	0.866332	44.6279	2.35441	1.49614	1.78543	2.68237	7.44472	22.7408	0.623958	1.62553	25.697	18.826	18.5633	9.09585		7.68323	8.05601	9.08625	11.763	14.845	7.02385	22.5755	6.44852	36.8626	10.1328	3.15918	5.51697	1.42761	3.56617	10.6826	2.45758
Bacteroidetes	2.26364	4.12705	2.06233	0.636954	4.41235	0.493356	26.7614	1.13478	0.674968	9.2139	0.494127	0.703853	0.669815	0.755408	0.664637	0.97543	3.50275	3.81296	1.86832		7.94808	5.338	2.45423	6.70684	15.4456	2.1707	5.41224	15.8289	1.74306	12.4441	16.1642	1.40772	7.79163	4.07322	8.27015	9.17126
Clostridium cluster I	0.475438	0.773808	0.450083	0.493976	1.16507	0.0990557	0.768775	8.4551	0.612335	0.160685	1.42999	0.162653	0.139878	0.149151	0.31476	0.200001	0.990672	1.00977	0.494777		0.848128	0.284662	0.467384	0.226486	4.47548	0.280018	0.729393	0.289183	0.510806	0.303418	0.398514	0.210284	1.96244	0.253353	0.843445	0.190206
Clostridium cluster IV	3.6884	6.41986	3.45457	1.00201	7.10353	0.867878	5.09491	1.98923	1.04563	1.30779	0.799663	1.39911	9.07209	1.2182	1.10502	1.98682	2.97217	2.12504	1.04125		16.5546	26.0354	22.2645	41.2125	41.0183	57.609	26.6453	10.4023	24.9022	20.5957	42.2767	7.00644	48.3193	16.6915	21.4288	11.0513
Clostridium cluster IX	0.58629	0.976773	0.547719	0.165528	1.16761	0.128072	0.859603	0.891146	0.179193	0.217374	12.9163	5.80193	0.202585	0.197139	0.188429	0.266824	1.58078	1.94459	0.952829		6.28525	3.91959	0.520357	0.378084	0.374517	0.677782	0.393138	2.94298	1.60699	3.71596	1.41324	0.345809	1.45831	0.658587	0.619991	0.338526
Clostridium cluster XI	0.487563	0.765875	0.445594	0.128762	1.07393	0.106396	0.737937	0.256365	0.271743	0.170088	1.09671	0.162048	0.152036	0.155369	0.146152	0.213313	0.398117	0.277363	0.135905		1.0609	0.965577	3.22313	0.314739	4.36421	1.71184	5.1281	0.389872	1.24652	1.84862	1.65378	0.264502	3.88544	0.723892	1.45905	1.82485
Clostridium cluster XIII	0.0832932	0.138661	0.076438	0.0232201	0.168028	0.0181897	0.125211	0.0436726	0.0244536	0.0297343	0.0177281	0.0262053	0.0253442	0.0279194	0.0252883	0.0370646	0.0556532	0.0391705	0.0191932		0.0276443	0.0328575	0.0442827	0.0404595	0.0443366	0.0320916	0.0395881	0.0477575	0.0332064	0.0471911	0.0452631	0.0399994	0.0295605	0.0471367	0.0525021	0.0252899
Clostridium cluster XIVa	4.84992	10.9375	4.45788	1.36641	9.66911	1.07196	7.56914	24.681	1.35948	1.65624	1.04492	1.48785	2.12483	1.55951	1.41192	2.13568	4.83646	4.19055	2.05333		46.266	44.555	40.8107	17.7699	10.7592	25.467	33.411	50.2652	18.2313	45.4298	29.9931	56.3104	11.3498	25.8965	44.0202	62.7264
Fusobacteria	3.02038	0.256455	0.14406	0.041806	0.389404	0.0332311	0.248608	0.0779256	0.0442308	0.0534885	0.0315598	0.0470876	0.047631	0.0508983	0.0459383	0.0673353	0.287503	0.354348	0.173627		0.0518031	0.058712	0.0802369	0.0744981	0.0802176	0.0600134	0.0722242	0.0853442	0.0670241	0.0877172	0.0830002	0.0747163	0.0510354	0.0818774	0.0965654	0.0458287
Proteobacteria	57.9269	14.8282	31.6144	78.6159	3.76633	95.2295	4.95188	58.1541	72.29	84.3123	65.1645	81.7553	63.619	87.859	93.5456	66.9165	60.0343	23.6205	11.5738		1.06838	1.25747	1.29379	1.82994	1.20977	0.77722	0.924237	1.40686	1.23095	1.16026	2.35828	1.20479	10.491	11.513	2.04153	0.671084
Uncultured Clostridiales	0.962022	1.58263	0.87141	0.275049	1.89096	0.26538	1.3437	0.504302	0.29367	0.383797	0.227231	0.322578	0.318215	0.368372	0.312526	0.447144	0.648062	0.426302	0.208884		0.737314	0.383471	0.51967	0.491528	2.28642	1.86757	0.534549	0.547378	0.568841	0.547195	0.533061	0.471841	5.89167	7.03969	0.800745	0.295822
Uncultured Mollicutes	1.50674	0.399169	0.229492	0.06637	0.481814	0.0521853	0.337716	0.12589	0.0692474	0.08369	0.0505753	0.073564	0.0718061	0.0789214	0.0712245	0.103412	0.237613	0.221873	0.108716		0.100386	0.0966106	0.127214	0.116552	0.221882	0.0954925	0.108831	0.132392	0.0929572	0.140285	0.136645	0.11453	3.2643	0.13012	0.15245	0.0742327
Verrucomicrobia	0.184133	3.39448	0.240687	0.0980057	0.110618	0.0169519	0.807531	0.173519	0.0193631	0.0199842	0.0171664	0.0159697	0.278156	0.0190743	0.0164758	0.0238908	0.33975	0.440314	0.21575		0.426239	0.426275	0.532265	1.54794	0.280726	0.17506	0.587067	0.782594	0.889927	0.208574	0.394172	0.38219	2.39287	0.150653	0.634633	0.187788

## Sheet: Table S2
Table S2. L2 HITChip composition
New	i2_0d	i4_0d	i5_0d	i6_0d	i9_0d	i10_0d	i22_0d	i2_21d	i4_21d	i5_21d	i6_21d	i7_21d	i9_21d	i13_21d	i22_21d	i28_21d	i2_730d	i4_730d	i5_730d	i6_730d	i7_730d	i9_730d	i10_730d	i13_730d	i15_730d	i18_730d	i21_730d	i22_730d	i28_730d	i29_730d	i30_730d	i31_730d
Actinomycetaceae	0.0593514	0.03577	0.0304153	0.00993237	0.0502528	0.0703519	0.00791915	0.0120154	0.0172619	0.00811253	0.0111786	0.0108076	0.0102209	0.0117627	0.0099955	0.0150459	0.0148618	0.0141661	0.020904	0.017777	0.019529	0.0175589	0.0164794	0.0199867	0.0584366	0.0239263	0.0184095	0.020233	0.0112431	0.0193397	0.0229326	0.0112106
Aerococcus	0.0381592	0.0471453	0.0378816	0.00690722	0.325554	0.684348	0.00482676	0.0144853	0.013982	0.00812465	0.0085582	0.0177673	0.0248852	0.00768183	0.0112899	0.0236007	0.00615263	0.00680349	0.00951494	0.00992624	0.00886206	0.00723142	0.00837387	0.0100045	0.0080962	0.01044	0.0102801	0.00876424	0.006063	0.0106823	0.0116802	0.00630182
Aeromonas	0.0302749	0.0194245	0.0232272	0.00678636	0.028206	0.036556	0.00494014	0.00638157	0.00941913	0.0039571	0.00545208	0.00579329	0.00556858	0.0064452	0.00552308	0.00790585	0.00714737	0.0090046	0.0122237	0.00840579	0.00914723	0.00661433	0.00790362	0.00966017	0.00774501	0.0137655	0.00955939	0.00971816	0.00886854	0.00945554	0.0139132	0.00582902
Akkermansia	3.39448	0.184133	0.240687	0.0980057	0.807531	0.110618	0.0169519	0.0199842	0.173519	0.0171664	0.0193631	0.0159697	0.278156	0.0190743	0.0164758	0.0238908	0.426239	0.426275	0.532265	1.54794	0.280726	0.17506	0.587067	0.782594	0.889927	0.208574	0.394172	0.38219	2.39287	0.150653	0.634633	0.187788
Alcaligenes faecalis et rel.	0.15895	0.119889	0.0762588	0.0335001	0.158892	0.13684	0.0155447	0.0239798	0.0345948	0.0143821	0.0202377	0.0208778	0.0205036	0.022655	0.020559	0.0300265	0.0226044	0.0260905	0.0339888	0.033904	0.0352604	0.0254786	0.0295452	0.0367766	0.02574	0.0374259	0.0377466	0.0327903	0.142971	0.0364132	0.0437764	0.0198347
Allistipes et rel.	0.548889	0.281924	0.255962	0.0750355	0.623327	0.514571	0.0596353	0.127385	0.135101	0.0581162	0.079989	0.0813914	0.0793745	0.0901398	0.0791218	0.114605	0.249858	0.151833	0.171602	0.289124	1.04522	0.158402	0.132518	0.297578	0.134323	0.433622	0.367567	0.166725	1.7554	0.228639	0.366144	0.1567
Anaerobiospirillum	0.0345623	0.0208806	0.0180084	0.00687712	0.026142	0.0331858	0.00411067	0.0241408	0.0254906	0.0100471	0.0108306	0.00815386	0.00883313	0.0130616	0.0158746	0.00752947	0.00552726	0.00663729	0.00849132	0.00802263	0.00871032	0.00608881	0.00732784	0.00922282	0.00647228	0.00937349	0.00906385	0.00828432	0.00684851	0.0124315	0.0101848	0.00500402
Anaerofustis	0.0339542	0.0259812	0.029301	0.00527589	0.0284991	0.0367405	0.00390485	0.00969744	0.0167819	0.00618444	0.00667158	0.0116843	0.0090184	0.00653397	0.00811761	0.0181804	0.0102193	0.0134133	0.0182858	0.0130641	0.0150193	0.0118991	0.0158189	0.0150718	0.0123053	0.0170902	0.0173191	0.0126851	0.00908901	0.0119191	0.0160805	0.00950301
Anaerostipes caccae et rel.	0.294353	0.206447	0.169982	0.0527124	0.294519	0.442052	0.0581683	0.0744479	0.218423	0.0513713	0.0591287	0.0691406	0.073582	0.0744877	0.0628819	0.101872	6.02446	4.80469	3.39661	0.788487	0.348856	0.756929	2.84158	15.7524	1.4177	6.66456	2.1086	4.18384	0.72523	4.37466	3.19405	5.63653
Anaerotruncus colihominis et rel.	0.495361	0.225328	0.216508	0.0645963	0.307886	0.437076	0.0568985	0.0784219	0.195968	0.0557069	0.0662175	0.0709703	0.0711804	0.0758138	0.0677122	0.0984595	0.123568	0.0971071	0.121987	0.118114	0.362029	0.111923	0.138154	0.165042	0.0971412	0.160499	0.314129	0.109246	0.672248	0.20339	0.191876	0.0981516
Anaerovorax odorimutans et rel.	0.25528	0.161998	0.140125	0.0425578	0.222517	0.322155	0.0345569	0.0543705	0.080244	0.0330026	0.0447548	0.0491015	0.047555	0.0510317	0.0462806	0.0689277	0.0956542	0.114137	0.739501	0.11449	0.73644	0.847693	0.796107	0.132349	0.139666	0.330282	0.678582	0.0887118	0.647284	0.463933	0.192114	0.465894
Aneurinibacillus	0.0282995	0.018005	0.0152963	0.00476404	0.0240278	0.0342679	0.00379221	0.00599639	0.00875892	0.00362303	0.00501485	0.00528518	0.00522102	0.0056858	0.00518082	0.00742985	0.0106251	0.00805626	0.0125713	0.0103206	0.0137282	0.00939723	0.0102864	0.0116826	0.00778794	0.013794	0.0111233	0.00963381	0.00739385	0.0105817	0.01574	0.00728084
Aquabacterium	0.209563	0.159255	0.585139	0.0329244	0.117321	0.0435046	0.00569615	0.00646403	0.00973211	0.00397536	0.00815974	0.00562452	0.00527149	0.00832166	0.00549455	0.00783594	0.0131831	0.00741496	0.00971566	0.0107848	0.0196359	0.00775136	0.00850842	0.0107265	0.00678031	0.0101452	0.00979465	0.00902479	0.0209728	0.0101932	0.0112117	0.00611041
Asteroleplasma et rel.	0.0328033	0.0170267	0.0154098	0.00480621	0.0243675	0.0326887	0.00414294	0.00618889	0.00928609	0.00381192	0.00521649	0.00554478	0.0052518	0.00606552	0.0053903	0.00781257	0.00569737	0.00662372	0.00922776	0.00840545	0.00874993	0.00617575	0.0075098	0.00925467	0.00645236	0.00945077	0.00915949	0.00812593	0.00607426	0.0089972	0.0103793	0.00496646
Atopobium	0.056203	0.0331246	0.0301052	0.00939983	0.0673884	0.0668075	0.0074201	0.0118941	0.0170942	0.00694831	0.00978071	0.0103454	0.0101467	0.0113009	0.0100386	0.0150092	0.0115439	0.0135798	0.0189326	0.0164862	0.0176137	0.0134346	0.015246	0.0191993	0.0145631	0.0200697	0.0183476	0.0180207	0.0121301	0.0226755	0.0246185	0.0126134
Bacillus	1.83082	0.117698	0.108658	0.0230082	0.254787	0.373773	0.0169992	0.0268638	0.0359131	0.0172558	0.0187757	0.0311419	0.0281129	0.0190915	0.0211093	0.0576563	0.0202263	0.0226689	0.0352678	0.0274844	0.031667	0.0227364	0.0277667	0.0309312	0.0224483	0.0360655	0.0293896	0.027432	0.0206682	0.0341565	0.0356831	0.0190816
Bacteroides fragilis et rel.	0.314709	0.187843	0.170048	0.0551591	0.335985	0.374232	0.0428213	7.17108	0.101295	0.0446399	0.0607029	0.0719006	0.0619967	0.0672705	0.0579906	0.0834944	0.369368	0.141524	0.676657	1.77906	1.27253	0.145789	0.0949189	0.53182	0.149991	0.428657	6.99138	0.19055	1.71595	2.15993	0.496925	0.995927
Bacteroides intestinalis et rel.	0.0306217	0.0169127	0.0154387	0.00481523	0.0313697	0.0336229	0.00370821	0.00744112	0.00855561	0.00359363	0.00513946	0.0051973	0.00503596	0.00562333	0.00500964	0.00744064	0.0211707	0.0174237	0.0112426	0.0149819	0.0329877	0.0168383	0.0111742	0.113439	0.0124319	0.0277356	0.0296414	0.00986486	0.0108823	0.0097145	0.0223079	0.0414487
Bacteroides ovatus et rel.	0.255945	0.15244	0.139427	0.0464635	0.356767	0.301342	0.0340316	0.074508	0.0795931	0.0380269	0.0508964	0.0493253	0.0467137	0.0547482	0.0463716	0.0688778	0.139	0.134856	0.104506	0.149328	1.03913	0.128086	0.0795316	0.294178	0.125459	0.150952	2.75128	0.130001	0.101637	0.0959607	0.350526	0.275707
Bacteroides plebeius et rel.	0.175289	0.103822	0.0931297	0.028843	0.206594	0.202323	0.0225172	0.0449399	0.0524043	0.0219024	0.0305017	0.0313694	0.0307271	0.0345033	0.0306973	0.0449702	0.108766	0.1124	0.0631411	0.0738045	0.283792	0.0549526	0.0590187	0.267277	0.0553729	0.108049	0.265283	0.0617762	0.0874612	0.061545	0.104631	0.084602
Bacteroides splachnicus et rel.	0.439996	0.262882	0.233039	0.0780503	0.441127	0.505889	0.0585267	0.0994643	0.140892	0.0641592	0.0862595	0.0827727	0.079449	0.0962383	0.0800375	0.115727	0.131113	0.128906	0.154308	0.163001	0.342629	0.120121	0.123554	0.220129	0.120204	0.195161	0.29316	0.147916	1.37176	0.159864	0.218665	0.203998
Bacteroides stercoris et rel.	0.174312	0.101138	0.0918058	0.0280649	0.23342	0.201622	0.0220249	0.0471548	0.0512388	0.0215341	0.0299443	0.0313185	0.0305465	0.0339233	0.0301639	0.0439478	0.0765278	0.0783586	0.0586541	0.0613068	0.141424	0.0472016	0.0518502	0.474583	0.0453106	0.0793049	0.22381	0.0538454	0.0446426	0.0610445	0.0807515	0.107316
Bacteroides uniformis et rel.	0.0578299	0.034538	0.0317933	0.00949439	0.0829884	0.0670145	0.00746561	1.1758	0.018451	0.00752392	0.0101681	0.014738	0.0122421	0.0114137	0.0103305	0.0148033	0.307883	0.250243	0.171997	0.358891	0.768697	0.043939	0.0268339	0.893041	0.0338511	0.107432	2.34426	0.0519949	0.36707	0.617777	0.158256	0.351893
Bacteroides vulgatus et rel.	0.387453	0.219893	0.199546	0.0626331	0.811326	0.448207	0.0476522	0.115255	0.111737	0.0473696	0.0664004	0.0670226	0.065718	0.0738147	0.0656315	0.0979983	5.84501	3.83063	0.485352	2.91046	9.01155	0.796107	0.382979	1.55116	0.638476	9.95977	0.805918	0.142355	1.81356	0.185114	5.50448	6.06533
Bifidobacterium	0.820165	0.763123	1.11883	14.6189	1.04514	0.801546	0.112704	0.176909	0.534178	13.4963	21.2778	0.179724	0.13228	6.55478	0.169419	0.243562	9.73962	7.09453	16.7724	16.6742	3.69036	1.34172	2.66741	9.33203	10.7766	1.6388	0.712665	25.6652	0.723643	28.2674	7.05543	9.88406
Bilophila et rel.	0.0900845	0.0576282	0.0535576	0.0152552	0.0767959	0.10166	0.0114893	0.0184267	0.0268474	0.0112498	0.0153076	0.0166004	0.0154269	0.0176076	0.0155815	0.023257	0.0200857	0.0218286	0.0298442	0.0265213	0.0315632	0.0218093	0.0245076	0.0306756	0.0201881	0.0290601	0.0273429	0.0249807	0.0173389	0.0268893	0.032269	0.0175835
Brachyspira	0.0555557	0.032905	0.0301568	0.00924693	0.0461965	0.0659804	0.00734982	0.0117908	0.016977	0.0069359	0.00970041	0.0103062	0.0100025	0.011082	0.0102614	0.0146274	0.0108205	0.0122912	0.0166162	0.0155833	0.0177395	0.0124161	0.0143729	0.0180138	0.0127485	0.0190315	0.0182171	0.0157227	0.0108916	0.0169795	0.0203882	0.00984512
Bryantella formatexigens et rel.	0.51827	0.316257	0.296175	0.0853844	0.45584	0.615848	0.0712363	0.111399	0.194692	0.0681438	0.0901296	0.101399	0.390655	0.102868	0.0938209	0.143926	1.57281	1.08355	0.487958	0.465579	0.472993	0.694997	0.753254	0.496011	0.619588	0.737952	0.308144	0.604155	0.164022	0.583149	0.482696	1.58743
Bulleidia moorei et rel.	0.119184	0.104729	0.0935472	0.0192043	0.100056	0.138888	0.0153568	0.0249878	0.0368275	0.0149834	0.0203557	0.0237635	0.0273784	0.0233207	0.0211469	0.0345358	0.0253489	0.0294865	0.0400777	0.0439049	0.041151	0.0288915	0.0396906	0.0420264	0.0387089	0.0432785	0.0395061	0.0349367	0.0229971	0.0400965	0.0594894	0.0223943
Burkholderia	0.26638	0.208446	0.499491	0.0394578	0.194661	0.0570059	0.0114552	0.00732138	0.0134859	0.00759681	0.012105	0.00730734	0.00700967	0.0123585	0.00621508	0.00906366	0.0435018	0.0117316	0.0538669	0.070508	0.05882	0.0131427	0.0204057	0.0146183	0.0116004	0.021375	0.018387	0.0199433	1.19938	0.030945	0.0150914	0.0069475
Butyrivibrio crossotus et rel.	3.83731	0.458706	0.490812	0.171382	1.21299	0.654311	0.0783512	0.117705	0.313489	0.0732357	0.0966606	0.101074	0.372859	0.109401	0.0992243	0.145261	2.00142	1.68877	1.61755	2.6151	0.749158	1.23362	0.896857	1.41996	1.54988	1.33165	2.07587	1.31514	1.08441	0.610495	1.77563	0.62826
Campylobacter	0.220694	0.136278	0.1211	0.0371184	0.188652	0.265004	0.0293653	0.047235	0.0687227	0.0280929	0.0390547	0.0412582	0.0400667	0.0448224	0.0402544	0.0586779	0.043851	0.0489137	0.0678077	0.0628326	0.0678889	0.0491982	0.0587442	0.0722758	0.0518773	0.0756338	0.0723683	0.0641866	0.0436083	0.0698151	0.0832087	0.0393404
Catenibacterium mitsuokai et rel.	0.0629798	0.0339977	0.0323233	0.009369	0.0471706	0.065895	0.00741595	0.01195	0.0175211	0.0075494	0.0098328	0.0111744	0.0103426	0.0110532	0.0100564	0.0153398	0.0166229	0.0153092	0.0192391	0.0171682	0.0186608	0.0733024	0.0156495	0.0278135	0.0178926	0.0199671	0.0183647	0.016005	0.0140795	0.0235337	0.0247169	0.0192081
Clostridia	0.773808	0.475438	0.450083	0.493976	0.768775	1.16507	0.0990557	0.160685	8.4551	1.42999	0.612335	0.162653	0.139878	0.149151	0.31476	0.200001	0.848128	0.284662	0.467384	0.226486	4.47548	0.280018	0.729393	0.289183	0.510806	0.303418	0.398514	0.210284	1.96244	0.253353	0.843445	0.190206
Clostridium cellulosi et rel.	0.621313	0.36112	0.336673	0.101551	0.524501	0.755018	0.0865691	0.134097	0.203538	0.0806131	0.106383	0.125628	0.12116	0.125026	0.113113	0.178196	1.70531	0.725146	3.11985	5.19693	7.67579	10.1434	1.69722	0.360461	1.27259	0.369662	0.236371	0.293002	17.3317	0.362204	1.63999	3.78788
Clostridium colinum et rel.	0.250884	0.152832	0.136063	0.0417585	0.219904	0.321261	0.0330276	0.0538439	0.0770637	0.0320094	0.0439306	0.0470594	0.0472923	0.0503551	0.0462221	0.0663513	0.0894095	0.0726162	0.0881112	0.0821767	0.12678	0.784286	0.0818812	0.114653	0.0647875	0.0977392	0.207602	0.0809405	0.125009	0.0847673	0.131439	0.0540077
Clostridium difficile et rel.	0.454359	0.291056	0.274538	0.0767199	0.466362	0.682327	0.0643727	0.1037	0.157568	1.05581	0.216922	0.10224	0.094246	0.0931258	0.0894977	0.12943	0.950954	0.836593	2.45531	0.18355	3.6047	0.848839	4.31275	0.237744	1.09222	1.49675	0.955627	0.159179	3.2235	0.241948	1.24369	1.34593
Clostridium felsineum et rel.	0.028375	0.0170732	0.0155061	0.00480145	0.0250041	0.0359461	0.00375722	0.00597411	0.00963697	0.00410881	0.00512383	0.00539652	0.00513993	0.00556941	0.00522346	0.00736719	0.00756932	0.00752524	0.0101765	0.00845177	0.0121211	0.00819491	0.00926294	0.00975823	0.00729434	0.00999257	0.00949137	0.00818357	0.00738832	0.0092673	0.0112414	0.00513525
Clostridium leptum et rel.	0.550268	0.350476	0.297351	0.0792649	0.381312	0.489483	0.106536	0.11794	0.19977	0.080077	0.0812073	0.339173	0.119233	0.109007	0.099229	0.497104	0.515417	0.458109	2.19621	10.4495	1.3714	1.93102	0.264379	0.560481	1.7381	0.401895	0.277512	0.305025	7.29535	2.36173	4.02978	0.348357
Clostridium nexile et rel.	0.222759	0.134271	0.12253	0.0379997	0.193036	0.269017	0.030443	0.048209	2.07081	0.0323293	0.0398255	0.041963	0.041608	0.045826	0.0411141	0.0616816	1.17565	0.799947	1.25268	0.857693	0.656538	1.04719	0.293176	0.797905	0.965915	0.301823	0.274467	3.87427	0.176793	0.610941	3.2742	1.10556
Clostridium orbiscindens et rel.	0.813872	0.477322	0.536129	0.125915	0.671984	0.896933	0.102603	0.164043	0.2388	0.0950938	0.130287	0.142581	7.99003	0.148628	0.137164	0.203488	4.32392	2.83164	8.13725	8.51751	7.87605	4.6025	10.7528	3.53973	13.6038	5.87716	2.72153	2.70289	2.26926	1.26689	7.20902	3.2687
Clostridium ramosum et rel.	0.143706	0.0847319	0.081125	0.0235859	0.121558	0.164302	0.0186721	0.0301911	0.043016	0.0180119	0.02444	0.0272327	0.0261312	0.028112	0.0256172	0.0389835	0.0627264	0.0518023	0.0642733	0.0473031	0.0480751	0.0385783	0.0830372	0.106293	0.0590915	0.0515241	0.0643653	0.060349	0.0391069	0.142294	0.12291	0.0892208
Clostridium sphenoides et rel.	0.531196	0.325408	0.28822	0.0889549	0.451619	0.637821	0.0749354	0.113436	0.208768	0.068247	0.0936168	0.102374	0.107858	0.10692	0.0973733	0.143705	0.76716	2.18522	0.644777	0.522152	0.420031	0.61087	0.369381	0.637491	0.849203	1.42716	0.687418	0.96198	0.160799	0.308965	2.13051	0.985917
Clostridium stercorarium et rel.	0.153196	0.0978405	0.147692	0.027557	0.131185	0.186051	0.0202366	0.0309594	0.0456235	0.0193482	0.0257304	0.0282198	0.0270525	0.02929	0.0262279	0.0398345	0.318943	0.575347	0.612695	0.0749848	0.0904996	0.092518	0.0743948	0.107133	0.24985	0.907268	0.0574907	0.171942	0.40559	0.0642499	0.595812	0.0851723
Clostridium symbiosum et rel.	0.895284	0.561601	0.500061	0.151058	0.845909	1.23313	0.125997	0.194144	0.59924	0.121359	0.160145	0.172342	0.175378	0.185165	0.164971	0.243812	1.6533	3.20708	2.1554	2.04722	1.36943	2.25827	0.928841	1.4352	0.566367	2.44674	3.67483	2.23847	0.348179	1.30329	1.45254	1.91571
Clostridium thermocellum et rel.	0.0276193	0.0164038	0.0150458	0.00479519	0.0236654	0.0333488	0.00368977	0.00590559	0.0088038	0.00365966	0.0049491	0.00521112	0.00505936	0.00563392	0.00508972	0.00761448	0.0059074	0.00652716	0.00901458	0.00868957	0.009015	0.00649145	0.00793114	0.00977396	0.0065813	0.00959788	0.0103853	0.00821905	0.00553284	0.00902081	0.01062	0.00500819
Collinsella	0.15525	0.0982263	0.113452	0.0281604	0.43556	0.190799	0.0230938	0.0420103	0.0518646	0.0223904	0.0286582	0.0440538	0.0291964	0.0337219	0.0293017	0.0513142	0.254115	0.433678	0.550141	0.219911	0.155713	0.118229	0.113162	0.194354	0.408706	0.219411	0.0583153	0.300273	0.164958	0.0966333	0.341104	0.373189
Coprobacillus catenaformis et rel.	0.141807	0.083248	0.0764137	0.0240596	0.11741	0.166087	0.0182425	0.0296568	0.0428001	0.0184243	0.0261223	0.026556	0.0254672	0.0286225	0.0252488	0.0378146	0.124308	0.0842128	0.079339	0.057478	0.050986	0.0341987	0.0396805	0.182439	0.0819963	0.0486444	0.0483255	0.0458661	0.0610762	0.104103	0.0914793	0.159292
Coprococcus eutactus et rel.	0.364453	0.225076	0.205074	0.0609271	0.348911	0.524729	0.0480902	0.0774333	0.119588	0.0458951	0.0635253	0.068127	0.0766961	0.0724995	0.0659669	0.0977629	6.19302	7.08228	2.62681	1.52849	0.296978	3.31808	5.76398	10.193	2.92212	8.5548	2.3901	15.8966	1.29122	0.389829	2.47669	8.43125
Corynebacterium	0.0871251	0.0529533	0.0527891	0.0151062	0.0899369	0.102138	0.0123627	0.0186915	0.0299723	0.028916	0.0165982	0.0193783	0.0152416	0.0178406	0.017208	0.0369273	0.0178246	0.018976	0.0278764	0.025461	0.027706	0.0193614	0.0229764	0.02829	0.0219882	0.029855	0.0276829	0.0269887	0.0186039	0.0281394	0.0313377	0.016088
Desulfovibrio et rel.	0.139813	0.0879004	0.0768169	0.0240396	0.125783	0.169604	0.0244788	0.0402189	0.0490096	0.0259586	0.0269884	0.0304246	0.0278471	0.0432305	0.0298528	0.0377229	0.0306495	0.0359253	0.0464019	0.0427248	0.0457607	0.0345065	0.0393396	0.0501745	0.0793157	0.0494966	0.0473758	0.0420338	0.0289623	0.12694	0.0533682	0.0497444
Dialister	0.167083	0.102296	0.0920775	0.0281446	0.14061	0.197131	0.0221024	0.0366262	0.14651	0.026685	0.0307513	0.0370196	0.0315639	0.034424	0.0322279	0.0450779	5.97105	0.0571178	0.0558726	0.0503115	0.0705568	0.0471912	0.0833189	0.0769125	0.0634982	3.16261	0.980026	0.0492284	0.883697	0.370547	0.0618685	0.0607784
Dorea formicigenerans et rel.	0.587786	0.362455	0.322118	0.101621	0.517126	0.726275	0.0863929	0.129257	0.450997	0.0798938	0.105018	0.115698	0.14132	0.122173	0.110581	0.162338	1.05589	2.29996	3.28744	1.96605	1.00973	2.60672	3.3597	3.56208	1.69249	1.96574	4.13902	4.29589	0.535517	1.1376	2.52826	6.68502
Eggerthella lenta et rel.	0.175149	0.111807	0.101506	0.0308365	0.175914	0.221092	0.0258554	0.0402191	0.05665	0.0257535	0.0336106	0.0362919	0.0329366	0.0385398	0.0329812	0.0487597	0.0537466	0.070135	0.0706514	0.0579564	0.0669035	0.0573586	0.0746066	0.0909299	0.0560335	0.0673317	0.077499	0.0690647	0.043204	0.0784	0.0849001	0.0532188
Enterobacter aerogenes et rel.	0.919961	14.1266	2.81428	17.5505	0.677541	0.372709	26.7474	0.918947	14.0416	5.24171	6.57627	33.2312	20.487	10.9205	16.5762	25.396	0.0926375	0.107585	0.129908	0.143747	0.0925302	0.0742116	0.0947291	0.131384	0.228591	0.130632	0.0952256	0.183249	0.944987	0.474311	0.375624	0.0931072
Enterococcus	0.474342	11.3541	0.392794	0.15975	3.35328	4.29298	0.0439769	0.442259	1.48094	1.92414	0.904757	3.64596	0.617809	0.144215	0.479012	21.787	0.0487763	0.0608195	0.0732167	0.06459	0.0848667	0.0920945	0.0757787	0.0769405	0.12385	0.0823817	0.0929293	0.132199	0.049297	0.332792	0.0779729	0.075482
Escherichia coli et rel.	5.05036	18.6778	12.1443	24.6345	0.76921	0.519613	23.9074	72.6284	30.802	41.0212	41.3022	15.7142	15.2023	56.0537	42.6821	18.1678	0.100118	0.311304	0.227451	0.341726	0.187708	0.085575	0.116681	0.198924	0.152428	0.148549	0.143213	0.16378	1.68593	8.84188	0.276615	0.0770401
Eubacterium biforme et rel.	0.15477	0.0923791	0.134577	0.0232405	0.123669	0.170659	0.0187086	0.0309898	0.0509293	0.0179471	0.0243824	0.0275347	0.0582647	0.0282655	0.0265947	0.0408922	0.109186	0.0474611	0.0608853	0.0713016	0.148528	0.077365	0.106514	0.0529409	0.0815519	0.0581489	0.0508277	0.0472653	0.0300569	0.0463286	0.107145	0.0301368
Eubacterium cylindroides et rel.	0.138718	0.0823791	0.0755231	0.0231937	0.117373	0.167744	0.018457	0.0299233	0.043001	0.0176412	0.0243657	0.0261517	0.0258066	0.0281059	0.0255984	0.0368157	0.0416081	0.0340024	0.0785411	0.0438391	0.0687121	0.0309146	0.0405692	0.0739292	0.0367256	0.0486098	0.0493229	0.0402996	0.0427459	0.100855	0.0668015	0.031428
Eubacterium hallii et rel.	0.129724	0.081432	0.0822432	0.0197519	0.107553	0.149269	0.016131	0.0313117	0.128342	0.0205984	0.0225892	0.0360125	0.0345756	0.0240594	0.026184	0.0587884	2.92993	1.4647	4.52588	0.348566	0.357589	2.26212	4.9115	2.21629	1.03078	4.57318	0.538102	2.24995	0.295932	4.11222	0.382405	3.43547
Eubacterium limosum et rel.	0.138585	0.0599987	0.061648	0.0150429	0.0977728	0.15248	0.0133196	0.0220391	0.028283	0.0133698	0.0162885	0.0234206	0.0203174	0.018025	0.0183075	0.0339142	0.0332296	0.0224134	0.0445039	0.0289563	0.0336856	0.025873	0.0284532	0.0342801	0.0239383	0.0332967	0.0290706	0.0303355	0.0190427	0.0299089	0.131306	0.0859023
Eubacterium rectale et rel.	0.257692	0.163802	0.150474	0.0425594	0.226261	0.317155	0.0341574	0.0538471	0.135615	0.0330167	0.0446473	0.0471743	0.0536836	0.0509884	0.0456431	0.0696358	0.642788	1.27643	0.258737	0.653331	0.169587	0.196411	0.200263	0.446024	0.390646	1.05193	0.166894	0.322357	0.143007	0.209641	0.266825	0.336523
Eubacterium siraeum et rel.	0.128008	0.0677766	0.0741081	0.0192408	0.0987278	0.138803	0.0146524	0.0237771	0.0346491	0.014714	0.0203466	0.0214865	0.0217949	0.0225013	0.0202834	0.0302717	0.0581687	0.027778	0.0352196	0.0339179	0.0422866	0.0353113	0.0429864	0.0928468	0.0311455	0.0391759	0.0435815	0.032514	0.0344482	0.0360143	0.0461607	0.0211263
Eubacterium ventriosum et rel.	0.167689	0.102883	0.0920323	0.0285336	0.144482	0.205625	0.0240852	0.0363267	0.15096	0.0231573	0.0301144	0.0322281	0.0315484	0.0345974	0.031065	0.0458838	1.01438	0.289796	0.169834	0.886198	0.158263	0.263197	0.106916	0.1302	0.129693	0.5824	0.140884	0.123178	0.0796077	0.106414	0.150896	0.102422
Faecalibacterium prausnitzii et rel.	0.824643	0.48982	0.446658	0.136121	0.736007	1.04098	0.107659	0.175738	0.251188	0.104386	0.143582	0.154515	0.174083	0.165874	0.1488	0.220038	4.87385	16.2141	2.93159	1.50055	3.25581	2.49078	7.49807	1.75302	1.60927	6.72102	24.659	0.670009	3.27976	0.41832	1.44074	0.930916
Fusobacteria	0.256455	3.02038	0.14406	0.041806	0.248608	0.389404	0.0332311	0.0534885	0.0779256	0.0315598	0.0442308	0.0470876	0.047631	0.0508983	0.0459383	0.0673353	0.0518031	0.058712	0.0802369	0.0744981	0.0802176	0.0600134	0.0722242	0.0853442	0.0670241	0.0877172	0.0830002	0.0747163	0.0510354	0.0818774	0.0965654	0.0458287
Gemella	0.0290106	0.016675	0.019481	0.00487539	0.0261748	0.0337823	0.00369208	0.00592784	0.00858522	0.00349388	0.00486406	0.00513262	0.00501646	0.00556692	0.00508352	0.00733936	0.0100744	0.00754364	0.0108422	0.0133873	0.0130487	0.00692177	0.00813228	0.0120544	0.00831421	0.00980562	0.0121216	0.00934635	0.00548345	0.00881113	0.0117151	0.00754173
Granulicatella	0.0577564	0.857265	0.32992	0.0310877	0.142846	0.235685	0.00543029	0.615221	0.136933	0.374519	0.176385	3.12146	0.618578	0.0517991	0.710926	3.15625	0.011482	0.0101822	0.0157681	0.0233794	0.0129552	0.0220994	0.0136823	0.0135129	0.0187633	0.0127803	0.0202279	0.0180376	0.00674329	0.0242192	0.0156241	0.0203959
Haemophilus	0.070351	0.0451359	0.0411903	0.0128338	0.0507488	0.0679733	0.0100974	0.113039	0.106995	0.034161	0.0237298	0.0230569	0.0139792	0.0137351	0.0692032	0.0224803	0.018657	0.0377942	0.0176442	0.0176807	0.0181042	0.011956	0.014686	0.0347652	0.0252331	0.0188788	0.0182622	0.0173567	0.0126437	0.0248815	0.0483301	0.0100775
Helicobacter	0.138788	0.0974187	0.0780837	0.0232698	0.121148	0.173765	0.0183992	0.0296619	0.0433663	0.0176712	0.0244342	0.0259057	0.0252133	0.0278093	0.0252843	0.0371942	0.0284986	0.0328439	0.0453067	0.0419266	0.0445659	0.0323478	0.0376819	0.0479725	0.0328944	0.0486139	0.0463899	0.0416419	0.0280594	0.0433376	0.0529337	0.0250696
Klebisiella pneumoniae et rel.	0.873251	13.136	3.21299	31.9297	0.611985	0.26903	35.5027	6.95608	7.66185	15.3847	20.0075	22.3713	22.5544	17.8473	27.2038	1.76398	0.0455569	0.0542069	0.0675231	0.0840194	0.0598838	0.0405453	0.0521916	0.082663	0.113035	0.0962153	0.0646915	0.079994	0.138145	0.603022	0.199311	0.0406591
Lachnobacillus bovis et rel.	0.308813	0.197151	0.178575	0.0514515	0.295395	0.374025	0.0407167	0.0656249	0.138305	0.0398182	0.0542835	0.0580595	0.0720574	0.0620306	0.055639	0.08352	0.402345	0.332206	0.405463	0.378766	0.196864	0.41897	0.243702	0.335713	0.275512	0.34623	0.289134	0.46653	0.0935366	0.23774	0.344025	0.192782
Lachnospira pectinoschiza et rel.	0.444089	0.261552	0.256409	0.0715593	0.372861	0.525058	0.0571372	0.0918014	0.203115	0.0569896	0.0753688	0.0841999	0.0873162	0.0853909	0.0784666	0.123733	1.11198	0.626834	0.415257	0.258187	0.826976	0.417028	0.25194	0.336379	0.20562	0.380793	0.300312	0.301055	0.147572	0.222476	0.398405	0.223038
Lactobacillus catenaformis et rel.	0.0552102	0.0322598	0.0300596	0.00904573	0.0476717	0.0638567	0.00725487	0.0118021	0.0167132	0.00680556	0.00984017	0.010449	0.0100387	0.0113738	0.00992488	0.0148667	0.010178	0.0117138	0.0166852	0.0160333	0.0173092	0.0125324	0.0142933	0.0175688	0.013076	0.0187327	0.0176249	0.0160595	0.0111235	0.0171841	0.0216732	0.00966107
Lactobacillus gasseri et rel.	0.952665	0.268188	0.345626	0.0671114	0.329213	0.411363	0.0556441	0.0765844	0.10506	0.0448022	0.0605522	0.0731774	0.282952	0.0685636	0.0650362	0.0994304	0.0735176	0.086231	0.117061	0.118841	0.12073	0.0910131	0.0998015	0.11562	0.0949261	0.135737	0.118053	0.0995135	0.0745936	0.112028	0.138007	0.0618106
Lactobacillus plantarum et rel.	45.5357	3.18152	18.7244	1.42285	4.04025	0.78935	0.512235	0.131627	0.167844	0.092514	0.100956	0.105	0.101357	0.117116	0.0981514	0.153432	0.112909	0.133615	0.505294	0.150913	0.17035	0.121043	0.145424	0.170846	0.12139	0.194132	0.167262	0.148396	0.109793	0.169424	0.228712	0.0913644
Lactobacillus salivarius et rel.	0.689524	0.154697	25.2451	0.0315217	0.501112	0.122055	0.0196671	0.0212409	0.0296073	0.0124919	0.0181118	0.0197511	0.0183586	0.0184461	0.018415	0.0273853	0.017632	0.0217747	1.50036	0.0277146	0.0284223	0.0226303	0.0261501	0.0297742	0.0224719	0.0316449	0.0305891	0.0290327	0.0175127	0.026133	0.0330774	0.0177288
Lactococcus	0.20928	0.0827868	0.351648	0.0370454	0.234276	0.115502	0.0122611	0.0177363	0.0256925	0.0105238	0.0162591	0.015789	0.0189529	0.0166772	0.0152142	0.0229084	0.0166484	0.0196931	0.0318481	0.025073	0.0406411	4.30467	0.0298791	0.0378772	4.77469	0.0964406	0.0304719	0.446197	0.0183201	1.36448	0.190187	0.232181
Leminorella	0.125066	0.0224214	0.0267036	0.00615476	0.0306836	0.0339921	0.00428127	0.00663446	0.00948835	0.00392388	0.00543602	0.0054375	0.00550874	0.00727568	0.00567113	0.00773568	0.00622943	0.00709629	0.00933743	0.0105492	0.00937414	0.00659778	0.00813979	0.00961838	0.00644948	0.00997735	0.00989688	0.00831997	0.0094008	0.0131974	0.0115568	0.00514769
Megamonas hypermegale et rel.	0.0830128	0.0496592	0.0453472	0.0139324	0.0699753	0.100676	0.0110127	0.0177638	0.0258474	0.0103998	0.0145062	0.0153813	0.0150856	0.0166212	0.0151261	0.0219004	0.0160008	0.0189601	0.0264854	0.0239394	0.0256894	0.0190211	0.0266852	0.0299737	0.0192841	0.0282408	0.0270138	0.0239736	0.0159681	0.0253046	0.0311633	0.0148877
Megasphaera elsdenii et rel.	0.165077	0.0996128	0.0899337	0.029062	0.141197	0.19779	0.0216399	0.0354872	0.0514643	0.0211423	0.029238	0.0309213	0.0302645	0.0334156	0.0302841	0.0437584	0.037937	0.0488469	0.0579186	0.0483174	0.0529451	0.041914	0.0574969	0.0665769	0.0516331	0.0612787	0.0602802	0.0485238	0.0350966	0.053609	0.0645938	0.0300942
Methylobacterium	0.0277448	0.0163929	0.0148909	0.00461748	0.0237387	0.033297	0.00366966	0.00599895	0.008597	0.0037537	0.00485894	0.0052392	0.00506265	0.00562663	0.00505475	0.00747145	0.00586166	0.00625281	0.00887612	0.00888389	0.00883709	0.00615117	0.00691495	0.00959647	0.00670047	0.00980359	0.00911933	0.00812204	0.00539773	0.00846621	0.00961831	0.0050451
Micrococcaceae	0.0352416	0.0470694	0.0211205	0.00612504	0.208771	0.391618	0.00500873	0.0182177	0.0117973	0.00741921	0.00748751	0.0209756	0.023813	0.00683257	0.0109247	0.0249568	0.00575377	0.00646152	0.00887171	0.00839062	0.00904249	0.00684937	0.00790887	0.00945691	0.0067363	0.00967651	0.00958686	0.00859485	0.00558439	0.00944957	0.0106442	0.00557079
Mitsuokella multiacida et rel.	0.0827295	0.0487739	0.0459124	0.0139059	0.0874626	0.100234	0.0109108	0.0179904	0.0256694	0.0106616	0.0147207	0.0161946	0.0150248	0.0166518	0.0150266	0.022037	0.0165919	0.0196806	0.0287796	0.0241505	0.0277605	0.0956504	0.0237535	0.0323248	0.0195213	0.0283696	0.0265782	0.0243121	0.0179073	0.0260389	0.0319637	0.0149105
Moraxellaceae	0.102263	0.0758715	0.116248	0.0382267	0.054886	0.0681455	0.0775904	0.0666957	0.0564685	0.039334	0.0468923	0.0579267	0.0508151	0.0404244	0.044255	0.0592017	0.0118323	0.0137274	0.0183317	0.0178251	0.0180585	0.0138368	0.0164474	0.0189097	0.0133418	0.0195826	0.017633	0.0164283	0.0887857	0.144567	0.0221013	0.00992442
Novosphingobium	0.0411366	0.0204723	0.0230872	0.00504086	0.0270964	0.0370007	0.00457068	0.00657999	0.0152684	0.00448561	0.00531859	0.00635549	0.00575626	0.00634926	0.00556376	0.00789697	0.00710405	0.00802657	0.0112753	0.00909105	0.0102134	0.00720776	0.00944281	0.010417	0.00737731	0.0101747	0.0101395	0.00894946	0.00772794	0.0095173	0.0117966	0.00744405
Oceanospirillum	0.111347	0.0677177	0.0609062	0.0194529	0.0941705	0.134329	0.0146874	0.0237493	0.03437	0.0152522	0.021364	0.020907	0.0203978	0.0245653	0.0202745	0.0293266	0.0235143	0.0274196	0.0374358	0.0355857	0.0431043	0.0256829	0.0313298	0.0398615	0.0285115	0.0402554	0.0380459	0.0459711	0.0219635	0.0389417	0.0449269	0.0225474
Oscillospira guillermondii et rel.	0.853769	0.479968	0.412895	0.124643	0.645844	0.927747	0.0987149	0.160069	0.230755	0.0964001	0.12993	0.145184	0.136696	0.149209	0.135772	0.205735	0.531277	0.203091	0.589589	1.38398	3.79109	27.2874	1.14623	1.21635	0.231815	2.18177	3.20702	0.248709	4.30383	1.84379	0.875665	0.482344
Outgrouping clostridium cluster XIVa	0.422624	0.263779	0.23377	0.0757092	0.373944	0.533261	0.0629713	0.0928695	9.58575	0.0696797	0.0796292	0.086384	0.0841125	0.0897938	0.082213	0.118502	2.88903	0.834106	0.777055	0.232719	0.781338	1.41164	0.248283	0.309154	0.433492	0.47606	0.291801	0.40543	0.582338	1.76715	0.33744	2.4799
Oxalobacter formigenes et rel.	0.268632	0.1158	0.263678	0.0376078	0.180357	0.1106	0.0161549	0.0214785	0.0378983	0.0145456	0.0199304	0.0179862	0.0326304	0.0212412	0.0174459	0.025788	0.0658765	0.0640445	0.0942535	0.339653	0.0902579	0.0874795	0.0566662	0.0860841	0.134497	0.0549228	0.0509137	0.0843149	1.27004	0.05018	0.172342	0.0304681
Papillibacter cinnamivorans et rel.	0.279994	0.170899	0.153435	0.0474811	0.241944	0.335106	0.0372893	0.0593157	0.0864899	0.0354988	0.0491109	0.0523344	0.063101	0.0565664	0.050646	0.0738716	1.15285	0.794387	0.195027	0.169615	0.20189	0.331959	0.72855	0.803849	0.407106	0.577461	0.29303	0.720067	0.139847	0.11084	0.91329	0.47534
Parabacteroides distasonis et rel.	0.418394	0.205439	0.179833	0.051798	0.349623	0.344087	0.041754	0.0674915	0.0912204	0.0390017	0.0538757	0.0557157	0.0538835	0.0603491	0.0535077	0.0790956	0.217384	0.0935731	0.166948	0.442985	0.738629	0.15859	0.114118	0.487517	0.116314	0.284423	1.37699	0.106564	0.111903	0.112485	0.318876	0.277494
Peptococcus niger et rel.	0.111764	0.0696838	0.0605953	0.0186158	0.0973127	0.137244	0.0149704	0.0241882	0.0470684	0.0148201	0.0199154	0.0214492	0.0231494	0.0227166	0.0207063	0.0302487	0.0305576	0.0328631	0.0433698	0.0365244	0.044793	0.36574	0.0413632	0.0413308	0.0320419	0.0449426	0.0422343	0.0361091	0.427933	0.0432882	0.0456698	0.026371
Peptostreptococcus anaerobius et rel.	0.0278604	0.0174367	0.0154255	0.00468246	0.0240529	0.0334965	0.00370937	0.00604405	0.00891563	0.00379376	0.00494269	0.00531052	0.00509539	0.00564185	0.00515061	0.0075884	0.00672418	0.00732076	0.0181409	0.00824665	0.0109539	0.00710916	0.00997827	0.01002	0.00733363	0.0116017	0.0100827	0.00842836	0.00726611	0.00874375	0.0120069	0.0078923
Peptostreptococcus micros et rel.	0.138661	0.0832932	0.076438	0.0232201	0.125211	0.168028	0.0181897	0.0297343	0.0436726	0.0177281	0.0244536	0.0262053	0.0253442	0.0279194	0.0252883	0.0370646	0.0276443	0.0328575	0.0442827	0.0404595	0.0443366	0.0320916	0.0395881	0.0477575	0.0332064	0.0471911	0.0452631	0.0399994	0.0295605	0.0471367	0.0525021	0.0252899
Phascolarctobacterium faecium et rel.	0.221764	0.132563	0.120237	0.0373142	0.190071	0.267187	0.0291107	0.0472707	0.0687113	0.0284044	0.0391809	0.0414448	0.0405082	0.0444495	0.0403263	0.0590487	0.0469035	0.0511576	0.185868	0.0651993	0.0720757	0.0652314	0.0744651	0.295577	0.0552097	0.0760973	0.0731702	0.0651712	0.043801	0.0690088	0.176613	0.0399886
Prevotella melaninogenica et rel.	0.583872	0.308404	0.283017	0.0888091	17.9502	0.675125	0.0671118	0.124606	0.156717	0.0666623	0.0901893	0.0962382	0.0920269	0.1025	0.0938259	0.142152	0.132035	0.124741	0.160223	0.151231	0.178295	0.267931	3.44509	8.25108	0.125447	0.173465	0.2114	0.146672	0.11535	0.163254	0.194875	0.22204
Prevotella oralis et rel.	0.194064	0.106416	0.107159	0.0316752	4.74812	0.227683	0.0226018	0.0444603	0.0527681	0.0224681	0.0310676	0.0321933	0.0308791	0.0347577	0.0310696	0.0469891	0.0576642	0.0550951	0.0575996	0.0582913	0.0918114	0.0691188	0.748695	2.12169	0.0444713	0.0765266	0.11675	0.0544661	0.0456901	0.0581079	0.0736206	0.0766442
Prevotella ruminicola et rel.	0.05614	0.0337852	0.0309259	0.00952817	0.0582738	0.0658858	0.00737387	0.0158402	0.0172986	0.00729249	0.0102474	0.0104084	0.0102282	0.0113584	0.0101174	0.0148954	0.0148431	0.0162218	0.0192213	0.0199743	0.0247441	0.0156838	0.0172311	0.0285753	0.0149257	0.0223279	0.0315734	0.018081	0.0140346	0.0192948	0.0245076	0.0139309
Prevotella tannerae et rel.	0.121434	0.0762922	0.075906	0.0205658	0.181233	0.1377	0.0149682	0.0303917	0.034991	0.0155221	0.0205091	0.0210294	0.0208786	0.0227732	0.0204392	0.0297767	0.161528	0.0964154	0.0449088	0.0699287	0.20885	0.0590979	0.039405	0.12146	0.0461681	0.230773	0.104739	0.0378049	0.0586715	0.038883	0.118609	0.17598
Propionibacterium	1.21795	0.44528	4.10394	0.116087	2.64019	0.152652	0.396728	0.0235427	0.0545418	0.272998	0.0216752	0.0327323	0.0186722	0.0212901	0.0240292	0.145156	0.0641209	0.0215361	0.0275263	0.0521639	0.0307124	0.0202771	0.0252722	0.0306809	0.0229831	0.0347358	0.0295254	0.0253802	0.0222673	0.0279124	0.0345704	0.0171778
Proteus et rel.	0.279937	0.269358	0.783508	0.105319	0.209132	0.270218	0.425593	0.300569	0.411017	0.111894	0.081492	0.462262	0.193126	0.175098	0.253035	0.662375	0.047368	0.0542367	0.0735492	0.0661842	0.0738002	0.0532213	0.0647665	0.0777049	0.060612	0.0775097	0.0741633	0.0658784	0.0659239	0.376635	0.0894665	0.0413263
Pseudomonas	0.0684771	0.0539715	0.144445	0.0161571	0.0548078	0.0669695	0.0108985	0.0141184	0.0237723	0.00892457	0.0113582	0.0195985	0.0127613	0.0133175	0.0128427	0.0331735	0.0121091	0.0141275	0.0176501	0.0446226	0.0172678	0.0123154	0.017863	0.0187096	0.0143699	0.0201036	0.0188847	0.0383457	3.01275	0.0254027	0.0242381	0.0101348
Roseburia intestinalis et rel.	0.11159	0.0680157	0.061458	0.0187024	0.100019	0.13402	0.0148759	0.023973	0.0974363	0.0149196	0.0196548	0.0210019	0.0267866	0.0227151	0.0202628	0.0308738	0.375711	0.858361	0.16346	0.171602	0.160204	0.118669	0.144821	0.159774	0.287925	0.135781	0.27729	0.1759	0.0785648	0.0939981	0.48886	0.189231
Ruminococcus bromii et rel.	0.127812	0.0690739	0.0671557	0.0192806	0.0974905	0.13427	0.0153399	0.0251778	0.0351446	0.0156035	0.0201289	0.0245402	0.0227343	0.0232109	0.0216546	0.035916	0.511858	0.29862	0.310207	6.89174	0.622329	0.06016	0.0412676	0.259664	1.22592	0.0446403	0.967284	0.346549	7.01575	0.0708351	2.26101	0.0493432
Ruminococcus callidus et rel.	0.425192	0.234391	0.222336	0.0658914	0.330127	0.466199	0.0543337	0.0845295	0.121121	0.0500976	0.0690493	0.0744096	0.0737791	0.0788089	0.0717878	0.105597	0.267212	0.407569	0.281227	0.260387	0.964163	0.234163	0.238374	0.191303	0.298021	0.701575	0.562559	0.125628	0.94629	7.83253	0.224086	0.165163
Ruminococcus gnavus et rel.	0.251919	0.15325	0.138599	0.0435039	0.216798	0.308255	0.0362267	0.0550132	9.50594	0.0414574	0.0454925	0.0488449	0.0476022	0.0525622	0.0475828	0.0692304	2.55499	0.91948	1.29448	0.353315	0.504378	1.00436	0.433774	0.33011	0.291286	0.374133	1.24121	0.523047	0.634334	1.67151	0.499163	4.23325
Ruminococcus lactaris et rel.	0.110611	0.0673798	0.0603061	0.0191002	0.0947648	0.132371	0.0158729	0.0243334	0.0563047	0.0150639	0.0200659	0.0214237	0.0209046	0.0230892	0.0208975	0.0301352	0.185652	0.054914	0.0917767	0.0791566	0.104886	0.185782	0.0585095	0.181995	0.109788	0.0632574	0.0727634	5.02297	0.0312504	0.0499137	0.0726489	0.362101
Ruminococcus obeum et rel.	1.23048	0.747621	0.672975	0.203739	1.0972	1.56563	0.163148	0.261261	0.426206	0.15773	0.215651	0.233346	0.23899	0.244591	0.221812	0.33867	13.6261	14.674	17.1514	3.53515	2.04861	5.87786	11.5226	11.4108	4.4285	13.9178	10.8086	13.2687	4.6525	8.02176	23.6335	24.142
Serratia	4.0045	8.33417	9.2708	2.03559	0.143194	0.0628627	5.64309	2.76247	3.7889	2.55967	3.16591	7.12956	2.85613	1.31072	5.17069	17.9147	0.0188013	0.0645278	0.0129732	0.125488	0.0189746	0.00662715	0.0161049	0.047859	0.04394	0.0154849	0.00929483	0.0375007	1.52188	0.310528	0.115373	0.00522112
Sporobacter termitidis et rel.	0.782535	0.453955	0.411694	0.133786	0.628071	0.866172	0.120029	0.176151	0.237049	0.107168	0.140779	0.150872	0.148198	0.162459	0.147243	0.199333	0.567036	0.433606	2.60712	6.08676	3.64308	4.60201	0.638252	0.705762	1.08855	0.910837	0.769546	0.325647	4.78068	0.569201	2.18738	0.28773
Staphylococcus	0.333504	1.57482	0.101056	0.0318099	28.3017	56.6809	0.0195969	0.177284	0.0420283	0.0417617	0.0146491	0.18543	1.16424	0.0157295	0.0204504	0.0381069	0.0172147	0.0144425	0.0200174	0.0167809	0.0211634	0.0155232	0.0186478	0.0196882	0.0136598	0.0200352	0.0191957	0.0170088	0.0123378	0.0176784	0.0213921	0.0135697
Streptococcus bovis et rel.	0.476809	0.518324	0.650479	0.0708224	0.409097	0.464203	0.0647347	0.126371	0.106098	0.0467919	0.0643256	0.0679158	17.0009	0.0706968	0.0761599	0.135114	5.8328	5.67906	5.30543	8.78871	12.3026	1.59358	18.1264	3.91583	25.5869	7.95984	1.70729	4.09764	0.705995	0.967187	7.70749	1.48051
Streptococcus intermedius et rel.	0.170248	1.05327	0.772906	0.0357906	2.08435	0.245968	0.0243883	0.0311951	0.0384272	0.0197103	0.0232113	0.0366345	0.0899631	0.0228999	0.0245578	0.0655938	0.106223	0.181853	0.26765	0.200778	0.0983504	0.0772342	0.249031	0.211322	0.373331	0.0873846	0.16504	0.0921151	0.0447148	0.07104	0.183073	0.0684326
Streptococcus mitis et rel.	0.44111	2.2588	1.7725	0.100352	4.4018	0.480313	0.0635416	0.0631285	0.0644396	0.0626209	0.0524356	0.0789493	2.73495	0.0363169	0.0385141	0.0691126	1.36316	1.76201	1.13494	2.24641	1.85557	0.596673	3.69437	1.75279	5.64532	1.39526	0.686406	0.331516	0.295747	0.37617	1.96156	0.327761
Subdoligranulum variable at rel.	0.517089	0.308269	0.279625	0.0842441	0.431021	0.615747	0.0672525	0.108534	0.154758	0.064304	0.0886106	0.0974174	0.130104	0.101097	0.0916117	0.138806	1.9241	3.54432	1.73925	0.603557	11.2124	5.77834	3.45897	0.753797	3.29882	2.60998	8.2251	1.12716	0.250139	1.61574	0.409849	1.13628
Sutterella wadsworthia et rel.	0.792673	0.384539	0.49628	0.0981482	0.433027	0.337568	0.0588935	0.0889221	0.123498	0.0544238	0.0683536	0.0747011	0.0602758	0.0890393	0.0682512	0.100145	0.32693	0.210569	0.150556	0.18274	0.128031	0.0761773	0.0925978	0.254247	0.0750044	0.11032	1.42057	0.0967521	0.103932	0.0983348	0.196711	0.0792996
Tannerella et rel.	0.337584	0.153438	0.13962	0.0410116	0.303651	0.277657	0.0371342	0.0608694	0.07333	0.0324141	0.043848	0.0477571	0.0447724	0.0499394	0.0449346	0.062926	0.108184	0.0973726	0.0973245	0.152194	0.252549	0.0802306	0.0764001	0.162916	0.0727119	0.151672	0.232286	0.07977	0.168347	0.0887359	0.220169	0.11459
Uncultured Bacteroidetes	0.0305172	0.018475	0.0156832	0.00500729	0.047423	0.0353926	0.00402858	0.00721586	0.00918325	0.00390077	0.00522979	0.0054752	0.00534285	0.00605484	0.00538863	0.00773072	0.00774342	0.00840424	0.0105432	0.0122805	0.0128143	0.00861494	0.00892256	0.0124911	0.00760192	0.0142099	0.0181786	0.00933436	0.00927273	0.0128709	0.0168135	0.00765374
Uncultured Chroococcales	0.0277801	0.0166071	0.0151987	0.00466337	0.0259099	0.0370266	0.0036955	0.00593143	0.00861746	0.00366474	0.00487282	0.00557024	0.00523184	0.00555059	0.00504477	0.00762045	0.00569446	0.00666344	0.00921629	0.00839911	0.00859697	0.00641899	0.00783133	0.00920922	0.00662447	0.00999792	0.00889044	0.00823897	0.00597408	0.00880743	0.0129832	0.00495011
Uncultured Clostridiales I	0.831209	0.501275	0.452449	0.141006	0.71611	1.00947	0.110645	0.179221	0.258822	0.105825	0.147702	0.15509	0.151863	0.168735	0.151991	0.223234	0.260054	0.193016	0.260719	0.246496	1.80404	0.429824	0.229342	0.282291	0.27322	0.286683	0.272479	0.24193	5.55218	6.79559	0.496642	0.151436
Uncultured Clostridiales II	0.751423	0.460747	0.418961	0.134043	0.62759	0.881493	0.154735	0.204576	0.24548	0.121406	0.145968	0.167488	0.166352	0.199637	0.160535	0.22391	0.47726	0.190455	0.258952	0.245033	0.482384	1.43775	0.305206	0.265087	0.295621	0.260512	0.260582	0.229911	0.339487	0.2441	0.304104	0.144386
Uncultured Mollicutes	0.399169	1.50674	0.229492	0.06637	0.337716	0.481814	0.0521853	0.08369	0.12589	0.0505753	0.0692474	0.073564	0.0718061	0.0789214	0.0712245	0.103412	0.100386	0.0966106	0.127214	0.116552	0.221882	0.0954925	0.108831	0.132392	0.0929572	0.140285	0.136645	0.11453	3.2643	0.13012	0.15245	0.0742327
Uncultured Selenomonadaceae	0.0273557	0.0153747	0.0147217	0.0046286	0.0229967	0.032876	0.00355921	0.00581825	0.00913589	0.00352224	0.00485364	0.00514847	0.00493493	0.0055075	0.00508601	0.00739428	0.0573077	0.00634391	0.00848935	0.00784353	0.00862575	0.00626222	0.00764134	0.00900725	0.00650321	0.0430552	0.0183996	0.0081659	0.0115052	0.0106597	0.0102829	0.00514491
Veillonella	0.117987	0.0683272	0.078894	0.0199248	0.109978	0.134471	0.0147664	0.0322296	0.516739	12.8007	0.0260273	5.63437	0.0420536	0.0233531	0.0296455	0.0373588	0.108895	3.68462	0.113574	0.121798	0.0720708	0.0367717	0.0784143	2.39128	1.3593	0.271364	0.185536	0.0903249	0.0224061	0.0601303	0.197835	0.14635
Vibrio	0.495389	0.258503	0.231339	0.145709	0.285446	0.15123	0.406489	0.0787676	0.106819	0.0725818	0.0723705	0.171561	0.218379	0.0815751	0.123176	0.0899204	0.02999	0.0312201	0.0459079	0.0367681	0.0506043	0.0312485	0.0398243	0.0427692	0.0315368	0.0405549	0.0418011	0.0378367	0.0397176	0.0438913	0.0467568	0.0243139
Weissella et rel.	0.211932	0.0777752	0.109431	0.0158753	0.175885	0.124761	0.0118492	0.0234594	0.0815522	0.0163453	0.0223946	0.0300447	0.02446	0.0178055	0.0311115	0.0391029	0.029656	0.0247698	0.0373615	0.0304406	0.0331615	0.0336374	0.0330908	0.0302444	0.0331507	0.0376228	0.0437428	0.0404967	0.0459263	0.0320174	0.039324	0.0228575
Wissella et rel.	0.0280504	0.016445	0.0180447	0.00478654	0.023548	0.0332059	0.00369687	0.00604982	0.00854786	0.00364779	0.00488886	0.0052852	0.00500635	0.00566734	0.00531304	0.00752382	0.00613923	0.0164916	0.00911783	0.00826955	0.00889734	0.00736882	0.00872457	0.00940229	0.00746176	0.00944911	0.0150617	0.00963359	0.0070233	0.00877484	0.0113576	0.0052791
Xanthomonadaceae	0.112239	0.050319	0.084456	0.0161046	0.103774	0.0700194	0.0209284	0.0128234	0.0318444	0.00911393	0.0134485	0.0175598	0.0146123	0.0148885	0.0136077	0.0190063	0.0144563	0.015359	0.0235422	0.021853	0.0217405	0.0139883	0.018501	0.0202657	0.0156927	0.0210899	0.0193528	0.0237306	0.0337178	0.0207904	0.0222935	0.0117617
Yersinia et rel.	0.195781	1.36463	0.353565	1.74097	0.164478	0.143651	2.24955	0.103157	0.612963	0.461822	0.700957	2.26454	1.73003	1.03729	1.10976	2.39025	0.0262843	0.0295805	0.0399296	0.0378893	0.0399234	0.0274604	0.0333865	0.0409796	0.0310132	0.0413107	0.0390427	0.0356549	0.0310022	0.062076	0.0585127	0.0221027

## Sheet: Table S3
Table S3. Oligoprofile HITChip composition
	i2_0d	i4_0d	i5_0d	i6_0d	i9_0d	i10_0d	i22_0d	i2_21d	i4_21d	i5_21d	i6_21d	i7_21d	i9_21d	i13_21d	i22_21d	i28_21d	i2_730d	i4_730d	i5_730d	i6_730d	i7_730d	i9_730d	i10_730d	i13_730d	i15_730d	i18_730d	i21_730d	i22_730d	i28_730d	i29_730d	i30_730d	i31_730d
HIT 1	36.4255	39.367	40.3357	36.3374	80.7045	37.2954	38.471	38828.5	36.8626	40.2068	38.6273	62.8448	54.6854	36.9366	35.937	37.8049	364.46	84.2844	1173.3	3350.39	909.197	159.186	48.2786	180.68	110.557	471.335	17959.4	187.426	12209	10289.2	1227.5	4256.38
HIT 10	32.1709	36.9339	32.9266	33.556	37.6483	37.6657	33.8537	32.6496	32.9709	33.6734	33.4561	33.6133	34.2171	33.1069	33.0749	36.5212	203.901	132.22	3632.46	1812.43	7626.06	14178.1	185.848	84.5237	470.926	284.577	64.9754	105.956	23266.4	305.301	414.804	7281.64
HIT 100	32.395	37.8963	33.5928	37.1977	38.1813	37.8859	36.1695	33.1831	34.3096	39.37	38.9809	35.1672	35.2186	36.4621	34.8348	37.5253	71.2446	44.1544	41.2476	44.1414	151.511	83.3623	41.5178	50.3604	48.2782	551.063	42.9817	39.2859	525.834	46.3926	271.072	38.767
HIT 1000	34.0413	44.6914	34.636	37.457	45.729	51.3714	36.8096	35.8952	43.5601	41.8336	38.9795	37.3399	37.032	39.3663	35.4736	42.9862	3220.64	977.15	354.19	719.923	97.4486	212.308	1069.71	1350.72	414.2	566.984	133.21	253.233	376.298	418.784	251.488	709.684
HIT 1001	32.115	36.6637	32.4649	32.9667	36.8795	36.7778	33.6043	32.4049	32.3345	34.4361	33.5733	34.1328	41.1323	33.5229	33.4788	36.7877	41.4539	45.858	39.1717	42.1114	41.753	42.9447	41.5186	39.6542	37.3534	37.1247	41.0719	38.0777	59.0796	44.0276	51.0468	36.4179
HIT 1002	191.596	72.0151	87.3138	39.861	55.8714	47.6873	50.0729	70.9765	42.4239	91.6534	47.716	257.059	139.319	40.3965	58.2914	340.944	539.42	293.424	383.424	236.018	159.108	325.811	428.451	458.34	159.8	266.831	76.9825	179.508	292.631	409.187	207.543	400.612
HIT 1003	44.5179	582.939	171.029	48.0388	45.7057	36.9964	66.8717	66.1354	34.8769	36.166	35.904	33.6813	61408.4	36.5848	57.3914	36.2644	22797.9	17689.3	1609.12	21081	28687.6	3872.03	50068.8	8487.29	76538	13921.5	2674.05	435.352	2537.05	1726.38	18324	2256.48
HIT 1004	42.0009	328.472	181.461	42.0283	58.2068	65.3743	68.8696	57.2353	34.5911	35.7214	34.8798	34.1102	36278.3	35.2219	47.9016	35.8975	17807.2	13409.5	1144.03	15429.2	22012.7	3550.29	42950.8	6708.6	76098.9	8264.58	1734.37	219.953	1640.37	1108.34	12857.2	1580.14
HIT 1005	167.116	1878.38	1798.4	134.009	197.398	63.9356	102.053	155.307	38.4153	106.014	84.3671	43.7371	92000.5	50.8311	116.017	49.7737	72190.9	65032.6	5098.59	60904.8	86891.7	10994.9	108250	22592.6	115779	44455.7	10109.3	1167.97	11258.9	7254.56	74342.8	4507
HIT 1006	346.594	2323.9	2289.88	288.551	347.091	187.862	354.895	62.2553	544.031	154.675	172.298	40.9294	1045.48	38.0973	42.9149	48.984	4351.21	8001.9	14935.7	5761.65	495.729	4140.77	6600.16	7311.69	9820.94	1251.76	3234.01	3017.87	3944.39	1682.94	3138.54	3710.88
HIT 1007	32.7845	45.4395	36.1352	35.5258	78.6293	102.711	35.409	33.7072	33.0865	34.0771	33.8398	34.3995	44.5993	33.693	33.2216	36.3672	50.6699	51.8317	56.638	48.5662	44.5691	52.0192	48.8739	47.8238	48.9622	38.0059	40.278	44.1941	63.737	41.3152	51.5692	38.5986
HIT 1008	69.1857	95.78	110.529	56.5949	80.0891	44.7899	53.846	50.0048	36.2298	56.2605	40.6756	110.344	997.616	38.0865	49.4673	148.109	487.009	438.222	996.608	459.555	218.058	339.294	581.388	300.784	1100.74	183.61	297.627	236.254	189.715	138.458	276.14	288.824
HIT 1009	31.9916	37.9395	34.6754	35.205	39.799	36.2073	34.9813	33.9023	34.2295	35.6976	34.9256	34.5784	33.7681	33.6684	33.9769	35.7349	41.3633	41.7496	40.9681	42.8301	46.4411	43.1062	49.5673	40.6641	39.7518	39.035	37.5508	35.1786	71.0991	43.1197	49.1104	35.0702
HIT 101	31.8977	37.9041	33.1395	33.548	37.7104	37.6524	33.7676	32.5433	33.1156	33.6127	33.486	33.4864	33.3409	33.1768	33.0223	35.7615	71.4256	43.9597	48.3291	115.019	168.391	50.0625	42.0339	71.8884	40.7727	109.414	38.4049	36.4149	261.284	149.957	83.8521	36.5792
HIT 1010	33.0165	36.1907	33.0107	32.6707	39.0045	35.9472	32.6584	32.7574	33.0157	32.7336	33.5502	33.677	33.0534	33.2515	32.3142	34.8167	44.7967	39.7818	37.9169	39.724	38.6637	37.8225	37.6488	37.6207	38.2534	36.5751	39.9114	33.7134	50.2253	36.2308	43.0462	34.9679
HIT 1011	32.7192	38.111	33.9449	34.924	38.4776	37.8601	34.9805	33.1247	32.0914	34.714	34.4465	33.715	33.4882	34.1283	33.5779	35.7311	42.4102	40.8229	38.6955	39.4257	40.1455	40.7625	39.7671	39.9702	37.2962	37.6743	40.3488	34.9567	62.9261	40.2493	51.7391	35.8182
HIT 1012	69.6284	80.6059	352.165	50.8561	61.329	39.8746	126.712	249.325	34.7683	36.7734	36.5457	33.465	60848.7	37.3939	56.1223	35.3243	17354.1	11665.4	1355.85	15570.1	22075.5	3323.54	43721.7	5458.02	67183.5	13495.8	2161.52	266.651	1897.5	1320.72	11749.4	2093.71
HIT 1013	38.2966	71.929	39.492	36.3588	1092.99	1868.49	41.8767	36.305	33.4704	37.5439	34.36	42.7484	101.799	33.8048	34.3867	37.8423	57.6844	64.3913	86.0554	55.8325	41.3813	58.7175	63.7431	77.2582	126.498	40.7172	125.951	52.6018	73.1444	46.2847	62.0868	41.615
HIT 1014	87.7134	102.7	392.496	53.1883	100.716	40.8802	81.6831	98.4614	36.6536	52.4428	39.4796	107.57	65802.5	41.0345	67.9793	126.963	23130.4	22491.3	24136.3	51823.3	29638.8	4677.25	72266.2	8848.81	93136.5	16068.8	3077.55	16024.5	2884.22	1663.39	17133	6130.15
HIT 1015	32.1584	36.6329	33.2033	34.5992	37.2566	38.1275	34.0512	32.8463	33.4175	33.436	34.9616	32.8298	33.1006	33.6787	33.9222	42.096	39.7066	42.5695	41.9478	43.0536	38.4509	42.9088	42.6826	40.5601	35.5169	35.9124	38.8481	37.0761	54.1562	48.9946	59.9896	36.3194
HIT 1016	37.1894	41.2198	38.0948	38.8467	41.0979	36.7755	39.4121	34.6525	33.9812	39.6232	36.4488	34.9931	34.9481	35.5039	35.0162	37.593	42.8568	39.4843	37.8221	39.2854	40.7215	40.078	40.5819	38.6327	38.5098	37.9507	43.1541	38.4118	57.6248	41.8821	48.9108	40.0803
HIT 1017	33.3267	43.1683	36.6225	34.5275	36.6223	37.6609	36.6091	34.1373	33.8739	34.8311	35.0709	35.4389	34.0689	34.1132	34.4729	35.8971	49.2057	43.6523	47.0412	42.0088	42.1811	42.5521	42.6455	38.8007	38.3534	37.4217	38.4898	37.9729	66.9752	44.014	49.8622	37.5804
HIT 1018	32.322	38.5505	35.2598	33.3665	38.7265	38.5419	49.2898	41.1502	33.4137	34.3484	34.2199	33.2689	1663	34.1283	33.3049	35.7598	306.006	194.189	49.2816	241.723	316.125	87.0403	640.744	352.622	1453.86	224.197	70.4588	39.3756	73.0999	56.5771	159.12	67.6218
HIT 1019	34.3334	53.8301	34.9562	35.9867	133.558	254.514	34.6645	48.3972	36.7737	49.8831	38.7346	114.573	57.0847	35.032	54.2424	129.166	53.4192	51.3885	53.5924	46.9789	46.8145	48.8788	49.7846	50.7425	45.4753	37.4746	49.2927	38.0221	88.8119	45.18	56.497	38.7345
HIT 102	32.9704	37.8538	33.23	33.4664	37.7381	36.5366	33.347	32.9551	32.7455	33.6967	33.3826	33.1758	33.4809	34.049	32.7676	35.7004	114.643	43.3725	47.5521	104.868	1090.4	129.6	43.3053	314.7	72.9468	1023.22	43.2773	36.3696	1118.97	163.796	462.323	36.9378
HIT 1022	37.6909	168.21	130.288	37.8259	56.8589	66.3803	63.9459	52.2992	33.9183	35.4718	35.7018	34.3101	24150.9	35.3421	38.1979	36.7078	8443.82	6356.05	590.562	7339.02	10095.7	1649.42	20964.4	3242.41	44429.8	4120.78	908.739	118.932	780.629	577.495	6325.73	794.259
HIT 1023	456.928	4005.35	4540.86	397.145	448.891	58.0558	155.012	223.115	41.8802	241.505	220.814	47.996	116328	72.5337	199.223	79.8793	100880	103547	8314.29	86058.6	118941	13808.5	121364	28331.9	124014	73371.9	17901	2547.29	21058.3	12669.8	116720	6707.14
HIT 1024	132.089	166.515	922.29	74.6778	98.923	43.4297	134.292	386.691	35.7449	34.7108	41.1219	33.0772	112229	44.3398	96.1023	36.3278	49034.9	39020.1	4104.22	44715	63830	8243.66	97418.5	14293.1	111976	41397.3	6479.83	737.631	6920.9	3918.51	36182.7	4579.51
HIT 1025	37.7223	48.1262	107.917	38.5594	40.7796	38.2266	80.7845	85.4851	33.7413	34.3011	34.616	34.2461	30735.5	35.1945	40.4883	35.3486	4917.97	3751.62	444.661	6541.27	6915.34	1185.2	15485	1715.15	32330.6	4525.38	796.005	106.608	631.254	394.784	3538.08	759.687
HIT 1026	137.623	158.313	946.436	81.5356	132.518	44.0919	85.704	109.752	38.2593	54.6506	41.7028	112.15	89248.2	48.4471	101.965	139.602	41755.1	38038.2	39879.8	74527.3	53582.8	7472.66	107139	14917.7	123129	31775	5809.52	32151.6	6217.92	3467.06	35059.4	10738.3
HIT 1027	32.1967	37.3138	32.6913	33.4092	34.768	37.0152	33.311	32.5423	32.7578	32.9679	33.7996	32.9864	33.1982	32.8788	32.4711	33.1457	42.7207	40.0384	38.5267	40.7478	38.0332	39.4386	39.1646	37.2692	38.9825	37.1685	38.8055	34.5347	69.1154	42.4574	50.7858	36.1254
HIT 1028	32.0673	35.998	33.0722	33.9281	35.5956	36.4496	32.3522	33.5091	33.5047	32.4934	33.1587	33.5292	34.2395	33.5754	33.4968	34.2724	42.9286	40.8115	40.6493	42.118	42.1243	42.802	41.3086	39.9152	38.0771	40.7887	39.1913	34.8304	52.4727	39.2289	49.6756	37.6576
HIT 1029	32.0642	36.0565	33.4511	33.5679	37.2213	36.5764	33.1198	32.5515	32.7191	33.4792	33.1735	33.3094	33.3007	33.1148	32.9302	35.4875	44.7714	40.1517	39.4297	41.2508	40.0839	38.2751	39.1642	40.0373	37.3819	36.5773	36.1681	35.6439	59.6891	40.3551	48.8583	35.4155
HIT 103	32.5208	36.2912	32.8557	33.9239	41.9349	44.2968	33.4649	34.3073	32.8635	34.0279	34.598	35.1788	33.3058	34.3434	32.7132	34.3762	43.9052	44.3189	41.5578	41.3848	40.8448	40.8008	42.1732	41.2498	39.4676	37.0248	46.0986	37.1549	63.901	43.3967	53.2338	38.4139
HIT 1030	32.8096	37.4238	33.5323	33.2019	37.4112	36.8169	36.255	35.5205	34.1828	34.1537	34.0275	34.0643	334.801	33.9571	35.0247	35.9351	86.9908	71.8149	49.093	86.0421	94.2442	71.2975	162.901	74.5999	226.153	73.9203	44.8891	37.7244	62.6758	42.686	70.0081	40.3711
HIT 1031	32.3634	36.0426	33.1323	37.1217	34.9223	35.3185	33.4078	32.6076	32.9831	34.2672	34.7341	32.8538	33.6679	33.9912	32.8576	35.8215	44.4658	43.1967	43.6256	41.8531	42.4308	43.9661	40.04	78.12	37.3209	37.0773	39.0204	36.1139	59.1932	40.8499	52.2744	37.8055
HIT 1033	32.1494	37.4328	32.1673	33.4004	37.8817	38.3619	33.3545	33.0518	33.1963	34.7064	33.4512	33.2821	33.1833	33.1512	33.0157	35.6198	45.0312	93.7354	77.4552	41.7382	87.6466	42.0742	52.3095	48.4697	41.8108	40.6878	66.4502	53.1442	62.8884	47.831	64.9874	46.1351
HIT 1034	32.8527	36.8203	32.8541	33.1428	37.6788	35.9736	33.6439	32.4849	32.7763	33.7615	33.1099	33.6186	33.2899	33.4008	33.5032	36.2548	44.2146	47.9083	45.2029	38.965	45.7283	41.0951	40.8009	40.2631	37.4878	37.3273	43.8566	38.9943	56.0595	42.4096	52.9551	37.5025
HIT 1035	31.9555	36.2527	33.1822	34.3484	36.5519	36.7032	33.8364	32.2149	33.0389	33.0655	33.195	33.4058	33.2683	33.453	33.2936	35.9322	44.5663	417.284	301.99	40.8391	66.8706	38.3941	114.065	101.568	57.4522	52.6263	49.6896	92.0752	60.324	92.6001	171.883	87.3488
HIT 1036	66.3171	81.0493	329.861	46.2109	58.2759	41.8158	133.321	269.1	34.0985	35.3425	35.3541	34.1702	68992.6	35.8444	50.5568	35.7681	16300.9	10773.7	1252.61	14960.7	20838.2	3255.76	41376.6	5186.83	66201.3	13902.1	2226.77	282.971	1761.39	1178.18	10553.4	2072.43
HIT 1038	108.118	107.611	474.608	62.0397	105.958	43.0434	76.6453	79.6793	35.0275	48.5938	38.3274	71.8519	58295	40.5343	69.5918	103.266	22349.4	21636.6	22139.3	45334.4	27497.5	4894.43	66011.3	8324.61	89678.3	14345	3549.18	13052.3	3454.73	1855.09	17924.2	5787.41
HIT 104	32.2963	37.4902	33.13	34.637	36.1113	35.6013	33.7189	33.0013	32.7526	33.039	33.8909	33.4412	33.7795	33.4892	32.8889	35.0732	43.2499	41.7892	43.9694	41.0868	40.3832	41.2856	40.9903	40.0706	40.5776	41.3682	56.7677	37.6593	71.1141	41.7383	49.6772	36.4855
HIT 1042	38.4074	77.1154	51.7332	41.2931	57.7696	62.8797	38.6137	34.9625	47.9633	40.836	42.8734	37.9948	45.5115	35.7415	35.0188	52.7785	1131.53	269.308	537.071	208.657	106.874	245.771	397.374	317.421	219.031	197.815	258.553	310.509	145.235	364.298	852.988	1333.01
HIT 1043	32.5378	108.055	35.5316	36.2439	99.0321	149.046	34.5421	144.309	54.0038	159.071	58.259	696.989	136.36	39.0936	114.089	1558.54	43.8584	43.4004	44.3271	43.1001	41.0549	45.2482	43.9934	40.8661	42.8584	38.021	40.6904	40.4313	68.0144	43.5432	55.0136	37.6317
HIT 1044	231.482	218.406	239.753	65.2861	139.732	66.9929	75.5957	59.1384	37.019	71.08	48.8247	133.853	1429.16	37.947	51.1407	166.702	1095.46	1619.4	7273.89	1023.66	386.502	720.231	1523.34	1262.53	2109.56	644.796	2006.43	787.266	690.518	475.869	940.063	1277.07
HIT 1045	31.9266	37.5862	33.0426	33.3383	36.2465	38.6048	34.3237	32.9656	33.1808	34.3654	33.1283	33.2708	33.7828	33.1638	32.7914	35.1669	44.5744	57.216	41.1734	41.1808	42.6119	43.4316	42.1633	309.202	36.6727	36.7295	39.763	36.2744	55.3076	41.3344	50.8509	36.7055
HIT 1046	32.0262	36.9098	33.0372	34.1126	36.9182	36.97	32.75	31.9808	33.224	35.555	32.9811	34.0914	32.8025	33.5286	32.9767	35.3684	41.6121	49.5924	39.4238	42.3508	42.557	39.223	41.7117	118.277	37.05	36.8554	40.2692	34.7786	58.7805	42.0536	50.7802	35.0852
HIT 1047	32.1689	36.9378	33.0536	33.7754	36.4991	36.618	35.6917	32.708	33.1553	34.1929	33.9268	33.5641	32.9786	33.0166	33.5244	34.0435	42.8845	38.9429	39.0389	40.0268	39.5342	40.2974	42.0855	763.985	36.9354	35.9775	38.5341	36.8614	54.995	40.4249	50.2943	36.0839
HIT 1048	42.7371	52.9112	113.111	38.3648	44.6985	38.0795	138.364	189.079	33.454	34.0094	35.9629	33.2314	39194.9	35.4246	42.2102	35.0737	7510.84	5210.64	588.36	7016.37	10026.2	1608.62	20749.8	3571.94	40671.1	5735.36	807.832	113.831	682.623	502.12	4410.25	1106.16
HIT 1049	32.7786	37.4358	39.5732	34.3101	38.839	37.0302	36.8129	33.0978	32.7925	33.8574	33.6722	32.7066	35.1731	33.4105	32.9323	34.961	45.4333	73.4553	74.2811	44.3099	42.9266	71.6251	49.143	365.595	46.3591	37.8593	38.5787	59.822	60.8876	43.1709	51.6791	41.6549
HIT 105	32.413	38.5002	33.6886	39.9765	37.6496	37.5707	37.6536	36.8558	42.0212	40.536	52.9258	46.6013	53.6252	38.3683	38.412	35.5545	45.8599	44.9133	97.8259	42.8829	40.5073	42.2813	41.2267	42.4653	37.0213	38.5031	191.332	36.7184	68.4983	42.3577	52.7504	55.4603
HIT 1051	240.535	2446.18	101.659	155.539	79880.5	103595	164.771	538.243	59.2032	207.435	41.4589	860.638	10824.2	42.7722	48.8708	108.339	44.4782	40.3259	41.9295	40.1384	43.7312	43.6463	41.282	38.6126	36.8084	37.6267	39.3922	36.0695	60.7729	42.179	50.8075	36.1103
HIT 1052	33.2816	46.435	33.8255	34.1338	259.005	444.737	35.2475	33.7385	33.5845	34.5426	33.1414	35.466	46.0509	33.1256	33.0786	35.9989	43.017	42.1717	43.0801	42.8435	39.6582	42.6273	45.2571	43.544	45.085	39.6932	40.6563	35.6376	62.7519	43.5263	52.0182	36.5419
HIT 1053	1364.02	17419.3	820.946	515.76	77662.1	96312.6	187.34	2835.32	529.983	1962.13	164.975	6392.96	32800.5	110.525	356.395	260.567	52.9097	49.8036	46.9301	45.5424	80.2305	48.2511	46.4791	44.6627	39.9958	40.4371	45.1594	37.6852	67.4251	43.3076	50.9781	45.5301
HIT 1054	1141.47	10571.9	562.32	1600.89	113686	127973	1103.92	2376.26	367.088	1460.11	113.639	4632.54	21493.3	102.121	254.662	1667.77	99.816	74.2276	139.581	58.4162	147.848	74.7834	134.668	53.2077	61.5201	73.2447	57.1593	41.6449	301.049	51.6051	66.324	74.1729
HIT 1055	87.2328	487.31	53.2621	55.1429	10520.7	19737.2	56.0755	91.3217	45.7088	70.1382	38.2865	155.073	830.026	38.0703	42.0232	53.0948	50.2976	47.7918	45.7311	45.2584	46.0489	45.9909	44.3064	44.2648	40.3326	37.8878	40.5076	39.2792	61.8216	42.8257	51.2428	41.2537
HIT 1056	584.791	6775.62	342.113	212.126	48090.3	71221.4	143.95	1367.62	240.923	938.158	71.9953	3280.5	12801.8	71.4519	174.549	208.545	70.19	56.5593	52.8507	49.2783	62.5235	53.4106	54.4123	50.8911	43.6222	44.0712	45.5517	44.8432	68.0492	46.9702	57.6386	54.8737
HIT 1057	32.8871	37.2825	35.1716	33.5648	37.0872	37.5181	33.6342	32.9875	32.6886	33.4353	33.4064	33.8697	33.2488	33.4488	33.7319	37.542	45.5024	116.439	116785	119.254	44.6902	56.0546	9417.71	46.2096	68.025	42.0597	95.5528	83038.6	58.1628	42.3797	49.3368	26492.5
HIT 1058	31.8753	35.7687	33.7229	34.1957	37.2612	37.4883	33.5263	32.6898	32.9748	33.688	33.5539	33.3638	33.068	32.8482	32.5365	34.4545	45.0418	43.2639	2490.19	42.7093	41.4883	39.6955	158.237	38.8708	38.406	37.3584	42.586	2500.06	57.3436	41.1818	50.6879	480.796
HIT 1059	32.1728	37.2357	33.2849	33.2258	36.7243	36.6689	33.3456	32.5347	33.0695	33.4302	33.6397	33.3663	33.5956	33.4811	32.7256	35.4176	48.7616	50.877	6883.9	46.0117	43.1625	44.6817	399.368	39.2074	39.3532	37.5424	44.9039	6838.98	58.8051	41.2759	46.8378	1704.53
HIT 106	32.0844	36.5351	33.6206	33.8755	37.9449	37.2462	34.3534	32.6765	215.719	36.2421	35.1221	34.7647	33.7093	34.4145	34.7715	35.658	9993.73	75.0702	43.2217	42.1117	49.4504	48.5552	79.2444	58.4513	51.7777	2477.1	769.527	36.5166	1638.57	247.32	53.0793	53.9265
HIT 1060	32.5727	37.795	34.3213	33.6725	37.3053	36.1836	43.9395	38.516	33.3166	33.9674	33.7722	32.9589	1114.94	33.3471	32.697	36.7343	2758.43	16238.6	34586.5	56933.8	615.002	7333.4	34290	6291.76	2676.7	2509.57	2452.17	30694.3	1312.76	1700.93	2476.33	29074.7
HIT 1061	83.266	45.7524	187.482	70.1026	143.38	40.7824	35.0295	33.6132	33.4519	34.4921	36.6336	33.4807	38.1805	33.6444	32.9412	35.8522	43.2596	54.4182	3439.1	51.9144	45.177	2155.2	213.24	43.052	609.337	55.8675	49.1605	2452.48	63.0093	165.252	61.3644	731.287
HIT 1063	151.466	88275.1	346.102	1239.87	120.897	58.094	64.4624	2336.96	17910.7	48531.2	20627.6	35152.1	3246.3	871.817	1854.76	129180	76.9115	65.5791	59.1042	54.0885	57.5826	227.74	122.628	54.976	290.926	41.067	52.9142	140.661	69.317	52.3408	60.1541	72.5915
HIT 1064	32.3815	301.01	33.8556	36.4316	43.5056	36.8519	33.4108	34.3878	83.2063	265.26	75.1674	211.419	33.0047	35.0498	33.2625	3981.75	42.311	41.1405	44.7986	39.2337	42.2709	41.3415	40.7745	39.2618	39.7599	37.1675	37.3508	36.9754	89.873	44.7163	51.8495	35.6155
HIT 1065	36.5913	2385.04	43.1404	72.6914	72.6291	39.2297	35.2197	39.8423	509.808	2329.33	535.416	2388.96	34.1866	65.6176	41.4283	28970.5	42.1049	41.8999	39.5085	40.3004	39.5834	41.4893	40.6169	39.3991	49.3064	36.9777	39.3821	36.9852	62.5254	43.7499	50.6712	35.6968
HIT 1066	84.7506	13600.7	338.18	170.762	277.668	657.103	42.0143	226.249	2678.21	10505.6	2227.21	11188.3	161.859	156.698	144.901	100763	59.2325	65.5648	52.7784	45.4248	68.2868	79.592	71.4297	51.0747	140.949	55.0837	47.1988	94.0418	116.995	972.739	58.4021	67.855
HIT 1067	46.7239	5079.39	99.052	153.757	136.271	105.524	71.2705	720.374	1101.06	4262.67	1067.86	7429.92	721.175	132.833	770.385	53268.1	102.587	78.9398	79.0307	64.2262	65.8612	78.938	65.5898	78.7404	98.8328	50.27	56.3779	83.6907	113.224	395.962	74.5486	87.5598
HIT 1068	569.572	13908.2	24785.4	886.507	481.927	185.161	101.515	10002.5	2865.79	14248.8	6036.11	56743.9	15157.4	1329.01	19405.6	83893.6	194.725	128.675	261.28	158.536	201.14	613.694	318.309	84.7753	223.176	199.39	197.282	324.569	141.694	911.967	89.4855	469.663
HIT 1069	394.722	61012.1	3907.58	9505.56	2174.85	74.0828	118.731	25771.8	6569.08	50011.6	54946.6	127657	50046.6	8282.13	95704.5	13309.6	54.5799	51.6698	53.6146	43.9531	58.9352	6341.18	55.4472	46.0516	55.6703	43.4691	1749.33	42.7831	65.3095	1331.9	50.7151	4115.73
HIT 107	32.0164	35.0255	32.5789	34.4454	35.2633	36.07	33.5783	32.506	32.8506	34.0928	33.3358	33.3124	33.8514	33.0217	32.2608	34.7699	39.6486	36.8845	39.4094	38.0583	41.5916	39.6253	41.9443	38.4417	35.8392	36.4759	40.7162	35.5078	59.7003	41.0474	46.494	35.7131
HIT 1070	32.7104	100.125	38.2487	41.3214	39.688	36.9227	35.07	219.693	43.7256	219.931	88.5682	1143.01	240.771	44.1936	259.62	40.9433	44.8598	40.4265	42.8094	40.8566	41.3208	52.2137	41.9616	39.1285	37.383	37.217	40.3538	36.8554	65.0555	45.6107	53.1557	39.4761
HIT 1071	38.4767	750.255	61.2409	96.8324	114.371	39.4192	36.2874	380.184	47.9699	370.884	121.771	3352.51	564.353	45.9853	823.339	126.857	45.787	37.8182	39.7213	40.6141	41.0355	89.7226	42.0525	41.009	37.373	37.2673	72.843	36.0126	56.0561	49.61	49.8471	104.976
HIT 1072	336.271	3925.04	28954.4	495.255	872.914	1207.04	130.742	8037.43	2997.82	8263.33	2785.35	40160.3	10308.7	685.111	11807.5	9090.5	116.687	87.2001	131.322	82.9498	216.86	256.736	196.759	49.3165	104.09	99.5995	133.291	110.518	802.271	101.164	79.1468	225.497
HIT 1073	76.9905	7197.63	438.479	877.792	428.532	349.607	63.3026	9104.89	1463.67	9698.39	5394.89	46427.2	12991.4	1187.58	19394.2	40384.9	100.999	66.614	89.0842	152.813	101.424	425.882	84.4229	64.1975	143.89	45.0072	177.24	178.327	86.2597	336.804	79.8307	327.019
HIT 1075	69.9768	24123	103.235	412.489	106.426	50.6331	41.5509	60.8355	5897.4	20294.1	5352.7	17669.9	44.6822	255.112	67.7621	116422	53.8413	56.5036	45.0868	45.6767	122.565	108.05	64.4682	45.4971	1082.74	37.275	41.1275	160.15	64.1723	42.8801	49.4523	48.872
HIT 1079	57.1999	10355.8	197.472	336.194	182.699	68.9528	50.1751	4252.68	2405.61	8620.55	3127.03	26046.6	5281.04	475.175	4915.63	81489.8	62.4424	58.6404	54.2169	70.0367	67.6078	147.116	63.6917	52.9135	150.945	48.6814	84.3376	129.458	100.421	675.607	55.2315	139.796
HIT 108	31.9443	36.772	32.3314	34.3596	36.0406	36.6419	32.8721	32.3507	153.415	35.3429	33.5115	34.2739	32.9135	33.2161	34.0988	34.8396	131.528	151.053	65.865	41.4783	41.0558	67.4381	339.254	42.7718	40.3236	58.756	112.041	35.6468	81.1314	47.4195	45.1467	50.4833
HIT 1081	47.2741	41.2874	74.2368	47.0273	82.2306	38.1178	35.3406	33.1244	34.1972	34.3732	36.8125	34.485	34.2962	33.9283	33.1153	35.801	46.4942	50.8693	45.7158	44.7755	42.7276	119.768	44.4804	43.9296	36.3489	39.8497	40.285	36.714	61.1186	42.6142	47.5568	37.3511
HIT 1082	37.1313	35.7812	36.0632	33.4453	38.2703	37.4536	33.8543	32.7341	32.8922	33.1721	34.3983	32.928	33.0239	33.6033	33.2627	35.2348	43.7649	38.6907	43.5453	40.3938	37.7325	43.3905	38.5044	38.1034	36.9489	37.1479	40.8046	35.6988	51.5272	41.9988	49.7365	35.4243
HIT 1083	1646.69	369.43	5940.79	1738.02	4246.47	89.1576	49.9406	32.6233	33.0326	33.0648	65.6773	33.519	33.5677	34.0508	33.2725	39.5064	40.883	38.1098	38.9915	41.1423	51.0498	4726.47	54.1911	40.8258	37.8728	35.6628	37.7337	45.1026	60.427	42.7037	70.5783	58.9954
HIT 1084	2382.47	718.909	5333.91	1718.01	5007.01	134.466	105.699	33.1873	159.154	36.3488	146.463	33.4717	34.0317	34.4953	35.6049	47.8012	73.4446	59.5641	46.4887	42.4606	227.316	75905.9	178.619	76.2291	34180.3	1171.07	73.7581	12234.2	99.3154	8545.39	829.176	4787.1
HIT 1085	110.861	48.7056	239.837	78.9235	191.568	40.4861	36.0647	32.7122	32.7466	33.3468	38.2968	33.8541	33.8253	33.6929	33.5138	38.0118	39.7675	38.0409	322.506	40.2945	55.6476	3973.43	55.8216	37.4993	1099.29	70.6401	40.2151	819.92	57.6449	203.572	64.8174	255.703
HIT 1086	2465.68	712.497	8237.93	2323.71	5327.97	136.601	62.6121	33.3842	33.3796	37.6928	61.3352	36.9051	38.6452	33.1873	33.8151	39.7515	51.4642	45.411	44.1285	50.1489	152.126	78547.4	93.7055	71.3326	32007.5	801.162	52.8202	10732.2	81.3956	7988.91	750.507	4175.73
HIT 1087	33.4635	42.2853	396.224	74.6691	39.3337	36.0366	38.0896	33.186	33.8958	34.8799	34.2156	34.2462	34.6645	33.2853	33.4947	36.3457	48.2126	43.3511	42.1558	41.8911	114.978	76947.1	88.4018	167.518	93394.2	432.295	47.816	3292.5	136.565	30022.8	3204.32	2728.22
HIT 1088	32.2019	37.0796	48.3839	36.875	36.5944	37.3345	34.6498	32.4886	33.0203	33.6985	34.1927	33.3237	34.2799	33.0119	33.8681	36.0682	45.7329	41.5354	40.8986	40.5884	55.5287	4326.94	43.0533	46.5572	10556.4	56.4678	40.9175	62.5654	67.0468	1914.37	247.951	242.394
HIT 1089	40.2797	82.4805	2222.88	98.3126	61.7763	38.3094	42.303	33.4233	32.5806	33.708	34.2081	33.4297	32.8411	33.7787	33.0903	35.3495	40.5603	41.5089	40.3021	40.5276	168.534	82797.5	80.7429	85.731	50865.4	1025.46	66.2282	19525.3	81.1764	12978.9	1430.7	6829.27
HIT 109	32.5293	37.3155	33.4674	33.7571	38.7916	38.9035	33.3594	33.4813	33.8719	34.6881	34.3148	34.1626	34.642	34.0434	33.537	36.3278	45.0609	43.6172	42.1935	42.9515	42.6216	44.9394	77.9746	40.005	38.427	36.9719	40.1828	36.9414	61.5839	42.5434	52.6219	37.4045
HIT 1090	1801.83	532.355	5340.74	1903.67	3951.59	112.43	90.7271	33.3782	77.5107	37.7857	145.065	34.8481	34.9027	36.0211	34.8224	43.4531	55.0077	47.1855	43.3506	41.6439	175.584	60725.2	125.417	59.3395	21654.1	626.203	58.4174	7032.27	86.6789	5837.31	613.209	2773.2
HIT 1091	229.404	67.9777	559.434	163.023	397.073	45.6582	38.0806	32.9891	32.8382	33.7009	40.3482	33.7361	37.2773	33.8207	33.5084	36.0115	55.0905	58.0089	3665.67	58.1093	68.4333	8473.42	195.648	46.2533	2540.06	100.123	50.9963	3113.19	59.6931	467.677	97.7855	1019.8
HIT 1093	32.8026	37.5969	33.4945	35.64	37.042	39.3811	38.018	32.3361	39.9492	37.0752	34.094	36.1591	34.4926	34.1916	36.0594	38.8265	109.262	283.619	71324.7	383.938	53.5774	97.5279	954.629	116.948	86.6095	100.192	16827.8	344.665	67.9808	63.8724	636.686	223.877
HIT 1094	32.025	37.1176	32.7155	33.0896	36.9526	37.6449	33.6708	34.0953	33.3489	34.6359	34.9355	33.2849	34.555	35.8021	36.1412	39.9829	39.71	60.4282	9573.67	67.3473	38.8158	40.5507	63.8606	39.3816	36.5963	43.5078	1976.28	41.5651	65.2694	43.3966	61.2475	35.432
HIT 1095	32.2545	36.2511	32.7822	33.5702	37.7445	36.5075	36.3564	33.5295	33.1003	34.5866	34.3268	33.4929	33.2938	32.4593	33.413	33.5983	45.1269	58.1415	13335.7	53.0375	39.7	43.2683	50.5158	39.4283	38.3831	37.2241	3866.16	43.2485	59.3651	44.3145	60.5129	37.1862
HIT 1096	32.1595	37.5801	33.5079	35.9118	37.4686	37.6066	35.4027	33.0725	86.5213	38.6779	35.4815	34.0558	34.2968	34.1648	33.7549	38.9192	4303.88	4037.13	17119.6	542.102	142.032	1513.48	5557.3	1319.35	799.282	2140.56	4157.82	417.413	1271.36	1987.57	5921.8	9023.66
HIT 1097	32.061	35.8798	32.8298	33.0677	37.0491	37.8468	33.4447	33.0305	32.5109	34.136	34.0193	33.4951	33.5045	32.8752	33.6127	35.1997	42.7388	40.378	1541.29	46.7871	39.6313	43.6364	276.053	37.832	37.1261	36.0949	269.807	36.967	54.276	41.264	66.2948	36.6449
HIT 1098	32.6394	37.5174	32.872	33.1535	39.0372	39.7251	33.0304	32.8642	35.894	34.2173	33.7447	34.0962	33.6034	34.0617	33.4498	35.4213	1321.25	1675.58	18269.4	385.593	103.604	501.913	5421.06	459.101	481.162	1032.09	4683.38	305.182	456.917	760.102	2580.36	4418.26
HIT 1099	33.0117	37.0724	62.4016	33.0506	36.8743	36.0016	33.5758	32.6437	32.8169	33.5667	33.1301	33.0359	33.3192	32.6397	33.2324	35.287	175.222	61.0784	77.4723	174.903	129.463	56.6929	47.1602	86.5507	76.3788	40.4992	70.9927	60.5907	60.2845	45.184	69.8587	101.204
HIT 11	19339.1	958.207	3355.16	793.172	1138.2	74.8508	612.325	42.9609	50.7729	36.0977	91.1479	58.3716	57.7059	57.2586	61.2631	76.8784	3594.85	238.703	30449.2	1760.33	8071.67	30491.7	405.078	2486.87	358.667	4842.94	3223.25	95.5025	13687.7	25744.8	12249.8	1533.04
HIT 110	32.277	37.0141	33.3396	34.0723	36.8788	37.1335	33.999	32.6033	33.4091	33.9797	34.6094	33.2479	33.18	33.6054	33.9389	35.1894	43.1405	40.1521	40.2639	40.6091	41.1107	41.3487	41.9737	39.883	37.2662	37.1331	39.0591	37.0491	56.9943	41.2312	50.3363	36.1412
HIT 1100	32.8148	36.3147	35.165	34.3542	37.5449	41.0657	34.2293	32.2574	33.3782	33.7651	34.083	32.4449	33.6494	33.9497	32.9116	35.3836	54.072	50.351	42.893	45.0241	49.3012	45.4393	45.1752	50.4368	40.4226	36.7628	40.3941	38.401	61.1762	43.2492	51.079	40.428
HIT 1101	33.7028	38.7912	40.6585	34.1144	39.8251	40.8402	33.4331	32.7884	33.2853	33.7856	33.7847	33.5243	33.6625	33.6546	33.6365	35.9559	67.6718	45.7924	46.5113	59.792	56.4301	42.0772	41.6391	46.1781	44.8018	37.4617	45.2182	42.156	58.1946	43.2047	56.1448	51.4445
HIT 1102	32.3368	36.6015	39.6677	35.4244	38.5475	36.6523	33.6719	32.7565	33.4287	32.9001	33.6754	33.1184	32.8069	33.4464	32.4809	35.7109	56.5079	41.8218	43.6939	60.3888	47.2789	43.3629	41.4352	44.8482	41.7027	38.9322	47.94	38.738	59.4118	42.4681	54.5941	52.672
HIT 1103	32.7156	37.2308	37.5449	33.9008	38.3766	36.4613	33.6963	32.5283	33.2542	33.1998	33.3477	32.7022	33.167	33.2343	32.7228	34.9137	57.3084	42.9486	42.6041	53.3793	47.7633	44.104	40.6676	41.0685	40.8556	36.5851	43.5759	38.8728	59.8264	42.2083	53.0257	46.6434
HIT 1104	36.1858	39.3129	74.2441	39.6545	48.6552	37.3452	35.3183	33.0309	33.6052	34.8862	33.8116	34.3181	33.8304	33.6236	33.5487	35.2083	249.122	74.4133	96.4778	206.891	169.61	59.3265	53.823	92.2055	74.7817	42.6788	97.1813	54.1021	60.3978	43.4137	68.2479	114.708
HIT 1105	34.367	62.1783	157.902	36.0456	88.6161	42.0029	36.3902	37.2485	47.3449	81.7123	42.6273	78.8198	38.6504	35.9898	39.7818	823.437	60.6501	113.367	43.9646	46.5789	53.7918	50.3671	44.3423	63.2674	48.2728	74.1131	50.6699	349.538	77.1917	2803.52	54.4639	153.12
HIT 1106	32.0829	57.2974	32.955	34.0646	37.8368	38.0655	33.342	33.0542	37.2687	53.0462	38.1059	47.7787	33.0182	33.2473	32.8911	413.594	42.9921	39.2995	39.3821	41.573	42.1179	40.5243	39.8896	39.6794	36.5879	36.4734	38.5116	36.6256	72.6425	50.6079	52.326	35.8417
HIT 1107	32.5921	43.4193	38.354	33.7639	40.3599	36.4367	33.4029	32.5391	33.5295	34.1686	33.7216	33.1258	33.014	33.1357	33.0997	36.9806	44.2047	48.1451	44.5542	40.1147	44.1675	47.9369	45.0532	45.9556	38.1628	39.4495	40.2232	49.4411	65.0838	128.507	50.3508	41.2164
HIT 1108	42.5067	2351.17	73.0734	74.1105	131.65	147.491	36.9649	79.9055	590.825	2141.49	417.375	2352.33	43.936	54.4919	57.792	44399.6	49.4555	46.8024	43.0962	43.5358	51.5667	46.0557	54.4295	49.5938	56.3013	42.8986	42.3218	50.4419	70.8817	251.796	57.199	43.2995
HIT 1109	56.554	9752.8	214.912	414.077	200.126	70.6921	49.2429	4350.13	2250.64	7764.07	3262.15	24027.4	5417.23	458.002	6077.92	79966.2	58.2976	54.8834	49.5868	67.8644	62.0363	158.814	60.407	49.6763	147.456	47.3629	83.659	129.94	103.349	715.292	57.3515	134.843
HIT 111	32.404	37.1735	33.2964	33.5504	37.1993	38.341	33.7612	32.9871	33.1876	33.9117	33.5532	33.3605	33.5923	33.7368	33.1685	35.7589	42.8311	40.4264	39.3683	41.1418	41.4683	41.7968	45.9879	38.5746	37.337	36.8648	39.345	36.757	60.2654	42.5596	51.7444	36.7554
HIT 1111	32.535	39.3163	47.519	34.5483	44.2961	37.3146	34.22	33.804	34.2644	36.9504	34.3812	41.3386	34.2904	34.104	34.3657	64.0136	42.9368	60.1201	40.5596	41.2799	41.8745	41.3883	79.492	42.8361	41.2943	51.7372	46.1333	180.107	67.8321	1532.21	51.5961	68.8047
HIT 1113	32.1909	36.0123	37.0746	33.414	39.2105	37.3081	33.4905	32.8252	32.9868	33.2389	33.5006	32.8557	33.7527	33.4106	33.3974	36.7479	44.3993	44.6094	41.8277	42.1874	40.5245	40.18	41.2887	42.87	37.0106	39.0326	39.985	46.6834	61.3448	120.322	49.4506	40.8084
HIT 1118	32.3647	85.0267	33.2985	34.1831	40.0973	37.3096	32.7726	35.3797	44.6573	82.5184	42.9976	74.2481	33.8965	33.4776	32.5735	835.359	47.0802	41.4232	41.2061	42.2319	40.3519	42.8329	42.4139	40.2412	39.3099	40.2501	41.324	39.9226	74.2176	65.5404	50.6809	37.4214
HIT 112	32.0775	36.4315	33.2727	36.3195	39.0331	37.7042	33.6882	34.7016	95.4168	38.4225	34.9335	33.8622	33.2767	35.4994	33.8263	35.3841	48.4354	48.1245	41.5094	41.8805	51.8065	46.7073	42.5535	39.4835	38.5421	37.007	37.2845	36.7516	68.2349	43.8632	53.3778	38.0258
HIT 1123	38.4739	79.0092	132.455	10715.1	163.345	41.053	67.9173	52.3029	133.484	26773.1	20220.1	106.758	53.6852	7687.63	61.812	64.8124	85160.6	9856.48	52064.9	70040.7	1911.65	12235.5	15446.7	15998.5	43519.6	711.902	746.323	20132.6	3311.65	21520	4552.04	42673.7
HIT 1124	32.1538	36.7472	32.8717	33.5193	36.7189	37.2867	33.2483	32.5061	32.9628	33.4062	33.8489	33.4652	33.1688	33.0409	33.2662	35.553	65.3756	45.5739	59.3785	62.9985	40.4608	40.332	43.9136	43.9921	78.9042	38.0373	39.7839	40.5355	62.5394	46.1288	49.3366	54.0939
HIT 1125	32.3449	36.8123	32.8704	36.2802	37.5823	36.4986	33.1249	32.3318	33.325	37.8368	36.1488	33.2005	33.1236	33.6481	32.5831	35.2974	39867.8	3008.12	29812.6	39574.9	125.042	3312.39	4461.42	5664.62	3307.55	42.9022	182.734	2834.02	963.634	2211.06	56.1679	18761.1
HIT 1126	38.5244	142.012	343.115	31500.4	81.9468	40.2611	39.9513	60.431	529.935	37221.3	47857.3	117.149	43.6992	8503.89	122.611	45.2917	13511.7	6340.18	13126.3	18771.6	3264.69	1355.1	2396.11	8044.62	11181.7	1103.42	350.528	14213.8	1712.61	25668.5	7149.41	16617.8
HIT 1127	32.1426	38.3354	33.6202	38.0102	37.2649	39.9709	34.0828	32.7225	33.5896	36.0333	38.35	33.0858	33.2377	33.9298	33.0039	35.0166	86.0627	57.8245	81.2937	86.2065	55.326	54.6978	48.9504	48.0061	41.3774	37.9497	38.4081	38.5037	63.8714	49.8213	52.3349	55.5784
HIT 1128	46.7787	150.898	325.631	23144.5	82.0364	39.241	37.7298	59.1269	248.14	31300.1	31357.6	62.9132	43.3319	12658.9	62.5283	37.5747	22079.9	11397.3	24140.3	25056.6	4196.12	1720.87	3419.74	10961.2	17071.4	1169.67	560.273	31456.9	1284.22	26182.9	7926.82	27644.5
HIT 1129	55.9423	103.841	391.945	15960	207.905	57.91	125.587	64.5591	149.609	29966.2	20336.3	101.56	69.9768	11249.9	74.8525	67.2045	17857.7	6732.97	15765.4	21363.7	3101.16	1740.03	2975.48	8849.62	93228.2	1451.3	367.894	24192.2	1166.53	24415.6	6713.62	12320.4
HIT 113	32.2069	36.4752	32.7879	33.4945	35.2129	37.4937	33.4524	32.9117	33.0926	33.2884	33.8679	33.3305	33.1514	33.3542	34.5291	34.1944	42.6147	40.1489	41.334	40.2527	41.3831	41.8347	40.4121	38.3853	37.5441	36.3814	39.0805	35.4717	56.9251	40.2577	49.5303	36.8436
HIT 1130	31.7198	36.6476	32.7227	33.2327	39.5182	38.3415	33.2234	32.3315	32.6108	33.1073	33.2734	32.9308	33.6475	32.6851	33.0654	35.8362	45.9975	42.1136	42.4431	44.5347	55.1203	42.8772	39.7934	40.8903	2078.9	52.0686	41.1245	38.7026	63.7623	44.4372	56.6997	47.8044
HIT 1131	32.0524	37.6562	33.3579	143.935	38.1547	36.5845	34.2499	32.737	34.0595	254.32	228.212	33.7045	33.4149	34.125	33.4086	35.5779	252.872	44.7678	331.639	46.086	262.272	43.6375	40.9782	41.6997	25276.3	241.238	39.7329	35.8251	68.9037	46.4051	60.3311	55.1979
HIT 1132	35.7878	39.8469	52.4179	151.662	49.6023	37.5218	40.2143	32.6605	34.553	231.331	172.828	35.9172	32.8615	70.7268	33.2953	44.9464	79.5066	54.8746	77.6014	87.1911	60.6161	46.4648	48.8504	58.4701	1795.27	83.3753	43.462	84.3131	67.1821	128.382	76.4996	90.8776
HIT 1133	32.2102	37.0994	32.9402	33.1854	38.1833	37.9282	33.1739	33.5858	33.5108	34.2379	33.6037	34.7874	34.0148	33.5374	33.1372	36.0257	42.26	43.6502	40.969	40.4323	47.4692	39.969	39.9477	40.5793	586.449	46.0295	39.6025	36.3822	58.8585	41.6066	51.2859	56.9534
HIT 1134	33.1223	37.9471	33.7995	99.5924	184.586	38.7322	33.6546	32.7238	33.9865	128.746	152.186	34.2454	33.2006	73.4946	32.4109	38.9008	103.147	75.2239	120.439	124.534	106.877	52.4712	52.2913	70.714	7805.46	181.853	45.7795	193.837	104.853	148.017	77.8231	132.732
HIT 1135	163.35	654.973	2028.77	81844.1	572.293	67.0613	83.0181	165.414	317.548	88106	55062.3	103.438	182.96	106604	135.868	86.2323	52482.8	79778.9	50641.3	108765	38020.1	11907.3	24965.4	95476.7	48173.5	3386.54	2125.24	73728.2	9783.54	111694	48055.9	85668.2
HIT 1136	32.2111	43.3652	33.9455	203.292	42.6786	37.3592	33.8197	32.5712	35.6548	150.592	257.807	34.6848	33.9857	2468.69	33.9222	35.6906	1504.45	385.459	1871.67	5185.31	378.394	53.2482	363.789	535.452	168.766	207.72	66.489	3792.49	160.041	16317.2	5927.66	534.061
HIT 1137	33.0152	78.6325	54.7011	12042	52.7102	39.474	34.6551	42.3565	53.1583	23124	21798.8	50.9657	35.9617	768.24	45.6408	36.6553	774.293	99.6645	1077.5	2715.69	67.5869	46.3712	178.46	90.6775	57.9372	123.506	45.2844	822.527	72.9686	9712.22	3083.41	215.9
HIT 1139	36.5493	103.406	255.745	18065.1	58.9823	38.4856	35.2291	47.7588	605.921	19768.6	30815.3	105.703	34.3749	126.867	130.434	38.1674	145.16	539.672	91.7421	51.537	43.0023	39.766	89.093	2174.8	38.7275	214.552	45.1715	204.783	91.0902	688.121	55.9733	104.366
HIT 114	32.3445	38.6176	34.25	34.0101	38.341	38.4568	33.5596	32.8737	33.8134	32.9671	33.0792	32.4858	33.7156	33.1512	32.1333	35.498	42.3065	49.7869	45.7586	43.1977	43.4268	48.3324	46.2536	42.7671	36.819	36.9739	38.3738	35.2198	62.8235	42.0867	49.0974	36.3638
HIT 1141	41.7761	242.25	180.878	66188.1	489.312	43.8008	51.5663	97.4826	368.222	71430.7	74221.9	97.9223	42.7519	954.257	108.446	192.806	78820.4	3428.29	81029	3611.78	4638.41	305.733	289.9	1478.11	20326.7	1038.46	153.96	10375.8	215.815	6406.49	1562.23	4279.29
HIT 1142	32.3077	36.2158	32.5949	40.2258	36.0446	35.2705	33.7543	32.6844	33.0679	37.9417	41.6914	33.8017	33.0096	33.9494	33.0786	35.3268	50.4264	40.2318	47.7919	39.5936	42.2806	42.0421	39.6669	40.0572	38.552	37.6226	40.1789	36.8744	62.6886	47.4859	57.1053	37.2557
HIT 1143	37.5471	157.284	73.6506	39794	65.0345	37.2416	35.1773	64.1384	84.173	47490.1	53399.8	65.4446	34.1606	71.9142	64.2892	38.107	64802.3	150.792	70717.6	96.5299	3015.89	131.872	44.0171	71.7991	15855.3	785.366	42.6993	47.726	64.9686	48.5807	51.6047	58.126
HIT 1145	32.3343	37.5872	32.4291	33.4544	37.1215	37.4447	33.6897	32.8483	33.9667	33.9059	33.3588	33.3997	35.6205	33.7187	32.9975	34.1118	66.1596	199.437	71.3321	47.6451	47.2496	108.203	194.499	46.1484	74.4181	38.5262	40.5451	132.175	73.7111	76.7717	54.9602	40.8345
HIT 1147	49.3084	132.017	264.766	15453	303.06	44.6404	350.927	68.0778	223.664	36640.2	27409.2	119.098	81.9141	13049	83.6958	60.2839	33471.1	8586.18	25134.2	31477.7	2767.12	4033.04	6066.59	11976.2	32799.5	842.319	457.105	27519.3	1781.77	26747.6	7563.57	28628.1
HIT 1148	32.1824	39.7687	34.6831	35.4162	40.1846	39.2721	36.7156	34.6583	33.5899	36.0756	36.2223	35.4549	33.823	35.0635	36.1594	35.9896	49.6895	45.815	39.8947	42.5535	40.8836	46.2355	43.8191	41.629	38.0874	38.3981	40.5948	37.1305	64.9313	41.8233	54.4485	37.2211
HIT 1149	32.2906	37.6032	34.2255	33.3377	37.8474	37.5656	34.43	32.4782	33.4038	34.1821	34.7283	32.8446	33.6422	34.311	33.5403	33.8673	44.6108	42.6523	41.3277	44.3575	41.516	49.2878	40.3804	39.1425	37.4562	40.6122	41.9854	37.1626	60.6652	484.854	50.3999	37.8491
HIT 115	32.3432	37.317	32.9251	33.6783	37.0255	37.6329	33.5487	32.8013	34.2808	36.6777	33.8302	33.9233	33.8285	33.5432	33.9729	34.722	47.035	48.5894	47.6519	42.9677	50.4519	237.017	50.7926	43.304	38.8656	37.09	38.7311	37.5286	62.7389	44.6282	47.1228	37.8256
HIT 1151	33.2642	38.7605	34.5727	35.4082	36.5883	36.3671	33.4711	32.2469	32.9289	33.5052	35.2307	32.8748	32.9139	68.9362	34.0852	35.6955	61.901	77.9984	88.2458	93.8357	66.6251	45.6423	48.2048	52.0814	65.8063	38.1779	40.5164	71.9042	65.5269	62.9652	70.9059	66.9547
HIT 1153	49.2935	88.391	200.989	11070.5	258.377	47.2246	49.469	52.385	115.509	21638.4	17444.2	70.194	60.6069	25441.1	54.1901	59.4803	17419.5	19829.2	18493.6	34876.8	6164.29	942.792	3009.97	21789.7	15000.3	819.42	514.278	42174.7	1616.21	48440.3	13828.8	27324
HIT 1154	32.251	36.1775	33.8132	33.9069	40.8617	36.2974	33.8131	32.1887	33.0526	33.6018	33.7222	33.1184	33.1283	32.6215	32.791	35.7908	44.9144	41.7689	45.3285	40.2795	39.0999	41.0378	41.5601	38.7493	36.0504	37.8418	40.2922	37.7715	57.799	47.0123	54.8837	36.5982
HIT 1155	32.614	37.6844	33.7693	37.3854	37.6154	36.4741	35.5878	33.328	33.3303	36.7216	37.1884	33.3867	33.8175	35.0562	36.947	35.5469	45.5253	42.8549	44.2387	42.4065	45.5316	40.8367	38.1596	40.2535	37.6945	37.7995	38.7338	39.2339	64.6123	47.1358	54.1899	36.0809
HIT 1157	33.0879	38.047	37.7721	175.806	40.9014	40.5978	37.0088	34.2673	44.8389	260.747	350.073	37.8487	35.1233	39.1258	36.434	35.7369	50.195	53.9425	45.098	47.2698	40.2331	40.9428	42.1819	66.3579	38.8727	53.3026	40.9248	43.1334	65.1762	56.2401	63.1883	41.6628
HIT 1158	33.1317	43.1353	42.8439	1148.94	45.2891	37.2238	35.1844	33.9011	45.856	2705.22	2985.1	38.4026	34.3617	1050.78	36.5512	35.4336	1107.46	668.644	1737.42	1465.91	227.123	106.925	162.099	504.426	1750.38	162.338	67.2979	3522.97	128.523	1164.67	416.352	1688.25
HIT 116	32.1601	35.2689	31.8597	34.0214	36.8811	38.2157	33.6633	32.3104	32.7041	33.9412	34.0435	33.2562	33.4255	33.8258	33.134	35.3816	40.4326	42.0977	40.7541	41.3969	40.8855	133.192	39.8049	38.6908	37.5073	36.5291	38.882	35.3302	72.2557	43.13	53.9031	36.8138
HIT 1160	34.617	45.6428	38.7294	609.998	43.585	38.5334	34.6372	33.779	38.6717	136.111	305.261	36.4961	48.9177	25125.9	36.448	38.3864	4376.57	13813.8	14409.6	28132.9	3211.1	425.054	2427.91	16381	8838.37	784.668	503.536	57243.2	222.768	41006.8	8792.72	27052.8
HIT 1161	40.3702	120.586	85.2582	21418.6	78.6689	40.632	35.3653	54.8987	74.9738	34925.6	31604.7	57.1322	63.5209	42478	56.687	36.6765	12572.1	38595.8	33076.7	68826.4	9345.48	1655.89	8094.97	47706.7	22716.3	1622.91	958.437	74729.6	194.197	76646.4	18802.1	58600.8
HIT 1163	31.5756	35.9205	32.6264	33.0842	38.5164	37.2694	33.5918	32.5685	34.0495	33.3709	32.7337	33.3356	33.2707	33.5292	33.4618	36.1223	2222.81	7523.51	5080.85	3003.8	1626.91	99.0115	1042.26	1281.58	486.345	599.389	428.572	41200.5	364.254	16609.3	1690.67	47.2897
HIT 1166	32.4233	44.8177	35.3596	854.168	59.6366	39.52	34.6485	33.6468	38.4708	788.6	949.292	37.1601	36.3213	7430.09	36.581	43.9943	4238.22	2308.22	5396.42	14055.4	1617.98	97.5357	1077.26	3362.12	1249.13	338.012	165.376	18454.1	224.898	41451.7	14499.5	4217.47
HIT 1167	33.1869	394.492	216.785	61473.3	154.193	39.0957	34.4573	105.551	120.459	83507.7	85602	72.3221	37.262	2583.99	61.5411	41.3677	8315.83	780.119	9782.73	29728.8	410.447	67.1624	1949.41	921.697	357.607	289.7	66.4843	6466.44	149.541	66786.9	18591.5	2026.29
HIT 117	31.989	36.7753	33.6981	33.7554	36.1966	36.5326	32.9407	32.7456	32.5385	34.3363	33.7257	33.571	32.9587	33.8103	32.6245	34.6786	41.4105	40.3122	39.8456	40.906	40.949	908.056	41.8787	38.2539	36.9702	37.3026	38.9142	36.3077	61.8824	42.2052	52.3595	36.0245
HIT 1171	137.431	486.836	1363.36	65108.6	437.943	61.1216	79.4107	133.318	295.945	81923.4	51847	89.2292	157.381	104092	116.511	74.2194	50162.2	78571.9	47617.3	107467	37830.5	11514.6	21971.3	91861.6	47987.5	2872.35	1796.4	79097.2	9586.8	101320	47326.4	84544
HIT 1172	32.7725	36.6306	56.3848	70.8947	39.3837	37.0394	33.8857	32.7875	33.0406	34.3528	42.8954	32.9255	33.2454	766.974	33.1242	35.9709	1455.36	1626.82	634.904	872.338	298.193	123.811	174.419	931.803	2413.39	168.561	44.0554	307.01	357.161	2540.05	373.563	2420.15
HIT 1173	45.2957	49.8598	192.535	410.427	65.5762	37.3145	37.937	33.328	33.734	536.076	542.126	33.9676	35.8817	5538.53	33.9881	36.0406	11523.8	13947.1	5876.77	8302.41	2651.73	674.668	1275.87	6585.28	16734.3	574.639	71.7	6372.59	2193.98	19553.1	2661.74	20291.3
HIT 1175	31.8326	35.7673	33.0376	34.274	36.0168	36.9922	34.5493	33.1574	33.7389	34.5071	34.9033	32.9245	33.0715	50.6108	33.2969	36.1859	57.7612	43.1042	45.5866	45.4034	41.0081	42.8799	41.7097	49.2851	65.6485	38.6744	39.0746	36.2261	65.5781	64.7999	61.9824	73.5725
HIT 1177	32.1278	38.4495	34.3654	41.8413	36.7482	38.4138	38.2254	34.6085	34.904	50.4409	51.9556	34.7116	36.4849	36.5477	34.3647	34.7724	52.6686	55.7004	44.6427	49.4136	49.9188	43.6157	53.8949	44.9898	43.3778	38.2416	41.6362	51.7361	63.9702	47.2932	66.1034	44.2934
HIT 1178	32.5739	37.0774	33.4804	35.2337	37.0874	35.6288	34.2123	32.9721	33.1447	38.0615	35.9283	33.1346	34.2447	33.1238	33.7018	35.222	43.4121	41.5663	41.3497	40.7667	41.7318	40.4063	41.2962	40.5873	35.42	36.0638	38.1866	37.2093	62.0888	44.2353	53.1036	34.8853
HIT 1179	31.9706	37.5076	33.4171	159.375	37.7549	37.5476	33.4444	32.7931	33.7045	487.561	409.209	34.3962	33.416	48.1531	32.385	36.1727	58.7152	43.2514	58.7511	88.3656	47.969	40.3783	41.65	45.997	37.709	46.3887	40.946	78.9127	56.6349	175.564	107.687	39.0242
HIT 118	31.9659	36.4598	32.591	33.2431	36.2166	37.5413	33.2534	32.55	32.7075	33.3812	33.5762	32.5458	33.6316	32.9927	33.2084	35.1328	43.9317	39.887	41.5258	40.65	42.6719	134.906	41.8813	41.4354	37.0914	36.5897	37.5236	36.7311	59.8739	42.5523	50.0497	36.0306
HIT 1181	32.0044	37.4206	33.7812	32.8805	37.8129	36.5453	34.1792	32.6316	33.5044	33.7993	34.6881	33.0671	33.9122	33.5245	33.0912	34.9873	40.362	38.7955	44.973	254.741	48.715	43.3226	39.797	39.4244	51.5204	37.2058	39.6354	36.2	60.3117	41.6441	53.4047	250.035
HIT 1183	32.9479	39.7328	36.9569	78.3645	40.5821	38.1892	35.4406	34.8503	37.1076	121.217	127.358	38.1528	35.7246	83.2437	35.7599	39.4083	107.186	101.294	123.863	154.557	98.5987	939.636	70.8088	94.8108	1950.62	69.8742	77.5343	1073.58	94.4307	153.994	81.1534	159.578
HIT 1184	31.8539	35.9013	32.7048	33.2177	37.2924	36.3458	33.7823	32.719	33.1446	33.4623	33.4188	32.9689	34.0778	33.2932	32.8646	35.5202	55.0753	40.2138	41.2301	42.0689	42.6612	112.818	44.8477	40.3345	61.7204	37.6816	40.8184	37.9342	223.004	43.4762	51.8733	36.1885
HIT 1185	32.8232	38.9794	33.1158	34.4201	37.8615	37.5792	37.7429	33.4391	33.3595	34.945	34.7412	34.2555	34.0531	34.1203	34.8159	35.0676	51.0889	43.8074	45.2209	47.7755	107.225	2070.37	44.5137	40.2771	4691.99	37.7875	41.7226	101.351	79.11	45.1302	50.6174	46.1122
HIT 1189	51.5105	123.219	386.842	21178	217.326	50.6198	89.0264	57.1695	141.032	31844.6	25925.2	81.223	62.9437	10588	75.4112	61.8297	22140.6	8753.12	18487.6	22731.7	3039.66	2051.08	3362.14	10061.3	68018.5	1080.19	334.931	26004.1	1301.38	27492.5	8191.51	14199.1
HIT 119	31.7914	36.3637	32.816	33.3096	37.7205	37.8515	33.1447	33.8878	32.8808	37.8898	34.3284	34.7934	33.2015	33.2087	33.7894	34.5052	42.0933	41.1109	37.9033	45.5226	43.9285	76.3735	41.1649	39.6374	37.8752	37.7468	38.9904	37.9174	56.4482	40.7837	50.1772	36.2812
HIT 1190	32.0791	35.9325	33.2836	34.3016	37.1937	37.2277	34.0195	32.768	33.0257	33.7337	34.1418	33.8473	33.484	33.1164	32.7046	35.5168	44.8516	41.4928	43.614	49.1827	41.1866	44.3044	42.0124	41.4723	49.7493	37.4587	39.9745	38.1524	61.0437	42.5468	49.8421	36.8432
HIT 1193	37.0897	37.9635	33.7267	37.404	37.01	37.379	34.7491	33.1785	33.8466	40.8825	38.1015	35.6147	33.8945	33.7683	33.1866	36.2088	45.2613	39.4877	42.8656	39.9807	40.0411	39.471	40.4948	37.4807	37.8164	35.5008	39.8124	40.2478	61.7301	46.7032	51.0532	36.8053
HIT 1194	34.2381	39.9095	34.1737	114.238	440.919	41.9871	36.0444	33.3413	33.4298	111.77	146.728	35.5861	32.1253	74.7683	34.1979	39.2471	97.7625	66.7182	116.316	115.152	75.0821	43.1775	47.9416	67.6592	3748.37	104.531	44.1812	155.771	103.628	134.657	68.7215	116.652
HIT 1195	224.162	2705.35	931.979	18639.9	102.53	41.9505	61280.5	1348.39	26126.5	6606.24	7945.59	31118.4	25816	8596.56	22416	6895.9	356.773	177.81	331.288	422.582	68.6387	94.7418	111.381	143.394	706.542	101.924	58.9216	724.956	19324.2	757.669	275.11	742.766
HIT 1196	38.0146	309.487	95.3327	6477.16	42.1054	37.6849	27135.7	142.277	1541.53	3304.43	2130.06	5534.12	10367.7	4479.25	6544.26	38.7579	45.7842	43.3055	42.2497	43.1698	43.1561	41.929	42.0709	41.4172	43.0201	37.6406	39.8756	38.6802	60.9946	56.2307	61.4386	36.5588
HIT 1197	186.284	6403.5	2342.18	67395.8	198.913	50.5565	72567.3	1541.62	13053.4	23597.1	26171.3	54402.3	50171.1	24470	46934.7	974.65	48.603	66.6273	43.6337	44.0963	47.2006	47.715	42.6258	48.9566	205.859	54.0182	39.5641	70.0842	507.967	364.315	319.86	41.3282
HIT 1198	136.446	7472.68	1722.68	85581.2	213.695	56.0903	93877.1	67311.9	8667.04	71903.8	83775.6	21656.1	28274	28974.9	66615.8	213.933	44.2223	51.5999	44.8988	94.0065	44.0776	43.8739	42.2196	41.0192	67.3264	58.7915	40.2846	37.0033	74.2257	1268.36	54.2171	36.8084
HIT 1199	20444.7	30137.6	103280	69065.3	341.56	90.9915	87760.7	59212.5	14690.9	84699.4	127632	47556.5	31172	18203.2	85794.5	115516	220.464	630.213	73.5291	1850.43	122.099	44.8356	123.428	319.475	385.732	74.5676	40.8035	255.55	122389	4384.97	819.78	39.8876
HIT 12	32.1898	35.7619	33.3207	33.292	39.7905	36.9709	33.5604	32.4312	32.9601	36.0691	34.3412	34.0244	33.4838	34.0292	33.1271	35.4669	74.1695	49.7376	155.875	81.6265	304.36	554.871	63.6817	55.2129	45.4802	72.2551	63.4401	41.6854	833.405	67.8245	113.971	166.226
HIT 120	33.2608	39.9038	39.7408	35.9508	259.902	40.7538	34.0196	40.5661	33.6381	36.1384	35.6664	56.5545	34.6997	33.5252	33.9875	46.356	43.6123	46.5346	84.0376	43.9357	54.4689	1382.81	58.014	112.436	38.8388	36.8017	38.7329	38.8643	65.939	43.5608	52.1773	36.8876
HIT 1200	72.5971	3233.53	504.061	54610.2	144.58	47.0113	81587.8	46694.5	5758.56	60170.2	53052.3	18779.8	19745.8	19623.3	49870.3	76.8971	46.4986	40.5276	42.7909	68.634	40.6441	41.0918	40.2476	46.8785	54.4755	51.6411	41.6229	38.1147	66.9521	666.063	46.5796	38.6087
HIT 1201	486.033	43344.6	2314.49	102180	355.877	55.5213	74178.7	562.629	3375.27	45181.1	55611	73473.6	67806.3	48007.5	51486.1	77620.3	101.857	78.1169	87.2771	82.3609	58.6793	56.3399	57.7832	72.7345	287.506	144.087	86.9282	114.777	1148.03	1225.88	784.775	92.6111
HIT 1203	250.679	9969.8	4672.52	80232.3	338.199	67.8531	69958.1	1979.64	3672.37	43421.3	35423.6	62050.1	56049.4	41384.2	46117.2	5425	42.5985	43.6632	40.4767	39.2061	39.0313	42.4029	41.7795	44.2803	127.127	67.5772	39.4989	43.6094	102.283	487.395	336.022	37.2823
HIT 1204	118.445	8782.87	569.807	1194.98	112.726	39.5473	25439.5	2407.48	17128.7	4756.57	1377.68	52818	7108.63	3176.6	4279.75	60187.3	92.3203	232.878	42.8954	42.3992	42.1001	48.3128	47.3955	107.932	174.555	38.8862	39.6212	59.4773	158.591	160.591	370.182	37.3258
HIT 1205	165.224	6768.01	818.29	66522	204.571	41.6693	113092	337.83	9179.07	469.592	247.162	41405.9	24205.2	43513.9	47919.8	63998.3	44.8979	49.0059	47.3857	41.1693	43.5743	47.3167	40.8628	45.5324	154.599	62.6337	41.5754	70.5873	65.9827	342.19	449.43	37.1336
HIT 1206	62.9929	4282.26	142.769	80.7099	78.5395	38.1292	8379.83	105.403	11443.5	301.282	41.8599	40446.8	3661.86	312.509	1986.98	40308.8	55.7091	119.434	40.0904	41.5524	41.3688	43.2326	40.9919	71.2384	71.9195	37.6424	39.1045	50.9369	58.7789	99.3199	212.524	36.1639
HIT 1209	114.046	2779.85	1741.22	37441	144.629	51.7288	52615.8	1764.73	13124.6	11349.2	10045.4	34976.1	36739	11905.5	23536.9	369.027	44.5215	47.8395	39.6308	41.3092	39.9403	40.5278	40.13	44.089	143.876	43.2282	38.8362	53.9486	135.899	184.02	177.825	38.4859
HIT 121	32.4476	36.7322	32.8444	33.889	39.3637	39.4116	33.5014	32.7583	32.9493	35.1048	33.3352	33.6721	32.9905	33.6603	33.7335	35.6745	52.736	52.4525	44.2633	49.8344	43.3486	46.3315	62.6058	42.8356	38.0165	36.513	38.1695	35.6271	58.3592	41.1181	49.7742	36.8724
HIT 1213	76.5676	4393.83	793.755	62694.9	127.144	43.2644	58106.2	306.165	3378.22	15829	17860.2	59028.4	48599.2	21297.3	23516.7	60002.1	59.5893	57.7529	58.6027	56.1328	60.4387	55.111	50.1329	50.3736	51.076	44.2322	42.7431	45.178	137.582	118.812	93.8022	44.2748
HIT 1214	32.4258	40.1259	40.8586	90.1792	38.9846	37.1476	363.453	33.6723	52.8763	67.0788	52.9896	82.4832	112.686	75.9057	95.9653	35.7504	45.1545	42.6075	43.5289	45.5428	49.8817	40.7682	46.9497	40.3011	39.7046	37.5879	38.7911	36.6742	65.821	44.1798	52.4537	38.058
HIT 1215	243.647	9837.05	2126.65	42399.8	237.167	57.5957	55967.8	1548.37	7036.72	11894.8	10950.5	56021.5	33957.8	14835.9	22570.9	41082.8	53.8775	45.7619	43.3959	44.4829	43.1466	45.4097	43.5867	42.9975	51.2956	42.297	41.2412	37.0087	71.1375	135.774	106.365	37.1576
HIT 1217	34.14	41.3935	100.026	40.1614	42.2947	37.0136	34.2428	32.4273	32.7217	33.7511	34.296	33.5015	37.8934	33.8178	55.8624	35.5487	40.9613	39.8161	39.9058	39.2582	39.5886	40.9921	39.3276	37.9144	40.2486	38.027	39.1022	35.9096	63.4595	52.1334	59.2771	37.3468
HIT 1218	36.078	196.338	91.1805	41.5084	43.2978	35.9791	313.679	36.0059	389.082	45.2435	33.3093	1566.72	148.6	45.4931	86.4744	1375.18	40.4617	41.9683	51.1283	37.8008	38.938	40.4533	40.2435	41.9203	36.8362	36.2331	38.8442	34.855	55.5609	48.5288	59.8517	35.6076
HIT 122	31.564	36.2398	32.9114	33.9196	38.1771	36.914	32.4859	32.1681	33.4702	33.9601	33.781	32.8589	33.7514	33.3709	33.3684	35.1424	37.9793	38.037	45.6517	39.2818	39.6426	38.601	39.434	40.2537	37.8658	36.7937	38.001	36.1187	54.6229	39.5225	45.2478	35.8788
HIT 1223	19560.3	27009.5	95248.7	60620.5	293.592	84.9722	82805.2	56187.3	15675.2	76822	121301	45860.7	31256.7	17569.2	83515.7	100510	181.72	579.536	70.1736	1621.08	116.11	44.1196	106.992	261.184	320.03	69.0193	40.8222	257.285	103275	3362.62	672.116	38.3648
HIT 1224	103.811	5438.66	810.449	70727.1	206.365	54.7023	81737.4	57431	6774.03	64891.1	70659	19678	23271.6	25661.2	57659.8	93.136	63.5215	54.7884	56.8925	101.832	45.977	44.453	51.385	90.6519	69.7847	70.3344	49.8906	45.1992	69.6878	1275.62	60.2182	51.9822
HIT 1225	400.1	1162.49	550.014	3402.61	131.753	37.2743	95.1259	74278.1	35489.8	36307.1	20183.2	2003.14	5813.39	63816.3	57110.6	40.8578	54.5346	97.0835	61.1967	95.9738	56.586	48.5652	49.0468	50.1009	51.2672	37.9164	45.6494	47.7115	401.338	2838.91	60.69	43.6238
HIT 1226	36.0582	124.355	92.9394	33.6923	35.2716	36.5598	33.8397	20802	8431.52	4679.77	906.874	647.5	113.824	42.0632	10402.7	34.062	43.164	37.9351	41.1952	51.5666	43.2433	40.6097	44.0431	41.3297	39.8292	36.8373	39.4993	35.3035	61.3275	42.9696	56.0447	39.2883
HIT 1227	158.958	2814.88	1844.81	144.93	48.211	41.4262	49.6847	110371	75601.5	26528.1	26320.6	2727.49	315.355	3885.66	111899	41.4688	55.578	53.3555	72.7849	511.193	50.7142	46.389	44.0284	47.8212	116.887	37.7924	42.549	38.0158	66.4583	298.135	54.4315	51.0215
HIT 1228	74.636	2040.24	414.309	8446.96	54.9888	41.9569	22066.5	56547.9	17994.8	46134.1	21604.1	3767.81	9512.93	71722.1	35568.3	47.2339	44.2506	213.353	99.8207	118.313	81.8721	42.0228	41.1676	41.166	49.2885	37.3037	47.8508	39.5899	96.1718	8749.97	59.3202	44.1954
HIT 1229	64.971	2592.87	546.635	7683.9	52.4697	43.066	166.485	82317.5	25901.8	58348.4	23023.5	2630.51	10467.3	83719.9	41499.4	43.5638	47.3645	235.868	121.038	137.119	91.5702	42.6519	42.2678	43.0392	49.0418	37.4354	49.8136	36.3318	102.374	10697.1	62.8832	46.9863
HIT 123	32.5563	38.2883	33.3625	35.5489	37.6733	38.8165	37.6564	35.2476	35.2227	38.1857	35.3989	35.902	34.0376	35.2017	35.6316	36.824	47.2826	44.2199	44.1768	40.9533	41.9403	42.5438	40.1449	43.8898	36.9879	38.1029	41.1024	35.7581	59.2713	42.3292	50.0777	36.549
HIT 1230	107.06	5948.86	1142.72	19391.7	73.5119	47.4327	2396.66	115351	43693.8	73539.7	38336.3	2748.51	12792.3	105737	59353.1	57.685	62.3803	522.784	264.386	303.299	161.027	45.0133	50.4582	89.3861	70.756	49.3588	83.3951	46.4522	124.769	25446.1	81.8516	70.509
HIT 1231	238.982	734.347	204.14	1408.79	102.598	40.7407	71.3251	60962.8	21549.1	52870.6	49957.7	2023.88	3523.9	30158.6	39228.1	41.5227	56.0582	63.759	50.4529	87.4276	51.8278	51.0983	47.7836	49.9745	41.9613	36.697	42.4121	46.931	381.177	2124.2	51.3672	40.6844
HIT 1232	31.9472	35.488	32.8191	33.7507	38.6343	36.6204	33.0926	62.9087	39.255	71.3598	53.5366	36.0421	33.7335	35.3176	42.4647	35.7541	45.4211	43.1995	40.7616	41.0494	43.634	43.7636	39.8035	41.0816	35.3354	36.5888	39.5333	34.9761	62.0124	43.7159	56.0017	36.2227
HIT 1233	41.6519	1392.71	190.86	2841.78	52.8664	41.5632	71.923	52934.7	13146.4	62862.9	50740.9	2364.38	6097.37	48186.8	15584.3	41.7193	43.1898	57.1909	45.4604	70.756	51.5736	41.3452	39.9825	39.8702	37.0899	35.7853	41.094	38.4701	89.65	2449.47	62.8546	37.3607
HIT 1246	38.7274	334.906	74.1591	3338.81	53.7075	39.8686	25568.8	8958.96	1605.16	9552.87	4712.73	3518.17	5108.2	4500.44	4972.97	43.1249	65.8351	55.3862	61.4276	57.6156	48.1009	45.2325	49.6196	86.5642	45.3033	51.366	51.7983	45.5984	71.1653	165.14	58.9773	52.2409
HIT 1249	46.2455	57.3091	373.938	269.022	42.5399	37.76	3106.14	722.131	250.365	547.293	196.57	498.489	917.243	1218.99	719.332	200.532	44.3992	41.1895	41.0274	40.9725	44.4898	45.5259	41.7966	40.8481	38.6882	37.0662	40.5255	36.4671	74.5775	446.943	61.5883	37.8763
HIT 125	32.0264	36.061	32.7191	34.5224	38.9751	38.0859	33.6961	32.7013	33.0807	34.2189	34.3738	32.1287	33.7282	34.0069	33.4244	34.1952	46.2636	46.0995	42.2892	42.4381	42.9935	41.1776	41.2686	38.5561	36.8835	40.9071	49.373	36.7923	54.891	40.7168	50.6603	35.9617
HIT 1250	32.2961	35.7814	41.8889	33.8744	37.1957	37.0699	32.8322	33.1144	32.8141	33.8393	34.3935	34.1412	33.2203	32.8535	33.8705	34.9044	41.7802	39.8814	41.6008	40.9537	39.2059	41.3031	40.5697	40.3624	36.3357	36.3404	37.6743	36.0913	60.343	51.4805	50.8858	36.4061
HIT 1251	44.1339	49.6158	1222.33	40.2541	37.3466	38.1583	39.3991	2201.01	790.718	542.357	129.451	67.1933	42.0331	83.029	946.276	37.0237	45.9973	46.8013	44.3804	45.6702	44.2586	44.8918	45.8573	41.7922	48.7496	37.1679	40.8759	36.2454	73.9495	1464.51	50.7133	37.2154
HIT 1252	42.6064	53.4875	163.965	41.3495	41.092	37.0641	85.7283	48.1722	55.2749	50.8819	39.5594	121.751	221.441	50.6028	43.5619	114.761	47.1383	48.2661	40.8021	41.1995	41.4406	42.0518	42.6354	39.4158	37.6387	38.2034	43.5192	37.0331	62.8997	142.966	53.1118	36.1125
HIT 1253	62.9117	59.8461	464.05	39.1151	46.132	42.1606	34.2914	35.7935	34.42	44.8547	58.9864	48.7675	35.8012	35.7647	34.4188	45.7338	49.8282	45.3708	45.1841	42.9918	46.3564	53.3046	64.2062	41.3818	38.357	38.294	38.9258	37.7138	994.49	513.192	54.7226	37.386
HIT 1254	33.7648	42.5761	324.242	34.9863	38.3468	36.7977	45.2314	33.5223	42.4494	34.4384	35.4927	68.1977	36.1482	34.2581	35.1799	64.7141	41.8754	38.6458	38.2855	40.8533	40.7884	41.2779	39.3783	37.7828	36.8449	36.6702	39.438	36.3727	67.1602	325.007	49.9079	36.089
HIT 126	32.415	38.0366	36.5958	34.5761	141.676	39.2995	33.7296	37.0599	33.6937	36.1969	34.8247	46.5017	33.9209	34.3152	33.4311	41.1059	43.4911	43.9476	111.625	40.8272	45.854	788.791	51.7221	143.775	37.5858	37.7999	39.9677	39.5171	163.784	52.518	56.6348	38.645
HIT 1261	43.08	48.8046	81.5049	191.116	44.0829	37.5275	1947.86	496.444	162.854	369.878	129.369	419.676	643.295	552.064	460.013	155.782	46.5203	43.6163	43.9398	42.8674	45.8434	41.9395	39.9854	39.9567	40.3031	39.675	41.4093	37.6408	75.2969	82.5609	52.3207	41.7209
HIT 1262	32.5504	37.3791	33.2396	33.5945	37.0871	36.7165	33.522	34.0792	33.5624	34.3095	32.9912	33.1631	33.0939	33.0922	34.016	35.0457	43.6094	40.1308	38.4887	43.5365	40.3786	39.269	39.5468	39.375	37.1114	34.8719	39.4347	36.406	58.5585	41.7352	53.2466	36.3132
HIT 1263	40.6792	52.1266	56.6635	41.9003	42.4766	42.0491	42.4958	964.219	380.492	257.346	79.4707	58.5154	40.1163	44.3959	383.984	43.3085	73.0438	60.1552	56.2081	54.5143	56.5681	62.4563	56.7155	56.4148	106.754	40.619	44.5008	42.8176	72.4791	52.193	54.9187	50.3422
HIT 1267	235.641	930.093	999.825	5321.24	108.908	44.3908	49148.2	1676.98	25129.9	3043.66	2249.49	22052	12801.4	5092.45	12255.3	8512.77	516.287	191.395	441.426	602.421	67.176	126.835	139.39	166.056	543.909	106.807	66.8288	593.579	34579.1	1266.27	163.48	678.991
HIT 1268	32.765	38.0041	33.5144	33.7734	43.4718	53.6186	33.7239	32.5705	33.0079	34.0231	33.5683	34.3367	54.3034	33.6835	33.8171	37.1694	54.4134	52.3056	43.9651	51.7031	51.8435	43.9838	61.3769	43.825	92.6436	40.5164	42.1495	38.0861	265.91	51.5535	57.0609	39.2883
HIT 1269	134.667	4190.92	420.703	4307.03	151.882	40.5054	32202.7	894.879	7427.75	2534	996.52	34771.1	11331.7	2302.33	5392.3	64064.3	46.2001	44.8219	45.0279	110.095	43.9309	45.5645	44.8765	40.5656	56.5028	37.8816	40.6912	115.65	15344.6	609.915	69.9073	37.0959
HIT 127	39.2496	39.4786	38.6733	54.9086	191.192	38.8083	37.738	85.4547	35.5739	82.19	89.748	36.7667	35.4158	54.7101	35.4026	38.2732	3427.26	810.165	201.17	403.479	4596.17	487.331	79.5768	3177.1	413.74	619.726	71290.5	422.996	974.712	95.0706	943.473	6659.92
HIT 1273	48.9025	108.245	93.4742	152.321	44.8497	38.9599	12882.7	1123.77	8586.97	1362.82	455.18	2587.63	1063.65	1992.82	1213.66	126.578	184.867	116.88	103.012	89.9695	57.6763	104.451	85.2984	105.101	95.859	78.9266	52.0008	214.61	1527.66	178.82	68.6865	392.456
HIT 1274	32.5847	37.0299	33.1894	33.419	47.7146	63.317	33.1416	32.4874	33.0843	33.9676	33.3336	33.9345	53.0336	32.5608	33.5451	35.5817	49.8809	48.5235	42.1081	49.4015	51.3859	46.8025	60.5523	42.7365	81.2164	41.0194	42.7515	37.1493	68.3655	43.7221	56.3093	36.8765
HIT 128	32.0344	39.6503	32.9459	35.6155	36.6035	36.0052	35.0158	32.7655	33.6237	33.2462	33.8093	33.2683	33.9377	33.8447	34.2384	36.2875	41.1168	39.0262	38.7962	40.7057	39.1477	38.3468	37.9611	36.7892	37.4139	35.7128	39.0882	36.0683	58.0019	40.8921	50.5402	36.3021
HIT 1285	123.218	299.189	83.6072	350.555	60.3849	37.7022	61.7056	25698.5	7530.96	34771	17355.5	1137.06	2214.29	25115.9	9983.5	37.6863	56.0456	61.3978	49.5692	51.3348	45.7786	45.3269	46.5373	48.4006	41.2939	38.0323	39.8478	50.7708	171.173	608.013	51.6803	40.1209
HIT 1286	32.0297	37.3921	32.6207	34.2404	36.8289	36.5103	33.9856	32.8959	33.2577	40.1643	35.1949	33.8128	33.4676	36.2385	33.5753	35.1129	45.2245	44.4776	40.735	43.2116	42.475	40.7927	41.2168	40.0245	37.319	36.8809	39.1739	36.9221	60.6897	41.8872	50.5568	36.0718
HIT 1287	71.417	1532.07	432.37	11699.4	47.5641	39.2906	52.9352	43999.5	14752.3	56280.7	19744.6	2543.16	1349.57	89213.8	15914.3	44.777	55.864	532.297	245.255	92.9457	139.078	43.5332	41.7857	45.8886	51.2456	37.152	65.632	89.0489	266.62	22507.2	98.6504	46.5666
HIT 1289	35.8089	42.6319	46.795	68.623	41.9265	37.6063	310.447	35.0945	47.4803	35.1077	34.6819	53.2643	51.0968	58.5623	63.2822	68.3443	42.1093	41.6919	42.9908	39.2399	39.35	43.5497	44.3701	39.1468	36.6538	37.6705	38.7417	35.6796	58.6746	42.6162	49.1559	36.6774
HIT 129	32.366	37.7347	32.5693	33.3235	36.3009	37.2291	33.7363	227.06	32.9318	33.6224	33.5013	33.633	33.5873	33.4075	32.5518	34.2319	38.9168	38.2696	44.0075	67.0724	48.4365	40.2636	39.4784	39.8826	37.9543	38.7104	141.01	37.9706	107.899	85.0672	59.6781	53.0354
HIT 1295	51.7484	40.0395	43.0609	38.3563	98.9787	41.717	34.7601	33.19	34.0366	37.4954	33.39	35.4007	34.1853	33.9691	33.7402	38.5133	47.1019	50.8274	50.726	42.8527	41.6668	42.287	43.288	41.5663	38.4218	37.7989	39.1223	37.5289	69.2804	42.7823	50.633	37.6661
HIT 1296	65.7533	2615.18	467.865	7801.75	52.1251	42.0516	3508.55	76352	20149.2	58939.6	23260.5	2595.01	9457.9	92989.1	42992.1	47.4993	68.5129	261.697	145.851	154.381	95.0285	46.1508	53.2928	104.242	56.4995	46.9328	64.888	46.9533	105.327	12095	69.2228	65.2593
HIT 13	34.7803	39.2239	34.834	36.8865	89.3502	37.5194	34.2663	45.7154	33.7491	38.0574	39.9496	33.5713	33.7704	35.7227	34.0435	35.8045	7067.77	16858.1	1053.53	10189.5	25158.8	3234.02	830.41	4498.03	714.619	4012.27	1603.19	83.0573	16676.4	142.535	20692.1	6424.05
HIT 130	32.2393	39.4598	33.2827	33.8656	37.7987	37.6657	33.8126	32.4452	32.9233	34.2393	34.2461	33.5184	33.8209	33.0041	33.3163	35.5029	42.1437	41.5875	39.4282	41.1072	43.3299	41.0761	42.5883	42.5802	37.8356	36.7798	41.1783	37.4369	60.6878	44.5185	52.8613	36.5145
HIT 1301	34.5744	148.792	50.4673	1651.23	42.2465	37.4465	19381.2	43.8868	666.537	51.0428	39.7865	1328.34	1131.69	1315.65	1436.91	2112.91	43.5355	39.5396	40.3112	39.4996	41.1328	43.804	42.0328	43.5909	39.1806	37.9047	39.3539	38.2101	55.9582	58.2775	56.1768	37.5624
HIT 1302	35.2875	44.6331	42.2652	44.3469	39.2219	36.8133	2462.8	343.025	121.224	270.847	75.5849	248.781	189.737	495.507	282.362	42.5082	45.615	41.2143	42.6335	43.5867	41.3324	42.5128	41.6979	38.8032	38.1001	39.5928	38.8343	37.9877	63.3927	80.8683	57.2401	36.2743
HIT 1303	34.2732	35.2909	32.9435	34.8933	38.5531	34.5379	42.1663	34.5756	34.579	36.8214	34.6517	35.7179	36.8371	36.3632	35.9615	37.3291	50.0007	48.812	39.519	44.9256	43.9894	50.387	48.8562	44.6981	39.9217	37.7725	48.2117	37.9337	68.5497	48.295	63.241	41.4328
HIT 1304	32.0011	36.0134	32.6255	33.4809	36.4903	36.0327	34.4753	32.8445	32.906	33.2691	34.017	32.6726	33.0652	33.4969	32.7923	35.7435	39.6356	38.8809	41.7722	40.2009	40.9561	39.5854	38.5557	38.8251	36.97	38.2706	40.5838	35.637	57.8485	42.2471	48.7452	35.4361
HIT 1305	36.2582	49.7032	37.9183	45.1353	36.9306	39.142	64.532	59.4618	49.098	63.6166	53.976	51.43	46.4149	60.0374	53.3932	49.5445	65.1251	57.5385	97.1391	57.0225	49.6021	77.6741	52.0046	51.8209	43.5764	36.6484	40.5569	49.4497	64.9429	56.8384	81.8553	41.4886
HIT 1307	46.3141	58.8972	187.847	60.0347	44.5498	40.5036	40.6013	35.1879	35.9712	39.0082	37.5182	37.2349	36.5957	36.8997	34.8951	40.9692	51.4612	48.3472	49.371	50.913	152.004	52.968	48.1696	45.3132	40.451	40.2678	41.2273	42.5521	381.804	47.3034	56.8799	41.2197
HIT 1309	36.5993	42.5137	49.3352	76.0655	39.5719	36.7768	419.315	163.284	83.912	236.952	123.019	160.216	158.9	171.187	128.812	78.3744	42.9277	37.3162	37.1948	37.4434	40.7318	38.9131	38.893	38.027	38.0246	38.1753	38.3983	35.5942	60.3573	54.9067	46.8362	34.8956
HIT 131	31.7574	35.8752	32.9208	33.1788	36.6396	36.0681	33.6943	32.4436	33.2748	35.6805	33.2032	34.2467	32.6357	33.3087	33.5531	35.5576	46.9279	55.4549	40.1784	39.2648	37.9003	40.7418	36.3599	41.5879	37.821	35.2615	39.1098	35.7856	56.2123	42.4095	50.3253	35.7151
HIT 1310	32.1257	35.097	32.7533	33.6766	37.0003	37.3212	32.9251	32.5733	33.5118	34.6742	33.1986	33.6843	33.2367	32.6083	33.4	35.8963	43.9391	39.305	38.8208	38.8479	40.0265	39.1495	38.5046	37.593	37.4459	36.6684	38.71	36.6422	66.5345	46.6636	51.482	35.3673
HIT 1311	34.9105	52.6072	42.0658	36.2361	39.3595	38.0958	37.3052	60.2776	55.0332	56.377	40.9237	167.135	38.6329	45.8823	51.7175	545.39	53.6228	49.366	54.1057	48.4285	47.4281	47.9777	48.1944	46.4141	47.2127	39.0044	40.8902	38.3027	68.1889	49.8772	59.8009	39.8416
HIT 1312	32.0465	40.8573	33.3926	33.9977	38.9881	37.0521	46.9964	34.8234	49.2455	37.9662	33.6021	100.978	36.8766	35.6309	37.0641	98.1339	42.5011	43.1027	40.4161	42.5846	42.9174	39.6087	37.7737	38.0878	36.0403	36.7797	41.0624	35.1158	53.8842	41.8098	50.03	34.2269
HIT 1314	35.7132	170.844	72.1705	39.6209	41.2558	36.249	329.459	36.7328	366.086	45.1885	34.0704	1522.92	145.429	43.6017	83.4834	1249.34	48.7561	45.3488	40.8642	41.7691	38.8396	40.3259	41.7422	42.3779	40.956	36.3406	38.9352	37.0073	61.4269	44.8261	51.9677	36.7393
HIT 132	68.4482	37.8793	35.2374	41.7469	13799.7	57.7208	34.0948	36.1963	33.3375	34.7756	34.7667	34.0775	33.499	34.1141	33.6697	45.2982	65.0491	57.0562	41.9614	42.8567	74.3594	45.4999	85.9862	171.708	38.2719	36.9792	105.083	38.8985	126.251	45.4283	52.4665	52.3893
HIT 1321	34.3429	37.0286	37.2739	35.0156	38.2002	37.3179	34.7285	33.4272	33.7124	34.8147	34.5305	34.0541	33.8701	33.4488	33.0506	36.8976	45.3531	39.6774	41.4591	42.8493	42.1237	42.9236	43.5325	39.9972	37.1752	36.94	38.5968	37.0292	61.7974	44.9007	57.8531	36.5311
HIT 1322	31.8751	37.7347	36.001	33.2158	35.798	36.7615	33.9437	31.4885	34.2629	34.2717	34.3296	33.4432	33.0947	34.0876	33.6905	35.7441	48.2849	45.1171	41.2315	43.7606	41.9518	41.9018	43.1359	42.8239	39.6	38.8808	37.9458	35.0071	65.6798	42.0549	49.8752	37.1014
HIT 1323	40.6938	41.0694	66.8004	41.4959	40.1783	38.453	34.8469	33.3817	33.8316	34.5492	34.3087	34.3645	34.3241	33.8717	33.691	34.2932	47.1241	42.978	40.8014	42.6886	49.0828	40.5795	45.677	44.9272	39.2752	37.707	39.6084	34.5297	86.5348	49.8228	156.335	36.3672
HIT 1325	42.052	415.318	86.9942	5931.19	58.1664	38.5041	39234.4	75.4839	2017.92	106.141	69.664	4358.2	2769.36	4320.61	5208.73	6709.23	42.0873	39.5489	43.6518	40.4407	46.3691	44.686	42.5008	41.2346	42.56	39.8982	39.1651	39.097	67.7878	62.9711	71.871	36.8351
HIT 1326	34.4228	108.584	44.764	1053.86	42.1318	38.6977	13004.1	1998.96	572.21	2165.69	1141.19	1793.95	2068.34	635.996	1821.23	200.698	50.4455	49.5405	45.7803	42.0247	43.8638	46.3826	44.1285	44.3737	37.3266	36.7821	40.3904	36.3698	57.4304	54.7928	50.1708	37.6677
HIT 1328	32.2723	36.6909	33.8332	33.5966	38.369	36.3297	33.5446	32.5181	32.5171	32.8814	33.5295	32.8511	36.5149	33.4269	32.5682	35.1552	44.5533	43.9428	39.8813	43.4462	41.8971	43.8262	41.9059	40.4233	37.1787	37.241	42.994	38.8444	66.4198	44.767	51.7441	36.4807
HIT 1329	40.8759	43.5161	58.1142	41.0328	41.2279	42.2794	43.2386	37.7382	37.7581	42.0065	40.0555	37.5739	38.1591	40.146	37.5945	37.9666	62.6332	59.1271	49.8463	54.6582	51.6721	48.7849	51.1343	49.3073	41.3397	38.2424	41.9948	38.8352	78.9579	54.1177	55.4574	41.3683
HIT 133	40.9426	38.0797	41.8549	48.432	296.976	40.0788	34.3793	109.369	33.7909	52.6591	52.5254	35.0252	33.473	38.402	36.2558	35.9944	3641.14	1589.69	86.4272	214.155	4365.45	199.464	90.8206	4171.52	245.525	1178.65	9075.77	115.354	978.734	66.7538	391.906	3535.11
HIT 1337	34.8962	180.992	57.9825	3078.77	44.6282	38.5478	21343.3	43.7904	846.561	59.1551	44.0516	1501.44	1340.59	1528.27	2357.3	2924.4	43.5103	38.5112	43.8402	40.5829	43.5786	52.3198	38.5979	39.0942	39.0928	38.7864	38.3309	38.3772	72.917	52.2744	55.6258	35.5899
HIT 134	32.151	38.3749	33.5492	33.6453	37.99	38.2174	33.7786	32.8635	33.1627	34.6198	33.8375	33.5581	33.4139	33.4996	33.0685	36.7117	44.0189	40.7885	41.4079	42.7332	39.7709	41.8611	41.9753	40.4522	38.4592	36.9512	38.6631	36.7124	58.6875	47.536	57.6478	36.8614
HIT 1340	32.0169	40.0933	33.0288	76.7238	36.3991	36.3419	503.498	34.4066	59.8556	77.8815	58.9717	124.369	134.058	84.5101	71.8214	35.2419	41.0906	37.4522	41.2168	39.8164	43.7861	41.637	39.699	41.002	36.2365	36.9257	40.5369	34.4968	64.006	42.7924	51.3807	36.3668
HIT 1341	38.9294	171.412	95.8645	1487.24	45.0685	37.4698	17078.4	173.467	2739.38	973.161	340.585	4228.89	3927.06	708.973	1676.62	1162.63	44.3218	43.0363	41.582	42.0992	41.8749	39.5442	38.1319	39.3287	44.4407	37.3367	37.9618	37.7279	65.0311	48.2992	58.7837	34.7
HIT 1345	562.599	57.764	92.4339	49.5274	60.1835	38.8571	35.1851	36.9833	34.9772	36.8036	37.5581	32.909	34.4215	47.1197	36.8766	35.3989	44.2616	44.4003	41.2894	43.8108	42.525	42.7411	44.5998	39.2113	36.7783	38.7206	40.5262	37.9797	91.3555	43.8184	55.3758	36.7557
HIT 1346	32.2378	37.1514	33.3717	33.3411	37.5772	35.7359	33.362	33.1668	33.9369	33.8188	34.1934	32.9138	34.7773	38.8716	33.332	34.7225	47.8744	41.8301	38.8421	42.037	44.4971	41.1825	46.2907	42.2643	35.4276	37.078	39.9372	35.6885	62.6504	42.5927	52.2269	36.8043
HIT 1347	54.0474	44.8143	42.1268	42.2117	41.7326	38.3862	43.5626	37.0711	37.3207	39.8936	38.7	35.6907	37.4833	40.1939	36.9019	37.3758	57.5295	50.1627	50.5076	73.8989	46.8521	47.4688	44.9208	44.7743	38.1242	40.0629	46.9013	37.8667	141.627	112.032	58.5341	39.5223
HIT 135	33.2726	42.2	34.0559	35.6486	40.8464	36.8634	37.0391	35.3755	34.3195	36.8421	35.3666	35.0756	34.3443	37.8317	34.1223	36.5879	45.7534	46.3038	44.1143	43.1815	42.0892	46.7194	40.4418	38.4663	39.615	37.7338	39.8268	36.87	72.7096	66.1027	63.5764	38.2634
HIT 1351	372.453	748.891	290.064	3474.81	133.795	42.1681	99.7383	64297.1	21372.1	42398.8	27383.7	1956.16	6933.63	59305.4	40822.5	43.0716	60.252	98.2036	65.0674	69.3962	55.7752	46.0529	49.1354	52.886	44.1902	39.1483	41.8688	47.2161	449.121	3023.56	58.71	44.5155
HIT 1352	32.8315	41.1458	33.5986	46.7982	36.9569	36.4442	37.487	80.8478	39.4235	332.594	101.441	47.5184	160.366	720.167	39.4581	35.8571	43.2871	41.2821	40.3847	40.3239	39.3461	40.5199	40.3958	41.7501	37.2317	37.2525	37.7775	36.1562	60.3142	52.2619	51.1861	36.188
HIT 1353	38.6126	929.639	185.518	3862.1	40.5792	37.457	90.3877	8991.42	1071.16	40697.5	10867.1	1613.95	19340.5	58899.2	740.708	39.5414	50.2631	181.116	94.2428	45.118	65.5784	44.4591	46.0616	43.0142	40.6656	36.7683	45.3766	42.2731	118.369	3555.85	60.8877	37.2964
HIT 1355	43.5323	66.301	37.9079	39.7459	39.8328	38.9033	47.0873	39.1925	35.5993	44.4539	39.4688	37.986	38.6172	43.027	39.3083	37.8569	51.2515	47.8927	45.583	47.8504	45.1885	46.6344	44.8213	44.3176	38.8448	36.7275	38.1175	39.3996	90.1285	53.1385	50.2153	38.1899
HIT 1356	76.4336	3388.39	473.632	50622.8	139.505	49.1432	74891.6	47125.6	6739.88	54764.1	49749	16711.1	21293.4	20571.1	50875.2	65.4423	80.9376	63.727	68.8708	92.3383	52.0759	47.2868	62.0279	106.389	61.8467	61.6196	53.2484	44.8943	61.6255	829.785	80.644	55.2441
HIT 1357	38.6823	52.2412	116.056	44.7757	101.507	98.0856	77.2116	50.2008	264.381	34764.5	45.9837	112.773	37.1184	38.857	69.4888	7523.34	44.321	43.0489	41.5058	40.6269	44.1314	48.6401	40.5387	44.7108	71.0296	39.7222	42.2322	38.833	69.607	48.8358	53.8503	40.8795
HIT 1358	32.2859	36.0179	33.3136	34.7938	39.954	36.1213	35.7867	33.8795	40.5126	1156.85	37.8728	36.2007	34.0045	34.0038	33.6163	199.732	40.4357	39.124	38.5877	40.3129	40.315	39.8218	38.3327	39.4348	37.9709	36.7331	41.3452	37.1555	61.6978	39.8164	51.5836	35.2771
HIT 1359	31.9327	36.2696	32.4792	33.3842	36.6631	35.8177	33.2076	31.7862	36.9259	609.54	33.36	35.842	32.3967	32.8104	32.4868	155.974	40.9973	37.572	38.3891	42.6262	40.1838	44.5368	37.6837	41.4703	36.6714	36.1699	40.8481	36.8492	59.7061	42.7836	52.1865	35.9717
HIT 136	31.9528	36.5834	33.0122	33.0011	36.7781	35.8178	32.9957	33.9282	33.1405	34.2239	32.9864	32.9687	35.5964	33.5911	32.8967	35.7814	47.6126	44.8087	39.2917	45.2786	46.878	42.6339	51.968	41.9061	40.676	37.1325	39.8892	37.2415	68.5791	45.1481	54.7463	37.2741
HIT 1360	240.374	164.327	921.779	66.5754	515.138	40.6241	370.572	34.6685	53.3624	2896.21	43.1521	44.5663	34.0622	34.4009	34.1943	685.112	55.6732	38.0994	38.3256	44.0582	43.0744	43.7218	41.4871	39.4656	38.545	36.1748	39.5272	36.8239	62.4505	47.9263	60.5858	35.6735
HIT 1361	36.4771	68.1745	61.9352	66.0916	45.4747	50.7728	371.684	147.871	80.6014	1030.94	119.948	162.019	127.256	56.33	81.6258	196.031	66.5928	69.5228	63.3513	51.7095	54.864	58.4328	57.399	53.1261	41.5277	41.4217	43.1221	41.6443	74.3468	44.9252	54.6372	45.9177
HIT 1362	131.116	85.2659	615.311	91.8716	337.132	39.3502	426.341	34.9276	52.7648	2793.99	38.5657	52.004	36.5752	34.8919	37.7516	484.239	61.8636	46.4174	44.8123	54.0224	54.0999	42.564	60.4359	40.5142	40.0469	37.9675	39.8682	36.8937	65.4167	42.3675	50.3871	37.1392
HIT 1363	2433.51	1817.88	15075.5	1070.82	6734.3	69.4489	5898.3	36.8685	79.7309	245.335	59.9102	50.5103	39.6026	66.9473	41.7433	40.8274	804.231	43.1907	44.1334	290.084	55.2243	42.183	47.4216	41.7207	40.2643	39.2067	40.5682	41.0823	147.313	47.7135	51.8239	38.4663
HIT 1364	184.038	151.452	1096.36	125.48	514.368	42.5055	490.08	33.5049	38.1605	52.8728	46.0583	35.7548	37.6152	37.1431	35.4615	35.3763	87.3279	56.9536	52.6382	62.8654	54.9832	50.6861	60.728	49.8715	41.7562	38.4538	42.1385	40.2997	65.2707	44.7398	48.2028	39.1249
HIT 1365	435.202	360.244	3247.23	333.869	1658.41	58.3504	1328.19	33.6054	42.9604	78.4279	46.5526	35.7327	35.7088	38.0498	35.9272	46.5197	174.982	41.4626	39.0338	89.4858	40.9055	42.2213	41.6941	40.2953	37.36	37.0036	40.0205	36.7383	72.5744	42.0834	49.1442	37.0946
HIT 1366	39.7095	47.2469	63.7043	41.2284	56.259	41.1108	47.1125	34.6824	36.6985	144.218	42.511	37.5046	34.7839	37.3489	35.4917	57.8557	51.8287	45.7792	46.1705	45.2018	42.3892	47.036	45.3479	42.699	42.1201	38.8451	41.9515	43.3041	68.0504	50.7061	57.2701	40.6194
HIT 1367	2785.75	1510.89	17853.1	1707.33	7642.99	207.667	6958.33	47.7218	83.1026	903.023	123.805	184.818	86.3343	64.2073	209.395	92.8761	596.929	62.8784	51.6098	247.591	61.5331	49.7869	57.805	50.5917	39.4704	41.1553	44.0534	40.5445	150.943	74.7396	57.8289	41.8482
HIT 1368	2199.9	1102.09	14628.9	1218.57	6059.62	101.426	5545.34	43.9534	261.777	34301.3	96.6493	150.709	59.1745	54.3047	58.1169	7181.76	463.889	49.7454	43.2451	199.395	45.9658	41.6077	51.9433	42.951	36.3391	40.1999	39.8164	38.3499	132.462	43.3756	52.9443	35.389
HIT 1369	58.1799	60.1732	183.931	59.5646	227.322	41.788	119.673	59.2571	210.663	29626.3	53.1314	194.237	36.5986	43.497	93.9764	5813	52.0579	45.1569	47.0818	43.2313	39.91	46.1957	40.1733	39.087	86.5557	38.9314	41.6102	41.8022	66.948	48.1342	51.7492	41.8067
HIT 137	32.9257	39.1684	34.2042	33.8773	50.0077	38.4956	33.1087	33.4206	32.8523	36.3736	34.0506	33.7763	33.7855	33.3966	32.3712	35.0748	49.75	39.7594	39.7511	40.9515	39.3783	97.0571	45.309	1809.29	36.8839	35.8318	37.6548	35.947	63.1868	42.3665	47.4202	36.3716
HIT 1370	32.5075	41.9248	33.2031	33.9599	36.8584	37.0405	33.433	32.5784	33.0536	34.2651	34.4871	34.1958	32.78	33.9665	33.4317	35.2955	47.3807	44.1022	41.021	39.825	38.9783	40.8531	39.4516	43.2932	37.577	39.6634	40.7004	37.4422	73.0946	45.9318	53.5254	38.8486
HIT 1371	31.8977	36.8164	33.2383	33.9054	38.7774	36.6372	33.4802	32.0069	32.3955	35.7689	36.812	33.9674	32.9661	33.9691	32.7066	34.956	42.83	39.6283	39.1546	40.2161	42.758	42.6039	39.6311	40.0756	35.6758	36.4147	40.6876	37.9432	63.8536	44.9973	50.5082	34.9071
HIT 1372	31.9923	37.3386	33.7425	32.8908	38.9155	37.8297	33.6873	33.8199	33.0783	34.2432	33.7494	34.0606	33.9152	32.9491	33.8141	35.5719	41.5436	39.8715	38.0804	39.7445	40.2126	41.2433	39.4857	39.1205	37.7151	37.1346	40.1521	36.3675	61.1712	42.6582	50.7639	36.3515
HIT 1373	32.3316	36.7526	33.2601	34.2994	66.04	37.8594	33.2743	32.4645	32.9829	34.6517	33.7323	33.6018	33.14	33.7953	33.3627	35.9959	47.6492	40.0364	41.9437	41.5742	46.6541	46.1014	44.0315	40.9003	39.0109	36.7054	38.7767	37.6175	60.5503	40.7856	47.8991	37.1877
HIT 1374	32.7519	41.4395	34.1771	43.225	39.136	38.8059	34.093	33.0953	34.4103	51.5791	54.5945	35.669	34.1948	41.3381	33.9531	36.1324	59.3003	51.2307	63.5397	59.8227	45.1813	45.9118	44.4045	48.2443	47.127	41.0263	43.1312	67.2745	96.1804	56.3727	56.5677	46.7069
HIT 1375	47.2039	44.9771	88.0178	37.853	71.6315	44.3631	77.0943	60.567	66.8437	6458.69	37.0728	1181.26	34.34	36.8554	502.99	129.338	45.148	41.2602	39.5309	40.859	40.3405	39.8018	38.5518	37.4852	37.9588	37.2813	40.5779	36.2876	66.9506	45.7167	52.3448	37.3546
HIT 1376	31.8726	36.9536	33.4536	33.4378	38.5303	38.9562	33.4847	33.6842	34.2449	39.0612	33.8757	33.655	34.1336	34.0515	33.6743	34.6856	50.7265	46.8629	45.1359	42.8893	44.3768	46.8432	43.3169	39.5093	39.326	37.2311	39.6369	35.9636	63.52	42.044	51.0255	38.1802
HIT 1377	33.4052	40.6752	38.2771	36.155	42.4447	41.1267	40.4093	36.0251	37.3675	517.103	37.2968	75.8245	36.4408	37.5787	55.0371	38.7987	49.3523	45.4478	42.7617	41.6615	48.7738	53.2978	45.2598	42.5682	39.7402	38.1279	40.2096	36.1741	64.2491	46.0635	49.7531	41.8243
HIT 1378	31.884	35.5228	32.723	33.9245	36.9589	36.9909	32.9062	32.7178	33.2105	33.1101	33.6888	32.8187	32.9598	33.3368	32.9251	35.4434	47.2963	42.937	38.3127	37.6513	36.2941	38.1427	41.1517	39.4695	37.0454	37.8776	41.9927	35.8967	70.9253	47.2007	52.6255	36.5607
HIT 1379	32.4466	39.1547	33.4853	33.3754	36.8034	37.6485	34.4748	32.9264	32.7078	34.1613	33.9372	33.3513	33.5199	34.2942	32.7608	34.8892	45.856	37.6454	41.5151	41.1867	46.4052	42.0701	42.2398	40.2819	38.2192	38.0321	38.9007	36.4816	64.8574	44.3773	50.0103	37.5315
HIT 138	32.4516	36.3087	33.7325	35.4358	72.4476	36.7107	34.952	33.2015	34.9923	36.3085	35.573	34.4546	33.7229	33.2842	32.9538	37.3443	57.5206	55.0812	48.3218	43.0129	44.2048	69.7817	47.3931	64.5574	39.772	35.2862	40.0725	37.8338	64.7114	43.9424	53.219	37.6476
HIT 1380	31.977	35.5932	32.8278	40.3745	44.5541	37.44	34.2033	32.4795	32.1238	42.6607	52.4714	32.6636	32.2496	38.6931	33.5888	36.8688	46.7246	42.8753	57.5674	57.8054	41.4886	41.5096	41.3405	42.5018	48.2183	47.4551	40.1324	57.9468	87.9982	54.3065	55.6365	45.2863
HIT 1381	31.6811	35.4904	32.5584	33.551	37.3135	37.6181	33.5069	32.5718	33.241	35.2231	34.052	34.0389	32.2715	34.3862	33.0597	35.3718	43.2463	42.5224	40.4467	40.2013	45.0926	43.2638	39.3992	39.6143	37.6317	37.3693	37.4175	34.6687	58.1708	43.1194	58.1895	37.4615
HIT 1382	32.6787	37.9492	32.7726	33.9247	36.1042	34.9756	33.7701	32.4168	32.636	37.014	33.9388	34.8257	33.1249	32.8892	32.4731	35.4756	40.0184	40.3242	37.1487	43.0961	41.5638	44.4242	39.3912	37.3794	37.2999	36.8437	38.6879	35.2135	55.9373	41.9513	50.3783	34.9344
HIT 1383	31.9935	35.7825	32.633	33.2369	38.7257	36.4388	32.9647	32.7437	32.5742	44.9621	33.2205	38.6306	33.8729	33.5032	32.9383	34.715	44.5553	40.1029	40.3123	41.5045	43.4899	45.8322	46.4288	40.4317	38.0674	36.1686	37.9758	36.1016	60.4378	42.0031	48.7987	36.6416
HIT 1384	32.4761	36.8823	38.3749	35.1953	38.8213	35.3069	47.3349	36.3144	34.4663	37.5929	37.1381	34.9658	35.6427	39.6576	37.0675	36.9825	42.1906	42.8448	39.8585	38.976	38.8095	40.9939	38.937	39.2561	36.5038	41.3666	39.8261	35.0016	6744.03	47.5888	54.8559	36.2046
HIT 1385	193.394	88.9234	416.599	88.8904	86.0856	41.1972	39.4176	34.9934	34.5424	34.7703	40.2396	35.3142	35.9149	35.5891	33.6935	38.061	49.3044	47.0782	49.9548	41.3228	42.0977	50.4463	47.9399	41.99	37.3766	36.7749	37.9997	36.9227	4192.76	46.3408	46.1966	36.6906
HIT 1386	35.0308	39.3747	44.4955	34.4907	38.4135	36.6391	36.7451	33.4023	32.2566	33.5618	34.4628	32.9388	33.8507	33.8128	33.7111	39.4673	41.1606	40.4191	39.8998	53.0827	47.1424	41.3572	44.4037	42.203	38.1618	36.9705	38.8232	35.1609	10827	49.2243	49.7944	36.3497
HIT 1387	33.1701	42.2088	34.0599	35.37	39.1145	37.4751	34.9891	35.3158	256.17	41.6798	35.7556	37.1741	35.238	38.7471	34.3986	39.2759	630.413	334.104	191.855	167.242	64.2165	188.17	269.651	5111.92	195.235	114.373	76.6427	393.02	92.1257	108.359	131.924	654.379
HIT 1388	33.9148	41.3419	34.6231	35.1869	38.8822	39.4623	35.1821	32.339	36.3949	38.2664	36.5082	34.3527	33.5699	35.9676	34.2484	35.3631	61.0743	53.108	53.3382	72.2561	97.8642	52.7444	49.3314	46.4482	37.9384	73.7201	39.5969	37.5802	60.9161	101.913	58.3834	38.7051
HIT 1389	32.3506	38.1474	33.3128	35.6196	37.0672	38.8871	33.7491	33.2988	32.6374	35.9626	33.9623	34.2649	32.8561	36.3782	33.3821	34.6432	48.8939	52.8458	48.0406	57.8852	49.0195	42.6915	41.3831	48.6317	37.4532	35.9628	37.3681	36.6577	56.9704	41.3388	60.464	38.1905
HIT 139	43.2512	38.0802	41.7616	46.2247	248.379	37.2003	34.1118	81.0795	33.2303	48.1548	56.8276	34.1544	33.5649	41.4994	33.0435	35.1087	3281.36	1431.1	89.3706	225.951	11239.2	478.061	203.612	6310.84	248.126	995.149	13783.6	144.652	861.189	68.9467	397.403	3420.28
HIT 1390	41.1991	54.0466	32.9305	37.3906	39.1148	38.6573	33.5975	34.7676	33.599	33.7849	35.0105	33.3933	46.4005	33.2764	33.456	36.2291	9620	20021.9	1307.23	831.152	1084.03	3460.04	713.534	281.535	3702.11	641.852	4089.36	502.072	4368.29	806.606	4340.75	1264.09
HIT 1391	32.3949	37.1485	32.8292	35.0674	37.803	38.5595	33.605	33.2963	33.0555	34.2279	34.8336	32.9285	32.9487	33.5817	33.6409	34.4164	43.0869	37.7915	40.7926	43.4569	39.6764	41.2924	40.8308	39.1926	37.363	37.3477	39.0655	37.2613	52.7831	39.7045	50.172	37.1947
HIT 1392	32.0967	35.2562	33.536	33.2552	38.8307	43.5286	33.6095	32.6138	32.8274	33.94	33.1365	33.2504	228.235	33.5483	32.8866	34.9377	786.51	1221.32	170.882	270.901	108.653	667.645	421.132	428.509	631.984	184.501	244.474	379.969	293.732	106.19	489.868	1969.66
HIT 1393	32.078	36.5731	32.958	33.4027	38.7452	35.8048	32.7623	33.0596	33.0948	33.7717	33.7588	33.2408	33.5281	32.9422	33.3421	35.3621	42.2202	42.9955	40.3711	41.9743	40.8898	42.0299	38.6067	39.5012	36.4893	36.0751	40.8252	37.5035	61.9117	42.6288	49.4453	36.25
HIT 1394	32.0371	35.7838	34.0282	33.8407	37.3676	35.3974	33.5418	32.9514	32.8561	34.566	34.3875	33.3996	33.5634	33.5529	32.9465	35.2714	41.7552	38.4405	41.9917	40.6097	39.1494	41.7094	36.5016	40.472	37.77	40.1404	39.2581	34.039	61.5555	41.7621	50.3034	35.9495
HIT 1395	32.059	37.1434	33.3332	33.5063	36.0938	36.0115	33.2909	32.4628	33.8035	34.8372	34.4438	33.3152	33.8603	35.131	33.4304	34.5312	40.0213	40.638	41.4598	40.5561	35.2126	38.5758	38.8867	38.8041	36.6002	36.9763	36.7221	34.454	65.6818	42.1234	51.2324	35.3451
HIT 1396	32.7314	38.6426	33.755	34.2278	40.051	40.7236	34.0449	32.9811	34.4987	34.8471	34.871	33.57	34.3042	33.8344	33.2978	36.2971	287.749	440.923	246.4	122.833	125.632	130.376	609.786	121.558	76.5331	278.982	519.136	43.3914	880.961	58.8904	176.175	79.1082
HIT 1397	32.0005	36.376	33.1681	33.6481	37.2545	39.1083	34.073	32.8094	32.5703	33.0243	33.3924	33.1038	33.2335	32.8884	32.7106	34.6679	45.3789	41.6276	40.4406	41.5695	46.4219	47.2119	43.6787	40.1074	38.4845	36.2874	39.3778	37.3525	59.8051	41.0057	48.3049	38.0508
HIT 1398	32.3615	38.809	35.962	34.7411	41.4667	40.4351	34.7442	34.0682	33.5085	35.1977	34.3872	40.5169	67.8192	33.2479	35.6956	43.7812	346.413	431.226	121.191	112.661	92.7987	132.884	190.459	108.195	126.238	161.076	159.339	81.0792	143.114	58.862	193.367	139.692
HIT 1399	34.2269	43.8432	53.7405	2284.16	115.292	40.4352	37.1101	36.0414	67.5806	6040.74	6569.63	47.7744	37.0738	2341.05	40.4592	41.1781	3188.58	1985.59	4490.02	4078.84	493.162	141.604	284.839	1668.48	3306.01	241.706	152.462	12370.2	172.3	4606.75	1278.69	4470.85
HIT 14	32.0327	36.7175	32.8295	33.4093	37.6833	36.6986	33.8544	33.1298	33.1917	33.8842	33.4873	32.9696	33.5625	33.4352	33.3275	35.5695	183.969	223.859	55.5474	174.858	326.603	70.4427	47.4963	73.2384	62.5381	136.841	41.0423	37.3031	237.446	47.5609	293.155	236.05
HIT 140	32.2403	37.8611	33.0838	34.1963	38.632	39.3179	33.9397	32.8671	32.279	33.9268	33.8649	32.8935	34.0469	33.3501	33.741	36.2578	50.0987	49.943	48.1475	45.2275	45.98	55.0072	48.7551	44.3213	38.5625	36.2157	40.5838	36.0833	59.421	38.7129	52.7022	36.8143
HIT 1400	32.1952	36.8354	32.9498	33.978	38.0141	37.7411	33.9828	32.4757	33.1584	33.397	33.5194	33.4731	34.575	34.5714	33.6894	35.1828	40.8236	39.0302	39.4804	40.235	38.5706	39.3361	39.3854	38.931	35.3832	37.1606	40.1159	37.1819	68.3951	47.7201	60.2285	35.2495
HIT 1401	32.1541	36.4693	32.2627	35.5755	69.1884	37.3565	33.6268	32.9068	33.0766	33.6689	34.9078	33.0878	32.4551	34.4741	33.6194	39.8602	46.4402	42.7527	44.0557	43.9492	38.8129	40.3103	38.2054	40.1905	38.7463	37.7495	40.151	47.133	55.6539	46.7047	51.5402	37.3575
HIT 1402	32.7825	38.6589	33.6729	33.4639	44.463	35.5666	33.5941	32.1297	32.5221	33.5036	33.6236	32.9491	33.1911	34.1867	33.1687	35.2382	44.8673	41.8867	43.1557	40.9635	40.7594	41.8734	42.2119	40.5238	37.9243	36.9489	40.646	56.302	61.6534	43.6695	50.6925	36.9619
HIT 1403	33.443	36.865	33.2073	36.8687	54.9012	39.597	34.7939	32.9822	33.4757	37.7201	38.5681	33.2974	32.5589	33.4604	36.2889	35.2589	45.0921	39.1573	40.6057	40.0882	40.8065	37.9073	37.5763	43.9016	37.0855	36.4012	42.8661	79.3594	58.823	44.7808	50.2481	35.3383
HIT 1404	36.5409	36.3413	164.298	34.9815	62.493	38.6869	33.6053	33.1369	33.2851	33.7944	33.8705	33.1514	33.6159	34.9621	34.1367	35.3898	43.1367	43.9894	44.7924	41.9214	44.2685	42.2498	42.3758	41.0308	38.5291	36.2963	44.8485	111.405	61.9498	41.7131	52.5714	39.8704
HIT 1405	32.641	40.5101	62.8474	33.5252	39.0227	37.6475	34.2095	32.5265	33.3876	35.5014	33.744	33.2681	34.1387	33.0231	33.0998	36.0074	39.5438	36.9854	41.2856	40.0949	40.7346	41.0238	38.1533	36.3664	36.1037	36.0879	39.358	36.1297	60.9596	41.2398	50.2237	34.6717
HIT 1406	32.4922	38.3719	48.792	33.2753	39.102	38.2492	34.401	32.7368	35.0282	33.8473	33.5973	37.217	33.5443	33.6101	37.5675	36.2766	53.5925	48.7744	51.2807	47.7432	43.2828	46.7591	47.6651	47.4576	43.2125	37.3585	39.6655	36.799	60.9209	43.4023	51.1041	40.4005
HIT 1407	40.118	56.7308	196.937	58.7534	40.3007	38.1937	41.0708	48.9255	50.3341	49.3875	46.1921	49.2914	37.9286	52.2808	42.3183	42.0114	57.5706	64.6588	50.6093	45.3126	45.809	51.7763	48.485	45.6605	40.4871	38.8017	53.2512	42.1734	481.82	52.8919	60.8937	43.7368
HIT 1408	33.5584	48.3897	73.3755	49.4626	39.9805	38.3339	97.3328	42.8178	53.5211	44.7519	43.1085	82.6394	44.2464	50.5156	55.7295	123.445	45.3045	43.7393	38.4325	99.9849	40.8185	44.0996	47.7919	42.081	41.2607	37.9028	41.0632	72.3315	18586.1	67.2203	57.0083	34.5869
HIT 141	32.5645	39.4888	34.3272	33.9105	45.1445	37.3038	33.7495	33.1249	33.5546	33.712	34.2906	34.5666	34.2318	32.9583	32.64	36.3999	79.9959	58.0459	43.7604	48.2315	77.6171	45.7288	46.0947	55.135	40.6917	57.3119	85.1423	36.3761	111.143	41.994	59.9109	67.8563
HIT 1410	33.8946	52.1925	223.915	65.828	45.608	37.0368	35.5856	33.7916	32.8484	33.6703	34.0885	32.7626	32.7099	33.4154	35.2045	34.6305	46.8273	44.3957	41.0546	174.914	36.6351	38.4635	52.9077	39.3403	38.169	41.2108	40.7035	129.361	32349.9	69.0027	59.9684	36.1749
HIT 1411	32.3427	36.5951	33.0195	34.5004	38.2806	37.0138	33.2181	32.7169	33.4108	35.6424	34.2289	34.0953	32.2654	33.3399	33.7817	35.6636	46.6607	38.568	39.6683	43.5273	42.3173	40.0188	38.2448	37.3559	37.5894	36.2629	41.2129	37.3335	645.182	44.0046	57.7828	36.4113
HIT 1412	32.4583	39.3728	33.2505	33.4239	37.5071	37.0458	34.202	33.45	36.4525	33.483	33.8087	63.884	35.8943	33.497	34.7645	124.557	47.6022	42.7387	40.5706	43.0068	45.1904	43.1297	42.6564	38.7916	49.6906	35.8877	40.6655	36.627	81.5304	44.7763	56.7334	36.9923
HIT 1413	35.1159	58.6177	43.2779	50.0857	45.1676	40.4861	53.8514	46.5726	44.9758	58.927	47.8414	63.6953	46.8157	52.0309	41.2935	92.7959	61.6955	60.0725	55.5529	56.737	55.1299	56.4639	50.4456	49.989	44.6307	41.3179	41.4666	50.6055	1072.51	49.88	54.075	47.0502
HIT 1414	40.0258	114.702	88.2677	51.8511	39.2828	37.2156	281.145	54.943	264.233	94.9313	45.9303	1050.18	125.275	69.601	95.9046	1407.04	47.813	46.9719	40.5124	42.5479	39.4497	41.7551	45.2664	39.6452	40.1082	35.7154	47.4225	40.7107	334.492	49.3657	56.6912	36.8378
HIT 1416	83.3136	93.7003	417.314	50.5688	39.3285	36.7999	40.2151	33.8345	34.196	35.5906	35.9107	35.407	34.8572	34.0788	33.9427	37.234	42.4515	43.525	39.2571	55.1712	41.6733	42.0713	48.2565	38.4526	45.8519	36.5446	36.8256	50.6795	4679.43	75.1682	55.7897	35.2889
HIT 1417	32.5169	37.8305	34.1065	33.6616	37.5119	38.5131	33.0624	32.5997	34.0068	34.0461	34.3813	33.5313	33.2105	33.755	33.3759	35.1238	44.0146	41.837	40.6672	41.6085	44.6677	47.9648	43.1352	40.141	38.8167	40.9875	42.8196	37.5017	68.0124	569.309	53.3951	36.884
HIT 1418	32.1993	37.4865	32.7617	34.0313	36.5977	36.4407	33.2105	32.4954	32.9159	33.3497	34.3963	33.1717	32.7606	33.7866	32.7026	34.0316	44.293	40.247	42.0876	42.0938	39.9115	38.7226	39.5075	38.7715	39.1613	37.2335	41.2537	37.4783	59.7035	47.3237	46.4465	36.8253
HIT 1419	32.3464	38.5762	33.4804	33.6562	37.8605	36.3158	33.3565	32.5609	33.3899	34.1236	33.3454	33.3123	33.3323	33.4903	33.1844	36.444	45.6522	40.0714	38.1102	41.029	41.9421	42.7151	40.5948	39.2845	36.6907	39.3936	37.2233	36.8005	61.2291	148.554	64.4028	35.055
HIT 142	33.1275	40.2902	34.9118	34.4994	41.5416	39.5374	34.3866	32.8694	33.6972	35.3166	34.7834	33.4203	33.3865	34.4182	33.492	39.9125	46.2791	40.1125	44.7794	43.1075	40.8196	43.7072	43.5306	44.044	38.8153	36.8602	40.1072	36.7136	62.0498	45.5126	51.9828	39.5215
HIT 1420	34.2388	44.3706	35.8635	38.0789	41.9366	38.905	46.8818	61.7659	45.56	61.5403	45.1995	38.3783	43.9615	92.3644	46.038	38.4385	69.8031	62.7211	64.0167	60.5006	47.4442	56.2408	50.2507	54.3759	53.161	42.2697	48.1015	47.5405	74.8494	569.77	62.839	50.7229
HIT 1421	32.4831	38.473	33.829	36.1123	39.1993	37.662	44.1162	38.6998	52.1772	1603.41	38.108	758.211	38.3932	41.2109	38.0563	39.3794	52.8622	93.7888	47.2487	46.5211	43.7265	48.1883	44.143	59.1709	96.8361	46.394	43.6011	40.3041	67.5757	43.8443	55.122	45.145
HIT 1422	31.9816	39.5721	33.7947	35.8541	36.4993	37.9584	195.477	89.2767	44.1078	78.973	43.3366	51.392	47.3672	117.891	62.7641	34.7413	42.931	40.3122	40.9259	39.9747	40.4556	41.5942	38.2385	40.9176	42.2686	36.6643	42.3267	37.4407	61.6303	392.339	49.0232	38.9101
HIT 1423	32.486	37.0632	33.1806	33.9958	40.1184	37.6955	33.2239	32.8859	33.4958	33.9483	33.505	33.5056	33.2738	33.7368	33.5494	35.25	47.2102	43.3235	41.6425	47.6051	44.7832	51.2417	40.0215	41.9845	36.4027	36.5189	39.245	36.0397	71.4595	177.879	49.1042	37.0627
HIT 1424	31.5602	36.2782	33.0036	33.0238	35.3422	38.3343	33.6665	32.6787	32.8497	33.5911	33.9147	32.5936	33.6494	34.0138	32.3409	35.1213	47.6346	42.3764	40.5735	44.3447	42.2985	43.1641	43.9719	40.5574	38.7799	41.515	39.0621	34.7427	61.6899	43.933	48.0857	37.5469
HIT 1425	32.2043	36.3664	32.5546	32.9612	37.4321	36.6663	34.1018	32.5498	33.1947	32.1571	34.327	33.2763	33.1237	34.0487	33.3912	35.3053	57.1291	43.5337	39.6833	43.2467	57.7489	44.2291	40.0065	40.2297	36.3129	36.7809	40.9237	36.4329	62.4209	215.223	52.7534	36.0248
HIT 1426	32.4458	39.1109	33.3262	35.4439	41.4317	39.7396	38.8664	35.2232	36.2558	38.0553	36.0719	35.6315	34.8394	37.5405	35.8342	38.6701	48.3622	46.7549	44.3954	46.3444	44.5515	44.2524	46.7214	41.6636	39.6147	37.3965	40.9995	38.9413	69.6914	49.2815	54.4742	41.223
HIT 1427	32.4956	48.7399	34.2197	33.9196	39.1731	37.6512	37.8812	35.2588	34.6121	40.6941	35.2695	36.5964	34.6503	36.8774	34.8584	37.3328	51.1046	45.1099	43.8228	45.4117	45.3023	44.3147	46.3769	46.1102	37.4732	38.3037	39.1069	37.4899	64.0461	43.8613	52.0865	38.9843
HIT 1428	32.762	39.8985	33.6859	34.604	38.5718	38.0534	35.9236	34.3075	34.6934	35.8802	35.1573	34.5433	34.4668	35.2042	33.5975	36.1647	47.9765	44.7414	44.8622	42.0917	40.9131	43.3752	41.7161	39.756	36.9937	38.6476	41.1617	38.2249	64.0436	44.6056	48.8728	37.4656
HIT 1429	33.2511	37.924	35.4268	34.7289	38.4634	39.8114	34.3758	33.6263	35.0196	36.3995	36.2393	36.0151	34.4951	35.4538	34.2758	38.314	48.3388	48.4642	44.2347	44.5678	41.7368	46.2059	43.7028	47.0953	39.5365	37.7259	38.2827	41.2517	66.7856	44.3978	51.2223	40.7191
HIT 143	32.0269	38.1842	32.8346	33.9169	36.2698	36.6011	34.3877	32.5788	32.5583	37.5916	34.1607	36.2	33.107	33.7487	33.0802	34.8884	38.9429	35.6163	38.0821	40.4001	38.9627	38.2211	40.1843	39.701	36.247	37.57	39.6706	38.4134	61.9814	41.5009	52.0947	34.8999
HIT 1430	32.3823	38.3099	32.6214	33.1099	37.651	35.8701	34.073	32.9498	32.9026	34.3392	33.9028	32.9582	33.8715	33.0358	33.0502	35.1054	41.9241	39.9703	39.3861	39.8803	45.0565	44.6725	42.2665	49.2541	46.3416	36.8282	38.7007	35.1406	60.7969	40.5754	52.8208	36.7969
HIT 1431	32.4223	34.9218	33.0908	34.2299	36.6978	38.6821	33.7056	32.8363	33.6607	34.7206	33.6959	33.4413	33.4082	32.0682	32.6679	34.2375	42.0087	40.9529	40.0402	40.1364	39.2053	42.138	40.7832	41.3799	36.5981	35.7584	39.8021	36.5421	58.1561	53.2704	49.5861	36.6472
HIT 1435	33.7848	44.229	37.9926	36.2566	49.038	43.4303	35.4759	35.775	37.0885	44.509	39.4594	36.8775	35.2487	38.5648	35.5251	38.256	62.1975	54.9634	53.5969	50.1898	49.0369	50.5296	51.6142	53.614	43.3236	39.2234	38.1108	45.3891	61.1934	63.1554	61.0947	41.847
HIT 1436	32.0679	38.1353	33.2814	36.1753	37.3807	36.1275	33.9092	33.0507	33.6071	35.9154	35.3613	33.4054	33.9391	36.2113	34.0888	35.2622	46.2185	46.9612	44.3303	48.4443	45.0976	44.234	46.9801	46.9522	38.7725	36.8025	39.0199	38.2727	58.8581	43.0588	48.703	38.1891
HIT 1437	32.117	35.9348	33.6371	34.0899	36.2126	37.1264	33.508	33.3366	33.3574	34.1515	33.4613	33.5402	33.2727	34.0256	33.82	34.1089	42.8745	40.7329	40.9857	40.2722	39.9177	45.0483	38.2219	39.6875	36.4116	37.3315	42.0649	36.5355	56.5112	46.7351	56.553	37.2943
HIT 1438	33.095	38.6438	33.7203	34.7694	37.844	38.8587	35.0931	33.3541	34.3986	35.6257	33.8314	34.537	34.0397	35.804	34.6904	36.3381	50.0543	38.2285	40.8552	41.0736	55.9024	48.9113	39.4739	38.1023	38.1222	37.2766	39.1045	35.14	66.7251	43.8847	53.5452	43.5977
HIT 1439	33.7714	44.1408	33.8681	35.5876	39.3398	40.0786	37.8097	35.5706	34.9076	39.2663	35.7452	36.0866	35.7782	35.2053	35.1517	36.289	54.4344	55.9515	46.7211	46.5836	46.3648	49.6849	47.6295	49.9619	38.9943	38.7844	39.3822	39.3344	62.2489	44.1396	54.7333	41.4984
HIT 144	32.3755	36.4793	33.0037	34.1186	72.6223	36.7491	33.6068	32.4623	32.2526	33.6874	33.6153	32.7088	32.236	33.2826	33.0629	35.2634	44.3331	39.4412	39.3199	41.893	45.2456	52.6775	41.7664	40.9665	37.0425	35.6897	42.2868	36.7132	58.0302	42.112	52.3447	35.6917
HIT 1440	33.7193	40.7846	35.189	35.9124	39.0184	41.1586	34.9654	33.576	33.9987	36.7547	35.4643	37.0801	34.1707	34.6823	33.8193	35.1589	76.3959	50.6665	48.9792	46.9789	95.2019	52.6892	48.6496	48.1709	38.6695	38.4	38.2226	37.9821	64.79	42.7482	50.0856	74.1617
HIT 1447	36.4933	832.131	34.7196	37.2064	275.07	150.43	39.116	1413.46	33.3023	34.1568	33.6316	41.3189	72.8623	33.5353	35.3368	36.2425	58.7116	47.0636	41.0775	41.2482	40.7923	44.1725	45.6962	40.1593	39.3654	37.0476	41.7047	36.5582	60.996	43.8584	57.041	52.061
HIT 1448	32.6723	42.3621	32.9336	32.99	38.6221	38.3499	32.8992	34.7924	32.7711	33.9789	34.2713	32.303	33.3241	33.4903	33.4305	34.3332	43.4714	42.4449	41.7885	41.4293	41.2483	43.8688	42.399	41.2672	37.6509	37.7727	40.0356	36.0307	59.6867	41.4541	50.0739	36.4494
HIT 1449	48.1438	2610.95	40.4862	37.6357	609.94	729.668	41.058	3684.94	40.9191	48.5485	38.358	53.0173	171.095	38.7804	36.5439	40.4873	198.184	52.9093	53.3802	42.1372	42.4671	78.9885	74.7402	43.9102	40.1737	37.9835	41.4574	42.2339	73.3848	46.3141	55.8067	96.6907
HIT 145	31.9589	36.1479	32.8779	33.154	37.9636	36.0395	32.8967	32.1826	32.8641	33.5668	33.8417	32.7738	32.5769	34.047	32.2688	34.6533	43.0588	38.1521	38.3956	39.5203	41.2105	40.5791	50.5205	39.4125	35.8091	36.5745	38.8481	36.5076	59.461	43.9403	51.1749	38.9847
HIT 1450	344.829	5119.26	5378.29	586.028	57856.3	92854.6	423.861	2485.04	772.018	2955.32	625.796	10928.3	5240.14	148.101	1841.05	20770.4	72.2457	52.7403	56.4087	52.4859	57.5087	82.0691	67.972	44.5716	63.5431	45.2866	54.8751	55.0018	177.963	138.29	54.6912	75.6384
HIT 1451	36.5104	381.366	37.4121	37.9345	57.227	64.9899	40.8756	512.843	48.8888	121.616	57.1823	315.765	87.1943	41.3501	84.0826	845.586	61.2272	43.561	48.2543	48.2628	43.4964	47.4552	52.9755	48.5319	42.9961	40.7863	43.8263	39.8665	81.5595	48.8398	53.7082	42.9135
HIT 1452	34.6453	231.936	36.0852	34.751	96.907	202.061	34.1002	471.802	33.4559	36.6385	34.145	54.833	45.7344	33.6234	35.8297	53.914	47.9052	42.995	41.0831	40.5801	41.0956	43.3824	43.4703	40.3913	36.3792	35.9693	39.9223	36.9397	67.3249	45.1202	51.0365	40.6132
HIT 1453	4552.6	63.6122	33.4764	33.6921	43.05	41.1558	38.3907	33.1329	34.0232	34.402	33.9272	33.9443	34.2097	33.8891	33.7469	35.5268	44.8831	44.4727	43.8784	42.2468	42.3841	44.6659	45.2974	40.3515	37.2989	59.3168	40.2013	37.6797	57.5795	41.0908	51.1524	35.9518
HIT 1454	183.8	37.7302	33.4185	33.6642	37.8067	38.1818	33.3994	33.1905	33.0542	33.7876	34.5191	32.7056	33.4209	33.7042	33.2408	37.1658	45.7804	41.5768	41.0296	40.2157	44.3635	42.3976	40.933	42.9007	38.8273	36.3649	41.6929	37.6739	56.7612	41.6928	51.8909	37.3531
HIT 1455	3223.61	66.4188	33.0508	34.5134	39.669	37.6564	37.8655	32.7705	33.4033	33.883	34.8858	33.434	33.7386	34.012	34.0912	35.7814	40.8954	39.2477	38.934	42.5019	39.1798	40.3494	38.7805	36.7028	36.1172	56.1034	39.7496	36.4353	63.5409	42.2018	50.7338	35.7982
HIT 1456	3487.54	92.8491	38.0597	41.3621	318.354	572.047	42.3523	34.3734	38.7976	39.5798	36.5661	41.6637	49.358	35.9345	34.646	125.128	57.5133	49.9096	53.2516	46.333	45.573	46.9539	46.9407	48.9286	41.7384	61.0426	40.9938	39.3794	64.4458	50.0509	55.1571	42.4368
HIT 1457	732.968	180.449	780.034	238.745	146.693	39.8615	121.138	33.4671	33.2537	36.3174	35.0818	34.5841	33.9254	34.0727	33.1924	38.2022	43.1742	41.7342	40.2854	39.6851	39.3626	40.2304	44.6052	38.8127	38.0206	44.8217	39.2783	42.6346	56.287	41.2964	48.9124	38.4323
HIT 1458	2623.85	129.612	185.638	48.363	235.659	326.014	54.8492	116.853	49.6952	137.266	56.9905	506.916	213.61	42.5014	142.888	832.186	169.473	114.514	655.156	147.529	155.062	183.49	139.678	89.9575	123.773	92.8453	52.803	66.2309	188.933	133.99	195.129	221.157
HIT 1459	32.064	40.8046	32.9148	33.6496	96.0437	164.073	33.4285	37.3948	33.0926	34.2933	33.4079	33.9373	34.5215	33.2424	33.4328	35.2754	41.5831	44.9896	39.063	42.6183	41.8982	41.5797	42.4084	38.4532	38.3809	37.5707	39.1886	37.5031	58.1177	52.1527	57.8995	36.2281
HIT 146	31.9894	36.0755	33.1254	32.8658	37.1821	37.6403	34.2756	32.4385	32.6501	32.5319	33.5306	33.8304	33.4887	33.0241	33.336	36.1586	40.6726	40.0078	39.4501	38.689	38.2673	40.6909	39.3797	38.7124	36.8528	36.4162	41.9491	37.7885	57.7058	52.7423	57.2711	35.8559
HIT 1460	31.9182	36.6402	33.8127	33.3648	36.8197	36.937	34.0757	32.5852	33.2731	33.6181	33.8063	34.8165	33.7798	33.2736	33.9018	36.5314	46.9243	42.1914	41.8494	42.9913	45.8603	48.0144	47.9392	42.8331	37.2345	37.4989	40.8871	36.5036	59.3463	41.4064	54.2978	35.853
HIT 1461	35.5019	55.1405	35.8391	36.3175	43.9532	48.4863	39.2296	40.7217	42.3125	43.0021	39.1116	42.9252	37.8967	40.1851	37.829	40.1612	50.1965	46.4676	44.9131	47.2424	45.0531	47.5124	43.6251	43.4373	40.1275	39.4133	40.4393	37.6675	77.9798	99.3871	51.47	41.1814
HIT 1462	101.681	406.256	52.303	72.9535	8368.61	12614.6	107.65	81.2408	82.3816	225.12	61.823	302.957	558.5	41.6244	41.7957	2795.12	79.6701	81.0098	89.3847	56.6914	91.8148	67.6027	96.0824	61.1379	59.1979	65.3235	48.5974	44.0452	158.667	81.102	65.6976	56.5075
HIT 1463	32.0171	36.6802	37.5462	34.8253	36.4942	35.3908	33.8203	32.5468	33.336	33.9848	33.5621	32.8016	34.3735	33.5338	33.0611	34.8121	46.0474	46.2825	39.4179	45.1646	45.4335	42.3225	49.1214	39.057	39.4429	37.9727	38.1263	37.2762	60.1797	41.8995	53.8891	37.0728
HIT 1464	1189.72	94.0658	155.712	40.546	167.443	197.877	52.2999	125.793	45.3567	119.043	55.288	542.942	195.051	43.0099	93.6104	692.39	149.654	94.1817	1178.18	133.587	129.219	131.983	130.699	80.0601	112.644	84.1549	61.2632	71.539	153.962	112.311	174.997	208.512
HIT 1465	32.4366	44.6411	33.9134	33.2821	38.1923	38.4455	34.2716	32.8963	34.3172	37.921	33.5194	35.8985	33.1888	33.3372	33.2843	35.4575	47.1526	49.9796	45.657	42.6611	41.6233	43.3466	40.3276	41.7415	38.4721	36.5581	38.2486	34.8649	60.8277	43.2865	51.4443	37.9917
HIT 1466	32.0192	39.4237	33.0391	35.3897	38.3097	38.7165	34.051	33.3755	33.4421	34.6326	35.2342	33.5066	33.6558	34.7932	35.8529	35.7086	44.0394	41.7359	41.4874	40.7838	42.4061	44.7554	43.6139	39.5496	37.5208	36.9272	41.5208	35.9916	58.0115	50.0448	55.1535	35.8341
HIT 1467	31.7806	38.4461	33.3148	34.3828	39.5238	36.6946	34.8097	35.0649	40.9618	36.9771	34.9902	35.4336	34.1886	35.1187	34.6135	36.1617	52.555	50.6176	47.5478	41.4023	47.8466	47.4943	47.322	44.2192	38.9681	39.1524	42.6099	39.6198	75.4808	47.6679	54.6698	43.7686
HIT 1468	352.308	5376.92	5900.1	480.1	61489	91694.6	459.524	3189.14	918.923	3531.78	767.994	12784.8	6181.15	169.638	1976.65	24892.5	71.2461	49.0124	53.0653	50.5197	62.6619	89.5345	62.3422	44.1436	65.9804	45.9622	57.2145	54.1232	184.563	140.163	55.3386	77.3947
HIT 1469	32.8723	77.0275	35.4271	37.186	40.076	38.3922	35.0008	207.419	46.434	156.193	68.8392	1065.08	192.835	46.4933	178.112	222.528	42.4399	37.155	46.8706	40.8462	42.6597	46.8002	40.7968	39.7002	35.6964	37.254	40.2184	37.5171	59.7981	44.0253	49.9325	36.8926
HIT 147	36.1476	39.376	34.307	37.6319	40.0215	38.9773	38.2758	36.9907	36.7322	41.5783	38.1734	38.6924	37.2575	36.9381	36.2331	40.3955	50.7279	51.6443	48.8751	47.0669	42.9887	45.9242	48.9292	42.1893	39.0235	37.6088	40.3944	39.4695	63.9	44.5096	48.6659	43.347
HIT 1471	33.1024	41.346	33.2756	36.8646	37.9233	38.1267	35.4878	33.786	33.6281	37.2323	35.9095	35.0738	35.4756	35.1541	35.2661	35.4586	46.1282	46.1972	41.4592	50.1825	45.3771	44.1378	41.198	41.345	39.4055	37.6884	39.5676	37.6146	69.8547	42.5897	53.2174	36.9748
HIT 1472	32.4226	40.5758	34.1393	33.6528	38.1263	41.9565	34.1536	32.9507	33.8193	35.1503	34.4727	33.1085	33.3196	33.7578	32.5113	35.7509	51.2337	42.189	41.8819	40.5408	40.0523	42.9671	42.7771	41.2001	36.7597	37.3748	40.1505	36.6264	62.133	42.0023	50.7449	35.1817
HIT 1473	32.0763	38.4635	33.3662	34.273	37.0514	37.1352	34.2573	33.5437	33.3877	33.8907	34.1422	33.948	33.6801	34.3119	33.8732	37.326	48.6716	42.7478	40.227	41.2154	42.4507	42.5387	40.3491	39.3373	36.7914	36.2258	40.5894	37.1697	59.3275	43.2203	48.0077	36.1496
HIT 1474	37.9273	43.8757	35.6004	36.0879	40.0786	39.9691	42.6165	35.2041	36.8567	38.9446	36.0827	38.2153	38.1344	36.9494	37.2894	38.1219	947	218.888	392.552	111.189	190.992	153.255	280.71	150.895	120.847	449.398	106.693	148.177	109.746	169.205	1127	485.924
HIT 1475	32.7127	36.3595	33.4584	34.5471	37.5585	38.4897	34.0001	33.0282	33.9624	34.3639	34.8267	34.0637	33.3624	33.6846	33.7202	35.9824	47.8993	45.2642	48.834	41.9017	48.5448	44.3609	44.507	45.0691	38.5557	36.5496	40.6875	36.9187	68.5492	40.3433	51.2475	38.1295
HIT 1476	31.7571	44.2804	33.4259	33.9725	39.6903	36.2444	33.1832	32.5634	33.7591	33.9315	35.0061	33.1639	36.8638	33.4794	33.9903	34.1144	208.222	45.2667	74.559	81.8913	186.096	190.319	71.9642	59.7286	50.8206	69.9016	64.2193	39.3506	204.138	63.6217	81.3755	65.6359
HIT 1477	32.1986	36.9333	33.3256	35.1161	38.4814	38.8904	33.8032	33.6652	33.8425	34.7889	34.4218	33.7317	35.8548	34.3943	34.3466	38.0724	75.5532	44.0277	43.2458	42.4613	125.482	137.206	45.5515	41.5599	40.4261	37.0675	40.1935	37.3873	63.9941	51.0084	53.8209	37.0919
HIT 1478	32.2749	36.6861	33.4263	33.4429	36.1869	37.6365	33.3298	32.5382	32.7606	33.7701	33.9534	32.9831	33.1547	33.9434	33.3854	36.3319	315.631	43.0509	39.773	41.9722	223.299	147.031	40.9841	41.2249	44.0607	36.6628	39.0063	36.1822	73.851	41.5478	54.1196	35.6685
HIT 1479	32.2689	38.0929	33.0489	33.8559	36.173	35.8145	33.4571	33.3264	32.6071	33.8358	34.2701	33.3831	33.4865	35.2095	33.3483	33.9993	15485.5	116.061	53.902	57.9954	5598.58	1479.48	46.5422	58.8568	120.483	40.0902	41.7609	36.6111	204.251	59.7668	96.6301	43.4239
HIT 148	33.3659	40.8395	38.8821	34.354	59.5661	38.3657	34.6089	33.4268	34.7805	34.9579	34.4094	34.3237	34.6874	34.6199	34.6575	37.1516	54.0555	49.3211	47.1857	48.9025	50.8162	44.2725	56.5228	45.295	39.2254	37.424	41.6375	37.3762	63.454	45.3024	48.4577	36.9703
HIT 1480	33.1017	40.0026	33.9851	34.7276	40.691	39.8403	34.7509	32.8714	33.5582	34.5438	33.9437	33.6109	34.2051	34.447	33.7227	39.0402	67.6682	113.618	50.7238	46.7374	42.2562	176.074	45.0763	40.5369	51.8852	83.9916	43.9597	41.8852	64.0946	42.1031	87.2998	38.9118
HIT 1481	31.8759	37.8588	32.7739	33.4772	37.8661	38.0079	33.5202	32.4046	32.3337	33.4122	33.2873	33.4608	32.6545	32.9944	32.6127	35.4844	41.329	39.1709	42.623	41.0487	41.4246	40.4056	37.1963	40.2387	37.4822	35.7312	37.7399	36.0131	55.834	43.3971	49.3571	35.7331
HIT 1482	46.5591	41.8206	137.025	34.288	43.9622	39.2263	35.3985	35.4008	33.7207	34.3972	33.7445	37.0857	229.208	34.3793	36.4035	47.6265	680.755	113.769	109.022	178.065	502.613	109.673	221.789	61.2959	287.21	69.5772	60.0861	64.4629	83.6335	52.7261	315.524	56.5517
HIT 1483	32.0445	36.8276	33.0871	33.4403	37.5061	36.9716	34.0832	32.8411	33.2334	33.685	34.0271	33.3605	33.6943	34.0169	33.6001	35.2439	59.3229	44.6318	42.9919	43.3928	45.1308	100.986	41.1829	41.2529	40.6183	37.9916	39.7403	37.5031	246.622	42.7304	57.2552	36.9047
HIT 1484	31.9488	37.4166	32.5444	32.5289	36.9619	37.9168	33.669	32.4533	33.0031	33.9623	33.1885	33.2595	33.2867	34.0352	33.1742	35.7533	44.2176	37.6012	37.4875	37.3155	38.8657	39.2477	38.7928	35.7883	35.8682	35.8988	38.7075	36.187	61.349	44.3296	48.3286	36.2156
HIT 1485	31.7497	37.0151	33.0768	35.8664	35.7667	38.9403	33.2587	33.5349	78.1037	35.2207	34.6813	34.2343	32.9968	33.6855	33.5283	35.0213	98.797	42.7306	45.6938	41.8426	131.282	57.8031	51.3249	42.1897	41.0915	37.6111	37.0765	36.8298	143.786	41.5504	55.0057	37.2821
HIT 1486	31.9823	37.4281	32.9298	33.3663	38.0508	38.6935	32.9546	31.7354	33.0965	33.6889	34.1363	33.7764	33.0555	33.1526	32.4922	36.2342	110.623	149.118	87.8492	45.4125	53.2334	1014.3	91.7129	109.504	176.055	103.125	64.7457	44.0437	2241.6	53.1807	163.16	43.7273
HIT 1487	32.0274	37.2533	33.2646	33.5584	37.5401	36.8864	33.3177	32.3934	33.4554	33.7558	33.9294	33.0283	32.7484	32.6494	33.89	35.1124	40.8325	41.8656	39.7523	40.3648	40.1769	44.2762	40.5444	39.8377	36.7036	36.4896	40.041	35.7311	59.4981	40.9275	48.502	34.4228
HIT 1488	32.5265	35.7186	33.1375	33.5818	37.4063	36.201	34.2762	33.3551	33.4228	34.4216	33.7062	34.8407	37.0403	33.2538	33.6088	36.8913	444.563	187.852	56.6538	60.4616	66.6272	1709.93	73.0294	52.3293	181.716	51.3225	72.1113	40.4568	6095.09	60.9254	100.058	49.4291
HIT 1489	32.1528	37.58	32.9816	34.1363	36.9027	36.6793	33.0039	33.1602	33.6065	33.8611	34.5255	33.6523	33.9702	33.9953	33.4384	34.4534	44.7184	52.8643	41.0482	43.6998	47.1813	51.2401	40.1886	40.0525	40.2647	37.6075	39.5542	36.0991	54.7713	40.2721	44.7537	37.5091
HIT 149	32.6082	42.9398	35.8917	34.8673	87.5655	39.8993	33.6336	33.2132	33.6112	34.6053	34.0147	33.8326	33.4211	33.9726	34.4327	36.4609	41.7357	41.0875	39.3035	43.2392	39.7292	107.873	40.4491	171.846	36.586	37.2928	39.1772	35.9577	61.5675	42.4546	51.2208	36.4212
HIT 1490	31.9595	35.8352	32.3329	32.9971	36.8824	36.5233	33.9939	33.3724	33.4044	33.7543	33.2228	33.3964	32.7209	32.9677	33.7712	35.582	41.411	39.0919	39.2269	38.924	39.1932	39.4047	38.4671	37.944	36.2316	37.0855	38.9952	36.2524	56.7541	41.7132	52.6345	35.5178
HIT 1491	32.4434	36.6903	33.4002	33.6502	38.3623	36.8696	34.0689	32.8395	32.581	34.5932	34.4071	33.365	33.6826	33.3975	33.1734	34.8246	46.6865	41.8138	41.943	42.9575	40.3351	42.916	40.6546	40.3407	37.5994	37.0386	40.4955	38.0364	61.5502	42.4824	53.5083	37.0033
HIT 1492	32.1522	39.4696	33.304	33.4973	37.7712	36.5804	33.2756	32.3874	32.6629	38.467	34.0579	34.9825	33.0159	32.6249	33.5979	34.293	45.421	39.1503	37.9192	39.8984	40.2759	39.9494	38.8135	40.0667	35.697	36.7907	40.8011	38.3883	55.9505	39.796	46.6724	35.3545
HIT 1493	33.4656	44.9322	37.1379	36.8364	40.8254	42.5612	42.9203	37.6989	38.8223	43.5192	40.0665	38.2695	36.9779	37.3746	36.423	39.0029	48.5329	42.6448	43.2354	46.5329	47.9175	45.7735	43.8621	40.857	39.0409	39.2799	44.325	39.0961	73.6623	58.7078	51.833	38.9679
HIT 1494	32.3428	37.6804	33.0276	33.4786	39.7688	38.2865	33.4704	33.2375	33.1184	34.5433	33.8359	33.6487	33.7131	33.7854	32.9376	35.8977	60.4804	50.9472	592.958	43.9271	39.3932	116.001	111.282	819.291	38.5321	36.9075	42.016	36.5834	52.122	43.28	47.2066	37.9856
HIT 1495	485.642	1155.98	4042.81	673.001	578.672	54.7429	116.114	47.4307	64.6162	107.825	117.972	50.0072	42.6601	91.2502	44.2423	44.8983	595.936	214.301	408.144	662.441	341.432	184.361	492.808	79.011	166.774	164.316	76.9811	331.55	49315.2	619.919	73.4265	213.856
HIT 1496	33.1611	40.527	33.0755	33.9623	36.6166	35.5145	34.2171	32.0484	33.5944	34.0431	35.5618	32.6968	33.0258	33.9788	33.7375	35.1224	42.7513	44.3687	41.3519	39.4074	40.9024	42.3663	39.8154	40.4734	36.7831	36.7943	40.0839	37.5338	55.8248	42.7747	47.4227	38.7931
HIT 1497	40.4588	64.298	47.9584	45.651	53.7758	38.5918	37.3177	33.184	34.1261	34.835	34.6168	34.1939	35.4243	34.5466	34.7361	37.2714	45.507	41.721	40.7678	52.3894	41.2677	43.9836	40.4865	41.0027	36.2414	35.8115	38.4922	37.1994	283.113	47.6806	57.7418	36.4573
HIT 1498	38.358	62.3715	33.9517	62.7984	66.6614	38.3091	33.7425	32.9714	33.1006	33.7145	34.7828	32.3091	33.9352	34.0975	32.5634	35.1746	42.1928	41.8998	37.3936	39.9816	39.7124	40.3535	38.4273	38.3477	37.1446	35.8668	38.8054	37.1369	66.4149	42.9969	54.7908	35.7178
HIT 1499	32.7287	38.0578	34.1028	33.6998	38.0389	40.2075	32.9404	32.9743	33.5599	33.8234	33.119	34.0938	33.9884	32.9986	32.784	36.2661	50.2659	49.3707	47.1114	44.5046	47.1134	48.7077	42.2335	40.6772	37.4438	37.9181	39.8251	36.0607	102.661	43.0419	52.6215	36.9366
HIT 15	33.7773	38.5016	33.3914	34.5696	40.7305	38.1935	34.6969	33.3681	33.8364	35.9074	35.0549	34.0396	34.3583	34.1619	33.4301	36.2452	69624.9	22173.1	1038.45	12504	42893.1	3737.93	936.176	5451.18	2953.42	47505.5	581.495	67.1832	15102.4	156.971	24376.4	32583.5
HIT 150	32.0565	36.1579	34.3574	33.4353	86.9155	36.7395	33.473	32.5585	33.0932	33.7058	34.3377	32.7507	32.4037	32.9975	32.7789	35.507	48.6892	50.3511	41.7646	42.6608	41.3211	47.2726	39.4966	39.1211	36.934	36.8678	42.2441	36.7298	66.0206	43.9034	52.7533	35.6856
HIT 1500	82.1347	103.659	37.0072	97.8751	90.7855	38.3797	37.1559	33.3717	32.9193	35.0072	34.8125	34.5686	33.1701	33.2226	35.0017	37.4051	45.4534	40.3777	41.0097	40.7976	42.9713	41.9591	41.0918	39.7432	36.4278	36.65	47.9241	35.1385	3120.04	43.9021	49.5525	35.5419
HIT 1501	33.609	41.5164	36.1958	39.2033	38.4653	39.9378	89.8475	55.4131	42.0754	56.5953	44.5694	49.1985	45.3402	53.9399	41.808	42.4125	50.8533	48.4091	45.658	45.139	48.1558	46.6209	47.0426	43.1761	38.7465	37.2068	38.9967	36.9886	63.2502	44.2502	51.3002	38.7861
HIT 1504	32.062	38.8995	33.3532	33.0495	37.6662	36.9239	33.2706	33.2485	33.3901	33.2081	33.8436	32.2119	33.1468	32.8862	32.638	34.4891	49.562	48.0125	42.6324	46.8365	47.197	49.5531	39.2739	41.6542	37.6178	37.0095	38.267	35.4116	59.5482	40.7961	50.8141	36.7065
HIT 1507	31.9211	36.0706	32.7506	33.4713	37.1512	37.6689	33.6803	32.8349	33.2959	33.8039	33.9244	33.0284	33.1505	33.4419	33.6627	35.6984	100.133	50.0466	138.373	223.547	45.2444	90.5774	42.2003	168.286	56.2599	62.4456	654.788	116.549	9661.92	52.4703	53.4302	36.9367
HIT 1508	32.1764	37.3052	33.1031	34.5636	37.5138	35.4979	34.2299	32.794	32.8226	33.8023	33.7196	32.9627	33.2894	33.6794	33.1008	35.1793	51.4686	43.9657	52.8739	63.9635	41.7071	47.7673	39.9954	54.2856	39.6971	39.2189	122.546	67.3152	1172.88	43.6127	53.7752	36.1939
HIT 1509	32.1687	35.9067	32.4475	34.9803	36.2183	36.8214	33.0331	32.4814	33.069	35.6301	34.854	32.9036	33.1848	33.8328	33.0901	35.0896	219.699	78.8137	377.022	658.266	46.0425	184.174	41.8992	437.353	91.5897	91.7728	1878.9	95.0298	28360.2	53.0687	51.7069	34.6543
HIT 151	32.1214	35.6821	33.1652	33.2133	37.0297	36.8761	33.4909	32.0373	32.617	33.722	34.3284	33.3296	33.0826	32.8804	32.6136	36.0971	41.2135	38.4236	39.6003	40.1589	46.1319	40.3081	42.5422	39.1456	36.4812	36.8474	40.3704	36.9205	61.8836	42.2317	46.0726	35.6381
HIT 1510	32.1208	36.3706	33.3975	34.9052	36.7923	35.9121	34.9457	32.6221	33.1663	33.8728	33.4025	33.1818	33.1227	34.1852	34.1735	36.3359	73.0521	45.6962	98.7221	164.054	43.8552	67.6214	44.8539	101.675	47.2452	53.8953	380.559	399.507	8248.73	70.3518	52.0675	35.9154
HIT 1511	32.5694	36.143	32.5577	33.3219	37.0371	37.9477	32.9304	32.0607	33.4948	34.4364	34.3032	33.1972	33.8799	33.3635	33.2003	35.1989	229.399	88.7219	426.039	770.206	59.7322	235.501	48.0018	431.583	97.2664	117.859	2169.42	444.355	32289.4	63.7592	51.7218	36.3241
HIT 1512	31.7745	35.5604	33.1235	89.9966	38.7452	36.1434	32.8793	33.0432	33.8601	152.524	163.644	34.2584	33.2012	79.2406	32.2443	35.6445	161.847	79.4989	271.81	400.723	51.5245	120.089	46.8396	232.393	107.512	80.3873	1014.39	227.783	14701	128.147	65.2324	92.0028
HIT 1513	32.1871	36.3091	32.809	33.2052	36.7905	38.459	33.0795	32.6565	33.0335	33.8329	33.7421	32.9926	32.9527	33.2395	32.767	35.1671	43.8559	42.1454	39.5495	39.5914	48.5012	40.0739	49.6022	43.3725	37.1054	36.9598	37.1396	35.5726	57.5964	45.9895	50.9325	37.4339
HIT 1514	31.6739	37.3857	32.8808	32.85	37.7252	36.1199	33.5254	32.9597	32.9674	33.2696	33.7501	33.4204	32.9797	33.8451	32.2593	36.3156	43.9771	38.1632	39.9077	38.6225	40.1964	40.7946	38.1739	38.4434	38.0289	37.4701	38.3482	35.5664	58.2012	41.3247	51.6809	36.305
HIT 1515	32.3335	36.4266	33.3815	33.621	36.2012	36.4676	35.1367	32.8317	33.1399	33.8971	33.7336	33.9884	34.4506	33.4671	34.0262	36.2882	41.7883	35.1407	39.5538	39.1587	37.4959	39.8541	38.8526	37.414	37.3932	37.0999	37.0759	35.2748	56.9396	41.1836	48.175	36.731
HIT 1516	31.8901	36.5724	33.0004	34.4141	37.6688	37.4119	33.9537	32.6786	32.9101	33.5637	34.5518	33.6079	33.4499	33.8978	33.0935	35.395	43.062	39.8746	39.2588	39.8798	42.8055	41.2676	40.6674	39.7074	37	36.0459	38.662	36.3738	60.3535	41.7017	52.436	36.008
HIT 1517	32.4832	38.769	34.1994	34.3869	37.3156	38.0892	36.9867	34.6895	34.667	37.4344	34.8178	39.685	35.0328	34.532	34.296	39.0996	43.911	40.4524	41.4665	41.5935	40.799	41.1778	41.8486	39.8292	38.0637	36.6933	38.7076	36.5072	61.9231	42.3674	50.628	37.7772
HIT 1518	32.1158	37.3122	33.2123	33.7958	37.7514	36.7809	33.3217	32.3386	33.101	33.3911	34.0655	32.9008	33.4969	33.6786	33.221	35.2374	43.1267	40.6282	40.2053	41.7412	40.2238	40.5925	41.6754	39.742	37.3153	36.4338	39.0468	35.9228	62.869	41.7592	49.6139	36.3504
HIT 1519	32.5488	36.2669	33.3269	33.4891	36.8398	38.2399	34.0057	37.0136	34.2702	33.812	33.8704	34.1604	37.6103	33.2171	32.6455	35.5101	46.9225	43.7141	40.333	41.805	45.8454	51.6299	52.8471	43.6883	38.2605	40.5934	39.126	37.2974	62.8872	49.9812	56.0901	39.5683
HIT 152	32.6796	37.2421	32.9536	33.2719	37.3477	38.0984	32.8494	33.1027	32.4097	34.1912	34.7999	32.5866	32.6324	34.0777	32.4234	34.9698	41.5015	44.5962	39.7378	37.9872	41.1348	42.7155	42.2077	39.604	37.0069	37.325	38.2502	35.8006	59.2452	43.216	52.9911	34.7199
HIT 1520	32.1831	37.3559	33.0469	34.0611	36.0236	38.7884	38.304	32.8597	33.7973	42.1264	33.8981	33.8382	33.8191	34.4104	33.9611	35.6554	41.1329	37.7868	38.6087	39.5437	39.4171	40.5363	41.8353	42.8939	36.4636	37.3593	36.8586	35.3259	71.9073	44.8643	54.2956	36.0703
HIT 1521	32.1691	37.3691	33.2425	34.6175	35.9251	37.4514	35.3899	33.1179	33.0917	34.2301	33.4275	33.9008	34.4421	34.6729	33.4898	35.5563	44.7659	41.7478	40.2185	40.1942	40.4518	38.4046	39.0876	39.3967	37.8969	36.6653	40.2441	35.6406	59.8292	43.5998	50.7657	36.9609
HIT 1525	32.4708	37.5543	33.1573	32.3287	36.3038	37.0502	34.3148	32.4846	33.1463	35.3491	33.4086	34.3924	33.1864	33.7838	32.9652	37.1387	41.6414	39.9899	40.9759	42.3729	41.9301	40.3392	43.7366	39.0489	39.6761	37.9064	42.2027	37.2928	54.9555	41.5649	52.1812	36.4917
HIT 1526	32.6505	37.9384	33.3426	33.3644	36.9464	35.7916	33.8251	34.3239	33.2784	33.7029	33.029	33.8339	33.5215	33.4443	33.5277	34.7358	45.9866	43.948	41.9873	43.8423	41.1535	43.803	46.9029	43.8566	37.7821	36.8945	37.4445	34.339	65.7437	42.1395	52.7138	37.1961
HIT 1527	32.1186	36.4529	32.9078	34.2077	36.5149	37.0857	33.2889	32.7339	32.9186	33.3258	34.1957	34.1776	33.0953	32.4152	36.0807	34.9148	40.3638	41.4929	39.9843	39.4379	39.099	40.1603	38.8452	38.8318	36.4679	36.581	39.1144	36.3182	57.5394	42.4134	50.0802	36.6161
HIT 153	34.1361	46.4038	40.7592	38.2483	46.4694	52.2622	37.5342	37.4237	37.1991	40.4021	37.4988	43.4545	39.8737	38.2945	36.9546	50.7371	50.4734	48.9369	51.9373	47.3435	44.0427	54.3024	476.328	50.3188	40.2962	38.5192	43.1527	37.485	69.0155	42.6784	52.5826	48.4512
HIT 1531	37.7477	1719.62	82.0156	50.6294	124.37	82.6882	34.6596	33.9776	58.2614	49.5447	35.1819	34.6561	34.3105	34.0637	33.6258	37.5475	48.5494	47.4837	56.476	44.5901	42.6959	44.7031	44.4588	51.6968	43.9533	37.3143	40.2453	77.5346	97.7944	47.6345	52.804	40.5789
HIT 1532	32.0684	36.7695	32.5501	34.2908	36.3972	36.9702	33.9602	32.6099	33.1261	34.261	34.2839	33.4025	33.4554	33.5228	33.4326	35.4659	41.7683	40.0425	40.5136	41.0115	41.601	41.6116	39.5298	38.3307	36.9921	37.3927	39.0946	36.6649	59.5732	41.8306	49.336	36.176
HIT 1533	32.105	37.7199	32.721	33.7384	38.4871	35.7199	33.9656	32.579	33.1301	33.5566	33.8381	32.6978	32.7417	32.7759	33.1746	34.9944	41.69	39.3224	39.7966	40.0001	42.0582	40.5768	40.0231	40.3433	36.0583	37.7451	40.8718	36.2101	59.4296	41.396	50.2254	35.8082
HIT 1534	31.8468	36.2082	32.7094	33.7307	38.0394	37.0108	33.3205	32.1534	32.6727	33.4168	33.5089	32.6807	33.2479	32.955	32.6872	35.7994	40.1749	38.3843	41.1942	43.2004	44.6821	45.9282	42.0221	39.2794	37.1101	37.497	38.3597	36.4162	60.0885	42.0955	51.1255	35.9338
HIT 1535	34.1862	201.261	40.4819	36.8911	38.7443	42.0812	38.0695	35.2178	34.9661	37.3854	36.6171	35.9152	35.8325	37.4091	35.4975	36.7554	45.2864	43.987	43.0765	42.7228	42.3615	44.3419	45.3118	41.3411	38.9869	38.0311	43.4104	37.7406	63.1731	42.4659	51.8875	37.6255
HIT 1536	31.9184	36.6108	33.6805	33.5431	37.3498	37.3784	32.9552	32.9305	32.8457	33.2508	33.474	33.0705	32.8151	33.3035	32.8984	35.5747	42.3281	39.5901	40.3771	41.0462	39.516	40.3068	40.3312	37.9563	37.3036	36.4043	38.5621	36.8676	60.698	41.6029	50.5713	35.4684
HIT 1537	31.9871	36.8564	33.4051	34.075	37.6108	36.7728	33.422	33.1614	33.9374	34.2939	34.2774	33.9165	33.6877	33.6818	33.6076	36.2315	40.1294	44.5901	40.6393	41.1848	38.8549	43.1172	42.7847	40.1773	37.8606	38.4601	41.751	36.941	79.5907	50.5499	57.0531	36.4851
HIT 1538	32.3266	36.9355	33.5098	34.0447	35.0303	37.0797	35.4804	32.3458	33.1505	34.5618	34.2607	33.605	33.7582	34.0601	33.2931	35.0306	43.4495	41.0465	44.2122	39.9343	39.4152	42.0226	44.4859	38.8794	36.8968	36.2596	39.3387	36.7962	62.2041	42.6037	53.2752	36.6328
HIT 1539	32.41	35.71	33.3711	33.1003	37.166	37.0879	34.4449	33.2426	34.514	34.307	33.5706	34.275	34.0277	33.3893	32.9233	35.1378	45.1729	45.5992	38.3248	39.6477	47.4922	51.2758	38.8795	38.2213	37.1623	36.7447	41.634	36.5744	60.837	40.5858	50.8831	36.8185
HIT 154	31.9994	36.1157	33.0262	33.199	37.8067	38.4906	33.9817	33.3596	33.1448	34.0917	34.319	33.4619	33.2981	33.4554	33.5218	35.6618	47.195	40.7349	37.433	41.0029	42.7674	43.6815	53.9324	51.3579	37.5992	36.3405	39.9108	39.9106	61.797	43.0688	47.4891	36.6277
HIT 1540	31.7749	40.7477	32.8479	33.6286	38.2342	35.3861	32.1894	32.359	33.1916	34.0285	33.5342	33.1984	32.8805	34.2645	32.7365	34.6941	39.5231	37.5218	37.6179	38.5814	38.7588	38.7181	40.2964	37.455	36.3541	36.7077	37.272	36.207	56.4275	41.0598	52.5117	36.0309
HIT 1541	33.2546	45.1262	34.5295	34.3597	36.1105	37.6318	33.7102	32.9757	33.4343	34.3108	33.8305	33.9921	33.3285	33.6123	33.1537	36.263	46.2891	42.9884	39.863	40.2848	41.8958	43.1248	45.8135	37.9982	38.4871	36.2771	37.3016	35.6039	58.2419	42.2009	56.0586	36.5371
HIT 1542	32.4597	35.778	32.6463	34.1677	36.9829	37.3715	35.3132	32.4432	33.4331	32.6884	34.2533	32.6966	33.8853	33.2781	33.3911	34.452	41.2907	40.0722	41.3917	39.288	39.0455	40.1344	40.2969	38.9473	37.6082	36.5645	38.5419	36.8162	61.7696	44.2764	51.4123	36.2159
HIT 1543	35.7933	139.387	56.3975	46.5638	91.6089	67.2589	37.7524	32.6501	33.7042	47.7292	34.7798	36.1086	33.9402	35.0962	33.7049	35.6694	46.3474	41.5358	42.0157	41.7003	40.5588	42.0262	41.8295	47.3754	41.8389	36.0798	40.1757	66.0633	65.5012	45.0145	50.28	39.4374
HIT 1544	32.1955	36.6897	32.6187	33.7852	36.7539	35.757	33.8421	32.6019	33.3437	34.0115	33.9481	33.2153	33.5142	34.0636	32.384	34.7196	52.3817	48.1214	46.1067	45.0524	43.4622	47.2404	44.6216	44.4376	37.8663	36.1513	38.5853	37.8792	55.8469	44.1372	53.9795	37.908
HIT 1545	31.8154	45.7592	33.028	33.5564	37.4975	36.9398	32.1476	32.5448	32.7523	33.4711	34.1743	33.2481	32.905	32.6434	33.0641	35.5499	42.7672	40.8791	40.1916	41.6011	40.428	40.4232	40.9847	37.3426	38.033	36.0158	37.9878	34.7964	55.7302	42.0025	52.975	36.0646
HIT 155	32.3953	37.6029	33.653	35.5156	37.4783	37.5623	33.7662	33.3942	33.0069	33.7832	34.1699	32.9772	34.1858	33.4002	33.3052	37.6495	42.7764	45.6676	41.6468	43.2715	40.8444	40.7261	40.6562	41.2444	37.1466	39.3843	41.2061	36.0765	66.6355	41.65	49.6292	34.8565
HIT 1553	33.3887	54.8667	38.1684	36.5773	41.386	46.2237	40.9085	37.3615	34.9985	41.2999	37.2163	38.4204	36.4075	39.1364	37.5099	39.9248	44.8715	41.0557	41.7801	41.4122	44.1366	43.4284	44.4145	43.193	39.0434	37.3174	38.9357	37.7612	58.5385	43.4986	53.7416	37.9294
HIT 1556	32.0035	38.6102	34.2061	32.8668	38.3829	38.2878	33.4502	32.6029	33.2339	33.4162	34.5743	34.6222	33.118	33.0359	33.3143	36.7007	42.3075	40.9171	42.1133	43.2134	41.46	43.499	38.2418	40.6262	38.3417	37.7736	38.9461	36.9144	58.7232	42.2737	51.2961	37.111
HIT 1557	32.1383	36.2549	33.1444	33.1598	36.5553	36.7038	34.3555	33.3024	32.9287	34.5026	33.9389	33.0312	35.23	33.8261	32.7655	35.7524	38.699	37.2329	40.5038	45.4228	43.1808	41.0569	40.9308	38.4073	37.3656	38.3508	39.4066	37.0678	64.3304	42.9774	50.8177	36.5923
HIT 1558	31.999	35.9402	33.9181	34.5156	36.6753	37.628	33.9061	34.733	36.2014	38.8274	35.1034	33.5822	33.167	34.7125	33.0426	35.4074	43.9546	40.2177	39.9621	38.624	37.5989	41.6228	37.7702	40.049	36.5874	37.825	39.2012	36.021	58.5963	55.8936	48.929	35.563
HIT 1559	33.1977	39.3698	38.9786	35.1999	37.0812	38.4451	34.7624	33.5923	33.5923	33.2189	34.0284	34.3504	33.694	34.6031	33.8329	35.1268	49.9999	46.6162	44.8212	42.9805	44.3926	44.9104	43.023	40.8544	38.2048	35.3119	41.2032	38.0762	73.5464	44.23	51.4306	36.3495
HIT 156	54.9183	38.047	35.6708	40.1679	7267.55	58.896	33.9428	70.6912	33.8634	36.3059	36.3184	35.9031	34.2087	34.297	33.7165	43.7368	74.7106	53.7587	46.421	49.934	62.5161	209.031	3884.92	8474.23	40.9662	38.7407	89.4831	37.7914	97.2914	52.4193	56.153	266.353
HIT 1560	32.535	36.4954	32.7108	34.0708	38.73	37.7929	33.8891	32.3869	33.39	33.5547	37.6836	33.9076	32.7813	37.3117	31.9627	35.7981	41.8585	41.3782	40.1368	39.6442	38.6957	38.8458	41.7649	39.865	37.9611	40.6975	43.2568	36.4571	91.2759	49.8756	53.855	34.3973
HIT 1561	32.9484	35.8902	33.1798	33.6594	36.3091	37.1422	32.9887	32.6087	32.936	34.0258	34.6934	33.1974	34.0086	33.485	33.456	35.8391	48.1677	52.8084	42.3631	41.2951	40.6689	42.827	49.074	40.2686	44.0454	37.615	42.7043	38.9753	59.0754	44.2682	54.2602	36.9944
HIT 1562	32.501	36.7454	32.922	33.5569	35.9083	36.4016	33.3873	32.2476	32.9719	34.1168	34.7487	32.8292	32.8792	35.4115	33.318	35.5321	39.3513	36.5662	37.0494	40.018	39.0576	43.0113	39.3618	37.9514	37.6996	36.3261	39.5192	35.042	57.4375	40.3059	45.4945	34.8362
HIT 1563	31.6178	36.4314	32.6647	33.9292	38.4443	37.5696	33.5353	33.4433	32.8062	35.5141	34.3328	33.6093	32.9729	32.8016	33.8879	34.8582	75.4958	45.3297	43.7194	38.1772	37.1538	41.3295	40.8337	43.9235	38.9377	35.5547	40.6141	36.329	54.2554	45.2934	58.3185	37.0391
HIT 1565	32.6402	38.3344	33.6409	33.4247	36.2752	39.3701	33.4172	33.255	33.3498	34.3181	33.8101	33.8751	34.4937	33.9513	33.5916	37.1434	45.7806	45.0517	43.0519	41.7044	42.0053	45.8352	48.325	38.6338	38.0551	37.5073	38.7166	35.4386	47.4167	39.2471	44.3601	36.1485
HIT 1567	33.6335	36.7139	33.2002	33.4126	36.9827	36.9686	33.5416	32.9504	32.9791	33.9631	33.4264	33.1705	33.5114	34.0503	34.1227	35.4931	42.4888	38.6892	39.6517	40.0698	39.204	40.9238	39.5013	39.8134	37.067	37.5541	39.9398	36.6422	63.782	42.6931	49.784	35.4359
HIT 1568	32.3127	39.381	33.2269	33.8637	36.715	36.6821	34.4988	32.4794	32.8754	33.561	33.9722	33.8745	33.7549	33.0741	33.0239	35.8308	43.3072	38.6005	38.7957	41.0786	43.0486	41.4219	41.3111	38.3401	37.2232	36.8403	39.2732	35.7622	59.3332	41.4184	52.0848	36.3818
HIT 1569	32.7947	37.2548	34.1012	34.3777	36.7314	36.9614	33.9875	33.3919	33.7938	36.6748	34.9117	34.1627	33.8362	34.0822	33.4346	36.0256	45.3294	46.7622	43.5604	40.9747	43.7857	44.1425	40.6915	39.3187	37.7782	38.3496	38.392	36.8764	61.1512	44.0618	52.4514	36.5928
HIT 157	32.48	37.0541	32.697	32.916	76.5436	37.5219	33.1664	32.3011	32.9366	33.0553	32.7605	33.2365	34.2918	33.2574	32.2333	35.9757	49.7111	45.2929	40.007	41.3828	46.5095	43.0162	48.1337	40.913	41.3181	38.0498	41.3643	36.6236	83.9686	42.8159	55.6471	37.343
HIT 1570	32.2507	35.2804	33.2922	33.6379	36.1094	37.2505	34.3191	32.7601	32.728	32.9223	33.1158	33.7009	32.828	33.2695	33.2583	34.9821	43.7901	40.8384	37.3395	39.0591	44.4621	42.8908	40.4211	38.2828	35.1919	36.5547	39.992	36.1435	56.3641	41.7105	52.1693	35.8074
HIT 1571	32.2859	36.1721	32.2951	33.4594	37.2641	36.5947	32.9974	32.6358	32.6303	33.1956	32.8803	33.4508	33.695	33.4086	32.3386	36.6257	44.6271	41.3085	42.0334	41.6381	41.8862	45.1469	41.7551	42.3314	37.5851	37.2679	39.0768	36.0026	56.2468	40.4366	49.0576	36.6084
HIT 1572	31.8043	38.1821	32.7555	32.4969	38.3149	36.4845	33.2936	32.6467	33.5406	33.6101	33.1998	32.9906	32.7088	33.598	32.4559	34.5347	40.7887	38.1744	38.2246	39.9197	42.8217	44.9545	37.9787	38.4158	38.6981	38.0861	38.9996	37.8883	54.9487	40.6281	44.7928	36.1664
HIT 1576	32.2779	37.0467	33.6236	32.8249	37.301	38.4349	34.0787	33.2537	32.9729	33.3825	33.8594	33.049	33.069	33.1232	33.1983	34.9604	45.0559	40.9242	38.5036	39.7667	42.8229	39.117	38.1839	39.5622	36.7442	37.4482	43.2611	34.8448	72.1032	43.5193	50.1095	35.8776
HIT 1577	32.1489	37.0406	33.8629	35.7708	35.9007	37.0311	34.9042	32.8955	33.0984	34.2822	35.972	33.4199	33.6543	33.6033	38.6367	35.6773	42.3853	37.2041	41.5534	39.2482	40.3371	39.0286	37.304	37.2596	36.2217	36.5681	36.9681	33.2543	59.9262	41.8303	47.9867	36.7266
HIT 1578	32.5638	37.5082	33.2651	33.6824	36.0748	37.157	33.9915	32.3692	32.9118	34.3063	32.8991	33.7099	33.48	34.0301	33.2161	34.6008	41.2421	42.6949	37.8993	40.5845	40.5031	40.8724	41.0684	40.4735	38.3373	38.4238	40.1662	35.9489	63.7271	43.4453	54.1824	36.6659
HIT 1579	1134.87	1831.21	7591.01	1258.12	1232.42	82.0292	95.6794	39.7891	40.447	45.9642	86.9361	38.3783	35.535	80.6042	40.717	41.7051	332.188	64.0867	99.5249	441.743	281.174	86.0523	60.1579	50.3964	44.4445	75.9761	49.8784	72.941	12824.3	130.51	58.5772	231.357
HIT 158	32.0942	35.6928	32.9686	33.8032	36.1805	36.2724	33.6898	32.6172	32.6949	32.7969	33.9122	32.9899	33.33	33.1926	32.1713	36.2029	42.0043	40.4252	38.6787	40.2502	43.6267	40.1712	41.2616	42.3837	35.8316	36.3739	40.2761	36.6109	78.3741	44.6389	52.0707	36.1239
HIT 1580	32.4904	38.7927	33.2217	33.0668	37.8087	36.3531	33.2126	33.5977	34.9685	35.5445	33.1346	54.7882	35.5658	35.0453	34.0109	44.5594	39.9776	40.417	40.1813	42.2871	38.8842	42.0253	41.2542	37.4687	38.3027	36.3682	40.5863	37.1027	65.5707	43.8626	46.6597	34.9182
HIT 1581	560.081	6668.69	2620.11	1387.98	389.318	78.7155	1865.36	1022.13	1764.28	1881.41	1445.3	1307.23	891.427	1407.92	829.845	1845.24	3843.16	2396	3587.62	1907.39	1514.33	1965.52	1587.95	2103.25	1513.58	1026.99	1369.31	2224.15	3312.94	1580.83	1395.66	3068.49
HIT 1582	33.1598	38.1257	34.015	33.7968	39.1641	40.3906	34.5964	33.1867	33.4279	34.674	34.438	34.1438	33.9564	34.3226	33.9801	36.3721	46.0916	42.7175	39.8776	44.0894	41.5629	53.1915	45.8246	41.8885	37.3209	56.3567	39.0163	37.9751	61.1301	44.7598	51.7205	123.193
HIT 1583	32.1555	36.5461	32.7076	34.2012	36.6626	36.2434	34.4353	32.7866	33.5538	34.144	34.1978	33.8405	33.4487	33.4009	32.9922	34.1499	43.694	40.4329	41.6832	44.536	40.2511	39.4791	40.1479	41.1851	38.1924	40.9938	40.2474	35.86	58.1714	42.1803	50.479	49.835
HIT 1584	105.73	39.8232	35.6796	40.2455	55.9349	37.8386	34.7503	32.8383	33.4969	33.4057	33.9008	33.0926	32.935	33.8982	33.035	35.0625	46.0677	55.2554	38.2211	44.7041	39.61	45.2457	39.5422	40.8275	37.7753	66.2222	42.8462	37.1378	62.9991	40.9075	49.6605	172.052
HIT 1585	42.3994	44.1713	37.1959	37.8601	40.2407	42.6594	37.6329	39.5443	40.6859	44.9456	41.798	40.0387	37.5272	42.7418	37.5149	40.6983	380.256	67.783	148.205	56.2992	64.5848	247.578	83.5049	66.8988	90.1654	38.6276	52.169	77.8317	65.5831	49.6652	70.4871	53.487
HIT 1586	32.0261	37.6529	33.1742	33.3603	37.8722	37.5451	32.9058	32.4197	32.9806	34.0619	33.7415	32.996	33.3875	32.382	33.7017	35.4157	43.7194	38.4564	39.1964	41.1668	40.526	39.6504	39.497	37.3492	37.6994	36.7538	38.6266	36.004	58.511	41.7175	54.6253	35.9822
HIT 1587	37.6853	37.4935	33.3806	33.9023	37.7228	36.204	35.3329	34.3677	34.1659	35.1666	34.4758	34.8618	33.9324	34.829	34.4434	36.4134	335.542	47.1945	95.5916	46.4714	51.5795	198.106	69.9948	47.0026	73.4771	41.5215	49.5754	49.407	62.785	43.8686	64.114	39.9896
HIT 1588	38.5934	38.5499	41.8567	40.7573	38.5173	37.597	38.728	42.5963	41.1454	698.24	44.8001	221.888	35.1406	37.4651	130.916	36.5919	80.493	49.083	57.3366	48.8735	44.8914	73.5374	45.5607	45.7123	45.7918	39.6464	41.9445	47.2131	72.8487	50.967	56.7308	42.2017
HIT 1589	33.8705	37.3488	33.0975	38.1131	39.2927	39.0044	35.69	33.3195	34.5852	45.707	44.8365	36.4369	34.5978	34.8356	33.2287	37.1685	49.8819	52.797	43.9029	43.8988	44.565	45.7263	42.6575	41.7011	39.9039	38.2864	38.9279	38.7141	66.7745	46.5058	51.139	36.8818
HIT 159	39.8528	39.2051	33.6354	34.7193	72.9876	38.4148	34.6263	33.2469	33.8239	34.479	34.7566	34.3177	33.6828	35.0551	33.399	36.7319	73.5299	54.6206	46.6248	78.1914	2528.28	67.2974	48.3689	83.6411	44.2276	73.0689	173.918	94.9505	16070.8	75.9716	85.6094	65.1595
HIT 1590	38.0307	37.6194	33.2979	35.6165	43.1296	37.2948	38.2102	33.0158	33.2002	36.3019	34.6574	34.3407	33.1672	34.6744	33.0246	37.7685	79.1271	45.5106	65.3241	48.1964	52.4705	68.8123	45.3731	45.7254	2226.43	78.2197	44.7002	59.9764	58.0797	51.0911	68.8947	50.772
HIT 1591	32.3558	40.3707	32.5905	35.6255	37.0859	38.4733	34.7263	33.7568	35.1852	35.2993	34.6679	34.234	33.9897	34.8187	33.9648	36.3226	53.4928	45.8694	43.8133	42.5268	46.0441	40.8342	45.9235	40.899	38.7024	39.5896	37.0303	36.7019	57.9609	41.5596	53.1174	40.0152
HIT 1592	32.1164	36.6838	34.0701	33.4205	36.4284	37.4415	32.6498	33.1876	33.3554	33.2813	33.0857	34.1119	33.3008	33.7783	32.6506	35.1043	38.3679	37.6198	37.1818	40.3133	38.0543	40.3235	38.6479	39.2776	36.1386	36.7287	46.5113	36.4153	69.1097	42.5058	53.7333	35.7094
HIT 1593	32.0235	35.7518	32.8369	33.4042	36.6742	37.5336	33.2753	32.9714	32.1056	32.8424	33.5079	32.5956	32.9795	33.1537	32.809	35.436	42.8501	40.7629	39.1156	42.7355	38.6755	40.3798	38.115	39.3604	36.9773	37.905	41.0986	37.781	63.1354	43.421	53.4122	36.4438
HIT 1594	32.0271	37.0926	32.7167	33.4895	37.9134	38.0374	33.9594	33.6344	33.9246	34.9193	34.344	33.222	33.8343	33.7159	33.4512	38.1297	43.4779	39.2661	39.9994	41.2987	39.4216	41.4497	41.0792	38.8482	35.8636	36.1443	39.7759	36.5542	53.4954	41.8173	47.2131	36.2115
HIT 1595	70.0673	128.907	442.851	455.406	41.0462	39.6027	3210.57	996.735	328.373	1464.81	814.813	1181.57	753.362	216.828	694.034	418.713	40.2647	36.8383	36.7489	42.2151	40.9285	42.0269	45.1507	38.5214	37.8251	38.1137	40.5647	38.2504	732.378	50.7714	56.0032	35.8425
HIT 1596	32.8966	44.6425	32.4518	32.2451	35.443	37.6214	33.821	33.4387	32.7356	33.9454	33.7481	34.4176	34.2008	33.4091	32.7873	33.9347	41.9604	40.3816	37.6487	41.6071	41.6418	41.2947	39.4459	37.7516	36.4939	36.2593	40.4472	36.6718	60.0871	42.3564	51.3116	35.5697
HIT 1597	33.6068	42.1135	238.523	36.7226	40.298	44.0873	38.9132	37.429	38.8675	44.2239	38.1868	47.1613	38.4235	37.374	36.8672	49.0764	50.7301	52.2422	47.2718	86.9959	48.5078	50.4214	46.6248	67.4534	71.9925	37.7658	40.533	38.6183	60.0632	91.5428	63.1182	45.1125
HIT 1598	32.0215	36.8134	33.9564	33.2096	38.0177	37.0998	33.2547	32.6938	33.1631	34.2563	33.4294	33.8227	33.0771	33.5334	33.0569	35.8983	44.7029	38.5715	39.9115	39.7496	42.2141	41.228	40.6554	42.2425	36.8383	38.2642	40.6945	36.2279	64.3738	47.8547	50.3965	36.3036
HIT 1599	32.4422	37.2554	63.4861	33.0823	36.656	37.0494	33.2289	33.8728	33.5509	34.0579	33.9614	34.2754	32.9389	33.6881	32.4612	35.5693	40.5005	36.6407	39.1224	42.4778	41.1622	42.2087	42.8871	42.3909	39.5251	37.0476	40.1634	35.8577	56.4442	46.8965	54.6006	36.949
HIT 16	32.3436	37.0972	33.0202	33.6454	36.8962	37.304	33.4163	32.7457	33.083	33.4442	33.6258	33.1163	33.8193	33.6942	33.4032	35.3743	47.9424	1212.36	85.7467	803.624	2039.32	221.528	88.2286	40.5631	50.9193	37.274	39.7849	38.5785	1170.02	43.3797	1213.38	36.9564
HIT 160	32.0534	37.1341	32.784	33.9971	38.2933	37.0288	33.8224	32.8126	33.1071	33.8358	34.0858	33.414	33.1816	33.4764	33.6892	35.9042	44.1866	39.3346	38.4368	39.5535	40.037	42.4918	41.5192	39.5151	37.8627	37.7917	40.0688	37.8518	61.0735	42.1193	50.1335	35.5324
HIT 1600	32.7409	129.431	192.491	35.763	38.0003	38.3657	36.5605	33.0649	33.1479	33.634	33.2776	34.27	33.2655	34.0482	33.5918	37.3252	43.8371	37.8157	39.7101	60.2073	41.4373	68.2878	68.145	44.1363	61.2969	39.1152	42.2435	38.5606	59.755	67.223	60.7503	45.2959
HIT 1601	32.1465	43.5378	38.6346	32.8047	36.9615	37.4833	33.6892	32.7797	32.7617	33.7033	33.791	33.7155	33.3595	34.1286	32.9729	35.7797	43.9335	39.3411	40.051	41.5613	38.2053	42.0959	40.508	38.8624	41.1444	36.8509	37.85	35.1264	55.8115	44.9143	50.0519	36.6143
HIT 1602	46.5217	42.4361	147.105	35.0756	40.993	38.1065	35.3559	35.9436	111.004	36.1482	34.6453	44.8227	103.6	33.8918	40.4439	52.1984	68.9832	59.9739	64.5782	91.0426	73.3595	169.796	197.195	45.6521	119.448	45.4243	40.704	43.3654	85.3597	47.6199	63.1589	43.8619
HIT 1603	2016.78	797.395	982.994	928.787	974.34	55.5476	3057.56	54.9863	165.795	172.235	86.7727	1092.17	816.798	136.016	330.47	574.538	129.523	84.4538	123.508	63.8766	166.912	98.5872	111.808	62.0645	68.6741	44.1846	56.1882	55.9286	460.689	69.2813	82.7458	76.655
HIT 1604	32.1201	37.438	33.1952	33.3358	37.974	37.7088	34.1611	33.1914	33.3655	34.7315	34.2295	33.3918	33.5171	33.4175	33.0539	35.2359	44.6198	41.4799	41.5407	41.9353	41.5744	40.2837	41.4011	43.6951	38.8423	38.8981	40.0125	37.9637	69.5473	44.9679	53.7542	40.6024
HIT 1605	31.9003	39.1654	32.9044	33.2039	37.892	37.7209	35.3476	33.1504	32.8289	33.2063	34.455	34.0428	33.633	33.541	33.7091	36.3769	42.0873	43.8095	41.8588	41.245	40.5874	40.2854	41.8676	37.265	36.6846	36.5763	38.4328	37.3157	55.2074	41.7661	49.5812	35.2405
HIT 1606	42.6378	492.622	192.943	15355.5	51.4103	38.9505	53280.7	17227.6	3293.92	20982.1	14335.7	5962.78	12820.1	5472.93	14626.3	96.3027	45.3116	42.2592	42.7065	44.0984	41.6488	42.2354	40.8869	42.116	39.2958	39.6306	40.246	37.5709	78.1973	101.722	50.6431	37.4801
HIT 1607	32.3888	38.1423	34.617	33.687	39.5144	39.5243	34.5695	32.753	33.9677	34.6743	33.2608	34.2063	34.0197	34.662	33.7264	35.8655	45.7105	44.3026	42.8609	39.5411	42.6759	43.4437	43.6516	43.4341	37.9673	38.3523	39.5991	37.1919	72.4957	43.5489	47.7236	36.9002
HIT 1608	32.2687	40.0472	33.3086	35.2223	37.768	39.293	50.54	34.8337	34.2691	36.9428	35.3499	37.2356	34.6606	36.7239	35.1167	39.2715	43.9939	40.3786	39.7021	40.2003	40.5127	40.05	40.2548	40.8755	37.7789	36.3604	42.366	35.4731	60.4112	42.0004	49.9612	35.8394
HIT 1609	1967.79	889.148	850.063	1731.47	1135.21	49.7014	9507.19	88.274	142.102	971.8	373.635	2292.94	3053.34	776.551	1430.66	504.565	91.8161	78.5099	92.9024	60.7952	108.341	75.4266	99.0426	59.3197	69.8417	43.7181	53.431	55.9275	337.642	68.8745	77.7655	61.9434
HIT 161	42.9149	59.2036	100.515	63.1168	43.4384	44.1725	38.1062	35.7187	37.7921	39.8531	37.9135	38.1198	36.6688	36.8451	35.3237	40.3263	56.8177	48.7974	51.2495	49.6891	48.2114	54.6959	144.452	52.334	40.1372	39.094	42.3936	38.3279	66.0723	46.4156	55.4616	41.0056
HIT 1610	31.74	35.7749	32.1817	32.8958	36.8136	37.8731	33.226	32.3978	32.6603	34.1039	33.456	33.7347	32.7528	33.0032	32.1259	34.8249	41.6789	36.8767	36.4567	39.1112	39.2686	38.7094	43.4123	39.1046	37.1218	37.1239	37.8717	35.1857	58.413	42.4436	55.1456	37.0867
HIT 1611	32.9544	44.8986	35.7971	47.7387	44.5617	50.7348	178.581	33.465	35.5345	42.417	38.3167	52.6509	78.3045	41.7168	46.0858	39.6832	45.4981	44.9851	44.2156	42.0045	43.5523	44.0321	42.8556	43.4335	37.6231	37.9605	38.7071	36.5706	62.9732	42.8196	50.3559	36.0698
HIT 1615	69.2326	50.0922	63.0538	62.421	49.8049	35.6628	1375.65	35.0204	37.1235	61.8821	41.2785	167.37	407.811	51.9826	82.1967	65.5072	45.955	41.325	40.7467	40.9621	44.8926	43.8678	39.6577	40.8505	37.5516	36.8621	43.2471	37.8368	60.9929	43.0111	45.5516	37.2096
HIT 1616	32.1663	37.7373	32.9053	33.644	39.747	37.7148	33.752	32.9438	34.0863	35.2702	33.453	33.2882	33.562	33.6703	32.9748	34.98	44.1066	48.5368	40.9969	42.6273	42.0398	42.5894	41.6344	40.7353	37.1531	36.6446	39.2913	35.605	59.134	40.1231	52.6312	37.0336
HIT 1617	32.0458	36.5298	33.0323	33.319	36.1245	38.3397	33.5253	33.0822	33.1789	34.5247	33.3811	33.4875	34.5274	35.29	32.71	36.2188	42.5397	39.8114	41.6053	41.1699	42.3387	41.7875	39.3006	40.9378	36.2919	36.5227	39.0985	36.3104	61.7406	42.8089	59.766	37.2993
HIT 1618	46.82	1316.87	113.41	104.112	59.3735	38.0794	3298.23	290.518	3961.34	814.76	83.1066	19449.6	1028.43	485.361	706.113	18024.5	48.8816	67.2577	39.0668	40.5957	41.0269	39.285	42.6201	49.1506	49.3029	36.8831	38.7631	42.0733	62.7557	60.2001	97.6101	35.6416
HIT 1619	49.8766	85.6563	276.899	259.872	39.2038	38.1554	1852.48	657.491	204.597	732.307	419.734	651.747	530.955	120.016	390.421	204.96	42.8766	39.9102	42.4297	43.0929	38.5088	41.7617	40.2675	38.0648	38.3546	36.9439	38.8221	37.6592	114.08	43.2387	51.7146	36.677
HIT 162	61.0808	48.9977	170.99	92.846	3216.71	46.4427	34.3444	36.0756	34.8631	37.4689	36.7409	36.562	34.0204	33.9988	34.1146	42.9352	326.931	57.2901	44.5204	45.3419	78.1935	81.1319	228.489	169.318	65.1496	110.35	573.244	39.3378	349.573	94.6455	75.4587	49.2223
HIT 1621	2213.21	867.633	968.952	687.103	883.685	53.4882	3270.39	77.8464	138.181	162.352	78.6798	1502.38	1100.65	127.69	274.586	678.437	135.208	87.3757	116.437	65.0368	148.556	97.1657	117.584	69.4186	73.5348	48.7547	70.1883	64.431	414.983	74.8599	81.4378	79.7644
HIT 1622	31.8271	36.6741	33.7412	34.2468	38.4487	38.9039	33.8708	33.3032	33.275	34.3091	33.6263	33.9288	34.4395	33.8512	33.6196	37.0347	47.15	41.2033	45.2667	44.9755	38.6461	42.6536	42.6787	39.6787	40.377	36.7831	42.6867	36.913	61.4674	43.2259	53.7013	37.389
HIT 1623	32.6168	40.3435	33.5474	35.5287	37.248	38.7883	35.4276	32.5071	34.5742	33.4664	34.1976	33.829	33.3935	33.4445	33.5169	34.9532	45.295	39.6251	39.9392	41.8369	39.6671	41.6581	39.7439	40.2367	38.0357	37.2047	39.3391	37.5259	57.888	41.776	48.9178	35.8357
HIT 1629	32.2869	36.4134	33.2602	33.9642	39.5611	38.3026	33.7031	32.7118	32.8281	33.6661	33.8417	33.4639	33.2477	33.5573	33.4514	34.9296	45.0541	42.8995	41.6542	41.9547	42.7089	44.5565	44.6058	41.4809	37.5257	37.1205	39.1437	36.1775	60.2581	42.1617	52.9991	36.3724
HIT 163	32.1295	36.6116	32.8882	33.3862	37.7561	37.1874	33.8481	32.7122	33.0078	34.0358	33.8582	33.6285	33.3596	33.42	33.3953	35.41	44.1031	41.1073	40.1433	40.5559	40.3595	54.6555	253.366	46.3547	37.9615	37.1391	39.4883	35.846	61.4341	43.0017	51.7766	35.8963
HIT 1630	31.7698	36.038	32.3986	31.7994	36.6596	37.3388	33.3034	31.9953	32.7978	32.6712	33.5293	32.901	32.934	33.1016	33.8347	35.6233	46.7705	47.5722	45.5489	39.5407	38.3531	43.4483	42.624	41.2233	38.447	43.4965	48.1265	36.8617	63.2866	44.4011	56.3685	35.9789
HIT 1631	33.1593	52.7661	35.3759	34.1868	40.1662	44.3987	35.0042	34.1885	34.0298	34.7133	34.4042	33.7364	34.617	34.0652	33.2204	37.9223	47.1537	40.4791	39.991	42.4367	45.1306	41.3748	39.4142	40.5661	37.9845	39.9733	39.3787	38.751	62.2634	41.9828	51.091	35.3849
HIT 1632	31.8223	37.6622	34.3348	33.4667	36.8129	37.8063	33.9651	32.26	32.47	33.5969	33.6138	32.9226	33.0847	33.0315	33.2466	35.117	46.3388	42.2794	49.0852	48.5927	45.4731	41.6231	45.1116	45.9919	38.7424	36.9114	39.154	37.1105	59.1633	43.0859	53.792	39.7414
HIT 1633	34.1375	37.176	33.6663	34.1927	36.6008	36.8822	34.1536	32.3987	35.9874	32.7359	33.5336	32.7633	32.7865	33.2386	33.2064	36.0821	43.003	42.2123	41.1926	40.438	40.5723	38.4878	42.1981	39.1567	37.2672	36.7914	39.5988	37.2339	63.0979	45.9004	55.6134	36.573
HIT 1634	32.5085	36.2253	33.298	33.2319	36.5298	37.1605	33.5317	32.6317	33.3109	33.9021	33.206	33.5159	33.2242	33.667	32.3298	35.0611	43.3223	39.2558	39.6322	39.1962	40.6306	42.2521	36.4488	37.0257	36.8328	38.1101	40.8275	35.807	63.4149	44.0009	50.1051	35.8123
HIT 1635	41.8143	58.4307	92.5953	91.7101	60.6669	62.6517	80.1238	40.1719	44.5513	50.876	43.864	53.8335	50.6272	46.2399	44.7482	45.8614	65.0172	61.1364	55.05	52.2769	53.2175	53.9267	53.5127	51.727	43.8769	40.1381	45.3213	47.9208	91.0718	52.546	72.6767	51.1462
HIT 1636	35.8956	45.2282	62.5858	53.1532	56.9123	37.0702	68.5686	41.8195	37.6464	45.9	48.7479	38.9741	39.338	53.7661	40.0683	38.6658	138.987	208.52	205.279	46.9727	45.1358	52.9447	49.7619	45.41	87.7636	245.911	41.865	76.2381	314.224	46.3286	163.546	61.6524
HIT 1637	38.5568	40.9528	64.6569	34.3384	38.835	36.905	36.817	34.3012	33.9721	35.6974	34.845	33.8127	34.0477	34.5578	33.3302	38.4313	54.125	52.0398	42.7307	53.6805	50.0818	46.5403	45.8439	40.9761	37.819	38.3796	38.522	38.2657	8818.14	65.6707	47.5879	36.887
HIT 1638	33.2312	45.1651	57.9961	56.396	41.5539	37.1851	34.5266	32.9423	33.1489	34.3013	34.9687	33.4577	33.369	34.2377	34.3327	37.2137	42.4775	41.5645	44.6791	40.0078	39.7862	39.355	39.7413	39.9057	38.2515	41.1565	40.635	37.265	98.9934	46.1785	51.6859	37.6
HIT 164	32.2213	36.7013	33.0496	33.7449	36.5524	36.8984	33.1247	32.9618	33.088	33.7373	33.7361	33.2497	33.3506	33.947	33.4475	35.0764	43.2316	41.7092	40.8893	42.0836	41.2507	49.0323	179.845	44.2626	37.4251	36.6882	39.4809	35.7969	58.7027	43.8453	52.1817	36.5203
HIT 1642	36.3605	542.629	47.6805	39.6574	40.3452	47.0747	36.6105	37.529	35.0778	36.999	37.6469	37.9574	35.9092	37.5732	35.7837	39.7992	55.7247	52.1948	51.2892	43.3682	46.2566	51.1226	46.0896	45.4069	42.0618	57.3141	58.1514	36.8012	63.9682	45.0951	313.643	39.8344
HIT 1643	32.7838	37.3504	32.7767	33.8209	36.7957	37.5211	33.6352	33.1927	33.0147	33.6292	33.4266	33.5314	33.6851	33.5205	32.9628	35.5197	43.1968	40.9134	41.3507	42.4011	41.6348	39.784	41.6818	39.5645	37.1679	37.0367	40.6457	35.0923	56.7548	40.8643	60.5749	37.2962
HIT 1644	55.8298	56.043	69.8924	42.7292	66.5126	44.8771	48.1958	46.8343	42.2002	50.1029	47.6498	83.4797	385.992	42.9289	47.7248	110.669	121.108	121.548	140.223	227.363	143.662	87.1774	247.636	75.907	408.408	88.2942	61.1394	78.9748	126.943	71.1642	124.857	70.2113
HIT 1648	32.3049	38.0136	32.6491	33.1163	36.7635	36.2829	33.5137	32.592	32.9003	33.9399	33.7274	33.4165	34.0042	34.9178	33.2059	36.1797	44.6821	35.0975	37.4791	40.9774	45.2563	41.6941	39.3941	36.677	37.8325	36.8562	39.7971	36.0649	57.7629	39.9033	48.7074	34.6509
HIT 1649	32.6934	48.3765	34.437	32.7361	38.809	38.0427	33.1213	33.5353	33.055	36.671	34.2252	34.4854	33.5739	33.4961	34.056	36.1609	42.8327	45.3739	42.4045	40.8461	40.281	41.9425	36.6841	39.6526	39.0308	34.3046	39.0593	36.2217	62.716	43.2837	54.3474	35.9426
HIT 165	32.5121	38.9271	33.3866	34.1003	37.7193	37.5834	35.4387	33.8132	34.4747	35.7624	34.5947	34.3636	34.9228	35.2832	34.7513	36.9642	46.352	42.2741	41.585	41.6164	44.2364	199.641	3520.44	71.9339	37.0359	36.7311	38.5743	35.7827	63.2539	44.098	54.5705	37.4304
HIT 1650	32.1964	36.1248	33.1172	33.4441	37.3691	37.6144	33.2603	32.5831	33.7429	33.8209	33.9419	33.1773	34.5365	33.4887	33.3029	35.9397	49.8239	47.7572	45.2116	44.8633	40.8688	52.2493	45.5174	46.1396	36.9766	36.9934	39.5083	39.1785	60.5653	44.2715	53.995	37.5064
HIT 1654	31.7634	38.2225	32.8521	33.5299	36.0575	38.1716	33.6709	33.0423	32.9074	34.4078	34.0209	34.0474	33.5146	33.427	33.3551	36.2272	44.7798	39.1621	41.1866	40.4056	41.4576	43.7283	42.0266	39.2811	36.5087	36.8955	39.2503	36.3706	61.7416	43.5045	48.9316	34.9515
HIT 1655	32.0845	48.7964	34.3026	33.1213	38.1506	38.8745	33.3105	32.859	32.5724	33.4043	33.3386	33.3532	33.3991	33.4839	33.8434	35.8674	45.2752	40.6608	43.0529	40.6854	36.9235	40.5509	41.0147	41.5728	37.8858	37.6813	39.0706	36.7558	64.7212	40.3683	48.6946	36.2379
HIT 166	32.0186	35.9248	32.8746	34.7632	37.0113	38.0388	33.5805	32.4957	32.6443	32.9282	33.456	33.0667	32.1772	32.8964	32.9803	36.2516	41.53	36.8327	40.3994	45.1429	39.3468	55.7012	37.7903	39.1629	37.9564	38.2942	38.8858	36.2732	63.8456	42.0309	48.3393	36.2541
HIT 1663	33.4832	51.9297	39.77	39.2866	42.5857	41.2063	37.5052	35.0485	35.6273	39.0717	35.9376	35.4552	34.7299	36.3598	34.8999	37.4194	62.7765	57.2838	52.3692	52.1094	47.7203	55.7514	49.504	50.9283	41.2912	39.5841	42.5428	40.7417	87.4532	44.6816	50.4313	42.7573
HIT 1664	32.0898	36.9656	32.8327	34.9558	38.3409	37.7905	33.5623	32.7999	34.4535	34.6034	33.5978	34.5057	34.1921	33.4533	34.6182	35.5924	43.6301	41.1903	42.6319	40.8891	43.5642	42.0962	44.6692	41.8334	37.4092	36.1065	40.6782	37.1055	63.2364	43.6195	53.0827	36.9821
HIT 1666	32.559	36.7617	32.881	33.2049	36.358	35.84	33.8508	33.2366	35.415	32.0916	33.5957	33.6507	32.7797	33.4622	33.3525	35.2239	46.2916	42.5558	41.1416	40.7047	38.5396	41.8481	42.5603	40.3737	38.5653	37.3413	37.4146	36.1823	61.5287	40.0285	50.4245	37.0277
HIT 1667	31.9989	45.7363	33.1393	35.1197	37.0167	37.9392	34.0162	32.6022	32.8946	33.9088	34.2233	33.5999	32.7043	33.9751	32.4418	35.6331	42.2641	43.3328	38.8136	42.5973	41.9004	42.6219	36.9941	40.2292	38.5273	36.9308	40.515	36.6118	56.4481	42.2921	49.3956	36.0613
HIT 1668	31.9344	36.4797	33.459	35.5748	36.6875	37.057	33.5998	33.0418	34.02	33.7893	33.9642	34.0192	33.3185	34.0916	32.6605	34.6642	42.3736	40.0051	38.6809	41.626	42.358	44.1013	39.6356	38.152	36.064	37.5188	40.209	36.0493	60.475	41.8274	48.7972	35.4866
HIT 1669	240.169	275.581	166.637	1245.05	103.463	39.514	91.7595	59951.1	20282.6	29047	16232.7	1325.78	5408.97	53582.4	37112.7	38.2175	48.6277	56.1034	48.3541	54.6286	46.9017	47.8059	45.2073	45.6823	40.4499	38.0997	41.4603	41.7374	443.566	940.389	56.3785	41.5537
HIT 167	32.7919	39.0134	33.8723	34.3812	38.0405	37.7526	34.3566	33.7962	34.0428	38.6873	34.3094	35.9267	34.1709	34.294	34.7252	36.3522	82.1781	46.5637	43.764	42.4071	41.7758	139.663	2079.52	4620.88	47.4989	38.4966	39.5536	35.8823	62.8221	48.0911	55.3586	158.213
HIT 1670	32.5376	37.5155	33.314	34.1403	37.1677	36.958	33.449	33.2549	33.3573	34.1668	34.1033	33.1055	33.4313	33.4537	32.5555	34.5661	44.6746	41.2146	39.9355	44.2903	43.2847	43.2688	41.8755	41.3653	37.4141	37.2566	40.9126	35.126	57.8358	41.6605	51.7983	37.1509
HIT 1671	32.213	38.5419	33.4164	33.9456	36.961	37.7845	34.0812	401.815	182.047	128.462	49.1729	40.2386	35.0462	40.8363	181.811	36.7725	43.221	41.1938	38.6239	40.1177	40.3305	38.4673	38.5227	38.1931	37.1341	37.7052	40.3249	34.5594	56.746	42.3895	48.3662	36.0345
HIT 1672	32.3798	37.9931	33.5926	33.8458	37.5908	36.4055	36.0258	34.8995	34.4943	37.9175	34.7965	35.4728	34.1685	34.3969	33.0918	36.2463	43.3923	42.137	40.6607	41.051	45.5936	42.3672	41.8385	40.9253	37.3501	35.8466	39.4754	38.7069	58.9937	50.2991	51.3586	36.9819
HIT 1673	32.4459	36.998	32.9944	33.8785	36.4367	36.8426	32.9037	34.2887	33.0813	33.4514	40.1183	34.2382	33.3791	33.1993	34.0124	35.1805	41.7524	41.0337	38.3141	39.0274	39.1588	39.049	38.8607	37.8676	37.4486	36.3879	37.2905	37.1002	59.1056	41.9644	46.5852	35.0436
HIT 1674	32.3743	37.2279	33.2983	33.7094	37.8256	37.3711	33.5499	32.6524	33.0506	33.7622	33.6419	32.9632	32.6457	33.6981	32.0688	36.996	47.2951	44.7732	41.4448	39.6443	38.4281	41.5141	40.5103	41.6838	36.8086	36.3762	39.6217	38.1836	72.6609	42.2831	51.2026	37.2379
HIT 1675	37.472	50.3125	55.7372	43.539	46.9491	46.8234	40.046	38.9431	41.1508	44.3423	43.6109	42.4551	38.0869	42.152	36.2242	43.7846	60.6377	62.1342	52.0535	50.9498	102.876	103.754	75.3773	50.9865	41.9575	39.0682	41.4671	51.189	72.5252	49.4728	51.5405	43.5849
HIT 1676	32.354	36.0773	33.4196	33.1868	37.8854	37.4382	34.062	32.4892	32.9931	33.5527	34.2085	33.2188	32.8282	33.4817	33.0391	35.3203	42.9274	41.5615	40.4079	42.1466	41.2997	39.7602	42.6767	41.1051	37.099	36.9986	39.5778	36.3367	60.8197	46.5883	50.7109	36.944
HIT 1677	32.3061	37.6321	32.3737	34.1929	36.6602	38.1139	36.3829	32.7995	33.3655	34.1216	33.3299	34.5222	33.3164	33.8287	33.5646	36.7687	43.777	38.3868	40.1891	39.7241	39.4253	39.95	40.3128	39.4282	36.586	37.8664	38.4976	36.2004	57.0435	41.0689	46.1375	36.0521
HIT 1678	33.0351	39.7119	35.284	35.5275	38.661	38.6935	34.829	34.2417	34.573	37.5705	34.0721	37.155	35.8676	34.5923	34.6922	40.7661	52.2942	45.4224	43.8498	45.8989	50.3326	53.7998	50.574	44.6106	47.9285	39.0711	42.0238	38.554	66.5576	44.9625	51.404	38.4563
HIT 1679	32.7814	37.1132	33.3531	34.0844	39.1157	36.1896	34.103	33.077	33.2902	34.0703	34.7082	33.8998	34.2243	34.3713	33.5611	35.4933	52.9911	55.6049	43.8048	42.4287	51.3758	50.024	52.5922	43.1685	40.9817	40.9058	54.4476	37.8918	67.2628	45.3292	56.4114	42.5966
HIT 1680	38.4686	54.4747	87.3623	42.9266	448.947	38.9401	34.0152	43.4432	34.5523	39.2352	37.6888	67.7318	33.4922	36.4856	32.536	46.2236	73.2205	52.3943	55.5893	44.3713	72.8896	72.9168	57.3672	45.2625	54.6599	46.4737	42.8177	44.9046	131.591	59.4811	57.6119	43.4798
HIT 1681	41.4307	46.3019	36.3614	36.7206	38.7485	40.72	34.7801	35.6532	36.4303	42.3672	39.8016	38.3592	35.8064	40.7285	35.8942	38.6334	54.9465	54.7121	49.308	44.754	61.1143	89.4446	52.7235	45.7383	39.0752	37.5631	40.4198	35.0363	77.5791	47.249	53.7174	41.3351
HIT 1682	32.2444	37.3164	32.8588	34.1974	35.6531	38.4069	33.3991	32.9259	33.5472	33.5516	33.7435	33.4755	34.3723	34.2443	33.0252	35.3207	46.496	42.3711	41.2582	44.6637	40.1644	44.7727	44.0633	39.4572	40.7602	38.1697	40.0208	35.7451	58.2309	39.4857	52.5857	37.8148
HIT 1683	32.7835	36.6125	32.9624	34.4552	37.8475	35.3238	34.2024	32.4079	33.4094	34.878	37.1336	33.748	33.1461	34.5659	32.5181	38.2324	41.9278	41.105	40.3383	39.6572	39.9875	39.814	40.8804	38.6954	36.4064	38.9684	41.0818	36.9274	60.8725	42.3177	48.1863	35.9417
HIT 1684	32.6703	39.2286	34.0701	35.0893	39.8073	38.1154	36.3189	33.7664	700.111	48.1257	35.3228	35.813	33.0786	33.7336	35.3933	39.4691	402.197	540.789	949.04	130.918	266.857	370.149	443.891	400.853	143.618	355.838	795.977	286.141	405.592	169.247	278.093	757.641
HIT 1685	35.981	37.8944	312.038	33.9125	39.3842	37.3225	33.7183	32.34	33.0922	33.8685	33.8847	33.3508	33.4958	32.617	32.7427	35.2303	45.7954	38.413	40.3966	39.8441	39.1006	42.7435	43.477	42.1942	36.6413	35.7969	38.1134	35.6283	58.1506	40.4881	53.5642	36.5657
HIT 1686	76.84	401.25	840.902	62.3632	110.452	62.9663	45.5762	568.514	108.572	573.967	159.69	3434.11	995.311	66.4888	512.112	5933.29	187.064	268.701	186.112	235.236	140.621	116.482	302.623	89.0252	455.991	150.111	116.9	94.5546	192.439	87.3147	147.957	100.933
HIT 1687	31.9335	36.9274	32.7421	33.4403	36.2048	37.5231	32.9102	32.9737	32.0854	33.4729	34.0421	33.9008	33.4116	33.1844	33.3862	35.355	65.5216	2161.48	64.0223	40.6673	41.7183	40.9514	42.3803	39.4552	210.151	38.2765	37.7781	37.5859	61.7315	42.5593	41.0989	40.8424
HIT 1688	32.1698	36.3239	32.8626	33.2213	36.7385	36.8334	33.6527	32.2486	32.6471	33.375	33.0468	32.1559	33.2907	33.7882	32.457	36.4161	50.6186	1012.3	43.9092	39.5876	41.86	40.5668	39.1175	38.1377	122.536	37.1631	37.9953	36.2975	66.5814	41.7374	53.929	39.1733
HIT 1689	32.5309	36.6945	33.149	33.6277	36.6844	37.8124	33.8215	32.7321	33.8306	33.3171	34.2894	33.5729	33.5359	33.6587	33.2959	35.0719	238.276	35016.5	95.5569	40.1296	391.785	242.045	41.8948	38.8698	3368.62	36.0217	39.8302	36.3878	74.2489	40.4349	49.5753	133.291
HIT 169	33.5694	42.3137	321.977	589.736	42.7868	42.469	45.0901	37.7667	84642.8	8115.88	6981.9	58.2982	38.4574	55.5527	7220.34	40.4581	2241.42	177.481	774.823	57.0907	1033.02	99.1967	371.159	57.9712	1041.48	41.2452	2300.69	46.2609	92385.9	85.8201	334.228	1035.38
HIT 1690	32.2297	36.214	33.0487	33.0657	38.3616	36.8686	32.9901	31.6051	33.6649	33.3883	34.4088	32.2325	32.1695	33.2626	33.2117	35.1375	421.438	354.111	129.268	48.0754	1423.41	904.968	198.281	43.1946	227.407	39.0576	301.2	104.763	125.862	42.8085	54.7805	328.826
HIT 1691	33.9413	57.123	33.4716	34.0709	41.3986	52.0704	33.7409	34.1296	37.055	36.7654	34.6205	37.0961	37.0975	33.5796	33.1401	38.5021	64.3715	100.636	55.9908	49.9852	84.5574	84.6399	71.3604	49.982	64.2953	48.0104	68.155	61.5028	77.4817	43.8986	54.3982	53.6275
HIT 1692	68.0074	55.9263	78.7485	40.0802	42.9565	37.8167	58.9018	56.5405	37.2583	64.0736	42.189	137.301	4985.58	40.9997	52.7201	154.781	12518.6	17334.5	5134.08	1175.52	36507.7	22526.3	8707.57	205.746	13549.2	374.092	14465.2	3258.82	4760.77	255.06	531.83	7165.2
HIT 1693	32.6257	35.9704	34.3729	33.8547	37.473	36.1973	34.3887	32.8841	33.4188	34.8774	35.2039	34.5619	34.0487	34.4402	32.799	36.482	48.0713	48.8472	45.646	48.1504	46.1956	46.41	47.3569	46.9966	38.8903	36.4445	40.5674	38.6494	60.473	44.1067	50.7854	39.461
HIT 1694	32.1424	36.7938	32.3761	32.9838	36.9471	36.8257	32.2236	34.1428	33.9554	32.9455	37.2983	33.4669	33.043	33.5181	33.3385	35.1704	42.4376	45.4795	39.7929	40.3725	38.3564	41.3387	39.6432	40.1458	38.5188	37.3171	37.3086	36.3404	57.6411	40.7323	48.0414	36.8589
HIT 1695	31.9349	37.2722	34.5993	34.3548	37.2718	36.8945	34.9487	33.8243	33.7605	36.2038	34.1563	34.0093	33.838	33.8996	33.8308	36.5973	47.1914	41.4895	44.2315	44.9491	43.372	43.123	45.1321	43.9651	37.0769	36.2319	38.6687	35.4847	64.4426	42.3502	53.4013	36.683
HIT 1699	32.0874	39.6593	33.2342	33.3397	36.7728	36.6363	32.8828	36.2113	32.3827	33.8933	33.4807	33.0099	33.2953	33.9076	34.7308	33.9015	43.2126	39.8836	39.3788	41.7089	174.814	92.4072	41.2473	39.9857	38.2789	37.6823	43.0039	40.3692	77.2971	48.0425	58.8994	345.208
HIT 17	32.1146	36.5548	33.0897	33.3975	37.623	38.7703	33.2957	32.7484	33.126	33.5998	33.7528	32.8467	33.2807	33.6318	32.836	35.0892	44.5206	522.698	59.2893	369.26	934.962	119.482	58.3012	38.8348	42.1629	36.5243	39.2789	36.4723	369.282	41.9116	440.715	35.6697
HIT 170	32.1694	36.1296	33.3828	33.5424	36.8556	36.7201	33.1743	32.5148	277.715	37.2062	35.9071	33.1126	33.2158	33.2495	40.3637	36.1671	46.4183	40.4435	40.5451	39.9212	42.0659	42.2655	43.5944	40.488	38.7696	37.2505	40.9471	36.752	137.6	45.4454	56.7506	36.7122
HIT 1700	32.0348	36.4662	32.6378	32.4801	36.981	37.6319	33.2026	32.7397	32.2326	33.522	33.7409	33.4697	73.4428	33.541	32.5462	34.1893	47.03	55.7912	37.3325	48.2292	523.922	223.357	57.3492	37.8793	95.6894	42.1867	45.9936	45.8649	64.1454	42.4683	76.7874	804.806
HIT 1701	32.234	36.8004	33.7304	33.8069	39.7938	39.6929	33.2662	33.4307	34.6034	34.368	33.8235	33.9943	80.7812	34.0901	33.8036	36.6154	1856.1	32941.4	158.901	96.4461	6488.15	2584.13	1099.5	73.5523	336.07	1911	9938.16	249.829	292.166	51.316	155.064	6085.94
HIT 1705	33.1765	38.8134	34.5041	34.6739	43.7685	38.0054	36.5777	37.0067	10719.2	56.2097	36.6265	37.3529	36.2013	37.0707	35.0589	51.0036	17284	7535.76	4715.58	1300.91	360.388	8198.36	6274.56	4834.77	1974.91	1807.38	469.278	7992.73	968.635	1727.38	1104.78	9615.73
HIT 1706	32.23	36.8164	33.0522	32.7502	35.5994	38.5007	34.2463	33.114	32.2224	34.466	34.4719	33.4817	33.8282	34.4365	32.9368	34.6642	60.1893	39.4847	53.0095	40.6117	42.5181	107.27	40.6787	40.978	55.7452	37.3676	40.8558	178.031	56.5261	43.9493	53.0288	59.2276
HIT 1707	32.8287	39.7632	33.8697	33.8406	37.9144	39.5091	33.7512	32.6652	32.9132	33.5429	35.0228	34.1365	32.9284	33.8395	33.1244	35.17	52.3401	49.6714	49.1621	44.3956	43.4536	51.35	48.0329	45.0006	40.168	37.2359	40.1435	56.7944	61.9901	42.2638	50.087	39.8631
HIT 1708	35.0871	52.5835	52.9163	37.3626	69.9904	42.1562	37.1348	33.6645	34.1531	35.0182	34.201	34.5782	241.182	33.7688	33.8622	39.5757	1363.69	875.058	1065.5	1198.1	465.805	1944.65	515.003	359.779	1126.63	282.936	252.61	2677.02	116.353	111.42	1069.8	1732.3
HIT 1709	32.3338	37.9671	33.1135	33.5114	36.8267	36.3811	32.9135	33.0345	33.0843	34.0427	33.9772	34.0547	32.971	33.5837	33.2973	35.6641	69.1798	43.1598	61.1708	40.2229	39.4778	113.948	44.7335	41.5071	45.6901	59.28	38.7467	95.6276	62.757	44.3717	51.1275	43.9749
HIT 171	32.1776	37.229	37.729	34.3003	38.0275	38.1056	33.5779	33.0557	3409.26	73.4073	55.8043	33.8881	33.8575	33.691	115.916	35.3782	46.8331	40.9033	42.1948	40.5857	41.8152	41.5402	42.3609	39.1958	45.8671	38.3983	58.6149	36.5834	657.551	43.2704	63.6986	57.9663
HIT 1710	34.2979	60.6973	51.3449	37.0948	88.9344	39.5617	35.4936	33.2631	33.1952	34.1988	34.0461	33.8983	89.17	34.1985	33.3238	38.6268	9225.84	5233.96	4267.71	5835.56	631.173	4468.33	808.09	2302.5	2824.64	2539.6	3456.66	1707.02	144.045	2317.18	2094.89	624.46
HIT 1711	32.6754	35.1028	33.7592	33.304	35.1211	36.9203	34.311	32.6985	33.9616	33.2853	33.3834	33.5184	34.6289	32.7589	32.8556	34.9881	2077.26	575.68	53.2568	56.8772	82.9263	134.969	89.2993	87.0783	961.26	47.0694	59.5939	89.0761	72.4798	743.309	652.642	252.816
HIT 1712	32.2713	36.6977	33.1329	34.9385	36.9284	37.9198	34.499	33.0828	33.5122	33.3129	34.268	33.7152	33.6561	33.7025	33.363	35.8356	169.842	40.478	40.4748	40.451	39.8268	41.9659	40.8083	42.6856	153.713	37.3333	39.1686	38.4799	59.8657	186.657	174.881	37.6805
HIT 1713	32.0153	37.0901	33.1487	33.5712	36.7326	36.9925	34.195	32.7873	33.5969	33.5686	34.1418	32.8408	33.3572	33.812	33.6384	35.3116	625.54	45.3886	43.7151	40.4005	50.4645	41.1534	40.7574	40.3273	178.965	37.3972	46.0278	41.0823	57.0078	170.303	167.195	37.451
HIT 1717	32.591	37.8205	33.4316	34.2517	37.6147	36.8756	33.4916	32.3677	32.4899	34.273	33.7388	33.4847	34.5221	34.4379	32.5894	37.2687	9860.82	9375.97	6127.54	1144.6	62.1621	2531.23	5915.9	5255.69	1686.15	4399.2	3951.42	5266.78	1684.07	3937.05	13006.1	40543.6
HIT 1718	33.2037	38.7661	34.1562	35.4304	43.7818	37.91	34.1148	33.46	34.0927	33.6454	34.3433	33.4156	34.1863	34.0422	34.4488	39.7259	43023.6	36918	27996.8	5892.88	175.391	10539.8	26160.1	20764.9	4616.27	17490.8	16968.6	15356	9182.07	20906.4	65223	75747.4
HIT 1719	32.329	35.865	33.1242	33.7035	37.5183	37.329	33.0636	33.0357	33.0885	33.5709	33.7359	32.9179	32.8482	33.1062	33.3774	36.138	5107.31	2798.38	810.026	196.128	42.986	402.699	847.418	596.611	2131.72	701.552	2649.5	1800.6	1943.96	658.122	4611.71	4515.56
HIT 172	32.1032	43.2303	33.6245	34.2605	38.9286	37.2204	34.2482	32.2217	32.8738	35.3555	34.6022	33.7761	33.5566	34.3818	34.223	36.067	48.8172	45.989	54.6417	62.1687	292.083	48.6522	44.9188	45.01	39.994	39.6691	39.6864	42.1677	1178.05	44.7652	77.9997	38.8807
HIT 1725	32.5698	37.3592	32.9806	34.3649	36.8956	37.5733	32.8504	32.9577	46.9807	33.6526	33.3841	33.5452	34.0875	33.487	33.0166	35.2726	435.72	48.007	40.6733	41.0798	99.9592	1841.2	52.9253	41.2815	221.906	37.269	39.8492	35.3989	4083.45	45.6834	107.495	36.8231
HIT 1726	32.28	36.4873	33.2544	33.6238	38.1904	37.7715	33.7049	33.2005	33.22	34.0331	33.7541	33.4166	33.6064	33.7081	32.7145	35.4408	190.143	115.013	48.1561	45.8257	49.6212	641.973	51.8515	54.684	48.9433	38.0784	40.818	51.3229	2225.13	46.1555	74.9263	61.406
HIT 1727	32.2078	36.7387	33.0122	33.6639	36.9736	36.732	33.7182	32.5017	33.0061	33.4914	33.2003	33.6226	33.3171	33.1398	33.3817	35.4995	45.4678	40.2932	38.6165	41.1953	39.8673	41.8546	41.112	41.1293	36.5674	36.8559	38.9053	37.0261	62.3448	40.7332	51.4164	35.4672
HIT 1729	32.4032	37.2164	33.0103	33.5572	38.4018	37.5776	33.7185	33.1886	33.2197	34.2859	34.1637	33.6071	33.371	33.6098	33.6869	37.4171	20913.8	28760.9	7360.98	1591.46	78.5461	748.374	4307.29	7797.95	3184.64	10083.8	5485.14	18133.1	1287	6747.44	26309.3	51043
HIT 173	32.0786	37.1505	33.3765	33.5207	37.1831	36.4123	34.1887	32.2511	33.3532	34.4594	34.1713	33.3346	33.5057	33.5213	32.5125	35.9891	42.7583	39.413	38.5143	39.981	267.791	41.4828	38.675	38.4678	38.3811	37.6774	38.252	41.1979	1860.75	42.6026	47.1448	35.5852
HIT 1730	32.2124	36.0517	33.1159	33.8325	38.4568	36.949	33.9944	33.6294	33.4213	34.7282	33.7731	33.6384	33.8354	33.9915	33.4318	36.9625	10570.6	12221.8	3080.5	687.996	62.7473	509.483	1884.68	3174.39	1360.79	3678.16	2236.74	6227.64	610.065	2626.11	11344.5	24053.2
HIT 1731	32.204	37.3595	32.8851	33.4159	37.8423	36.6813	33.4951	32.7319	33.0552	33.5672	34.2695	33.4107	33.263	33.5794	32.9252	38.7642	22725	31022	9698.36	1907.5	152.506	3764.17	9237.03	15862.7	5076.91	14524.2	8046.54	9928.84	1470.26	5482.93	32693.4	45611.6
HIT 1732	34.1636	41.3388	33.5506	33.8019	38.3886	39.1126	34.367	33.1916	34.0469	34.6218	33.8335	33.6335	75.8263	32.9338	33.4939	40.7976	36469.5	3797.33	17329.7	1645.5	215.154	4466.27	4165.96	5249.83	3829.45	3333.5	2101.89	3343.18	142.78	5646.27	45703.7	18689.7
HIT 1733	32.162	36.3042	32.6504	32.9053	38.1089	36.281	33.2238	32.6863	33.3316	33.4788	34.1519	33.0771	32.8151	33.1835	33.4339	35.8997	493.164	96.8413	305.334	63.7291	43.7625	110.309	101.878	115.946	116.597	103.22	72.7387	92.8425	64.0571	127.452	814.29	546.639
HIT 1734	45.5615	109.131	60.5298	39.9778	1972.48	3312.05	50.4729	49.7609	36.2994	47.1218	36.0807	68.038	293.789	34.2292	34.8881	41.6699	12660.8	4138.8	7286.67	1414.96	239.679	3316.55	6280.67	3618.63	3008.61	4030.02	3330.47	4780.03	2888.03	2245.08	16044.8	13475.2
HIT 1735	32.702	40.8696	33.5708	35.6256	39.2473	38.1753	38.4661	34.5129	39.4503	36.7619	35.0745	34.903	34.6109	35.5479	34.5449	39.4941	15344.5	47386	2923.57	3388.49	401.41	921.053	119.253	156.894	18146.9	6851.74	189.937	5196.34	103.229	91.7358	13916.2	332.675
HIT 1736	32.0124	37.2157	32.7012	33.4758	37.1242	36.5902	33.0646	32.7386	32.8319	33.5508	33.2753	33.2894	33.19	33.3094	33.4467	35.3521	173.812	43.2474	55.1313	60.532	45.2467	46.1883	53.8218	48.3767	143.299	188.654	40.1017	169.993	61.8812	46.4804	380.193	59.6866
HIT 1737	32.2089	37.1893	33.4658	33.6816	37.685	37.0512	33.2273	32.6216	34.0246	33.5181	34.0314	33.2435	34.1586	33.3549	33.5436	35.312	2474.25	92.8692	135.48	268.654	195.232	884.595	63.8103	43.0336	1245.38	5024	55.0234	1389.81	72.6165	48.7792	13434	37.9249
HIT 174	42.7556	39.468	35.4205	34.3744	38.3324	37.7853	34.411	33.1727	33.487	34.2438	35.0015	33.5144	33.6187	33.6747	33.7316	35.6381	133.318	44.7561	97.4908	225.391	1742.55	49.8912	42.5829	42.8699	45.5243	42.4892	40.0766	59.2623	12189.6	238.321	242.586	38.2678
HIT 1741	32.2662	38.219	33.0852	33.4939	37.3448	36.6077	32.5736	33.0361	33.9407	33.5583	35.3031	33.2868	33.3409	36.02	32.7255	36.0945	67.3241	80.5497	45.5476	46.4576	44.781	45.312	42.6729	41.9225	41.0986	554.247	43.8189	40.8286	67.0568	42.876	62.4073	41.6765
HIT 1742	32.8818	38.6927	33.744	33.4287	37.4572	37.0912	33.5047	32.1224	33.9267	33.9034	33.6741	33.2314	33.4686	33.5644	33.7126	36.0942	48.8206	45.0269	42.3366	42.0436	42.0485	44.6452	45.1426	41.6045	36.7191	256.577	42.2249	35.7617	64.1837	43.5	52.6853	36.7309
HIT 1743	32.4256	37.2259	32.651	34.6939	36.1459	38.7117	33.116	32.9261	33.6937	33.8839	33.6203	33.951	33.2496	33.5428	33.4287	34.1667	44.7674	41.6504	43.1246	42.8715	39.6372	41.2736	40.142	40.7778	36.9387	127.677	43.0575	35.8334	60.5347	42.9149	50.2452	36.9398
HIT 175	33.3968	43.1365	90.0723	1561.76	42.7316	45.5468	41.5867	37.0329	28600.8	28614.9	12043.6	65.3104	37.7471	62.5262	1269.52	38.853	34154.2	1003.14	1960.82	101.216	16715.2	658.909	349.188	100.612	470.132	51.9184	504.997	40.5112	91314.4	96.5935	147.819	188.701
HIT 1750	32.2674	37.4324	33.0258	33.8536	37.7827	37.2992	33.6182	32.9129	33.0714	33.9033	33.8211	33.1976	33.4368	33.6781	33.1595	35.8828	1342.7	128.049	382.498	1813.71	13721.8	15686.4	895.459	463.807	279.403	1389.3	1140.86	72.6126	8898	620.906	710.275	327.533
HIT 1752	32.3054	39.3014	33.4266	34.5093	37.8311	36.9171	34.1934	33.2074	33.24	34.916	35.3108	35.2067	33.535	34.2676	33.2173	36.7034	330.828	52.4646	199.889	352.796	3638.79	12730.1	795.152	476.15	63.2389	989.883	1033.36	40.1147	12501.3	552.649	430.744	201.396
HIT 1753	32.9514	38.8335	34.6101	35.3766	40.0381	38.0185	38.1389	33.9221	41.6231	36.9273	35.1294	35.3684	35.1917	35.5048	34.4044	40.385	18016.4	66603.6	3874.09	4729.38	454.047	1672.97	129.291	167.996	24337.1	9377.75	207.544	5861.37	122.285	100.428	13241.5	326.721
HIT 1754	33.4056	39.3137	33.527	33.1068	38.2202	36.0555	33.7452	33.6082	33.6818	33.6762	34.2252	35.3892	33.6968	33.9688	33.2234	36.3713	495.318	2938.11	150.872	151.658	57.0818	115.825	42.1218	42.6028	686.354	413.27	47.8042	294.473	74.7186	44.8087	292.917	44.0763
HIT 1755	32.2759	37.1204	32.7924	33.6403	36.548	37.1081	33.1345	33.4941	32.9987	33.6479	34.3478	33.6767	33.9359	33.5275	32.9744	36.9446	3214.45	24524.1	719.649	915.083	294.426	1279.32	47.8238	43.7304	4776.64	3810.07	53.9093	1583.98	98.4274	42.9995	3131.76	40.197
HIT 1756	32.4904	37.3666	33.188	33.3646	38.0347	38.0468	33.3935	32.7345	33.6499	34.0115	34.1786	33.8064	33.7179	33.4731	33.3833	37.0104	5359.3	21021.7	2006.61	1542.75	479.505	2063.03	205.916	62.9382	6228.96	10672.5	175.005	1519.77	405.374	62.6938	9885.43	70.671
HIT 1757	31.9364	35.6622	32.5635	33.1503	37.8974	36.2871	33.644	32.6884	32.7439	33.4297	33.1748	33.0868	33.0201	33.0812	32.6816	34.7335	51.0264	66.9531	40.1958	41.4866	39.952	44.2721	39.4908	38.9213	43.3695	52.6412	40.1934	37.7831	65.0557	47.0607	62.0567	35.163
HIT 1758	70.9354	135.268	209.133	48.7037	195.408	42.8559	80.28	78.038	36.2256	57.1133	41.0259	125.354	38871.1	39.8622	53.8283	147.43	13435	23289.2	9131.78	21491.5	10405.1	3684.45	27403.5	3855.15	49437.9	13260.7	1757.54	6223.34	1665.05	1130.7	14561.2	3907.99
HIT 176	32.4743	40.2115	34.2527	55.1588	38.4239	36.5424	33.9902	33.5172	49.3114	1745.75	244.511	36.1565	33.7016	35.2627	35.0512	35.9111	404.039	53.5681	65.4786	42.9885	211.955	54.544	46.8551	42.0138	41.1136	37.457	41.1982	37.3989	856.91	44.66	54.3116	37.5762
HIT 1762	83.2583	52.7883	38.9065	60.1206	44.7174	45.1791	47.7011	42.5738	635.557	79.1945	66.8788	47.0737	42.4988	54.2249	41.7908	53.8257	19120.1	13717.2	7676.2	3480.41	2132.23	6767.39	15054.3	10793.8	7460.59	12539.3	12698.6	13610.3	12822.4	2240.57	2799.71	8435.69
HIT 1763	31.6679	37.7779	32.7628	34.0731	35.4903	37.8488	33.1867	32.567	33.1084	34.917	34.2834	34.2879	33.1445	33.7861	34.1836	35.2899	46.6006	44.5525	40.9235	39.3802	39.8022	40.7091	40.4539	39.1659	36.6657	38.4293	38.1764	36.5323	57.7618	42.3169	51.5321	36.4679
HIT 1764	41.3992	60.3446	47.832	38.9182	432.429	746.909	40.5004	35.8694	36.7163	38.8771	35.5484	39.8982	100.942	33.8179	35.2788	40.675	15466	6377.44	7733.53	2123.44	208.279	3231.84	8417.9	5267.03	3251.13	5952.3	3644.63	4748.66	4623	2876.28	22212.4	11956
HIT 1765	33.2829	38.5172	33.6881	36.2025	37.4686	37.5736	39.0885	34.2867	41.1525	36.0274	35.3239	35.4689	36.3509	34.9162	34.2307	37.0258	544.907	2505.18	460.859	512.549	57.7716	1352.4	260.148	498.72	103.237	462.251	144.245	579.381	88.2599	640.897	188.165	234.222
HIT 1766	32.4008	35.6498	33.3244	34.365	36.0334	38.0436	33.5414	32.6933	34.0382	35.502	33.7974	32.8982	33.4405	34.0297	32.9194	36.0563	292.791	212.825	150.194	50.8027	69.6417	216.846	120.029	64.0396	46.5298	47.0542	47.1087	44.3336	54.3226	57.2205	58.168	39.1092
HIT 1767	32.6097	41.692	34.0465	35.1052	39.9939	39.1973	33.5023	32.8853	33.0866	35.0288	36.4119	33.5357	33.4214	35.2891	34.1213	38.2324	578.895	663.739	234.206	49.4895	42.0675	352.862	192.675	69.6257	41.8355	41.9723	41.9869	38.4164	56.5441	44.8416	69.47	39.1242
HIT 1768	31.7512	35.8084	33.1896	33.7995	38.9348	37.6755	33.1095	32.7444	32.839	33.6183	33.1409	33.038	150.396	32.8305	32.7429	34.0097	670.61	1778.55	3371.91	3904.45	161.323	1981.44	2542.83	1292.98	720.325	576.185	545.563	3281.45	420.994	438.873	588.532	6454.54
HIT 1769	32.4911	36.588	32.7041	35.4379	36.6991	36.2447	34.7229	32.5883	33.4133	33.9646	33.7459	33.6852	33.8465	34.6334	33.2023	34.6014	55.954	95.5889	48.7277	71.9426	44.5128	126.412	97.2603	94.4848	72.2716	50.269	40.0981	120.369	62.5729	56.8548	52.4196	390.51
HIT 177	32.5161	37.6534	33.3086	53.1589	37.123	37.5443	34.2277	32.8325	80.3864	1312.85	219.007	36.1025	33.3514	35.0873	37.5126	36.1507	76.2044	45.6254	61.1661	43.3893	58.8445	48.8715	49.2864	41.9299	38.7141	40.3367	41.3883	38.236	134.648	44.3099	55.3503	39.5514
HIT 1770	31.8069	36.4334	32.7326	32.9923	38.2146	37.9954	32.8901	32.7925	32.8546	33.5996	34.3884	33.3524	32.7709	33.6144	32.5638	34.6383	81.7333	48.2076	47.7274	44.7877	245.477	56.9766	457.081	45.7554	39.9916	39.1027	40.8128	42.157	77.3881	50.7668	59.0569	61.5671
HIT 1771	33.3111	38.8018	35.6294	92.0906	50.3491	37.0596	53.6375	42.0923	124984	181.56	61.9887	44.3732	38.9817	41.0237	38.2533	62.0225	117248	70282.9	72374.6	3516.71	5705.21	91391.1	50448	27242.1	8746.02	38209	3764.85	63128.8	20206	106034	3220.78	117103
HIT 1772	31.7119	36.2846	33.4977	33.5563	36.2914	38.2699	34.6893	33.2921	37.8013	33.6813	32.894	33.2482	32.9224	33.8791	32.8934	34.8824	49.0981	40.5507	41.5187	41.0377	40.1776	46.7169	39.4382	40.0787	36.9407	36.9586	39.1894	37.9161	58.8081	41.879	53.5005	46.8487
HIT 1773	32.1859	36.8484	32.9589	33.1842	38.0526	36.8784	33.9754	32.8265	35.8796	33.0431	33.6186	33.0109	33.1453	33.7219	32.7514	35.3373	46.0287	40.7437	40.8613	40.8089	39.3539	40.0966	41.9224	41.028	36.3621	36.5652	39.9569	36.9929	49.8926	38.9377	43.9869	36.5662
HIT 1777	46.1623	62.741	141.052	68.4849	51.8857	36.6945	38.022	35.2715	34.0006	37.2553	40.8229	34.2497	34.189	36.5812	34.8006	35.1234	52.7886	46.616	45.2581	49.9254	45.4253	50.3753	42.7183	40.1197	38.4192	38.2809	41.2121	40.7417	1444.13	45.5312	52.7196	37.2786
HIT 1778	32.1141	36.0906	33.4044	33.2372	37.8738	40.8532	33.7735	32.7341	33.0822	34.8695	33.89	33.5383	33.1808	33.365	32.7397	35.3852	43.2262	41.1061	40.1714	40.2236	42.3665	41.5924	41.1011	39.3752	37.8199	37.1997	38.7631	35.937	60.3246	42.3168	49.6932	36.0009
HIT 1779	32.3754	49.6316	34.7262	35.1112	42.2685	39.0306	39.3018	34.5371	36.6766	39.3532	36.5752	38.2914	36.3433	35.643	35.5763	39.1583	53.4615	54.2928	49.0324	46.0999	45.7287	48.689	48.2528	47.533	41.0853	39.9147	41.0669	40.5693	79.617	54.6039	57.6299	42.4146
HIT 178	107.969	135.894	471.601	53.1293	174.071	210.529	46.4427	195.707	49135.6	476.746	742.948	853.078	192.999	51.4422	4469.36	301.196	125.317	63.9021	111.132	46.4231	119.803	75.7012	157.198	44.8757	322.317	50.2644	647.919	41.5088	30849.7	72.4929	69.2102	429.016
HIT 1783	785.011	1076.8	4021.93	721.922	576.505	57.2017	4029.9	74.0474	2666.94	253.172	176.307	799.448	435.452	382.825	318.19	106.274	565.423	209.76	532.903	722.369	366.827	123.313	207.182	119.223	259.507	104.654	99.724	489.294	55059.4	253.308	112.669	215.318
HIT 1784	32.4271	36.2983	33.0203	35.7831	38.6754	35.6663	46.7921	33.1865	33.3193	35.8468	34.2733	33.9855	36.2223	35.1664	35.8033	34.5917	41.1001	39.2769	39.8088	40.8742	38.3458	43.1349	37.3405	37.2619	36.8162	35.8841	38.6568	36.7599	57.3144	42.6606	52.9034	35.8898
HIT 1785	93.8084	42.2545	52.5135	44.2002	80.7859	39.0734	109.415	32.7214	48.0591	39.6384	36.2834	61.3783	45.5846	36.5901	40.0821	62.0746	39.8496	36.0329	44.485	40.0013	41.0622	40.1963	52.7229	37.7497	37.2303	36.6771	36.0196	54.9285	71.6129	42.3867	45.6857	35.2053
HIT 1789	115.667	202.247	673.713	159.057	141.04	42.327	53.0835	36.5199	40.5873	46.8021	61.4935	37.8764	36.5772	46.0406	36.1531	39.0374	138.816	56.0856	102.576	142.725	106.8	57.4834	57.9016	48.285	42.8105	44.9969	44.4789	54.6242	9565.4	75.6127	57.6357	40.119
HIT 179	32.0218	36.7845	40.1236	35.1763	39.6929	42.7104	34.5084	33.118	4410.46	50.9923	59.6168	32.7515	33.1903	33.3328	224.378	36.0708	418.934	55.38	57.8979	45.9655	184.787	78.3371	52.7474	47.5675	49.9493	39.4233	72.9759	35.4501	2106.13	44.3842	56.8247	59.2349
HIT 1790	152.834	54.0592	135.763	80.6906	93.9598	40.3228	43.0069	36.4789	42.9917	39.5198	38.1846	36.9698	308.984	37.0568	35.5162	45.8284	292.883	286.363	312.04	1054.87	166.834	123.216	449.351	233.072	849.636	111.354	69.3727	212.043	1028.72	86.2219	379.917	102.05
HIT 1791	77.6178	105.358	363.398	117.368	113.258	44.2261	70.376	43.8826	60.4764	53.9047	54.1526	46.3251	56.837	48.393	42.674	50.1877	153.276	132.367	117.8	700.669	141.49	189.777	86.2499	121.537	376.348	74.163	92.8273	134.067	3287.06	85.0479	376.738	108.602
HIT 1795	32.4594	36.9448	33.2816	33.9343	38.3662	36.9621	33.6852	32.8135	33.2075	33.968	33.3671	33.4016	33.5878	33.846	33.0728	35.7849	42.0521	40.2525	42.6824	40.6069	42.9455	41.3672	39.9144	41.2323	38.3488	38.4161	1534.02	39.9895	62.2267	42.8199	222.494	245.264
HIT 1796	32.0902	37.8854	32.8718	32.8754	35.2451	36.016	33.5347	32.2399	32.578	32.2747	33.2665	32.4104	33.358	33.7218	33.2189	34.7347	39.4057	36.5563	39.0201	43.481	40.2536	40.0803	58.7545	38.0137	38.0889	56.4289	1002.94	38.8748	397.768	42.9142	213.225	229.395
HIT 1797	32.2576	37.4071	33.1265	33.6835	37.695	39.5563	33.6186	34.309	32.993	33.447	33.3173	34.0765	33.488	34.067	33.6044	35.1985	43.4925	41.92	40.3648	40.2055	41.5245	43.7955	46.4528	39.7812	36.2564	42.3125	2328.85	40.6693	666.283	42.1492	256.259	249.051
HIT 18	58.4427	36.703	33.1648	39.4893	10576.2	54.999	33.4241	563.793	33.1183	33.7391	33.8065	33.8836	34.8365	33.4979	33.0256	44.2707	59.2729	3274.44	184.07	2223.22	6353.35	551.675	167.502	48.668	91.2434	49.5903	173.347	44.6848	3198.76	119.731	3729.61	75.3637
HIT 180	32.2711	39.1741	89.0727	33.7602	36.5517	36.829	33.6153	33.2387	22912.2	67.4813	217.716	33.9449	32.8668	33.3857	1272.52	35.7876	45.4381	34.4493	56.9898	38.805	38.7931	41.3189	58.9822	37.6873	124.515	36.4598	274.031	35.0955	11297.2	45.9241	141.745	182.841
HIT 1807	326.554	525.299	1930.74	367.16	261.8	51.4586	54.5448	35.8437	37.5073	37.0612	55.8568	36.0967	34.8116	51.0455	35.9448	36.9879	116.688	46.468	45.2981	66.9284	105.984	51.8656	46.1711	44.6119	37.9887	37.6476	40.7975	41.5938	657.551	53.0309	57.4591	42.6322
HIT 1808	124.367	172.891	561.964	102.94	95.2346	42.2097	42.2609	34.3789	36.997	37.9719	49.1521	36.2929	34.9107	42.0494	35.2655	37.6351	75.3869	48.0489	45.2224	45.3188	64.4138	48.5579	46.0338	47.1467	39.817	38.726	40.8553	39.3577	78.9749	48.3081	51.2636	39.6912
HIT 1809	1054.84	1272.57	6508.24	1184.84	655.8	71.743	108.849	44.041	42.8087	50.6214	109.969	39.4219	37.7766	96.4665	42.191	43.9888	268.88	62.3093	57.2631	57.5291	237.857	72.2409	54.5395	55.4914	43.1092	55.4275	59.9287	44.6659	235.195	49.3658	61.5408	92.3755
HIT 181	32.2205	43.0926	34.3558	39.1964	40.0407	38.194	40.5819	33.1494	73.4829	40.3381	36.0997	36.188	36.4567	35.0947	34.997	37.1887	56.3426	47.0718	44.8233	42.3948	118.584	45.7671	51.5772	43.179	44.8395	38.8201	41.9054	38.9195	78.9216	43.8466	58.0927	39.8936
HIT 1813	57.9059	85.1131	192.86	87.3768	65.8384	38.5453	714.846	540.505	591.458	600.638	210.62	164.65	132.601	701.972	307.696	43.0616	147.087	892.139	56.1103	59.7421	74.3656	52.2665	73.4973	366.241	49.5697	40.8621	64.5698	52.8214	252.437	65.3719	58.1849	72.019
HIT 1814	32.148	37.2668	32.2405	34.1408	37.2307	36.5323	32.8334	32.5963	32.7816	32.1694	33.8137	32.9727	33.3573	33.6532	33.1623	35.8228	44.3375	42.468	41.2622	40.3629	44.2957	49.2609	43.1733	42.0026	36.7773	36.9569	39.5353	36.8573	67.5684	43.6895	47.0593	36.043
HIT 1815	32.6494	41.7433	34.4186	36.1365	38.1342	38.4557	39.8556	70.6895	46.3193	45.1506	39.8655	37.1746	35.7228	36.5928	51.409	38.4056	401.85	1932.85	64.2716	71.9577	85.0292	45.2331	60.234	877.452	55.1839	38.4484	607.768	35.8372	75.443	42.6221	80.3746	48.174
HIT 1819	69.6049	119.209	93.2804	95.2753	47.9623	39.0283	290.048	19317.5	8539.79	5419.26	1132.03	394.909	194.871	1835.28	10312.2	39.658	463.12	1450.5	52.9646	58.1169	46.652	52.5918	55.3869	606.888	628.675	42.9666	44.3643	65.0365	98.0657	221.145	1218.82	52.3365
HIT 182	31.757	37.0914	33.3899	32.6501	37.0366	38.5782	33.1695	32.1535	33.0248	37.59	33.5286	33.2568	33.5525	34.2053	33.2081	35.9212	45.8752	46.6584	39.2763	40.3116	41.8258	45.8144	40.7535	41.3192	38.5336	36.2879	39.5333	36.0246	62.4268	44.1078	52.0579	35.6821
HIT 1820	32.5938	37.7242	33.5345	34.6054	36.6764	37.2389	33.7545	35.978	33.6205	34.5099	33.754	33.2943	33.707	33.5497	34.2661	35.2177	54.0561	65.5673	40.8946	39.045	40.9893	41.2019	40.5617	49.8906	48.4577	35.9643	39.7988	36.8563	57.6101	43.134	66.7382	37.562
HIT 1821	37.1343	44.927	40.3151	42.8561	38.7658	37.6591	35.5273	3820.26	1499.95	853.672	169.401	87.6621	42.546	34.4815	1802.2	35.1702	120.537	307.401	42.7143	42.9157	42.2555	39.3661	38.7801	136.299	128.641	36.493	38.996	38.5917	58.26	76.9808	253.673	37.721
HIT 1822	33.9733	44.731	33.4892	35.3089	38.4315	39.0023	35.2128	33.8243	36.1658	35.3408	34.3021	35.2739	67.5424	34.31	33.6683	41.3038	38954.4	44955.6	2903.65	50039.2	900.673	1311.65	6666.84	20289.3	26424.5	18078	246.966	2910.39	13388.5	2848.11	358.603	10712.1
HIT 1823	32.4356	37.7099	32.6468	33.1792	37.2073	36.3952	33.1373	32.4134	32.9288	34.6012	32.4536	34.5922	33.8903	33.386	32.9008	34.9343	51.5631	46.8868	42.4246	43.3225	41.8624	47.8202	47.4848	45.5423	37.2289	37.9812	40.619	36.2601	68.681	46.7451	53.5916	37.1791
HIT 1824	33.2785	41.4637	38.3809	34.2768	68.8827	96.1566	34.8466	37.2765	34.1584	40.9902	34.6828	61.9999	346.764	33.8095	37.0322	96.2623	14314.2	12503.2	2210.18	13581.5	281.337	2377.34	3499.34	8562.64	8366.67	10324	721.759	2598.28	3996.4	1655.92	1017.55	8782.7
HIT 1825	33.3871	40.7991	34.3488	35.0774	38.6435	37.4705	39.0652	33.8885	40.7469	39.2112	35.601	37.3829	36.1152	35.0518	35.3875	37.778	382.834	403.261	342.495	200.387	81.2219	597.857	109.589	440.431	112.35	217.237	1196.79	501.11	80.5818	112.939	1034.74	2201.91
HIT 1826	31.8358	37.8139	33.5631	33.7763	36.6607	37.3447	33.6262	32.3457	32.9692	34.7356	34.872	33.6944	33.5244	35.4305	32.859	35.3432	1078.73	800.836	673.553	1668.53	870.842	3151.79	137.753	175.055	90.7798	327.766	5454.68	1200.01	72.46	1762.34	360.454	1870.29
HIT 1827	31.9001	39.5414	33.2201	34.8144	38.6142	36.8733	34.65	33.5617	35.3094	33.4452	34.0761	33.8498	33.7727	33.2663	33.6099	35.9249	93.6526	266.286	112.987	43.3968	44.2555	76.3511	46.7099	128.947	41.2656	77.9386	194.247	262.719	64.7677	43.2177	157.861	277.781
HIT 1829	31.684	36.8082	32.6988	32.9316	38.0644	38.2355	33.6743	32.4324	32.6329	33.4665	33.8958	33.5892	34.3356	33.3655	32.5567	35.5873	50.9445	49.2351	44.7627	45.7894	42.8447	51.7845	48.8777	45.1114	41.294	38.8398	40.4119	37.041	58.1584	45.2146	57.7736	35.9573
HIT 183	32.33	37.5368	33.2454	33.5644	38.4576	38.2737	33.779	33.0264	33.6099	34.2041	33.673	33.1945	33.4047	33.3645	32.6941	36.3089	45.0471	39.4132	40.1348	41.0667	39.9267	41.9744	39.5103	39.6207	37.8606	36.9239	40.2759	36.98	62.2994	44.6548	52.8629	36.3189
HIT 1831	32.3144	37.6683	33.2504	33.8643	38.3082	38.7988	33.7389	33.6755	34.2315	36.2316	33.7032	34.6562	33.5062	33.6354	33.5562	36.0821	47.8439	42.3833	43.6641	42.7485	41.2075	41.376	41.1336	42.0743	38.0575	36.782	40.0217	36.3689	58.4086	44.2936	50.4409	37.7647
HIT 1832	32.4378	36.7273	32.9804	33.7917	36.7101	37.7211	34.1214	32.9432	33.2358	33.6805	33.3721	32.9131	33.8902	33.8268	33.9671	34.056	41.8258	39.2424	41.7469	43.6529	44.1026	46.0357	41.3223	40.1666	37.1174	38.4566	39.5048	36.1989	65.2999	44.4981	52.5158	34.596
HIT 1833	32.3808	35.9333	32.4883	33.5903	37.2623	36.2143	34.1394	33.1585	32.6247	36.97	34.0954	33.4174	34.0479	34.4262	33.2005	36.3537	46.2649	39.7809	41.2374	49.0271	42.8046	41.5882	35.4167	41.674	39.6622	40.1495	39.2805	37.3041	62.1283	39.7624	44.2926	36.55
HIT 184	33.0377	43.5519	34.8687	35.2527	37.9724	39.8578	34.6774	33.1702	34.701	37.7693	36.9111	34.6027	36.1343	35.2865	34.5838	37.0976	55.87	49.1086	47.1908	46.8591	50.0709	46.3391	55.7556	44.3665	42.4874	45.5539	38.8505	36.759	73.3341	43.6903	55.0428	38.2641
HIT 1840	32.3703	35.9353	32.3226	32.9248	36.7691	37.8358	33.2905	32.7587	32.5284	33.4219	33.589	33.2231	33.202	34.0983	33.1622	36.2613	43.8209	39.524	41.8946	44.0983	39.7527	41.1371	42.4168	39.5119	37.5578	37.7412	40.369	37.633	56.9093	41.17	49.5516	34.913
HIT 1841	31.5473	35.5359	32.7177	32.5626	37.8459	37.2364	33.4042	32.6145	33.0467	33.086	33.8678	33.5312	33.0038	33.575	33.209	35.5494	45.4636	43.9789	40.3852	40.4797	41.2963	36.915	38.7472	38.9151	36.4667	36.7478	41.219	37.4095	63.0044	41.1881	50.1647	35.7079
HIT 1842	32.2143	36.6868	32.7253	33.74	37.4828	36.6149	33.4516	32.6448	32.9962	34.3526	33.8322	33.5353	33.0307	33.0614	32.6888	34.754	102.874	40.9157	53.9365	123.09	158.697	56.5037	45.4443	97.7178	41.6252	85.1588	896.826	41.1347	73.1716	44.3471	171.401	81.8712
HIT 1846	32.3817	35.9673	33.5858	33.2659	36.0318	35.268	33.04	32.1215	36.9675	37.6249	33.5313	33.8439	32.579	33.2673	33.365	36.0061	43.9747	45.456	38.5057	41.3832	41.0364	39.8275	39.1287	37.3379	37.4689	38.4972	38.4395	36.0261	53.6284	42.4398	51.9665	35.5879
HIT 1847	32.0781	37.1397	32.5238	33.6639	35.2777	37.3573	34.2118	32.7218	33.3366	34.1484	34.2812	33.042	33.6766	34.2813	33.5576	35.1495	47.2347	44.8666	41.2093	39.874	41.4089	48.6002	46.0369	41.3666	38.7287	37.5822	39.6737	36.4188	69.1783	44.2294	52.879	37.5865
HIT 1848	32.0599	38.7664	32.5998	34.0364	36.9351	38.1658	34.1008	35.0386	34.2448	37.3873	34.4075	33.9742	33.6731	34.172	33.4341	35.0267	43.7734	42.0951	42.6009	42.967	40.6749	41.3274	41.7977	41.0718	37.5043	35.5178	37.4569	36.2477	56.642	43.104	44.5186	37.0178
HIT 1849	32.1982	36.5561	32.4596	34.0044	38.1374	37.128	33.2766	33.0185	33.5178	34.4497	34.1224	33.5706	37.7237	33.5538	33.3876	35.546	48.5253	44.9952	44.6087	47.1333	49.769	231.196	53.546	42.1584	39.7499	37.6167	41.1872	37.1469	59.4366	43.4509	51.7327	38.2815
HIT 185	32.1622	46.9186	33.5316	33.6848	35.7294	37.8591	34.5784	33.006	34.4302	35.2367	34.3025	35.7023	33.4657	33.5483	32.6983	36.9709	43.5146	41.4148	40.7923	39.6427	43.8473	40.3554	40.9058	38.0291	36.2935	36.6925	39.3777	35.554	55.157	42.3127	55.5684	36.5838
HIT 1850	34.853	37.7913	33.9592	34.1445	36.6814	37.3271	32.7581	33.0173	32.8844	33.582	40.6955	33.5265	33.9942	36.0262	33.7586	35.7624	40.6838	38.9873	39.4187	41.32	44.8817	708.674	43.1397	39.5115	44.666	38.0468	39.5468	37.0302	56.9625	51.288	60.8469	36.4382
HIT 1851	32.8404	38.3073	33.8904	34.814	39.6259	39.9716	34.6994	32.5334	35.1735	34.3939	35.1245	33.7952	34.9117	34.9374	34.1781	37.3156	58.4379	50.6685	46.916	46.6783	66.5166	8105.21	59.2199	43.4365	42.5226	37.1848	37.8673	36.2104	62.8647	43.6219	49.6576	37.7705
HIT 1852	32.0177	37.8153	33.0891	33.6103	37.8608	37.3486	33.8178	33.2997	33.801	35.0327	34.1102	33.4993	35.4338	33.3991	33.2397	36.096	496.318	53.5797	40.1466	42.9988	107.341	326.82	147.755	42.34	111.471	717.018	592.893	43.5593	60.0006	43.3111	407.702	64.3014
HIT 1853	32.0083	35.7496	32.7799	32.4638	36.9273	37.7713	33.6687	33.1961	33.6114	32.7309	33.8847	34.6187	34.8534	32.7717	33.2043	44.0427	44.124	43.2637	40.9143	43.325	40.3916	98.2091	45.9081	39.9591	36.2866	39.2842	39.6442	36.9387	54.9088	40.0195	50.6557	35.5478
HIT 1854	32.233	36.1036	32.6401	34.0436	38.6239	37.6482	33.5549	32.6152	33.2099	34.0271	33.834	33.4829	33.0524	33.7859	32.6598	34.7821	43.5744	38.6288	39.1499	39.9041	41.2742	49.3678	39.1353	39.6638	36.8943	38.3312	42.7325	35.8853	60.303	41.8974	50.6731	35.3117
HIT 1858	38.4736	42.686	65.3649	42.7331	63.1729	39.1106	35.6216	33.8388	34.9556	35.0531	43.9165	34.1634	34.0737	34.4968	33.5193	35.8677	53.5127	55.8888	49.5334	45.8963	47.2517	47.589	44.4157	42.5109	37.9184	40.272	39.7167	37.4673	75.2778	45.6952	58.3649	37.1256
HIT 1859	32.3143	38.8109	123.71	57.1079	95.4299	38.8573	35.3565	33.0403	34.5871	34.392	53.273	34.3488	33.7674	33.8292	32.9348	37.9291	48.4855	47.0356	41.5193	40.5743	42.051	42.2853	39.876	42.6029	38.0013	37.5126	40.0651	34.9762	666.024	43.2984	48.014	36.2919
HIT 186	31.9518	36.4851	33.0162	35.4249	37.3241	37.9248	33.8412	33.1083	49.9183	37.4881	35.948	33.1471	33.1653	33.3205	33.4464	35.2129	42.3496	39.0851	38.6401	41.0334	43.4434	39.8018	39.5296	38.737	36.1089	36.261	38.9281	37.1801	63.0256	42.4134	52.8662	35.8404
HIT 1860	36.8901	36.7961	79.7058	46.6626	72.6292	36.7349	34.7127	32.3463	33.0799	34.5881	41.6841	32.9837	32.2909	33.4509	32.6465	36.1621	47.0217	44.7863	42.3178	42.8627	39.4837	40.5491	41.6284	40.2585	36.7353	37.2692	38.3654	35.5371	64.3467	41.7649	51.2625	36.8315
HIT 1864	31.8695	35.6615	33.0785	34.0554	37.7015	36.3972	33.4068	33.0767	33.113	34.1352	34.4136	33.1546	33.6177	33.4126	34.522	35.6967	59.6383	47.5125	50.7029	51.7994	124.363	67.7886	95.1316	51.9301	41.9443	115.354	181.601	39.5034	57.1278	80.3223	51.9118	51.6604
HIT 1865	33.1164	50.2162	33.4608	33.5285	38.4571	38.4882	33.3657	32.5239	32.7537	33.1566	33.873	32.7452	32.5805	33.8605	32.2805	35.6993	108.349	39.3462	118.055	135.007	488.317	165.057	411.206	161.735	49.6879	577.239	1115.14	38.346	60.033	372.211	76.7096	165.31
HIT 1866	56.269	39.3331	44.3194	39.9037	39.522	37.7047	36.9999	38.8504	35.3428	42.6061	35.072	51.8877	86.8699	34.3274	33.8296	51.8672	647.646	113.917	704.56	767.847	4209.12	1155.76	3152.55	1020.89	212.166	4683.48	10133.1	66.6245	358.392	3508.82	549.805	1032.04
HIT 187	32.7816	42.3953	34.4881	35.8768	37.3508	39.2255	35.7186	33.7307	35.566	72.2871	38.3726	35.9291	34.7996	34.3025	35.016	36.7479	174.764	52.9382	49.79	43.586	96.7809	118.818	123.006	44.1199	40.6078	45.0977	39.2453	38.0366	347.764	42.9354	57.491	37.9181
HIT 1873	32.9533	37.1763	33.843	35.1039	37.5453	37.0439	37.2958	32.8058	37.9668	35.8882	34.3653	35.2386	33.562	34.7109	34.6385	36.1683	93.7914	174.988	222.841	65.4979	51.3808	88.5132	98.7685	93.0687	79.5825	79.467	131.555	240.415	65.411	54.484	96.0651	215.41
HIT 1874	31.9684	38.0574	32.9557	33.0397	38.3083	37.8937	33.4785	33.3087	33.7411	33.9572	33.2315	33.611	33.5267	33.4263	32.7362	34.6216	44.3931	40.1141	41.7658	41.4908	40.9894	41.7035	41.8633	41.9127	37.7026	37.762	55.2631	35.2078	58.5727	44.8932	51.4475	38.3465
HIT 1875	32.8356	43.6931	34.3139	34.0105	39.3154	42.2301	35.4734	34.6523	34.4159	34.72	35.025	34.8058	34.9769	34.493	34.2077	37.4104	49.6728	44.5	44.9682	44.3996	40.1615	41.9002	40.6247	41.3534	36.3908	37.7605	37.895	34.9473	64.1852	45.3932	57.5168	35.7663
HIT 1879	33.081	38.6978	34.384	35.6888	36.9863	37.8771	39.9022	34.3293	51.7853	37.1723	35.2294	35.8339	35.6463	34.315	34.0807	37.8904	1948.81	1810.23	401.367	276.658	65.5704	2293.39	828.771	1015.63	110.703	449.651	138.801	231.177	80.5218	643.649	706.44	258.592
HIT 188	32.6197	36.0813	32.9027	33.7403	36.9803	36.8916	33.1738	33.8042	33.4639	33.8575	33.5142	32.0866	33.8222	33.0266	33.0013	34.6741	46.9323	44.5262	40.7888	42.0895	42.8688	44.1708	48.0117	40.1379	37.1748	36.9797	39.0475	35.5592	51.099	37.2056	46.6833	36.9636
HIT 1880	32.1748	37.9592	32.8965	33.3544	37.4477	37.2157	33.5777	32.9303	32.7883	33.6645	33.6066	33.2127	34.2275	33.8708	33.155	34.715	477.513	1033.25	1061.56	234.263	1948.81	1249.95	195.201	362.839	59.752	228.815	65.7764	185.752	99.5847	455.846	90.6743	42.2243
HIT 1881	32.2224	36.4008	32.6978	33.5286	37.3484	37.6243	32.9415	32.8862	32.9047	33.8425	33.9591	33.831	33.6398	33.5026	33.0062	35.9568	185.023	539.251	79.7587	52.8113	43.5804	367.944	69.6307	128.062	38.4311	129.668	40.1132	86.5039	64.7221	117.873	49.6053	36.3698
HIT 1882	32.4572	37.1304	33.4319	33.0621	39.2983	35.1286	33.4184	32.8713	33.2489	34.4234	34.0717	33.515	33.3339	32.6712	33.0249	37.0046	48.0497	75.9709	49.7784	42.8134	43.7667	76.7911	43.6599	52.2953	37.7296	53.4698	40.9153	42.678	63.7456	62.8581	52.3509	38.875
HIT 1883	31.9342	38.7454	32.5996	35.3854	38.3606	37.0652	32.5797	32.9982	32.4576	33.9712	33.7834	33.2501	33.0476	32.6048	33.0905	35.6409	41.1085	38.6051	39.2991	41.2472	39.7726	37.3078	36.9379	38.5376	36.0785	36.3528	41.3245	36.9738	58.2834	41.5129	45.8331	35.4641
HIT 1884	32.0389	37.4714	33.2783	33.5715	36.6393	36.9743	35.1772	32.7867	32.9344	33.575	33.8826	32.9603	33.0286	33.6617	32.9414	36.1141	42.6323	47.1694	41.1207	41.652	44.9064	59.9112	42.8467	41.0042	36.6981	46.0501	39.4473	37.9028	52.7236	50.9674	48.5221	36.4631
HIT 1885	33.1165	38.7399	34.8594	34.7921	38.052	38.142	34.0384	34.7283	34.6123	37.1014	35.3961	36.0073	34.0222	36.418	34.7988	40.0463	7017.2	16401.3	966.05	866.069	1771.73	1548.18	13320.1	944.759	1558.6	46.2041	7662.53	116.006	2997.73	47.9984	657.701	397.496
HIT 1886	32.4779	37.1054	33.4704	34.1659	36.7197	36.7228	34.9384	32.7895	32.8732	33.8659	34.1512	33.4907	33.5705	33.7886	33.319	35.7477	830.276	2049.56	146.586	132.714	183.795	217.295	1652.5	141.68	215.233	38.8331	1617.14	51.9678	354.071	42.1651	112.41	92.8594
HIT 1887	33.0306	39.4634	35.8699	35.1269	36.9142	37.7831	37.3584	33.6294	33.8513	35.0229	35.3439	35.1417	40.1828	35.1641	34.3177	37.4776	20245.2	102170	4262.54	3995.99	8450.58	16974.3	54253	4305.36	5741.08	145.524	28354.8	441.133	16081.4	68.9357	2370.05	989.335
HIT 1888	32.1129	37.9661	33.0571	33.4708	36.896	39.0633	33.1085	32.9537	33.2086	34.3397	33.1556	33.1702	33.0134	33.6482	32.895	36.2152	188.696	399.572	140.89	81.8529	98.9772	113.085	425.827	81.4879	67.8328	223.53	915.344	43.4432	279.493	45.3188	73.4889	65.1629
HIT 1889	32.6999	38.268	33.5043	33.4279	37.0483	37.0361	33.1791	33.1634	33.0015	33.2858	35.492	33.1622	33.495	33.625	34.422	35.6414	54.1601	46.1817	59.4527	46.0945	45.1352	41.4228	151.77	53.5597	43.3646	37.4995	199.741	41.5263	67.0718	47.2882	55.5641	37.6557
HIT 189	31.7387	37.5465	32.8083	33.5011	37.1945	38.3169	33.3966	33.6626	33.6567	34.5938	34.2815	34.4905	33.1247	33.7824	33.2533	35.4047	42.6249	38.3727	37.6809	40.6265	42.6682	52.0166	45.4312	39.5816	35.1945	38.5848	36.9967	36.2741	54.102	40.8508	68.5844	35.722
HIT 1890	32.3898	36.1558	32.6598	33.7949	37.0671	35.955	33.1191	32.9675	32.4865	33.6125	33.4796	33.4699	32.324	33.7279	33.1814	36.0099	51.3818	54.6437	42.6432	49.7858	42.3584	44.451	44.6669	44.1737	38.4686	36.6248	38.2298	36.7446	59.207	41.0264	48.0381	36.6562
HIT 1891	32.7424	37.2654	33.6057	35.0958	37.9216	36.9489	34.5147	34.1889	162.42	36.9306	34.6238	34.4438	33.9202	35.025	34.1402	37.767	417.569	802.14	158.634	173.07	75.7012	191.435	121.969	211.534	129.054	112.68	147.897	247.071	93.8678	79.3047	125.372	264.082
HIT 1892	32.0728	37.9896	33.5327	33.1789	36.5903	37.5386	33.3794	33.3998	32.1525	34.2209	33.6136	34.3332	33.3318	33.2356	33.1966	35.7742	53.4381	615.543	45.7087	43.9347	41.9119	54.2157	70.4535	40.0336	43.6309	75.0633	213.131	37.4908	58.8391	42.9972	50.6408	113.185
HIT 1893	31.9839	33.8209	32.9693	32.2067	35.0284	34.239	32.9185	32.9263	32.8159	34.2938	33.2665	32.7191	32.5887	33.2792	32.2665	34.6299	50.2979	387.222	42.0707	42.1462	42.7004	49.3914	62.0901	38.5287	39.2917	67.1756	163.898	33.7129	57.1997	42.6571	48.8839	79.7506
HIT 1897	32.3659	37.1982	35.9421	34.9065	38.7247	37.169	33.7595	47.489	733.95	53733.8	38.1477	22125.4	59.0893	34.3956	44.6661	39.7903	135.432	5399.38	99.4536	134.394	63.4964	46.7234	69.9186	2587.06	1839.11	164.578	139.417	94.2999	58.9422	54.5454	165.164	243.799
HIT 1898	32.025	36.0602	33.4592	33.5857	37.4908	37.0082	33.4843	35.5064	103.63	7288.74	34.4879	3279.82	35.3797	33.5861	34.2248	35.203	53.4356	634.968	50.9577	67.2607	42.9855	41.318	44.2723	350.118	219.746	54.702	52.4087	43.2726	62.2248	44.7381	66.3301	59.3863
HIT 1899	42.344	48.3828	100.962	46.7541	72.4627	39.1084	35.4903	63.0937	3411.63	116546	119.165	33103.4	261.245	42.2472	94.982	97.0693	1846.88	94894	585.958	644.836	504.999	174.144	739.37	50712.7	38585.7	2332	1676.63	717.382	61.5584	350.496	3539.76	3159.91
HIT 19	100.218	41.8307	52.7641	49.6261	186.908	39.9412	36.3702	81.3617	35.5728	56.9679	56.7901	38.8902	35.1723	42.1885	34.6845	39.2053	1648.19	631.203	92.5371	211.563	1895.13	143.8	84.6721	1579	212.749	660.254	4939.11	109.196	728.662	80.686	353.597	2125.31
HIT 190	40.9906	43.6378	40.599	39.964	68.026	92.7818	37.2044	36.2053	130.285	247.172	55.9586	57.9396	37.693	35.7885	37.6698	37.5858	21066.5	499.343	908.176	71.3807	11864.9	539.704	426.576	88.9529	222.282	68.1735	71.5607	39.705	49579.1	169.105	182.311	57.258
HIT 1900	32.7357	36.8276	35.8863	34.5166	39.3124	39.2414	34.0726	47.1519	721.614	60156.2	35.8477	17637.3	52.3053	33.9948	49.3795	38.9972	239.901	7646.5	70.1069	48.0317	62.8194	48.9025	79.6074	2559.95	1973.24	227.468	159.562	76.5454	58.6811	54.4135	165.881	240.08
HIT 1901	32.407	36.7508	34.3268	33.079	36.141	36.6212	33.2428	34.4415	86.0574	10194.8	34.579	1493.12	35.5675	33.1376	35.5357	35.5637	59.7412	892.978	41.5923	38.7944	40.9428	44.1044	47.5131	376.904	290.099	66.8098	57.9512	44.9032	55.6508	42.629	70.1505	70.3103
HIT 1902	36.8825	38.9752	54.512	38.5449	51.6307	37.7902	34.9028	59.6205	1625.42	78011	57.0833	24458.2	160.17	37.523	65.212	55.7443	594.44	24518.9	747.163	1566.16	161.889	87.1697	239.914	11605.2	9096.66	1081.49	732.192	227.089	69.3819	117.372	761.182	899.357
HIT 1906	93.4814	53.6281	113.562	37.2352	47.1784	46.2356	44.1526	36.9655	165.376	51.9733	38.027	51.6625	39.4507	38.2649	39.4781	38.4064	60.2078	54.0066	50.3485	47.269	51.0278	48.1874	49.7724	44.9071	41.0099	41.2563	45.5014	41.1625	137.787	48.7529	55.0004	93.276
HIT 1907	32.5007	38.1263	32.9927	34.6013	37.2458	37.0625	35.0766	33.3875	33.4509	35.7057	35.0306	33.5847	34.7207	34.6981	32.4256	36.3345	45.0711	43.303	50.086	39.998	43.2621	43.8711	45.3579	41.2085	39.1138	37.534	37.6932	36.798	59.5714	42.4333	54.2843	37.5594
HIT 1908	37.4612	47.8108	36.6561	38.7762	45.8629	42.3953	48.9203	39.9339	39.6398	45.4725	38.4054	40.9939	41.4233	42.6635	38.8883	40.2169	68.5764	62.7609	61.9519	54.4564	51.9542	54.3389	62.6495	50.7516	48.7348	41.0451	50.0725	44.1903	79.9328	50.8614	65.132	48.2231
HIT 1909	32.8459	41.5329	33.7772	34.2482	40.6307	38.3342	35.5114	35.1843	4006.87	47.4629	35.7714	36.2439	35.4132	36.6787	34.8163	47.0054	24955.4	16045.1	9606.39	12622.3	6831.59	16238.3	3749.87	9850.76	16024.8	1611.37	2393.93	48319.1	1628.88	2061.86	43335.3	13282.9
HIT 191	32.1426	37.4533	33.1047	33.7692	37.8582	38.4387	34.4286	32.9856	40.7537	33.9631	33.6356	33.3293	33.6369	33.3643	33.7107	35.2374	3511.17	91.6079	103.833	43.4985	1422.64	222.243	53.8491	47.2197	61.0275	39.8723	42.4354	36.7754	9930.21	52.7424	54.6387	38.072
HIT 1910	32.2413	36.2932	33.9316	34.9193	37.0592	37.0498	35.4236	33.1787	38.2358	34.0379	34.059	33.3245	33.208	36.2758	34.8359	36.0632	336.775	107.201	171.502	194.634	174.038	287.471	122.009	142.711	313.446	75.1868	46.8945	1202.93	75.2562	147.539	938.482	60.7914
HIT 1911	32.032	36.9091	33.2566	33.2403	37.1639	37.1997	32.8323	32.5463	33.2015	32.933	33.5837	33.1832	33.3455	33.5972	33.25	36.2971	298.701	106.068	246.766	295.231	257.986	438.697	46.4054	232.895	325.445	39.4218	40.3233	1428.77	59.6692	46.4121	1888.36	36.756
HIT 1912	33.1123	40.4864	33.6958	34.0603	37.6255	37.2458	35.0381	32.5307	33.1728	33.4831	33.9455	33.1701	33.3637	33.4675	34.2124	36.0899	63.3678	49.1613	55.6544	56.9115	50.0541	74.8337	45.5051	45.8194	50.5237	42.2496	40.2764	92.604	60.9545	42.9052	69.7836	74.3417
HIT 1913	32.1905	35.3636	32.7858	33.0738	38.4273	38.8028	32.9502	32.6624	32.7762	32.6959	33.4418	32.4533	32.8314	33.4783	32.8735	34.0442	115.278	40.0496	117.837	130.142	51.1263	115.065	39.719	57.441	111.764	37.1864	39.8415	232.775	65.2882	47.5931	98.5501	189.237
HIT 1914	32.4629	38.1848	33.6963	33.3026	37.7144	37.3103	33.7428	32.9386	33.5334	34.2615	34.6517	34.3189	33.0664	32.8363	33.2278	35.6636	389.393	64.5323	373.383	520.162	180.659	696.903	40.2564	160.073	364.825	38.384	56.8625	1071.66	60.5065	43.2604	567.271	766.68
HIT 192	31.9987	36.6097	33.2494	58.1168	36.2311	37.1392	33.6741	33.072	391.793	214.486	56.4818	246.908	33.3047	33.7869	33.4064	35.6016	22260.3	778.589	1059.26	56.8244	30055.9	1687.35	3249.28	137.483	2234.05	201.965	400.253	36.1411	53628.4	117.13	2543.15	198.726
HIT 1921	32.5515	36.6095	33.8398	33.9974	38.4271	37.4599	32.8259	32.8081	36.6303	35.036	33.7817	33.7112	34.2328	35.132	33.3437	35.7476	46.746	44.6074	45.413	44.7815	42.832	42.949	44.594	45.5246	38.2162	38.2254	40.9101	35.3962	60.1559	55.9954	58.9796	37.7398
HIT 1922	32.2025	36.9774	33.0333	33.4047	38.2032	35.9358	33.5296	32.5577	32.4174	34.6789	34.2001	33.4111	33.4323	33.8028	33.1528	35.7769	43.1488	38.9929	40.0466	41.8561	40.9373	43.4041	40.6115	40.6379	37.6377	37.112	40.4322	37.9977	63.8592	42.589	53.0014	37.0751
HIT 1923	32.2759	36.6034	33.3918	34.0873	38.3485	38.4063	33.8815	32.4695	33.3528	35.3522	33.5815	33.3936	33.6368	33.6362	33.5066	35.6893	52.8148	48.4809	46.6115	50.6648	47.6021	79.4812	41.2071	41.5596	38.8626	38.8525	45.9464	50.2532	58.7064	43.448	55.1127	51.2845
HIT 1924	31.5923	35.6403	32.9574	33.3286	37.4691	37.7677	33.25	32.2799	32.1559	33.7944	33.2788	32.5823	32.8855	33.5216	32.9861	35.8203	39.9067	45.3109	39.0239	39.2544	43.7735	43.5185	42.7095	37.0462	36.9331	37.9544	42.0693	37.1213	57.3956	41.6665	49.0463	35.4476
HIT 1925	32.7467	39.1619	33.3974	34.2264	35.9701	39.0555	33.6508	32.9475	32.6804	34.2832	34.2268	33.3199	33.0839	34.3964	35.1666	40.2074	42.839	50.0436	39.7103	41.5143	45.2605	47.6357	44.9314	41.3878	42.0277	36.807	47.1137	38.7852	66.7871	40.9758	48.482	35.5418
HIT 1926	66.5826	41.2618	53.0963	37.6173	40.3903	38.0457	36.7919	34.0227	33.5804	36.2736	34.6602	41.2874	43.7545	33.6268	34.9584	48.3025	198.013	640.178	115.25	453.451	2747.53	97.9998	125.819	50.5822	895.063	421.595	149.081	41.3212	236.309	42905.2	117.999	559.145
HIT 1927	32.3087	36.8323	33.4384	33.4005	39.3714	38.6591	33.6584	32.8589	33.4917	34.6142	33.7073	33.387	32.9113	33.0831	33.5715	35.7806	42.5172	39.9249	39.2555	39.9787	41.103	41.3162	38.2521	38.0319	36.2292	37.5562	40.9214	36.6469	62.1626	45.8306	55.8581	36.629
HIT 1928	32.5667	37.5782	33.4699	35.9342	35.5056	38.2366	32.7137	32.7288	32.4724	34.4889	34.2021	33.158	32.7148	34.1767	33.2734	36.1535	47.3533	40.2032	39.5958	44.1752	40.3369	39.0026	38.8727	41.5071	39.4426	37.9828	36.599	37.2023	58.7931	41.4757	50.3393	36.4553
HIT 1929	31.9846	36.3332	32.7837	33.5014	37.4348	35.8128	32.7438	32.2447	33.6192	33.0077	34.1157	33.1075	33.5583	33.9392	32.7505	34.7736	48.2108	40.9078	39.1522	39.7923	42.6708	43.5585	43.1406	42.785	38.7655	39.7282	40.9836	35.4196	64.9964	46.689	57.889	35.5874
HIT 193	32.4312	38.1373	34.505	35.4445	36.8958	37.272	37.4021	33.6243	33.7745	37.0226	36.3725	35.2472	36.4638	35.4006	33.702	36.3852	99.6986	111.416	96.1025	43.2062	246.678	74.5513	172.985	43.4452	97.2457	92.5521	60.3973	41.3743	13881.5	54.9955	69.4868	100.724
HIT 1930	32.1814	37.3659	32.9383	33.259	36.9976	35.6293	33.9754	32.0659	32.9164	34.573	33.5287	33.6743	32.9999	33.5858	32.4619	35.9773	80.733	73.1585	124.919	551.256	88.0337	115.509	70.2357	50.136	120.284	40.3422	40.4282	45.7742	569.009	43.713	151.869	36.5782
HIT 1931	32.1265	35.2462	33.2855	33.4393	37.0559	36.0914	32.6752	33.5789	32.3954	34.8881	34.0339	34.9032	34.6417	34.4623	35.8234	35.7094	58.1473	51.7978	71.4356	369.001	353.522	903.007	90.3289	53.912	64.1505	58.3722	91.8055	39.8792	556.005	65.6844	95.4679	45.1068
HIT 1932	31.6516	37.2898	32.451	33.0606	37.3088	35.7428	33.3828	32.3868	32.5323	32.1613	32.9876	33.259	32.6832	33.4155	32.324	35.4523	38.4507	37.6632	37.7711	41.7114	36.7304	38.03	39.4279	38.815	37.0666	36.6002	37.6461	35.3661	62.6692	43.2014	50.6921	35.4414
HIT 1933	32.3034	37.1878	33.2661	34.1508	36.5923	36.3058	33.8266	34.0749	33.7402	34.5125	34.4898	34.0709	34.0054	34.2739	33.6067	34.753	3774.82	3286.87	2105.4	797.421	158.792	211.206	1506.27	947.652	481.605	5483.35	11978.2	454.718	4469.7	106.57	1292.74	192.129
HIT 1934	32.1922	37.0267	33.4564	33.9312	51.9764	70.4659	34.5866	32.6706	33.1798	34.0814	33.9858	33.8972	135.152	33.7146	33.4209	37.0706	567.457	553.697	392.367	213.871	88.5947	74.1836	359.892	183.879	235.564	746.582	1528.16	91.5771	735.303	54.0511	284.02	65.3416
HIT 1935	33.0896	43.6936	34.0023	35.0662	191.602	367.691	34.3514	34.3246	34.7166	34.1576	34.1581	34.6014	151.99	33.9301	33.2493	37.5569	20611.8	25873.1	15330.9	6910.75	911.855	1441.16	9271.06	8701.88	1906.01	22358.9	68014.5	1283.52	44933.2	1223.53	9256.85	505.667
HIT 1936	32.5139	39.1047	33.3117	34.492	37.7725	37.1468	33.67	33.1966	33.8592	34.8107	34.7642	34.0286	33.8647	34.0388	33.3734	37.688	11016.4	28322.5	5617.27	3593.84	4620.53	5645.35	25417.3	3016.6	1990.08	10554.6	27318.2	363.86	20556.8	269.399	2134.99	1637.21
HIT 1937	32.0959	37.1759	33.1829	33.9847	37.663	36.7797	34.8078	32.9114	33.0332	34.2077	35.0421	33.4199	34.3669	33.904	33.485	35.8301	219.45	226.898	219.675	44.741	250.164	289.498	82.3854	60.2682	88.5793	546.74	360.449	39.5539	1127.18	48.6359	93.4638	55.1619
HIT 1938	32.7294	38.6085	35.5118	34.6325	38.3091	39.566	35.7672	34.9914	33.1839	35.4013	34.5764	41.263	41.135	33.6599	35.1449	47.9502	1628.81	5580.43	1236.13	443.819	1297.33	2052.19	1742.65	558.966	385.926	3220.47	3808.88	133.013	6985.02	101.854	635.807	469.225
HIT 1939	39.8195	38.4042	41.2502	40.8225	194.657	38.5877	34.6733	103.426	33.8395	46.5145	49.051	34.2873	34.1717	39.4975	33.5487	35.9682	4322.96	2467.6	95.8512	212.863	5930.11	238.445	112.189	9654.43	248.547	952.265	11672.1	134.207	1288.65	66.8322	364.729	3568.46
HIT 1940	32.1709	34.0356	33.0229	33.2537	37.7688	36.502	33.3391	31.8133	33.2207	33.2178	34.0333	32.6645	33.8238	33.0888	32.4662	34.826	39.9268	38.1941	39.6075	41.3565	38.8517	47.3956	43.5518	35.9348	37.9056	35.7205	39.5293	37.9865	56.2641	40.3814	49.9039	35.8658
HIT 1941	32.3771	38.6691	34.1429	34.9188	41.509	38.5043	33.8267	34.1713	33.8191	35.4476	34.5042	33.5341	35.1758	33.6807	33.7051	35.5751	104.237	70.3173	44.5958	51.0111	127.384	50.2928	48.8212	181.858	41.3154	64.4158	126.212	37.439	88.7484	46.3749	64.1417	90.3973
HIT 1942	31.7712	36.777	32.7458	32.8045	37.3486	38.2052	34.3078	32.1023	33.3977	33.7567	34.5529	33.5598	33.4043	32.9781	33.7284	36.1612	44.0389	41.3049	40.9732	40.3283	42.2388	42.4238	38.9678	40.6946	36.2352	37.0255	39.4565	38.8337	84.5012	43.9594	54.0812	36.6214
HIT 1943	32.4253	36.93	32.6196	33.2444	36.2689	36.3346	33.7979	32.3814	33.328	33.1225	34.0706	33.5365	49.4748	33.5763	32.6126	34.4183	50.5754	45.0131	47.1178	44.2298	49.3126	53.0304	52.4273	42.0283	58.4482	40.8437	40.0188	42.4355	66.713	42.5919	54.0612	39.0831
HIT 1944	46.1529	38.3703	40.6392	39.5926	3628.39	45.437	33.3724	36.9166	33.3988	35.4784	35.8715	34.3643	33.6925	34.119	33.9633	38.5524	57.7169	49.0049	39.9526	44.9385	71.7394	45.2392	64.4232	105.671	36.9321	41.842	97.3051	39.7059	1136.79	51.4147	55.3436	43.5821
HIT 1945	32.6304	36.597	32.9143	33.6869	36.8301	37.017	33.847	32.6978	33.3217	34.2652	35.5241	33.2735	33.5259	34.1532	33.3927	35.1471	233.149	42.2233	41.2275	41.2532	710.032	400.201	42.5952	40.8682	41.9615	36.8098	39.4355	35.9327	83.9711	43.1529	52.5042	257.997
HIT 1946	31.7583	36.4271	32.9101	33.2621	37.1711	37.1195	33.4471	32.5794	32.9969	33.5097	33.7987	33.3838	38.0692	32.9482	34.9371	34.8874	186.419	41.6464	38.7475	42.8677	460.632	244.749	46.0254	40.5167	42.2533	37.329	42.0403	39.4757	81.3137	39.9532	50.0659	153.314
HIT 1947	31.9791	36.7443	32.8159	33.6814	36.14	37.0204	34.1684	32.7861	34.0222	33.462	33.6014	33.3939	33.8152	33.5694	32.7412	35.4441	20515.1	214.637	123.825	77.2039	46309.6	25143.7	58.8215	52.559	287.943	36.6635	39.3622	35.7269	1661.66	47.5965	57.6399	11949.7
HIT 1948	31.957	36.9965	33.1031	33.4971	37.9811	37.3375	34.2254	33.1079	32.6016	33.8835	33.4896	33.5342	34.0281	32.8523	32.6602	36.7568	10740.8	1132.75	331.319	76.1134	23703.2	18006.2	655.272	57.7028	761.766	44.4398	809.819	245.779	1564.78	46.5978	59.3219	7840.14
HIT 1949	31.8941	36.4041	33.0361	33.333	37.6158	38.6148	34.3033	32.6474	33.4831	33.6798	33.8255	33.1498	34.0004	33.1802	33.2702	36.3379	1515.45	42.5722	54.2074	51.9423	11240.4	1774.8	43.4766	42.195	71.7856	36.2547	37.7927	36.15	124.088	41.7184	54.3863	1410.26
HIT 195	31.8538	35.3752	33.138	34.8201	38.136	36.9314	36.5195	32.7508	34.0024	33.3444	34.6665	33.9507	33.8375	33.6126	33.3245	35.5805	41.4292	40.0105	40.2009	41.2822	41.0024	39.9131	38.3862	40.1861	36.4041	37.8263	38.0862	34.4626	671.116	44.6021	52.1945	35.0607
HIT 1951	33.0696	39.0054	34.2206	33.948	38.8352	38.0082	34.1941	34.5895	104.142	37.1798	35.5929	35.3565	34.2907	36.8048	34.3778	38.0037	1344.49	654.365	389.148	659.347	232.41	2379.57	114.459	183.507	114.661	394.363	3400.52	1232.55	81.5815	287.138	135.184	1752.89
HIT 1953	31.601	35.1775	33.3957	32.9932	37.6454	37.3293	33.2959	32.5682	33.1407	33.2892	34.6083	32.3561	32.6943	33.3188	32.3738	35.3581	800.64	527.001	184.693	524.737	39.9358	1113.85	40.7445	66.4201	41.4287	196.979	74.5874	756.442	56.302	64.4687	53.1277	356.787
HIT 196	36.4014	43.6415	243.11	35.0444	64.4313	87.7216	37.3116	34.7173	108.35	78.0612	37.2865	39.2588	46.1465	34.9006	36.2203	37.8322	1170.21	3886.79	105.849	49.9976	152.179	1533.9	94.0404	60.7548	86.9416	288.679	133.166	134.188	9027.97	212.47	80.542	1065.85
HIT 1963	32.6803	37.2889	34.2334	34.5099	42.8234	37.5766	35.9098	35.3021	8013.27	52.5768	35.3553	35.7544	34.8136	35.4541	34.6902	49.0401	39299.2	74110	6704.73	8795.76	2100.43	16781.6	3372.73	7197.04	14301.4	2604.67	8263.1	14302.5	11020	1529.64	19222.7	31536.8
HIT 1964	32.6326	36.3264	33.4059	33.8977	35.9885	36.9806	33.5547	32.9418	32.8049	33.1865	34.4668	33.3532	33.49	33.6368	33.0819	34.673	90.7561	49.7724	48.0249	47.5891	38.2511	73.2566	46.6921	40.9759	44.1429	36.8271	40.4181	52.2169	80.8612	42.9079	56.4255	46.665
HIT 1965	32.2821	38.8601	32.7993	34.3457	36.0166	36.9986	33.3997	33.5769	33.0847	33.7905	33.4705	34.2263	33.3582	33.3291	35.1189	35.093	263.68	53.3384	70.7959	70.5174	42.1154	235.311	47.2923	43.3419	68.26	37.5077	40.5996	121.618	210.664	41.4399	51.4991	100.324
HIT 1966	43.7269	57.9038	33.432	39.0851	38.5401	39.0307	33.4272	33.5609	33.4409	34.3665	36.0211	33.4369	47.5594	33.8112	33.9697	36.7428	12377	25260.8	1668.19	1036.08	1400.67	4298.13	847.504	323.392	5017.52	767.373	5911	588.77	5874.49	954.041	6030.93	1568.61
HIT 1967	32.5987	39.3619	33.1428	34.0809	39.0593	37.704	33.204	33.2297	33.0552	34.0137	34.2949	39.0712	34.3846	32.6778	33.0721	34.9943	53.4191	42.5595	45.7039	44.1983	44.1557	48.782	43.6464	39.2875	40.5326	37.9324	38.5557	41.5934	92.4527	43.4742	55.4248	40.061
HIT 1968	32.6937	36.8029	37.3764	34.0894	39.0187	37.171	40.1266	34.5264	33.14	34.3711	34.7079	33.6057	3195.23	33.538	33.8456	36.0953	13957.2	28296.7	3077.99	3251.58	1246.25	3448.99	1994.65	1220.55	9766.34	1006.96	4811	793.318	5871.69	772.822	7865.18	2241.62
HIT 1969	32.1172	36.4207	32.9284	33.0383	39.8404	36.9932	33.4402	33.2328	33.0887	33.5063	33.4157	33.1579	33.1738	33.2162	33.2009	34.6717	44.5654	40.3519	41.6572	42.68	42.5974	41.433	39.66	39.0436	37.9762	44.5349	40.8645	36.7851	74.9888	44.6635	58.212	35.973
HIT 197	32.3263	37.5881	34.1682	34.3822	37.1352	33.8083	33.0472	32.7494	33.1377	33.4574	33.928	33.5337	33.4028	33.9341	33.9988	35.4212	49.7416	48.0561	47.2749	44.8869	50.3321	50.4196	45.9373	41.0998	41.39	39.6026	43.4117	35.5246	170.379	42.226	59.061	43.2335
HIT 1970	32.9877	39.0037	33.0328	33.7372	36.7547	38.9527	33.2313	33.361	33.1019	34.6023	33.9187	33.1585	34.329	33.4761	32.9864	35.5896	40.4371	40.0661	39.2022	40.5276	44.7491	41.8059	40.5632	40.0317	38.0021	71.4202	38.3505	35.0062	102.491	41.0998	68.7784	35.7133
HIT 1971	31.8297	38.2206	32.3184	34.0433	38.076	36.6845	33.4499	33.1303	33.0787	35.4572	33.4855	33.0436	33.9574	33.6585	33.5896	35.2263	41.371	40.2827	40.5525	41.9908	42.3706	40.3247	41.613	41.8267	37.1543	47.7528	40.5912	36.5867	69.7671	38.5594	55.7933	36.3484
HIT 1972	32.1313	37.2295	33.4763	33.8803	37.149	37.1985	34.255	33.0738	33.0409	34.6571	34.569	34.0952	34.4773	33.5369	33.729	35.0722	42.0277	41	39.6115	41.8006	40.9886	44.8462	39.661	37.6791	37.1387	36.5679	38.9157	36.1395	62.9929	43.7642	54.8439	36.5712
HIT 1973	32.4136	36.4195	33.6786	34.7634	37.1953	38.1503	33.7228	32.9796	33.3149	34.9159	35.1578	33.6928	32.6324	35.056	32.8459	36.8962	45.6673	40.7284	41.0403	43.7266	67.0979	41.4828	39.2115	39.5768	39.4083	37.532	38.9479	36.6084	58.049	43.7964	49.9463	39.3272
HIT 1974	32.0462	36.7576	33.4301	33.9546	46.7687	38.6024	33.4442	264.52	33.1726	34.2293	33.7398	33.5745	34.0842	33.6935	32.4756	35.8686	52.2583	46.6516	57.0965	63.8811	63.4896	42.5826	51.1366	68.561	37.1501	46.6968	118.929	38.2821	96.5832	71.3048	56.5991	57.107
HIT 1975	42.3238	38.156	55.8971	43.4447	238.365	37.4377	33.8167	114.343	34.0384	48.9483	51.1502	34.2095	34.2086	39.8842	33.5825	35.7211	10814.8	7607.47	174.21	250.945	15452.8	408.427	224.834	21180.4	382.283	1076.17	28803.6	179.274	2246.39	77.0617	421.062	6516.91
HIT 1976	32.2184	36.9939	33.1531	37.359	39.542	37.1631	33.6277	33.5345	34.1222	34.9593	34.8408	34.0993	34.7666	34.8956	34.7391	36.058	79.9381	69.0569	42.5229	45.0213	82.2645	43.5002	44.9894	115.683	40.9552	37.1191	133.117	38.6291	65.2692	48.2298	54.3142	56.9673
HIT 1977	32.2379	39.7688	35.3208	35.339	35.5344	38.9099	34.2294	33.1153	34.9756	34.7565	35.1274	34.4872	33.7078	33.7231	33.811	35.5671	112.074	92.3307	49.8333	43.6641	119.475	45.2527	42.9226	149.651	39.1652	43.659	181.166	36.7575	68.2408	42.4474	52.4668	55.4756
HIT 1978	31.8595	36.5846	33.1135	33.7581	37.1968	36.1122	32.8722	32.591	33.4979	34.2926	34.087	33.5668	33.2711	33.1021	33.7264	34.5505	1319.83	1210.86	41.2991	45.8925	1887	83.9227	62.3744	2731.95	53.1115	39.1387	3791.38	47.525	63.7308	41.7204	54.1279	709.517
HIT 1979	32.2177	39.1964	33.0818	33.6596	37.6413	38.3467	33.6915	98.8347	34.0888	35.6939	34.2531	34.0065	34.0899	33.8275	32.9614	35.9527	9428.19	4401.21	55.368	72.7069	12910.2	273.275	172.682	13110.1	145.439	56.9788	23979.1	93.8182	113.034	58.0032	64.4055	3370.87
HIT 198	32.6913	37.3817	34.4009	33.6793	48.6784	52.4155	34.471	34.2439	33.5028	99.5224	38.7392	34.3959	34.9823	34.8357	34.7449	36.4445	293.669	647.417	124.028	87.5351	215.266	183.106	134.536	57.5155	66.9737	135.27	135.529	74.7606	12040.2	74.3343	100.862	123.894
HIT 1980	33.9429	38.0259	33.3976	34.322	555.121	41.1313	33.5749	33.6932	33.2929	33.9274	33.6832	32.7418	33.2254	33.096	32.6505	35.6359	5699.46	4078.22	43.3818	48.1666	7962.59	176.709	123.546	11272.3	104.355	46.7318	17001	68.3213	77.4771	45.5756	60.9348	2629.45
HIT 1983	31.9106	37.2088	33.2361	32.3082	36.639	36.8295	33.3587	32.4902	32.9049	33.9843	33.5942	33.3743	33.2739	33.5373	32.7056	35.6996	54.835	49.6604	37.367	43.46	45.7173	71.2377	41.4161	43.4745	39.264	36.4475	39.6133	35.7515	130.321	43.5336	51.6776	36.9083
HIT 1987	32.225	36.6746	33.0058	36.4753	37.8137	35.9799	33.2251	32.9969	33.0808	34.0966	33.9505	33.4701	33.2708	33.324	33.9133	36.8611	43.9388	43.7619	920.397	41.4099	52.1498	1291.66	40.5074	38.0157	47.0992	37.571	40.1218	37.0111	62.8364	46.3041	1512.49	37.5158
HIT 1988	32.0121	36.3932	32.6361	33.1638	36.0471	37.2925	32.8359	33.4287	32.5272	32.634	34.17	33.0702	32.5818	33.0012	32.6792	34.9575	41.9068	39.505	144.307	38.7949	42.5276	105.354	37.9988	38.4923	37.733	36.9928	39.1666	35.673	62.5305	44.3632	233.23	36.0138
HIT 1989	32.273	36.3901	32.5026	32.8377	38.3616	38.4587	34.2197	32.4493	32.8717	33.6751	33.0512	33.7966	39.4788	33.0148	31.9846	36.02	42.392	39.4506	288.473	42.8987	45.5669	151.203	42.5138	36.8715	52.4793	36.6311	38.6712	36.1935	65.429	44.1946	508.835	36.8642
HIT 199	35.049	87.245	60.0561	10230.9	40.2534	40.7988	38.9977	48.3533	47270.3	434.026	1263.74	48.7906	36.5278	43.7407	80.0938	39.0581	133.36	57.8052	51.6681	48.6604	68.0366	62.4016	48.2716	48.7811	43.9907	37.632	48.2383	37.7209	409.002	44.6548	79.5116	57.9447
HIT 1990	32.1704	37.386	33.074	33.6407	37.6119	36.7279	33.6604	32.7481	33.0981	33.8282	34.3203	33.1179	33.3792	33.5761	33.2749	36.4083	2852.72	1739.74	3630.53	30972.9	2233.69	3980.98	1675.34	742.058	6141.96	263.026	120.71	528.663	33980.4	166.178	8260.59	145.802
HIT 1992	76.8507	55.4872	79.4347	48.1307	44.086	37.8133	98.7096	76.0438	41.2086	80.9039	52.3194	172.048	108.22	59.2448	70.5844	206.085	842.739	1340.12	3033.65	32846.3	1977	3477.79	237.036	849.413	6548.82	248.947	106.227	538.401	41080.4	190.78	9713.03	937.995
HIT 1994	32.8092	37.5474	32.8792	33.4771	38.2269	36.7378	32.8043	32.852	33.0746	33.793	33.1906	32.6635	33.305	33.6839	32.92	37.3457	8896.58	10616.9	2347.55	548.29	52.2095	270.085	1347.12	2611.15	1101.65	2869.15	1573.78	5642.5	555.45	3011.78	11027.8	22686.3
HIT 1995	32.5006	36.3676	33.8129	33.1802	37.828	36.3814	34.1413	34.0519	32.5258	35.3116	40.6234	35.5417	35.4305	35.4144	33.7537	38.1516	15152.4	17727.8	4365.49	938.466	71.7347	773.334	2958.61	5179.99	1943.9	6096.78	3222.47	7511.11	893.959	4052.68	18099.9	31797.5
HIT 1996	34.0566	38.2095	35.1843	38.6613	41.3377	40.2912	39.5828	36.1939	52.9996	44.2651	36.6378	40.3517	36.9916	36.9841	35.4257	42.8458	30223.8	32767.9	23263	4015.51	277.731	7422.52	21968.9	9737.52	4810.11	16376.3	14969.4	3485.7	9219.33	14352.6	34769.3	48153.7
HIT 1997	32.2276	37.0387	32.5586	32.9656	37.1431	37.2316	32.7175	32.8833	32.9114	32.7918	33.4518	32.7141	33.7354	32.9286	36.251	35.5644	43.0662	41.2298	39.1704	40.2082	40.3063	42.59	39.5277	40.3511	36.8584	37.2727	40.2171	36.2049	59.0543	43.378	52.9811	36.5762
HIT 1998	32.2663	37.8917	33.7103	33.3656	40.1615	40.2026	33.6025	32.4657	33.13	34.6045	33.275	33.5973	33.4284	33.2518	35.3198	34.7987	3014.03	4098.82	2045.24	429.364	58.2616	635.917	1525.48	1016.9	775.565	1820.39	1768.37	526.748	1035.84	1754.96	4225.53	7543.69
HIT 1999	32.3732	36.6256	32.9704	33.4775	36.6062	37.1776	33.2468	33.0643	33.4079	33.5462	33.556	33.5235	33.8042	34.5147	33.1615	35.885	161.365	273.942	68.6369	57.2834	59.868	820.214	5120.56	187.546	264.778	133.353	69.9136	1358.29	123.019	44.7262	161.651	377.726
HIT 2	32.3967	37.1644	33.166	33.4712	37.3362	36.1806	33.0353	44.7844	33.9045	34.4937	34.058	33.9599	33.6159	33.4958	33.8303	35.0566	49.2458	52.0797	44.9269	45.2375	42.9406	52.1532	51.0152	41.6113	38.648	36.0962	45.697	36.44	64.7282	44.5641	54.0081	38.7208
HIT 20	32.3561	38.0693	33.8429	33.6022	36.9362	37.6113	34.2566	32.7629	32.0524	33.2881	33.4563	32.3606	33.8751	33.575	32.9925	36.1566	41.2765	42.0187	39.88	41.5628	37.0919	41.1159	41.4229	39.0121	37.0357	36.2766	41.4307	35.2898	57.1654	41.7548	52.6603	36.4486
HIT 200	32.1252	37.8696	32.7391	35.7369	36.9977	37.5669	33.3841	34.1363	66.1782	34.2893	33.9065	33.066	33.2604	33.4964	33.5793	35.6689	46.8908	45.7167	41.032	42.4696	41.1719	43.1762	41.9204	39.3219	38.3925	37.0845	38.8506	36.1863	59.9487	42.2327	52.5993	36.943
HIT 2000	31.6235	37.4604	32.464	34.4091	36.4665	38.0169	35.1181	33.0861	33.5548	34.6417	33.6693	33.6209	34.4609	33.9627	35.0261	37.0244	841.297	799.195	167.924	161.008	78.4125	817.292	3758.46	538.869	360.745	445.23	134.147	1852.99	468.397	48.3061	218.264	846.344
HIT 2001	31.7934	35.3213	32.76	34.2778	35.9631	36.8413	33.5439	32.5442	33.2568	33.7011	33.044	33.4495	33.3207	34.1867	32.9399	34.59	12830.4	10442.9	1774.66	1805.03	284.912	5089.02	7932.81	7456.58	3045.22	7140.18	1355.53	16090.4	3316.22	135.536	1651.14	8365.54
HIT 2002	61.0485	176.412	132.261	61.6294	96.0369	42.75	51.4509	35.6859	174.351	43.8538	42.7324	40.8668	53.3685	35.4252	35.6166	46.3228	20506.8	28679.2	83123.2	10498.5	2920.22	15329.7	36962.5	27598.6	7987.8	23172.7	60015.4	16948	26329	8639.73	22930.4	28933.5
HIT 2003	32.0463	36.0431	32.2993	33.3192	38.729	36.7085	33.2765	32.2841	32.4278	33.2041	33.8275	32.4151	32.9058	33.1938	32.13	34.4801	50.6858	43.5986	46.003	41.6709	40.7404	51.5333	58.7581	50.5304	43.3543	45.4683	41.182	45.237	64.7822	50.802	53.9479	67.8031
HIT 2004	32.7762	43.3492	41.3088	34.5597	46.7359	48.8973	35.9202	34.6031	33.2099	34.2179	34.7964	33.624	61.3682	33.2741	33.9835	35.5651	3983.27	2529.21	3860.91	1364.86	467.558	4584.87	10017.7	5738.54	3211.61	3844.12	2439.84	5649.69	147.497	1428.1	2175.6	18499.8
HIT 2005	31.9503	37.4924	32.8405	33.2968	41.1525	46.3732	33.304	32.8058	32.8555	36.068	33.9826	33.1512	33.5952	34.0244	33.8385	35.8121	44.553	43.2743	40.0642	42.8133	42.2912	40.4381	37.6126	42.1748	37.3836	38.1028	38.5718	35.8184	57.9	42.0161	51.9418	37.6339
HIT 2006	31.9804	36.7338	33.9856	33.4947	37.6378	38.2882	34.1695	32.8474	32.6893	34.0859	33.9012	35.5259	34.6954	33.695	34.3316	37.2957	50.4701	39.6539	40.963	39.692	42.4781	40.2696	38.3991	40.1092	38.038	35.9967	38.0846	36.0628	58.5303	40.8887	48.8413	37.1406
HIT 2007	32.284	41.8668	33.0716	34.1854	38.5711	37.5377	34.2927	33.2228	34.4555	33.993	33.1485	34.4461	33.185	33.4896	32.9203	34.5982	46.0774	43.6396	38.8841	39.5924	39.9315	38.7274	38.7613	40.4797	38.2565	36.6698	37.3622	34.9673	59.9704	41.5985	53.4544	36.7151
HIT 2008	32.1837	35.7777	32.9517	36.8297	36.7713	35.9106	67.8739	38.5096	35.4661	41.3747	38.3034	37.7263	37.5723	42.4902	37.5524	37.5831	46.6786	40.6216	41.1083	41.289	42.8623	41.9326	42.1801	41.0423	36.9991	36.7939	38.1934	36.5977	63.7638	43.8708	54.9929	35.7183
HIT 2009	32.3454	37.6595	33.7004	33.6559	37.3449	36.4921	32.9171	33.087	32.9625	33.2345	34.2609	34.2225	32.9924	32.1094	32.711	34.7718	45.7504	41.8145	42.7568	43.4044	41.9625	41.2153	39.4908	41.3838	38.9832	36.8362	37.0672	35.8982	55.5811	43.2157	45.6154	35.142
HIT 201	32.2558	37.1074	33.5589	41.0279	36.6333	37.0864	33.8375	32.904	6155.22	64.1878	36.1696	33.2817	33.6075	33.4327	37.5307	37.4263	44.6162	41.7617	41.1933	41.7102	43.5674	41.7506	41.7225	41.1134	38.0708	36.5733	39.6625	36.0043	130.39	41.5421	50.4368	38.3181
HIT 2010	31.9987	35.3841	33.8746	39.298	37.1263	37.1234	33.0588	32.837	33.5838	38.0144	43.7392	33.584	33.0145	35.8289	33.4866	36.4426	45.9079	37.75	42.7637	42.8892	41.7733	40.5919	40.5441	41.6153	40.4121	37.4296	40.3597	45.7395	64.1858	49.3172	58.7914	40.0007
HIT 2011	32.9499	40.1777	34.1388	34.8784	37.6036	37.8149	39.4434	33.7693	55.7914	36.7163	34.7532	35.4781	34.87	35.0396	34.3819	37.502	2852.87	90704.1	616.354	948.905	382.611	7835.79	129.454	134.473	2519.52	35487.2	300.601	2583.32	136.411	131.8	62601.1	271.237
HIT 2012	31.8285	36.5938	33.339	33.6477	37.2779	37.6706	33.5134	32.6581	32.7157	33.6608	34.025	33.024	33.911	33.417	33.3605	35.4299	215.706	2169.46	95.3592	68.7429	57.01	133.001	40.7998	40.736	244.658	501.529	45.8126	196.885	72.6542	44.3654	346.074	39.0383
HIT 2016	45.2915	61.0401	78.1672	40.8735	66.2961	38.3674	62.0874	46.6417	34.4298	38.2798	37.6945	50.4794	17271.2	35.3331	38.3329	57.5668	11107.1	24464.7	5027.81	9224.34	3528.78	6712.7	10122.6	5509.26	23129	13304.3	4351.34	5525.09	3557.51	1399.15	15367	13305.7
HIT 2017	33.7965	39.3849	37.0359	35.1292	36.886	38.8006	34.8151	38.0182	34.3492	39.138	37.2386	39.8618	35.8832	38.4329	36.2933	43.0379	233.472	499.179	72.5145	74.1305	102.869	104.733	375.732	67.5446	80.5238	42.3094	297.153	43.3891	144.216	42.1367	70.6972	52.9462
HIT 2018	31.5545	37.492	33.9046	34.2986	37.9348	35.5611	34.0194	32.8332	33.0107	34.0779	33.261	33.8013	33.5063	33.4501	33.1792	36.7636	45.2956	39.3606	43.0154	41.8482	43.62	43.015	41.8804	43.8931	37.1363	37.1807	38.1155	36.0544	68.3643	42.5672	52.8268	35.8644
HIT 2019	33.1459	37.8064	33.9995	34.9504	37.8954	37.9874	34.5098	32.8362	33.0926	35.4927	34.8556	34.6834	36.5771	42.4216	33.8432	38.0336	279.003	1576.72	86.6192	72.6907	83.9116	153.672	435.203	75.0469	92.0112	39.1688	150.237	49.0133	145.733	48.3248	75.7094	53.676
HIT 202	32.4142	37.7318	33.6062	34.4066	37.5298	37.9406	34.0729	33.6599	36.9202	34.7327	34.6255	34.4621	33.7206	34.0049	33.4486	38.0501	157.874	191.578	78.2421	100.553	161.252	349.162	258.92	73.1868	52.9736	79.5889	186.406	51.7591	461.21	64.8562	149.412	91.7006
HIT 2020	35.2762	38.4483	33.3256	35.9718	48.9794	37.3437	34.0133	32.8551	33.3178	34.4948	33.6814	33.6758	33.9921	33.811	33.0208	35.769	8345.54	56645.7	1300.7	95.1216	2049.46	2363.45	55.1176	274.989	1847.09	4278.74	27909	305.641	1057.74	125.366	336.165	268.289
HIT 2021	31.9354	37.2719	32.9297	34.3524	35.2914	37.7482	33.7748	32.5866	32.9674	33.9397	34.8745	32.303	33.2323	33.1907	32.9794	34.1803	148.693	422.655	42.7864	40.8904	47.3937	89.2264	42.1751	44.1651	44.539	37.3383	39.9411	36.3866	64.7242	44.6095	54.6427	37.8094
HIT 2022	39.5358	37.7807	36.5765	35.7449	41.6565	37.5009	34.7182	32.7732	32.6789	33.7779	34.0945	34.1651	33.8708	33.2241	33.8915	36.2563	2908.08	16637.6	473.338	65.3021	666.424	694.74	44.0173	138.58	618.796	1795.77	12088.9	164.676	460.918	78.0479	155.456	122.928
HIT 2023	32.6621	37.602	34.1995	34.6423	43.2585	37.3955	35.8069	36.1756	3792.39	46.1023	35.5782	36.873	35.7289	35.8415	34.4605	48.6225	15325.4	17038.5	7976.55	5285.96	3688.96	3897.72	4919.76	6317.1	4331.29	2348.21	10672.1	10068.7	1638.13	3586.79	9587.9	10025.9
HIT 2024	32.2792	37.022	32.8078	33.1448	37.9808	35.7205	33.5922	32.7146	33.6629	33.2769	33.6756	33.8369	33.3129	32.955	32.8558	37.2387	99.4525	74.6971	52.1276	43.8765	114.747	47.7362	109.01	39.7872	41.7985	42.4376	44.1408	74.3126	62.6292	47.754	74.6693	50.9282
HIT 2025	32.1141	37.979	32.8349	34.1312	39.2087	37.1256	33.3881	32.944	33.0052	33.7472	34.6399	33.1139	34.187	34.6343	33.0222	36.5432	221.215	294.992	47.9286	60.8894	135.973	48.1655	132.437	48.9763	52.5658	47.9242	45.4048	82.8869	64.3862	49.8892	84.249	56.4254
HIT 2026	34.9734	44.9784	37.1949	33.6921	43.7165	40.6122	36.188	36.1067	36.2392	35.6896	34.9927	36.2387	49.5246	36.8112	34.3173	40.9577	6404.87	723.372	1492.46	288.04	4690.56	954.553	6303.22	441.674	481.002	536.04	265.585	1174.33	165.102	840.956	4113.78	4141.97
HIT 2027	32.5267	37.2316	33.8113	33.7953	37.4617	38.0089	34.4891	33.2389	34.1266	33.6325	36.6016	33.9175	33.8559	37.0474	33.626	35.8126	193.77	60.1118	116.364	75.9748	230.973	217.656	167.674	42.2926	74.6167	40.3332	39.9953	111.778	308.609	58.9912	74.4952	128.382
HIT 2028	33.9472	48.5754	44.1393	34.3175	64.7251	40.5681	37.5055	33.6104	33.6566	34.7382	34.4131	35.7448	44.4467	35.2133	33.9505	36.9304	873.931	3223.71	431.671	308.461	1502.37	910.848	1113.33	145.818	213.645	483.152	342.408	464.122	206.698	273.206	345.965	382.08
HIT 2029	33.2708	41.6849	34.5086	40.3233	42.2279	39.66	38.8363	37.5957	38.4438	49.5915	45.3601	43.2928	36.9507	41.2048	37.3492	57.1341	3827.33	87.6871	206.76	907.56	496.59	200.414	59.5978	3892.54	108.664	52.0988	716.505	93.2241	80.5906	56.925	72.9507	106.928
HIT 203	32.3688	43.0936	33.9819	34.5793	46.8503	40.6237	34.0868	33.2466	34.3721	35.5294	35.4673	34.8361	34.2601	34.9592	33.8843	36.4408	111.362	55.5657	71.1911	63.8916	143.537	86.7336	47.6441	65.2824	39.3721	366.599	676.915	38.7389	57.1898	103.346	244.046	77.2477
HIT 2030	32.6672	36.4201	32.7263	33.3939	39.2595	38.3128	33.4658	32.791	32.5798	33.7043	34.067	33.4105	33.2944	33.7485	32.6607	35.7571	54.8135	45.9532	49.3537	43.2199	39.7843	41.7076	38.9927	50.2935	39.4421	38.3751	40.5926	38.2352	64.1891	45.8952	53.359	38.3831
HIT 2031	32.6368	36.3504	33.0665	34.0014	38.7031	38.0928	33.7332	32.958	33.6756	33.8756	33.8511	32.8058	33.5795	33.9413	33.0279	34.5344	2104.14	61.1051	120.862	454.157	340.527	111.008	44.9262	1507.21	77.84	47.6179	1447.97	62.4418	78.1969	42.7331	65.8104	177.082
HIT 2032	32.4311	37.3786	33.4829	33.8989	37.2759	37.7486	33.7098	32.9971	33.005	34.0868	34.4624	33.3865	33.3075	33.2695	32.5947	36.0206	47.9914	39.788	41.1957	39.9638	38.7528	73.2679	41.725	43.1466	37.4883	33.7085	40.7387	42.1739	57.131	42.114	55.617	35.8244
HIT 2033	33.1529	35.8695	33.2076	33.4412	36.7885	38.8012	33.3026	32.652	32.3743	33.4518	34.4107	33.27	32.8488	34.3067	34.2847	35.139	61.3358	38.357	37.5517	38.624	39.0559	51.7841	40.8658	50.6323	36.6657	37.1279	59.1977	38.9445	61.0407	42.4628	51.9048	36.371
HIT 2034	32.2143	37.2828	33.5993	35.1187	45.5965	37.9811	34.8209	54.5402	33.2195	34.2129	36.2659	33.1887	33.8388	34.8249	33.4319	35.9573	446.859	51.4719	49.6103	95.3602	129.604	51.7522	41.1148	318.695	54.603	43.0354	69.3251	40.3538	76.1994	57.6322	64.4262	64.112
HIT 2038	32.5009	39.7849	33.1143	34.0308	38.6131	37.4791	34.385	32.6571	32.9386	34.3686	34.9702	33.7935	33.7577	34.303	34.1413	37.549	44.5704	40.0888	41.5605	40.9228	40.3023	42.6822	50.824	67.2089	38.6282	37.514	41.206	39.185	57.4321	42.0496	54.1769	36.1842
HIT 204	32.2672	41.1664	33.4374	33.7489	37.9468	37.9637	34.949	32.6498	655.21	37.3823	36.8911	33.9086	33.7944	33.535	55.6091	35.3563	46.7629	44.0628	41.1746	40.7673	44.0392	39.817	38.0524	38.0203	38.889	43.2273	43.5196	35.4	225.142	41.132	49.9656	39.8871
HIT 2041	32.6781	38.793	34.3102	34.317	41.1984	39.0104	35.6268	36.0775	4235.81	46.0416	36.0499	35.7236	35.5299	36.3789	34.7242	49.6094	4264.01	4375.98	1174.82	1709.12	218.578	1398.27	998.172	1458.91	1600.43	653.088	330.811	2187.76	16003.1	976.65	1464.91	6007.17
HIT 2042	32.8222	58.491	45.5323	39.8752	46.2382	37.6785	36.9563	38.476	36.2285	41.1186	39.6424	34.9077	36.0663	41.0484	36.7649	37.3212	65.9818	43.9438	41.28	53.3598	53.0079	132.685	40.2624	40.3617	40.7	43.6344	42.2527	37.2861	3261.09	56.5288	62.3706	37.6882
HIT 2043	32.2272	36.8666	32.8666	33.6319	37.1978	36.6793	33.7041	32.3486	32.3665	33.3096	33.8434	33.7867	33.5871	32.8621	32.9342	35.3756	45.3687	43.6959	40.8993	40.1203	41.073	40.7816	43.9939	38.0445	37.7961	38.6339	40.0716	36.9579	682.202	42.7086	54.4532	35.3231
HIT 2044	32.9459	38.5127	33.7559	34.1609	38.3435	39.8832	34.4774	33.4637	39.3994	34.0919	34.5814	34.2564	33.5591	34.3574	34.5017	36.5601	13801.1	13069.8	8721.57	1409.3	151.12	3525.51	9211.2	4560.07	2347.48	7968.55	6659.91	1559.25	9560.3	6551.51	16100.3	27119.4
HIT 2045	32.0762	37.3145	33.9531	34.3267	45.9722	40.0386	33.2908	32.2667	33.2652	33.6549	33.8081	33.048	32.8965	33.6057	32.6522	34.5368	77.0396	441.396	66.5385	44.2567	69.423	130.733	49.4288	48.2616	38.7222	44.3939	56.3296	36.2653	609.798	54.923	57.1077	43.1426
HIT 2046	32.2739	41.4516	35.4067	52.8518	38.0198	37.3374	201.349	98.1183	44.4711	99.0587	57.7098	57.8399	71.8745	96.9855	70.6393	38.6498	75.0334	63.6365	81.921	50.3576	55.7009	89.2627	61.3991	113.983	43.4384	47.4423	54.0207	42.524	965.773	53.9611	59.812	52.6317
HIT 2047	33.0775	39.5894	35.4123	33.9478	39.7373	37.7064	34.7327	35.6924	6730.38	50.9682	35.5807	36.6944	35.4096	35.9829	34.4447	43.5463	15390.3	6655.09	1665.4	7470.67	402.595	3144.51	1313.78	2425.26	2036.62	3294.24	468.377	3820.47	792.06	905.11	1412.56	9206.09
HIT 2048	32.614	46.7597	36.4769	43.1562	36.8159	38.8598	77.5192	38.6646	37.3845	45.3907	39.5168	41.5067	51.8312	42.9676	40.7016	37.6737	5346.03	64.1136	58.173	3536.25	74.1662	956.097	47.1489	54.1651	41.8916	1837.26	49.1427	36.4105	125.444	47.0299	52.4832	39.6539
HIT 2049	32.0707	36.0142	33.4201	33.2266	36.6109	37.0542	33.8668	32.4954	50.1718	33.5269	33.874	33.134	32.8318	33.3726	32.8726	34.3105	7378.41	80.7295	54.8382	2805.7	889.624	808.607	43.572	47.1782	44.9072	1519.03	53.0932	37.0789	65.1607	45.0181	51.6509	41.3766
HIT 205	33.4366	37.3694	33.9286	34.6057	40.2964	40.148	34.8112	35.4153	324.444	38.6588	35.0302	33.723	34.6066	41.9941	35.0444	41.5995	343.861	291.473	139.552	110.297	56.5697	163.022	96.7434	183.929	107.188	83.4684	75.1878	138.572	88.658	93.8421	306.871	277.657
HIT 2050	34.3869	41.1941	34.9886	35.1507	38.903	40.1376	36.146	34.5672	35.1314	36.977	35.6824	35.9537	34.8642	35.7742	34.3907	38.3255	1092.27	486.274	258.609	748.789	69.4333	243.495	72.0602	54.3277	51.7407	158.052	86.4274	59.8705	119.688	52.7951	65.5399	73.3204
HIT 2051	32.4115	36.0472	32.7081	33.7774	37.3696	36.4158	33.952	32.7696	33.2143	33.4733	34.0054	33.257	33.3437	33.7426	33.0394	34.9408	221.738	42.0189	41.1956	168.381	41.0778	76.4996	41.3009	39.1264	98.4399	133.918	40.0872	37.275	64.2723	43.4138	53.3254	36.7797
HIT 2052	32.2112	37.5751	33.6753	34.7404	38.9811	39.9501	35.7636	33.1985	111.445	35.5516	34.1281	34.1433	33.7987	34.2447	34.0038	35.6137	685.583	283.3	402.236	701.545	279.533	212.613	251.6	110.79	333.182	382.01	351.78	117.9	483.658	56.6015	293.658	117.746
HIT 2053	32.67	38.6089	35.8047	36.5358	55.6822	38.8363	34.8756	33.9545	248.18	41.1588	37.7033	36.1762	34.5713	36.2575	33.6218	84.2656	85632.3	116045	76379	18575.7	4108.2	5288.85	36085.4	120760	19080.9	119110	35541.5	109551	32500.1	94293.1	80800.6	128374
HIT 2054	32.0456	37.7041	33.3421	32.4357	39.9011	39.8302	33.2231	32.3188	32.76	33.4416	35.8064	33.3932	33.3045	33.1945	33.0412	35.2971	4851.91	2580.83	461.761	87.6932	48.8639	63.1446	779.244	7393.19	235.787	799.616	339.232	1351.75	236.629	788.064	706.383	2816.42
HIT 2055	32.213	37.2881	33.0833	34.4384	36.8667	37.8525	33.2239	32.925	33.2418	33.6263	33.8681	33.7953	33.099	33.3035	33.1445	35.8824	806.403	543.648	157.461	61.1316	48.4284	53.0164	192.269	1037.04	100.453	324.772	158.693	608.311	121.484	261.601	298.015	771.759
HIT 2056	33.6281	44.2886	36.3165	36.2002	74.8893	113.764	37.8873	34.7735	485.119	40.6527	34.5443	36.5752	38.7158	34.9375	33.4451	40.0035	50738.9	19365.9	16994.8	2881.26	758.053	1292.39	15369.2	40908.9	9351.73	22332.6	7356.79	7990.82	8106.97	23638.8	12529.5	36174.8
HIT 2057	32.4501	37.7256	33.4006	33.575	37.5941	37.3429	33.479	32.8552	33.2471	33.5983	33.9329	33.1125	33.1124	33.009	33.114	36.5097	61.723	53.5915	48.5291	42.3258	41.4378	41.6115	47.2687	74.9133	40.3503	47.6972	42.7836	40.6429	63.4138	48.0184	54.3595	47.0728
HIT 2058	37.6475	54.2102	57.547	50.9842	61.2302	78.4468	204.197	113.952	50.9598	133.441	64.8186	195.836	416.251	95.131	80.1444	225.638	14620.6	7400	6620.54	1589.75	333.086	1961.46	6041.28	25055.1	3385.5	10473.6	2371.86	4465.84	2422.59	7364.22	3813.92	15023.1
HIT 2059	33.8662	38.6675	34.9588	34.9208	37.6231	38.5306	36.8048	33.5733	34.6716	35.0138	36.4695	34.9705	39.6012	34.5502	34.3598	36.0481	47.941	43.8178	43.3185	43.2527	42.6092	41.9722	41.7016	41.2163	37.6841	38.8375	41.3601	38.4709	59.8158	43.9183	52.3178	39.0283
HIT 206	32.3672	36.6269	32.7762	33.8818	36.836	37.0034	33.0311	33.0126	33.8019	33.052	33.469	33.7189	34.6677	32.5949	32.5443	35.1907	53.5017	58.8061	169.622	116.22	124.435	56.1693	105.448	119.692	42.6279	135.227	625.244	43.9215	59.0187	76.8272	241.932	201.46
HIT 2060	32.2358	37.812	33.4911	33.5043	37.1485	36.1104	33.875	32.8999	33.4074	34.3269	33.3875	34.1004	33.147	33.6966	33.6951	36.0559	512.739	290.472	808.543	52.6722	104.88	113.267	101.573	63.2496	50.6996	106.656	166.468	60.1073	71.0041	211.341	88.8894	68.2178
HIT 2061	32.4269	36.7267	33.6241	34.1577	37.2616	36.7096	33.2499	32.6722	34.1202	33.3622	33.3349	32.9018	32.6942	33.2924	32.8208	34.4158	1095.67	542.133	41.9197	41.4456	75.3798	46.2227	113.131	74.3351	59.7917	135.73	38.5459	61.8367	61.153	309.337	51.692	35.3802
HIT 2062	33.0432	37.5608	33.1433	33.72	37.8853	37.3249	33.6733	32.1954	33.13	33.2824	33.7608	33.0601	34.3819	33.0004	32.7221	36.3678	1471.12	1534.39	569.228	99.2242	250.804	198.497	786.394	794.062	246.881	586.864	161.271	110.006	11934.2	308.582	875.237	150.714
HIT 2063	32.1628	37.4903	32.9017	34.053	38.0223	38.4231	33.3976	32.7869	33.0375	33.2899	34.1054	33.3553	33.6267	33.7476	33.4422	35.8654	234.333	139.334	39.6457	41.441	58.2604	43.8419	71.9999	49.6449	38.3945	60.2434	39.9876	39.0418	60.9312	102.767	53.7383	36.3948
HIT 2064	62.9568	74.7401	123.916	41.4626	86.1024	39.9345	77.5624	73.4583	37.3497	55.312	40.7129	123.555	29911.5	41.9843	53.6359	137.546	5196.13	6092.51	4268.04	10939.5	5186.01	1117.16	14741.8	1504.99	31807.7	3456.93	498.192	2534.44	445.494	704.076	3360.17	1331.31
HIT 2065	35.2749	110.804	41.9958	38.3014	51.3644	62.6641	37.7105	37.803	38.7397	48.3043	38.2092	43.636	39.5594	39.0339	37.1489	45.661	77.2379	63.1055	59.6715	54.4132	56.2524	60.7406	59.2801	57.3041	45.1316	43.6542	41.9149	40.4033	72.4576	45.4039	53.5307	42.3792
HIT 2066	32.6451	39.3332	33.4945	33.2448	36.8322	37.6768	33.7752	32.9538	33.8002	34.4032	33.326	33.5901	34.7059	33.8656	33.5948	35.8623	51.696	47.8747	80.0939	67.0809	59.1954	49.3237	57.1615	104.041	40.5307	100.929	125.412	38.9972	62.798	99.8724	200.697	130.866
HIT 2067	32.7468	40.1089	33.6352	35.0143	36.6139	40.4332	39.8447	36.6148	34.9491	43.8275	38.0454	38.86	36.3521	38.8947	36.1733	39.9213	49.8149	44.7534	51.5035	43.8849	42.6314	56.8348	51.0465	44.3946	43.7992	37.8567	38.9402	37.7154	60.4299	42.6034	53.7761	38.1818
HIT 2068	32.9737	50.3263	34.4363	35.1468	39.9908	40.0335	35.4534	33.9592	34.5221	36.0674	35.4105	34.1118	34.3042	35.9416	34.2086	37.9301	636.647	70.6854	361.944	351.553	1185.27	2663.02	467.001	133.185	75.5006	214.143	123.167	41.9559	3890.5	105.631	174.086	86.8967
HIT 2069	38.3455	51.455	34.846	34.5864	39.1533	37.4939	35.1914	33.3872	33.3006	36.1555	34.3132	34.6317	33.6571	34.1565	33.6109	36.4699	2905.39	3460.02	6294.33	81267.3	4312.17	7464.6	909.406	1946.42	15549.6	622.5	120.086	1188.11	82751.3	448.984	18945.8	698.159
HIT 207	32.1383	37.1662	33.1448	34.0334	35.8882	38.6385	33.9943	33.3612	33.2482	33.8278	35.3305	34.8727	33.7778	35.1872	32.8952	34.0887	42.26	38.0057	41.3007	39.76	40.8023	38.5016	41.0351	38.0901	38.8006	35.5685	45.6096	37.1674	63.3711	41.3251	779.619	36.1378
HIT 2070	31.9572	37.5734	32.7453	33.6384	37.8969	37.0422	34.0741	32.698	33.4586	34.0753	33.6139	32.8223	33.5254	33.5171	33.2578	35.7459	111.13	38.8179	40.8475	41.5138	175.199	712.983	43.4911	40.8539	40.222	36.7586	39.3695	36.6464	72.9282	44.2013	56.1322	37.1146
HIT 2077	32.4293	36.3192	33.2526	33.395	37.2149	37.2421	32.5441	33.2747	33.4948	33.8333	34.2929	33.491	32.6946	33.2382	32.6217	35.0512	45.7152	41.2733	39.0853	42.5114	43.9321	44.01	41.8985	37.5928	37.6276	37.4543	38.9797	36.1274	849.376	42.9281	50.3067	36.1353
HIT 2078	31.7679	35.479	33.5193	33.0712	37.7944	37.4041	33.6961	32.8367	33.179	34.2948	34.1046	32.949	33.3689	33.2423	32.9326	35.4642	43.8289	38.843	38.2733	42.2007	42.7758	41.7534	40.0036	38.748	37.2628	36.1401	38.3649	34.9321	60.5279	42.032	50.663	36.6512
HIT 2079	32.1057	35.5326	32.5901	34.292	36.8498	35.5808	33.0633	33.1305	33.535	33.5347	33.5036	33.1891	33.2604	33.747	32.9543	35.0335	43.179	39.2242	40.7965	39.1858	38.4743	40.5837	39.5064	37.6442	37.661	35.3876	38.3043	35.0809	63.0166	41.0072	50.0929	35.822
HIT 208	32.6157	40.6453	33.3807	33.3367	39.096	40.3829	32.702	33.4821	34.754	32.5626	34.4462	33.423	32.4209	33.5385	33.2852	36.5658	49.3222	45.4326	49.1449	44.3992	43.6643	43.2774	54.6481	49.7307	43.4407	47.7859	43.7187	37.4645	57.3917	45.947	62.8791	44.837
HIT 2080	34.2042	292.801	37.3395	35.8179	38.5076	39.9531	35.8229	33.8895	37.8303	38.5416	34.3748	36.14	34.0119	34.9455	35.9629	37.1216	55.205	40.975	45.0509	41.2242	138.103	45.1444	46.0181	41.355	36.0222	39.547	36.5803	36.9293	157.239	44.5271	57.9163	36.5822
HIT 2081	32.285	39.5077	33.8137	33.1316	37.1125	38.7361	32.7295	32.7248	32.6271	33.9615	33.5342	33.4418	33.3807	33.742	33.1559	36.0003	42.3481	41.5896	44.3207	40.8719	39.101	41.5883	37.6256	40.3344	35.8965	36.5437	38.4838	35.7523	60.4273	40.9863	48.8809	36.4567
HIT 2082	32.6642	36.5624	32.8115	33.9789	37.714	37.2409	33.725	32.793	36.179	34.6503	34.1373	33.4294	33.4217	33.7569	33.4667	35.0547	46.3994	41.7699	43.9469	41.6976	541.684	45.5755	41.3112	40.0782	37.6781	39.8274	40.0252	36.8075	12231.1	50.1787	58.1187	35.7458
HIT 2083	32.4747	37.2758	33.4375	33.7559	37.4454	36.8848	34.159	34.364	1273.03	38.151	34.7406	34.4895	34.2912	34.136	34.4923	37.2823	2158.72	362.061	259.736	77.6177	68.7049	307.335	756.741	36826.1	260.881	163.902	55.8449	316.523	114.854	397.51	183.944	1378.25
HIT 2084	31.9126	36.4649	33.2423	34.452	36.3067	37.1611	35.0794	32.765	33.523	33.2224	35.1308	33.6377	34.8336	34.2682	34.5635	34.9127	41.4299	37.2154	39.0198	39.7171	42.0033	39.9698	42.3759	39.3082	37.3989	36.3078	39.6776	36.071	60.5674	41.4765	53.9889	35.7361
HIT 2085	32.7719	39.4564	33.4661	34.0744	38.4117	37.5954	33.2042	33.0263	33.7653	34.3044	35.1431	34.0671	32.8965	35.1544	33.6685	34.9943	42.5646	47.337	40.6485	41.6796	38.7418	316.114	39.6199	38.0864	36.6439	36.2105	39.389	38.5064	68.2012	44.6637	57.4364	36.2955
HIT 2092	32.4497	36.8422	32.581	34.3252	38.6769	35.6903	33.894	33.4408	35.0143	34.886	34.3508	33.0869	32.7642	33.3357	33.8284	36.6487	61.6802	48.914	41.1164	46.4766	51.0175	41.6869	43.0314	46.5269	38.607	39.2695	41.8613	37.2688	67.3798	44.1449	48.6134	40.6991
HIT 2093	32.2128	36.9606	33.2526	34.0878	38.0237	36.3204	33.7376	32.2331	33.29	34.4889	33.5243	33.5143	32.9263	33.2093	33.0895	35.1497	41.3938	37.3101	42.0475	40.3245	91.1017	40.314	40.6602	39.2374	38.178	36.9677	41.6859	37.3247	2149.67	44.9608	51.1275	48.0857
HIT 2094	32.3999	39.0399	33.7766	34.6378	37.6859	39.0825	34.6626	33.7055	34.0256	34.9916	34.8244	33.6663	33.3257	34.4595	33.2948	35.6507	44.5027	44.4868	41.6051	41.8691	482.896	60.3077	40.9688	47.8462	39.5259	38.3568	39.3262	36.5472	13661	51.0395	68.5535	366.936
HIT 2095	32.7932	37.8128	32.7424	33.8689	38.7335	36.9298	33.0605	32.6748	32.9738	33.9207	33.6161	33.501	35.8796	33.2479	32.9194	35.9298	54.466	50.8573	41.9561	42.9221	52.7071	52.9165	51.6734	41.7259	38.1785	36.762	38.1821	35.3932	66.4736	44.2357	52.2788	37.8866
HIT 2096	31.9908	35.7711	33.2026	34.1233	37.2837	36.855	33.0879	33.2394	33.5205	34.2856	33.9043	33.5537	33.5929	33.7725	34.823	34.5635	42.7723	42.6239	39.8102	41.8447	37.1127	39.7643	39.2382	42.2483	37.9341	39.5815	40.076	38.3784	58.5931	44.1475	59.3209	38.8323
HIT 2097	31.8972	36.151	33.0576	32.6696	35.8076	38.3252	32.996	32.8326	33.3905	33.3412	33.8108	32.5852	33.3057	32.5648	33.4337	34.9191	42.2666	46.5175	38.5032	40.3425	39.7906	38.7915	41.6831	37.9875	37.9791	36.5693	38.8014	36.1426	60.702	45.0847	58.4238	36.0519
HIT 2098	42.5102	55.0813	33.4585	38.8936	38.8306	38.5913	34.0739	33.3279	33.5534	34.053	35.2287	33.7207	47.6063	33.6048	33.0252	36.8017	10873.5	22407.5	1571.92	927.131	1243.03	3812.27	772.343	291.554	4452.89	733.153	5316.89	563.549	5167.25	891.638	5129.21	1443.04
HIT 2099	31.8589	37.1499	32.9737	32.8833	37.0587	37.9661	33.2483	33.6171	33.387	33.6354	33.1254	33.4905	31.7997	33.3814	33.2787	35.2396	53.4537	68.615	40.0673	41.9534	44.4923	65.0799	53.7599	42.1745	42.1544	36.5852	40.0966	37.2407	58.2519	42.4621	53.246	42.8971
HIT 21	32.8243	36.5814	33.0398	35.0103	46.2644	39.4782	36.1804	33.2759	33.3816	34.8341	33.9739	33.0886	34.2418	33.5369	33.828	37.0672	70.5405	46.0665	40.7542	43.8816	60.7401	41.6641	45.3023	55.7856	40.2802	50.5922	83.8346	36.6386	66.5317	43.3488	53.4872	56.0855
HIT 210	34.0069	36.5692	33.6924	36.395	36.1849	36.6572	54.1811	38.6682	34.2149	40.3074	36.1882	35.5041	37.5105	39.8322	38.2829	34.8717	59.9967	47.6142	58.0313	45.4204	42.7592	42.6173	45.9673	66.7717	38.6587	43.611	43.876	38.3291	62.7604	48.4906	66.5274	41.9513
HIT 2100	35.875	42.9397	40.0075	35.5348	43.3289	38.4824	43.8305	35.2895	33.4589	34.7497	34.4652	35.8215	4054.32	33.8587	34.1872	38.4015	11664	21728.7	3286.49	3673.93	1576.19	8105.15	4909.19	5708.94	9204.87	6561.62	3795.61	4378.33	4586.16	1113.04	9943.47	15409.1
HIT 2101	32.9229	37.5999	33.6132	33.2416	38.1773	38.9006	33.7554	32.4205	33.7376	33.252	33.6173	33.1725	33.1947	33.0254	32.9294	35.9083	51.968	50.3379	46.8353	43.0319	43.1791	42.6834	43.5051	42.7559	38.551	37.0712	39.0976	39.1007	61.7975	43.2432	53.2238	37.3896
HIT 2102	32.619	37.6077	33.6991	34.0949	37.1202	36.8389	34.1692	32.6184	33.0621	34.4754	33.916	33.7177	32.9293	33.3206	33.4961	35.8953	141.964	81.4421	44.0453	40.6504	42.7143	43.7773	53.6093	96.2308	46.4759	61.6187	54.8768	104.206	61.6698	94.1507	124.461	70.8084
HIT 2103	31.91	37.4259	33.7208	34.1291	37.4207	36.3284	35.3374	32.9234	33.0143	32.666	35.222	33.8177	33.071	34.2776	35.1051	36.4927	1435.15	350.426	84.643	36.6153	67.5401	70.8398	220.094	936.449	241.367	216.521	242.125	1310.54	68.0022	42.2504	1289.52	806.089
HIT 2104	32.4129	37.9756	33.9951	33.7069	38.0426	37.791	37.3624	34.9572	33.8642	33.7896	33.6403	33.8381	520.732	33.3094	32.9447	35.953	4287.8	9375.99	12853.4	17759.2	535.2	11135.1	12919.5	8369	3979.67	2985.7	2571.03	16387.5	1489.01	2215.79	3243.46	35077.8
HIT 2105	32.3975	36.8046	33.1041	34.1356	36.4948	37.8233	34.4861	32.8979	33.9093	34.7037	34.1268	33.521	33.4751	34.6743	33.5928	35.437	1666.11	1158.94	62.6038	43.0891	75.3083	129.932	114.83	1151.02	564.099	557.022	319.982	37.0537	70.0718	40.9984	542.291	494.983
HIT 2107	32.3033	38.4151	32.8974	33.7541	37.5607	37.0472	33.0151	32.9003	33.5567	34.1903	34.0947	33.5148	33.6729	33.9527	33.2774	35.8827	60.25	64.4885	58.4327	45.9822	41.8927	64.8465	67.3686	141.177	61.824	103.502	57.2227	176.624	61.0335	44.3719	64.8155	215.801
HIT 2108	32.4406	37.5909	33.2976	34.4785	40.4287	41.1704	33.4848	32.7621	32.9949	33.4525	34.1291	33.9188	34.3023	33.7118	33.5312	36.0014	97.5223	108.27	193.268	52.1894	359.745	160.18	65.8631	53.4033	40.948	51.8614	56.6418	47.1265	78.2928	69.0605	68.1437	40.1445
HIT 2109	31.9271	36.5883	33.4476	35.5128	33.3178	35.7306	32.8303	32.9606	32.76	33.9973	33.8772	33.3715	32.895	33.0126	33.2455	35.4876	40.8064	38.9446	383.403	43.6963	1207.55	390.078	42.5461	36.8861	42.6117	35.5819	38.1261	36.491	61.801	40.7365	50.445	35.7882
HIT 211	33.7956	41.0481	35.1815	41.3949	38.9152	40.1513	72.1718	33.8514	206.416	40.0294	37.3512	48.1204	46.3046	38.1118	41.4372	43.354	2320.86	3436.95	1902.46	1550.4	1631.39	2938.49	2665.05	4054.39	1638.77	1054.45	2115.14	3886.58	1430.66	605.863	1294.14	16834.9
HIT 2116	32.1491	36.3212	33.0457	34.0423	37.6597	36.9587	33.5761	32.6421	33.0192	34.1589	34.2223	32.9101	33.1614	33.7055	33.0351	35.1822	43.5018	39.8117	39.4562	40.4512	40.9323	39.5269	40.3337	39.2383	37.498	36.7144	39.4704	36.248	60.0632	42.6342	52.6198	36.2108
HIT 2117	32.3822	36.4869	33.0655	33.7075	35.1599	36.5329	33.8123	32.1612	33.1971	33.6383	34.2093	32.9201	32.959	33.9535	32.7494	35.0747	46.1114	45.7243	39.0041	42.4414	39.6319	43.9656	42.0589	40.5936	37.7873	37.515	36.8251	35.6579	59.8784	50.1373	58.2822	36.1888
HIT 2118	35.016	40.1493	34.2369	34.209	514.73	39.7438	34.3058	33.4824	33.6805	34.2032	33.9673	32.9906	33.8018	33.3669	33.275	35.934	1551.15	1139.14	49.781	45.8844	2097.67	94.6594	69.7514	2774.04	57.4607	41.677	5355.11	47.7964	69.0871	45.3759	57.139	838.015
HIT 2119	32.5416	36.8982	33.798	34.4242	40.0725	38.0399	35.5977	35.5176	3921.2	46.7149	35.1059	35.903	35.1689	35.3795	34.3846	43.1152	17638.9	5286.97	10021.8	17748	583.416	3289.97	2771.15	10357.6	9935.52	810.172	486.289	2383.72	830.707	10150.4	1372.37	7323.08
HIT 212	31.9962	37.5433	33.2105	33.8043	36.3104	35.0514	33.5359	32.031	32.5773	32.9903	33.911	32.7907	34.2999	33.7286	32.4921	35.5535	47.5116	46.9606	55.5983	44.2248	48.2029	46.9168	47.3403	41.5978	38.9721	40.4227	43.7972	37.0834	66.4341	43.5011	54.4768	36.9468
HIT 2120	32.133	36.7384	33.205	33.3523	37.7332	37.555	33.2506	33.1204	33.0258	34.7703	34.0939	33.0192	33.202	35.0917	32.9122	37.4043	1515.15	49.9128	1176.83	2249.65	82.2029	218.901	195.624	1193.46	1013.23	37.0315	39.0437	37.0876	80.187	1321.86	59.3773	41.3517
HIT 2121	31.748	36.2553	33.165	32.9531	37.1414	36.6393	33.3818	33.0598	33.7445	33.4046	33.3458	32.8288	33.6253	33.8647	32.898	34.4242	489.274	48.7601	285.299	442.14	49.9212	94.7216	69.8017	229.741	226.916	39.9946	40.7983	44.1571	59.8778	318.759	55.821	42.7285
HIT 2122	33.0033	42.0767	36.1398	34.5328	47.8418	38.2659	34.3413	33.9478	33.728	36.1589	33.4271	33.6585	33.2229	34.5812	32.7013	38.7655	156.725	80.9271	441.776	660.472	161.039	103.468	145.918	141.772	240.767	39.8884	113.936	37.922	569.157	135.941	250.379	94.9958
HIT 2123	31.6293	38.6378	33.1658	35.6581	37.031	37.5401	33.4103	33.0141	32.9471	34.0878	34.0722	33.2455	32.9926	32.9331	33.7515	34.8035	292.046	440.883	142.054	190.511	55.841	59.5525	52.9444	91.5718	190.39	39.6713	112.413	37.2541	66.773	130.868	170.027	57.346
HIT 2124	33.651	57.4822	47.0592	35.2733	80.9421	39.011	34.4684	33.9625	32.8199	33.8351	34.145	33.6495	87.4041	34.2581	33.0464	40.1818	8260.5	4861.04	3619.04	4867.48	596.176	3812.41	738.36	2023.49	2420.55	2257.07	3169.32	1703.33	127.917	1788.96	1822.37	655.337
HIT 2125	33.0282	38.061	36.4839	34.248	40.0274	42.4592	34.2042	33.5684	44.5177	36.2654	34.7416	40.0159	35.0338	34.4809	35.1714	35.7558	51.8889	51.2719	45.9628	48.1443	51.4422	51.7614	47.9945	44.6474	38.7514	36.9982	40.7326	38.205	81.4443	45.885	57.2091	39.0671
HIT 2126	32.153	37.2769	33.6366	33.6252	37.5945	37.4221	33.9548	32.8797	32.9456	33.0739	34.0955	32.6042	32.8256	33.3553	33.0243	35.9818	43.1317	40.6197	40.0281	40.3621	40.9212	39.9757	40.3328	38.754	37.9315	37.2727	41.1334	38.4443	64.4385	43.0259	52.2447	37.0351
HIT 2127	34.1752	44.351	35.6663	36.4268	44.647	45.7606	42.9107	36.1078	39.5935	41.6561	37.4837	37.5176	37.6249	38.5728	38.2179	39.6824	51.1864	46.869	47.0444	44.4567	42.6761	42.1881	44.0927	43.5506	41.419	38.9282	40.8898	41.5792	73.4102	46.0747	54.6845	43.4018
HIT 2128	36.4102	44.0069	37.4989	36.7375	43.4051	42.4279	37.3623	36.8083	35.8838	38.9047	37.6549	37.5402	36.1836	38.7268	35.6218	39.717	127.864	71.647	96.3831	108.088	88.1379	365.753	274.867	92.8019	168.206	117.067	93.5372	39.9631	131.072	155.062	144.599	79.9689
HIT 2129	32.4775	38.558	32.9769	33.4193	36.4661	37.1251	33.2318	32.8116	32.862	33.4652	33.683	33.1639	33.494	33.1985	32.8433	34.9358	232.128	270.365	685.629	8816.81	385.449	525.692	129.412	159.77	1122.27	77.82	42.1773	138.327	8470.85	77.6635	1586	105.001
HIT 213	31.8814	35.8413	32.5367	33.1528	35.7227	36.9667	33.3165	32.1962	32.7658	33.135	33.316	32.9602	33.519	33.2424	33.5915	34.922	43.7966	38.1964	38.496	41.1449	39.7182	39.6377	39.7981	36.4343	36.3826	36.8003	39.8658	36.7442	57.7145	41.3693	50.1599	37.8885
HIT 2130	32.0546	37.1229	32.4435	33.4681	37.7389	37.6435	33.3031	32.5923	32.6585	33.8437	33.1796	33.4779	33.7335	32.7613	33.0678	34.4482	40.6576	37.3743	40.537	42.3623	38.5671	43.9513	64.9792	41.3492	36.9371	38.6596	42.2706	36.3463	55.5245	43.0852	59.4179	37.3485
HIT 2132	31.7951	37.5894	32.76	33.4687	41.1595	38.5513	33.5308	32.6439	33.8696	33.5248	33.334	33.0002	33.5035	34.183	32.6512	35.2046	228.63	623.689	53.2809	42.5323	47.9818	41.8664	45.5567	39.7853	86.9835	42.1606	83.6973	38.4102	68.9681	41.8555	147.571	98.5313
HIT 2133	32.0399	36.6079	33.2972	33.5006	36.3114	37.7711	33.2334	32.5732	34.4375	35.0404	33.3048	33.2732	33.0739	34.173	33.604	34.8378	594.496	1509.68	74.0965	238.163	62.0685	46.5209	58.5828	136.427	219.516	106.474	188.403	78.345	94.8739	49.7653	287.371	143.172
HIT 2137	32.0259	37.3524	33.3604	34.8092	36.6654	36.7056	33.5222	32.5611	33.2787	34.6871	33.6576	33.5514	34.4213	33.2852	32.7374	35.7829	46.9379	39.6214	41.1628	38.5006	38.3274	40.0285	47.1035	39.9421	38.6456	39.8606	40.7013	38.269	60.9368	42.6513	59.2208	67.6078
HIT 2138	32.9162	35.2687	33.4241	33.1231	37.5062	38.4534	32.7947	32.997	33.3305	33.2602	34.1292	33.8186	33.5201	34.2933	33.2988	35.9419	664.975	676.473	213.182	87.7714	41.8158	86.5576	185.068	310.002	117.441	235.419	144.248	432.101	89.2671	241.487	739.641	1194.93
HIT 2139	34.7612	45.3751	34.0503	34.163	38.4254	38.0224	34.1146	33.9718	34.0122	35.8311	34.5396	34.2395	34.8746	35.486	33.6682	37.1664	373.85	95.2574	69.7235	53.9325	41.0529	152.202	245.148	62.0004	99.3869	69.2762	283.87	486.953	81.2095	120.992	102.202	131.198
HIT 214	37.775	49.2955	46.8109	41.3905	44.7812	45.0862	43.3803	40.5423	41.3447	47.2624	41.968	43.0686	39.1316	39.1982	37.9439	45.7384	436.021	162.628	286.92	235.531	213.67	91.6385	335.659	150.461	145.196	84.8768	216.48	198.52	1032.25	219.377	298.785	905.439
HIT 2141	31.7047	36.314	32.9027	33.6877	36.7395	37.6413	33.3422	33.1204	32.753	34.1908	33.9371	33.5748	33.0482	33.6302	33.4627	34.8341	49.8403	54.1062	40.2276	44.2369	37.9641	41.6583	47.868	45.6696	38.6023	55.1907	41.9286	47.5628	59.8728	41.1807	56.47	46.1662
HIT 2142	40.1509	53.5919	45.0207	51.2852	53.6254	57.6914	82.9987	57.2254	74.2367	68.8412	55.8831	63.3582	58.9233	69.2853	59.3595	57.2672	956.315	1390.96	570.365	699.547	207.358	633.739	440.19	1467.91	439.489	2033.29	709.357	1410.87	200.447	289.872	695.645	1461.89
HIT 2143	38.8445	38.8567	39.8186	51.6367	210.888	39.29	34.9421	96.1075	35.8681	81.5644	83.0419	35.6129	35.3678	50.528	34.6319	36.3706	2289.23	1119.11	159.768	319.331	6344.74	244.027	86.2766	2307.93	554.959	682.473	33121.2	276.032	606.104	108.777	505.092	3885.28
HIT 2144	32.1784	37.0042	33.5218	33.6747	36.2171	38.0966	34.1966	32.5165	32.8913	34.0408	33.4958	33.2833	33.4485	34.1414	33.6929	35.9436	42.1315	40.5391	39.8248	41.1929	41.3526	40.2255	41.3087	38.4101	37.418	35.6222	38.779	34.6014	59.9299	41.587	52.7811	36.5133
HIT 2145	32.9943	38.255	33.4131	34.5529	42.5622	44.4927	34.0797	32.4835	34.0906	35.2323	34.4224	34.0188	33.293	34.2057	33.7717	36.4547	61.0718	49.9763	43.2551	42.9475	82.3697	38.7166	43.1564	80.2898	41.5482	43.9218	155.37	38.2165	81.5636	48.0087	73.3462	62.3285
HIT 2146	32.2778	36.9813	32.6624	33.6905	37.1396	36.9693	34.1028	32.6211	34.5184	35.1788	33.7286	33.4649	33.7707	33.4896	32.627	36.0653	44.0936	39.9721	40.787	41.3634	67.9477	56.8614	43.3163	63.1998	37.6518	41.2212	3250.6	49.2909	79.739	42.424	74.4876	234.218
HIT 2147	32.1516	37.5041	33.5034	33.8525	37.9259	37.9645	33.7783	32.664	33.2373	34.5407	33.3194	33.3128	33.4015	33.3519	32.8896	35.3823	123.121	43.3011	44.7546	45.3795	154.391	87.9011	50.1836	191.518	40.1534	49.4949	15546.5	102.973	160.984	40.7033	169.106	782.087
HIT 2148	31.798	37.1623	33.2349	34.6792	43.6796	36.2545	34.0474	77.317	32.7689	33.8479	33.5887	33.9263	35.4784	33.2417	33.1331	35.2331	64.3025	50.6733	41.2193	49.8097	249.894	118.509	44.5441	254.487	39.7313	56.5459	24229.2	109.843	247.16	50.7288	230.529	1147.5
HIT 2149	33.0578	37.629	34.7338	34.1134	37.3533	36.1438	34.2269	35.9216	34.833	37.2967	35.7329	38.4056	35.4981	37.7539	35.5485	42.2016	270.626	626.671	69.7822	73.7697	114.047	122.879	519.714	70.6387	82.8999	39.9043	316.057	44.2408	134.153	43.94	62.6936	53.0714
HIT 215	31.7525	35.6955	32.07	32.7155	36.906	36.2624	32.8866	31.2627	32.6708	33.1978	33.1381	32.2927	32.5916	32.5213	32.1371	36.1761	41.6962	41.1526	41.1452	40.8773	36.2988	41.5692	37.5897	39.9866	37.1324	34.4895	39.1226	36.9948	58.705	48.0277	55.4043	35.5775
HIT 2150	32.0888	36.4362	33.1004	34.2634	36.0968	36.9937	34.1217	32.3275	33.5683	34.2165	34.1222	33.7204	33.5845	33.4468	33.6329	36.0986	78.9713	138.599	44.1452	42.6523	46.8118	49.7241	105.819	42.5856	44.5023	36.3213	87.4501	36.8572	75.503	43.8095	52.2518	37.8394
HIT 2158	32.6067	37.3359	33.2645	33.4386	37.2614	37.8184	33.7362	32.6497	32.8586	33.5257	33.4899	33.0976	33.2045	33.2002	32.612	36.462	46.5879	40.2806	40.8122	39.6457	40.2347	39.6451	40.8029	356.936	37.7875	40.9705	39.1223	36.8558	57.7637	41.8383	50.6963	39.1001
HIT 2159	32.1134	37.0383	32.3796	34.5107	37.8313	37.745	33.2347	33.2059	33.6862	34.4233	37.655	32.9743	33.509	34.8982	33.1718	34.818	44.1195	40.1084	42.6415	47.6178	38.8995	41.0269	42.9518	65.5968	37.2382	36.4876	38.2885	37.4332	57.5011	43.2049	47.8875	37.8323
HIT 216	31.8396	36.9158	32.916	34.0464	38.1379	39.4071	34.2339	33.6563	44.4644	35.0299	33.7947	33.5952	34.9118	34.1873	34.4345	34.9154	102.384	181.506	439.306	441.123	449.155	117.029	436.577	178.294	154.091	45.6693	391.51	174.975	894.986	54.2041	542.586	158.01
HIT 2160	32.234	35.8034	33.2015	33.9871	44.7148	36.3313	33.4758	58.417	32.7851	32.9736	33.3354	33.0429	32.9702	33.5146	32.9119	35.5292	74.0161	56.4966	40.3296	45.3522	96.1779	53.2527	46.4175	606.342	38.3036	50.3775	883.283	39.2247	70.4937	47.6063	63.3757	96.2105
HIT 2161	33.3775	39.7243	33.5522	34.0227	38.6522	37.7665	36.9077	33.2742	33.9611	34.1367	34.9773	37.0818	34.7913	33.7706	34.4008	36.4781	74.8695	136.111	47.5246	41.0002	78.2792	67.0479	60.8393	46.3795	38.7229	38.7706	40.6571	37.5021	59.9889	42.9963	169.11	41.5289
HIT 2162	32.5849	36.8102	33.4411	33.3893	37.1963	37.3891	34.0557	32.7458	32.8978	34.7971	34.0402	33.6496	34.1179	33.3265	33.1697	35.4083	123.971	143.118	89.9071	47.2337	104.177	82.918	73.3391	50.9038	39.2624	49.0049	108.068	44.1278	63.9498	66.5191	199.495	65.8275
HIT 2163	33.3376	56.8495	34.4161	35.9057	41.0254	42.4253	34.5153	33.184	61.4546	42.9071	37.0124	36.906	36.1973	34.9195	35.1481	37.9046	104.01	310.344	48.2235	51.8895	244.821	79.4879	73.8849	41.5468	40.2294	40.6883	41.954	37.6639	116.054	44.3176	365.232	61.3171
HIT 2165	32.2057	36.8417	32.8178	32.8354	38.3563	37.1795	33.3954	32.1172	32.799	33.3988	34.3134	33.876	33.1071	33.8914	33.0032	36.6402	49.4109	44.3735	42.4135	41.3013	43.1589	43.3177	42.6967	41.7817	36.2256	35.914	39.5865	37.0444	60.6271	42.2804	68.6014	38.1254
HIT 2166	31.9958	36.1677	33.1208	33.252	37.3423	37.0665	34.8982	32.5665	33.0598	32.9214	33.398	33.1397	481.016	34.0188	33.1465	35.4801	252.282	484.421	173.215	219.003	146.834	127.115	242.657	76.746	449.026	92.3538	75.5661	88.1762	97.0425	57.5288	272.404	112.557
HIT 2167	31.7647	38.0766	32.7632	33.2541	36.4458	36.6528	33.8533	32.5807	33.0412	33.168	33.4266	33.9003	32.6699	32.0168	37.642	35.6605	42.485	37.1471	37.353	37.691	40.0761	40.3278	39.4141	39.1413	39.4667	36.3064	39.4068	37.4109	63.3915	43.2511	55.3325	37.687
HIT 2168	32.1811	35.1455	33.176	33.707	35.7229	39.1425	32.6126	32.6843	33.4201	34.3838	33.1988	33.0286	33.5411	32.9765	33.2046	35.2255	44.3966	40.5252	39.5369	40.9859	39.99	40.2694	40.1028	39.9815	37.2854	37.6613	38.777	36.8858	56.9937	42.211	49.344	37.074
HIT 2169	31.616	36.9561	33.0955	33.411	38.194	36.6909	32.5719	33.0623	33.0248	33.6371	33.5421	33.5866	32.2864	33.6012	33.5422	34.8729	42.5581	41.5202	40.2921	42.5061	41.9799	42.6651	45.6327	40.5153	40.013	35.6561	38.3282	35.7382	57.3095	41.5969	45.3273	39.0309
HIT 217	32.9937	37.74	33.4857	34.1088	38.0108	40.8641	34.0882	32.99	33.6911	34.5948	34.748	34.0511	33.8482	34.0981	32.8096	36.2819	51.867	48.5813	52.2126	48.5073	44.049	53.3898	48.0921	46.7971	38.8606	37.0852	41.8764	36.2496	54.3489	42.2614	53.933	38.0932
HIT 2170	33.7531	36.0287	33.3796	33.1104	37.9407	36.1595	33.3859	32.4235	33.3022	34.1442	33.859	36.0682	33.2376	33.4962	33.0885	35.1465	42.2618	39.6455	39.5205	40.7938	42.9784	40.7743	42.7203	39.8546	39.2293	37.7203	41.81	35.7249	61.0295	39.8318	52.5033	36.5716
HIT 2171	31.6952	36.1222	32.6833	33.2109	36.6726	37.3499	32.9687	32.4493	32.8403	33.382	33.6799	33.205	33.0073	33.3508	32.436	34.7918	42.961	42.0592	40.7459	38.8106	39.7852	41.3446	38.7305	39.4673	37.5778	36.0654	37.0633	35.5404	59.6491	42.0057	51.778	37.09
HIT 2172	31.9546	35.0571	33.948	39.8823	36.8723	37.0457	33.6414	33.7172	33.0172	33.6229	32.7913	33.6147	33.3531	33.2857	32.5458	34.8937	43.5782	40.2615	37.7779	41.9356	42.3563	46.7422	42.519	38.9937	45.9155	37.5049	39.4895	36.0814	54.8161	41.9869	51.0027	40.2844
HIT 2173	32.4144	39.5922	33.2377	36.6337	38.9685	34.8825	49.7879	39.7668	36.9363	44.6404	38.9251	38.003	37.8166	42.5808	39.2123	39.3892	46.8647	46.3385	42.5414	41.8859	41.4192	467.857	48.3898	42.7042	38.9725	38.4909	41.5861	38.1957	63.438	44.1088	51.9393	37.2807
HIT 2174	32.3588	36.1022	33.0249	33.5306	38.3907	36.9759	33.5604	31.9865	33.0569	32.9786	34.3183	33.7515	32.8116	33.7093	32.4472	35.3635	1531.06	1208.09	742.033	192.616	60.6415	1002.96	826.334	712.626	272.585	580.923	537.01	551.906	343.354	920.534	2987.99	4808.03
HIT 2175	31.8846	37.4635	33.648	32.2525	36.5222	37.1471	33.2132	32.8504	32.7118	33.4006	34.1856	33.1509	35.4032	34.0087	32.5557	35.8287	43.4146	46.869	44.9634	43.4543	43.5767	330.496	60.4176	41.4555	37.9896	37.338	39.3402	36.4216	57.0004	40.8903	56.9675	36.9891
HIT 2176	35.3254	41.9917	35.0243	41.5928	40.6012	39.3521	37.0611	36.7455	38.8907	43.7281	43.0472	41.8666	37.9949	41.8013	36.3992	47.1906	1517.42	988.37	582.839	250.916	163.665	469.904	1517.54	723.808	917.529	805.608	924.909	1191.4	1642.34	215.476	270.23	1255.4
HIT 2177	31.9613	36.7049	32.908	34.0575	37.4015	38.7814	33.6004	33.2591	32.9621	35.2664	34.3263	34.6019	33.0961	35.0089	33.2525	35.1224	43.9616	37.9346	39.1717	41.2367	42.3539	45.3788	39.5045	37.4472	36.9892	36.4952	35.8518	33.7632	62.1979	48.3947	60.7975	44.0162
HIT 2178	39.5964	56.567	45.725	53.4754	53.2571	57.4172	92.5212	66.6254	78.0762	77.2786	67.3609	64.0536	61.1679	71.0232	64.7557	61.3872	803.016	1185.2	487.747	607.355	179.182	551.959	376.231	1256.73	444.305	1798.05	719.118	1353.18	215.885	285.096	610.686	1347.52
HIT 2179	32.6446	38.4354	34.1222	38.8341	38.2266	39.9065	65.0688	33.9216	184.338	38.6695	36.1893	42.7753	43.5505	37.2757	39.2886	43.8136	6279.79	6240.74	1519.07	1635.25	499.486	4141.41	3237.11	5492.95	2553.68	674.936	2244.15	4465.51	1062.8	1157.97	1134.54	23361.2
HIT 218	32.5912	37.524	33.4839	34.2652	36.9984	38.228	33.5754	33.0301	34.0507	33.8361	33.7794	33.0785	33.3452	34.3051	33.4525	35.1922	59.9437	48.8375	60.4219	44.7619	52.2625	45.0649	52.4039	41.4472	38.6334	39.7811	63.984	39.3061	54.6837	48.546	69.667	41.1094
HIT 2180	32.0559	35.2669	33.0567	32.7889	37.9431	37.5502	33.7069	33.069	33.7633	34.5842	33.6897	34.4981	33.2766	33.387	36.3001	35.9855	45.6648	39.7471	39.9708	40.5807	44.4349	43.6968	44.7863	41.8822	37.9915	36.4156	42.7249	39.2786	60.4618	43.8287	54.5305	36.5803
HIT 2181	32.1284	36.1087	33.1041	34.1386	37.4966	35.8309	33.2189	33.5691	32.1532	35.0999	33.1902	33.5551	32.9925	33.0284	32.4733	34.6139	45.7063	38.2393	41.4153	45.8227	39.5111	62.3418	56.5117	38.026	40.0325	36.9932	39.5992	37.494	59.7568	43.4736	57.0321	37.7902
HIT 2182	32.2494	40.4539	33.4583	34.1011	38.2961	38.9706	33.9805	33.6954	33.7391	38.1641	34.5621	33.6162	34.3736	35.1584	34.4311	36.9436	406.077	535.052	52.125	46.3283	87.6571	698.161	51.6267	41.0072	210.11	37.548	39.4854	36.5015	95.8762	90.9048	80.914	37.0344
HIT 2183	32.0232	35.9092	32.6642	33.3658	37.3625	38.8266	32.7159	32.3832	32.8101	33.148	32.8879	32.8901	32.8203	32.6995	33.0943	35.3081	54.0232	39.7691	40.7789	39.7599	42.4646	41.7798	39.4234	40.4473	38.0285	36.4087	36.9476	35.0725	58.6895	42.4093	49.4321	36.3835
HIT 2184	32.1785	36.2151	33.1126	33.0299	37.2065	37.1353	33.6869	32.4962	32.5255	33.4615	34.1253	32.9062	34.3146	33.4463	32.7478	35.4832	1469.9	579.021	42.258	38.3418	130.454	97.6837	39.3415	38.2963	453.181	37.4016	43.6096	34.973	66.8242	256.65	173.145	36.8111
HIT 2185	32.2431	37.3694	33.5211	33.6855	37.9252	36.0306	33.3039	32.65	35.4452	36.4844	33.7371	33.1718	35.1798	33.853	33.0778	34.8202	2041.23	122.567	45.5887	44.639	564.615	434.536	709.111	59.9239	603.923	2507.48	2653.42	63.7373	56.4608	46.013	4107.03	85.8375
HIT 2186	32.0112	34.9159	32.7255	33.1172	35.7073	35.1563	33.2975	32.7936	32.6214	33.1636	33.6826	32.9969	32.6652	33.3299	33.9029	35.6796	68.6357	39.9438	39.0994	37.7757	48.0708	44.6311	45.0794	39.1627	42.8772	81.1811	80.4347	37.3488	58.2337	42.0824	101.688	36.7257
HIT 2187	31.9143	39.6769	33.3656	34.2795	37.9563	36.6578	33.7848	33.2413	33.722	34.3045	33.2031	33.4796	33.1232	33.7468	32.985	35.3289	89.5251	46.3329	42.8743	42.4484	55.22	51.1194	54.2039	41.6475	47.1371	74.039	81.029	35.6338	59.657	43.2414	137.645	39.3786
HIT 2189	32.0454	37.2253	32.7001	33.9731	38.6607	38.4335	33.829	32.4667	32.9912	33.4487	34.1044	33.2223	33.2251	33.6503	33.5735	35.1024	41.787	37.0548	38.2916	40.7235	39.4011	53.9255	40.7509	36.9755	37.5942	47.0597	40.3707	35.0232	57.3698	40.765	49.8649	34.4764
HIT 219	32.5649	35.858	33.107	33.5528	36.991	38.6024	33.4236	33.8028	33.4846	33.5983	35.7306	33.316	34.3918	34.636	33.5122	35.278	53.8431	76.0354	47.5434	44.5299	39.5219	60.3971	41.026	42.3497	35.6031	46.7607	40.6403	40.4634	50.6713	47.5971	57.6377	36.4563
HIT 2190	32.5174	39.1359	35.5406	53.1208	39.6885	37.377	150.85	80.3242	43.0266	78.8282	56.6321	51.1769	86.568	87.752	70.1625	39.3786	449.169	75.9126	122.651	59.9103	87.353	91.6661	128.485	88.8399	111.262	412.697	374.885	50.5774	72.3668	55.3369	294.299	77.1432
HIT 2191	33.0166	38.9497	34.0454	39.2334	39.0378	38.4239	70.7165	33.4816	237.522	40.0154	36.6309	46.1618	45.2507	38.1951	39.0701	42.0807	2651.57	4578.18	1886.28	32649.5	690.625	78456.5	2010.08	88274	4674.07	642.065	2892.22	7750.78	903.638	831.679	845.451	106728
HIT 2192	31.9574	36.3779	32.8713	33.8486	36.7781	35.7499	33.2522	32.8484	33.0927	33.2752	33.6846	33.0784	33.6538	33.8768	33.3293	34.904	90.5085	43.1206	48.7772	294.857	57.0312	1579.72	66.9369	1872.51	205.298	40.0491	40.4114	904.944	64.4314	53.6701	55.8481	9683.73
HIT 2193	32.0496	37.0823	33.2835	34.4688	37.7992	37.7655	33.4474	33.0585	32.7937	34.0222	33.697	32.7752	33.1323	33.955	32.5817	35.5979	64.3605	38.7123	43.7336	2400.52	69.1093	12976.1	62.3031	12669.1	1018.29	35.715	37.8213	549.969	69.3668	47.2856	51.8236	35920.4
HIT 2195	31.986	36.1428	33.1385	34.6905	38.164	39.2975	33.2704	33.2068	33.0637	33.9994	33.7409	33.1089	34.2606	33.1624	32.7036	34.9868	69.9037	128.468	61.4741	96.2725	43.8755	198.928	182.273	154.231	121.721	62.3516	39.7518	173.146	72.474	81.9204	49.6946	793.985
HIT 2196	32.7352	37.2172	33.9734	35.04	38.6242	38.6563	36.9761	34.1311	33.3594	34.4173	34.2345	33.5891	691.897	34.1574	33.5864	35.916	5690.9	18564.9	3234.86	14741.6	973.127	39009.8	20330.3	30447.2	9582.33	7353.78	9500.69	21111	2599.55	5318.72	2925.34	78714
HIT 2197	31.8797	36.3245	33.0754	34.2018	38.9247	35.9819	34.6946	32.3776	33.9345	33.6076	34.0342	33.708	33.581	33.2778	32.5382	36.5207	67.5702	39.7515	41.4329	41.2833	41.3674	64.0946	318.722	2065.24	42.5407	38.4101	38.3744	36.1144	61.8475	39.4336	54.8278	67.1523
HIT 2198	32.7805	39.4647	32.9419	33.7212	37.0514	39.7443	33.3552	33.1505	33.5875	34.176	33.5464	32.9351	33.3573	33.6672	33.0479	35.5653	53.0497	44.6522	41.5826	42.3744	36.5722	44.0203	88.4174	557.645	37.9087	37.0611	37.9466	36.0286	59.9096	41.7943	48.4727	49.7258
HIT 2199	32.1671	39.0178	33.6769	34.1473	39.8074	35.7305	36.4326	35.2593	36.6941	40.2039	34.2673	35.933	34.877	35.2428	35.3391	38.5984	75.7346	49.2829	42.1588	43.372	45.8394	118.52	1380.7	13655.9	48.2006	36.6835	38.9321	37.7851	66.6598	42.9941	54.9133	351.324
HIT 220	33.8251	40.715	32.8373	33.9635	37.4383	36.6437	33.6392	32.6018	34.0468	33.2542	33.3308	33.0021	33.2224	33.2172	33.1834	35.1425	49.2231	43.9014	46.425	38.1634	41.651	43.2124	39.7812	39.7311	37.3579	35.9846	41.7588	35.4596	60.3147	43.8139	53.5322	38.1756
HIT 2203	32.4279	35.162	32.9009	33.5537	37.5278	35.9373	33.0776	33.1394	32.7481	33.9391	33.996	32.8063	33.7765	33.6855	33.0929	34.9432	433.509	52.8256	42.0193	41.5798	122.041	104.098	144.998	39.5907	153.115	652.64	540.251	43.6204	60.1239	44.2892	1095.09	48.3614
HIT 2204	32.0855	35.5499	32.9791	33.1657	35.5396	36.4482	33.4616	32.8009	32.413	34.5176	33.5362	33.0151	32.923	33.3799	33.4885	35.7278	43.9539	38.278	39.5608	39.9689	40.6782	41.5203	38.8755	39.3672	38.1301	40.038	42.3522	35.6987	56.4954	39.6783	55.8164	36.2691
HIT 2205	32.7416	37.5586	33.4995	34.9175	39.7561	37.8705	33.6523	32.2924	33.3858	34.1561	33.7667	34.3203	33.1135	33.8471	34.7539	38.3769	45.9213	41.9825	39.4779	42.6026	41.9283	40.0456	38.53	37.6588	38.118	41.0062	44.1337	36.8597	61.1611	41.1553	58.3508	37.4354
HIT 221	32.2762	35.3254	32.8777	33.4209	37.0584	37.9123	33.4154	32.6095	32.4511	33.2105	33.0847	33.8893	33.3899	33.4441	33.5723	35.9387	45.8939	42.881	42.3529	42.1975	41.9958	45.8754	44.821	38.6842	35.9914	37.7107	39.0648	36.7327	88.0798	40.701	53.253	37.9044
HIT 2215	32.4101	35.3809	33.0623	34.3022	37.8871	37.0465	34.3458	75.8809	33.8486	34.8932	34.9509	33.9449	32.9754	34.3637	32.9255	34.5687	49.3505	42.7623	44.2044	97.5552	5336.25	274.754	49.8499	42.2827	122.982	36.734	77.6776	49.7729	74.43	54.0944	801.693	65.0546
HIT 2216	31.907	35.2402	32.4891	33.6872	37.1413	36.2708	33.3921	32.6556	32.5375	33.0934	34.0651	33.1742	33.5787	33.5142	33.1849	35.365	48.119	43.4817	41.7254	42.0691	41.3231	44.2202	42.0434	44.0708	37.8276	37.035	38.8354	35.7408	53.471	48.7113	63.8437	36.6913
HIT 2217	32.2528	35.8237	33.6061	33.8705	37.9499	37.3244	33.2545	34.9349	33.7375	34.2931	34.1313	34.2597	33.7303	33.8267	33.6363	34.9002	43.3042	41.076	40.0896	49.4094	8869.65	356.922	51.5719	39.4059	138.457	38.3355	41.8899	58.3759	61.6785	42.9782	1636.31	46.7623
HIT 2218	32.2954	38.4269	32.7048	33.9452	37.4709	37.1971	33.5862	32.333	33.2451	33.3304	34.061	33.407	33.088	33.7305	32.8884	35.02	44.0347	41.6368	42.8125	43.9351	449.448	57.6701	42.5977	42.2252	41.7942	36.5977	41.8238	38.1768	63.3661	43.8838	106.45	41.852
HIT 2219	32.4372	37.0149	32.6489	33.5406	36.8664	38.2982	33.2681	33.5368	34.9961	33.7775	34.3033	34.937	33.4748	35.5898	33.0817	35.4743	45.6845	40.1351	39.8422	44.1899	975.029	78.0194	43.2855	39.5633	46.2473	36.5868	40.4522	38.8494	62.1483	41.9519	165.485	39.1863
HIT 222	34.5011	35.1538	33.2362	33.4854	36.2843	37.5448	33.3434	32.5288	32.9142	33.5274	33.6499	33.4738	32.8822	32.9047	33.368	34.5201	50.2822	358.149	945.385	369.892	43.1553	42.5435	44.0565	106.291	38.2681	371.482	43.2007	61.4329	63.7251	44.3496	167.47	37.6968
HIT 2220	32.7251	38.7571	33.2769	33.6543	136.574	36.4549	33.6785	64.232	32.4048	33.7591	33.1101	33.8689	33.6246	33.073	33.5137	35.6018	53.6636	104.261	41.9126	88.5631	967.811	78.7704	40.8318	45.1712	47.437	43.1335	74.9449	40.8432	125.585	47.291	254.329	142.464
HIT 2221	33.1026	38.5135	34.1851	35.0129	39.4232	36.3926	35.3499	34.4212	27304.2	60.7526	35.3744	35.7887	34.4094	35.3049	34.5065	42.8102	32765.1	6437.07	2533.22	975.117	3892.33	23504.6	2475.46	1286.92	1460.3	1258.27	497.854	2533.18	763.595	2038.47	992.791	16255.5
HIT 2222	32.8618	35.7413	33.32	33.6898	36.7361	37.2516	33.7592	32.6	34.5699	32.6282	33.8563	33.1105	32.8332	33.3657	32.7626	35.4112	559.457	111.261	41.7339	41.8918	105.307	414.946	45.5652	42.5697	52.9163	36.6731	39.0686	40.8794	59.6424	42.2811	51.2335	38.6702
HIT 2223	32.7073	37.5567	33.4186	34.0999	37.6041	36.6046	33.5385	33.1099	33.1655	34.4999	34.6657	33.357	33.465	33.4247	34.147	36.6519	1981.21	42.7494	41.8487	50.8076	888.254	5937.44	46.4435	63.8204	991.827	36.9821	40.2508	36.8494	66.4991	41.8681	50.5111	76.93
HIT 2224	36.1579	49.2721	40.7138	51.0574	165.829	338.005	36.6431	37.0429	57.7178	791.647	138.99	102.267	45.1817	35.5903	40.8376	38.4544	7040.82	3789.87	11855.1	120.411	8271.11	6989.34	2147.27	168.578	1367.08	129.802	301.305	102.375	1775.67	88.9474	820.49	243.403
HIT 2225	32.0859	34.9373	32.4567	35.4625	36.2034	37.1143	32.757	33.1443	32.5887	33.5762	33.4721	33.7883	33.6909	33.907	33.9741	35.53	48.116	49.9584	40.8719	46.8512	43.4773	57.8189	41.072	41.1606	39.8716	37.122	41.5334	36.6579	61.0961	44.8133	52.1732	36.1185
HIT 2226	32.3802	36.5703	33.4672	33.5153	44.9171	52.1456	33.6023	32.5336	32.6025	32.9944	33.733	33.4429	34.8073	33.2001	33.1953	35.3058	1857.5	123.535	55.4772	43.2567	768.165	166.336	58.6692	44.1276	68.684	35.3133	39.6535	37.9245	57.6232	42.2372	57.2861	37.3232
HIT 2227	98.7003	56.5683	79.9615	47.4315	146.547	40.5878	41.7493	71.0341	38.2003	50.4631	46.4957	37.5134	36.6089	41.0006	36.4643	43.5927	1298.92	109.533	84.0415	569.016	1182.58	116.306	74.4747	287.81	105.603	90.4372	405.071	91.7003	6470.99	101.665	145.536	180.673
HIT 2228	31.7745	37.165	32.7113	33.7301	36.946	37.9505	34.8487	33.003	32.6613	34.2005	34.0498	33.3562	33.3608	33.4603	33.8534	34.1873	43.0746	38.8935	39.6761	40.2996	40.2881	41.0935	41.6048	39.3686	37.3066	36.7714	40.3717	37.2048	58.8956	44.8043	55.3543	35.8088
HIT 2229	36.4825	43.0565	35.5437	36.4099	42.4435	39.7122	41.2465	36.975	37.1488	37.9761	36.4723	36.5153	38.5538	36.7701	35.8453	37.2585	658.167	61.3549	52.4274	312.603	62.1137	64.9705	53.6972	60.7675	56.8157	41.2792	58.1806	38.8396	69.1659	45.2624	55.6239	49.9947
HIT 223	31.924	37.3493	33.369	34.3146	37.3708	37.126	34.5207	32.7863	33.4711	35.6525	33.8094	34.7251	34.1269	33.3769	34.7522	35.8136	45.5288	42.6153	40.7405	40.8286	41.6671	40.7452	39.0978	38.8774	38.1931	37.1037	41.1039	37.1009	57.2517	41.2075	51.5191	35.4397
HIT 2233	32.1163	37.3341	33.1615	33.9343	37.7928	37.2228	33.391	32.871	32.913	34.3596	33.5638	33.0471	33.4427	33.4554	33.4503	35.1758	204.516	41.3063	39.7052	39.5938	39.5238	49.7209	40.0418	40.1657	37.1995	36.8228	39.9252	36.1552	61.3985	41.9918	50.1743	35.6714
HIT 2234	32.1854	36.2761	33.0844	35.5328	37.8941	37.4167	33.6457	33.3471	33.4577	35.3998	34.2341	33.4026	33.7834	34.6585	34.3562	34.8504	47.8892	43.3628	43.5595	42.4671	40.3626	43.0127	40.9011	40.2472	36.914	36.5799	38.292	36.751	60.5657	43.4606	52.1807	37.0663
HIT 2235	32.1175	37.6118	32.8913	34.5576	38.4469	37.4932	34.9571	32.6155	39.6932	33.8663	33.8691	34.0381	33.6299	33.5219	33.5662	37.0205	667.51	56.0699	40.9058	41.866	46.4161	75.0467	39.6223	41.2588	40.5223	36.3354	38.0852	36.32	62.6805	47.1545	58.5929	36.5322
HIT 2239	70.8568	40.1791	44.9535	50.1906	290.767	39.5412	34.0015	116.018	34.5611	58.6234	56.3402	35.7231	34.1191	41.1989	33.9015	35.9657	3654.62	1599.54	97.3198	281.964	41819.1	1846.32	750.4	15697.3	295.642	1138.16	46823.7	189.446	975.339	78.5942	459.293	3692.5
HIT 224	32.4992	37.8027	33.3108	34.429	38.6743	37.5096	34.5353	32.7264	32.6158	34.3473	33.3095	32.1303	33.9673	33.0606	33.8547	35.4302	43.334	45.6683	42.8329	44.1751	45.0252	45.0528	46.5148	37.6825	38.1008	38.1121	38.9765	36.7872	55.8642	41.5507	48.3183	36.2526
HIT 2240	32.4113	38.2392	33.5724	37.8067	36.624	37.7029	33.383	33.255	33.6325	35.29	33.1031	32.9369	33.967	34.3536	35.6101	33.9542	39.3855	36.7452	37.0809	40.2121	200.849	45.6659	42.6364	70.7879	36.3256	36.8971	266.192	37.25	59.4154	41.0137	50.984	36.5527
HIT 2241	32.7098	38.7502	33.2978	35.1432	41.1518	40.4817	33.828	34.2371	34.1413	35.0737	34.8278	33.713	34.174	34.5852	33.0852	36.2389	43.4632	44.3487	43.0296	42.8948	224.726	49.5193	42.1459	79.5803	37.4343	37.56	278.869	38.6576	65.1457	43.3716	54.1584	38.4054
HIT 2242	31.9391	37.5902	32.772	34.493	37.2896	37.4401	34.5151	33.1569	33.4192	34.1604	34.427	33.4641	33.6461	33.4314	33.8471	35.4429	40.0254	42.2433	38.0107	40.2439	304.238	46.2544	47.3243	45.2208	37.7133	36.8865	440.307	37.8994	62.8969	42.7686	50.4486	37.3001
HIT 2243	32.0705	36.6985	32.5771	33.7033	37.2543	37.3332	33.0697	32.688	33.3354	32.9628	33.1914	32.9645	33.7336	32.886	32.7244	35.1415	42.3919	40.598	44.3258	40.995	56.1563	41.9586	40.6152	41.316	36.3523	38.0527	57.677	36.1409	56.8839	41.0177	52.2609	34.937
HIT 2244	31.833	36.0247	33.0071	34.6828	36.6909	38.1284	34.1861	32.6188	33.369	32.9425	33.7537	33.2629	33.2108	33.6396	33.0819	35.5818	41.6306	36.5189	39.8242	43.1852	2295.7	140.858	80.325	486.628	36.4237	36.159	2480.6	40.4244	63.2088	42.1903	48.4674	35.937
HIT 2245	35.4159	40.6098	35.5917	35.512	39.0751	38.9588	37.0958	39.311	1226.71	45.2355	38.0093	38.9556	36.7684	42.0656	37.2222	38.5922	503.914	358.236	555.5	195.876	69.2027	658.945	204.376	565.539	183.592	149.877	110.389	325.59	130.358	269.207	150.049	730.231
HIT 2246	31.847	37.8387	33.2062	33.5895	39.2001	36.2364	33.7514	32.4114	32.9853	34.2003	33.7859	33.3193	33.3006	33.835	33.6807	35.6339	43.7173	41.708	40.3154	41.287	41.4151	56.7012	41.8927	39.5539	36.8118	37.579	41.0629	36.3641	56.954	38.8254	47.6399	36.4349
HIT 2247	32.4297	38.9435	33.7862	33.8755	37.2924	36.3085	33.1139	33.0342	33.9332	34.2661	33.8783	33.8554	34.2036	33.2442	33.434	36.0656	50.7151	46.877	42.9725	42.4024	43.4413	75.2132	44.2534	41.7938	37.3162	37.1126	37.8706	36.1804	57.4694	41.7964	52.3297	36.8545
HIT 2248	32.1493	38.2813	33.4172	33.2291	37.3531	37.1624	33.811	32.7968	32.7179	33.9368	34.2129	33.1109	34.7409	33.3535	33.9584	35.4269	146.112	432.617	251.763	215.422	57.9936	330.789	309.348	511.351	232.616	86.904	75.7528	365.829	238.626	78.4756	114.31	898.697
HIT 2249	31.8591	37.8205	34.8799	33.566	36.3702	35.8255	33.4115	32.2512	32.7608	33.9823	33.3034	32.472	33.3115	33.2259	33.0861	34.3214	41.2888	41.6478	40.51	39.2828	38.622	42.1322	40.6562	38.8854	38.614	39.9015	38.7039	33.8707	62.1583	42.8495	48.7833	36.0539
HIT 225	32.7069	38.2041	34.6473	34.5067	38.2003	37.9023	35.2202	33.1513	33.0753	34.0169	33.7684	34.0377	33.1172	33.86	34.0659	35.8787	39.3819	38.2381	39.0393	40.1816	46.1476	52.2059	40.7291	38.3556	36.4006	35.935	38.727	36.4512	63.1406	42.5518	48.9477	35.9168
HIT 2251	32.1899	36.7892	33.0859	35.0844	36.7645	37.7874	33.1597	32.5829	33.1602	34.25	33.3343	33.4489	33.2957	33.3373	32.8334	35.0233	46.3064	41.1531	39.383	41.1258	85.9357	49.5996	44.3374	41.4608	37.0542	37.3307	41.6168	36.5468	59.1839	41.5536	51.8343	36.8828
HIT 2252	32.1837	37.291	32.8197	33.7342	37.067	37.2705	34.1431	32.5152	33.6801	33.5931	33.8126	33.167	34.8599	33.9824	33.2728	34.5812	41.0549	47.8076	42.0148	42.0004	56.4889	43.7974	44.1221	39.7686	38.8259	37.3537	40.0032	36.2919	58.0277	44.2028	56.421	36.5081
HIT 2253	32.0317	35.8712	32.6353	33.8744	36.1786	36.2034	34.7283	32.8895	32.0771	33.4963	33.7316	33.6064	32.9571	33.2725	33.0608	34.3393	42.3877	39.3174	39.3637	40.1254	127.171	50.2392	39.9474	39.1185	38.3576	35.8844	38.0338	34.678	62.8718	41.0575	55.7826	36.108
HIT 2254	32.4437	37.3483	33.184	33.9293	37.8622	37.7359	33.6695	32.6796	33.1759	34.0817	33.8007	33.2387	34.2229	33.6822	33.5415	36.1798	473.107	102.371	41.2725	41.5571	138.667	59.4591	42.459	41.4027	40.5446	43.1272	117.79	38.0533	140.441	40.6881	51.097	39.815
HIT 2255	32.5732	37.1457	33.2813	34.495	37.064	37.9888	37.803	34.8508	33.5694	35.1498	35.6196	35.3616	34.6886	33.8292	34.6875	36.1394	42.1195	38.5705	40.5438	40.3055	49.5385	45.2295	40.9614	39.1545	36.5911	36.9911	39.3581	35.6618	57.091	43.4967	48.2624	35.3763
HIT 2256	55.0318	41.7941	45.0543	36.1058	42.961	38.1088	36.2131	34.6093	33.7659	42.5449	34.8037	45.1933	41.0662	34.5726	35.3329	48.7188	4108.53	55.4582	55.1073	59.3484	697.358	312.449	66.1528	58.4746	408.705	45.5138	2635.09	43.2292	57003.2	96.2289	150.978	146.766
HIT 2257	33.4424	40.7979	33.6021	38.4429	39.7611	38.3388	75.5962	34.2435	196.228	39.0563	37.0718	49.2224	49.1775	38.2152	39.3271	44.1608	5748.79	5931.4	1452.11	1406.05	453.91	3391.75	2563.09	4470.17	2179.38	536.176	2142.1	4404.26	785.496	794.116	888.69	18884.3
HIT 2258	31.8328	36.5362	32.6734	33.269	36.2787	38.5008	33.7192	32.7747	33.4016	33.4764	33.8522	33.0655	33.5706	33.4113	33.0975	35.7375	43.6389	49.4984	39.7918	40.2105	39.7043	49.3466	41.2225	46.1919	37.8735	38.143	38.8346	42.6156	56.7783	41.9897	48.9945	60.4772
HIT 2259	32.291	36.3499	32.945	33.152	36.16	36.9577	33.5794	32.0402	33.6142	33.6344	33.8398	32.6523	33.4495	33.5037	33.0492	35.5987	111.11	89.4956	39.0501	42.0168	42.2802	75.196	46.963	67.2596	52.2086	40.8908	38.1731	353.336	57.7024	51.6753	56.7257	103.685
HIT 226	70.1709	53.8843	59.872	54.5281	214.682	392.248	43.7071	40.2121	512.549	1196.04	174.661	93.3997	54.8959	40.2143	51.6011	40.7736	40609.6	1027.25	2139.46	92.4497	24873.1	1319.39	1075.57	163.998	418.383	112.269	122.688	43.8544	87517.2	265.026	436.591	123.684
HIT 2260	32.6048	36.9582	33.4762	33.5928	37.4406	36.5397	33.6362	32.5599	32.6695	33.322	33.0674	32.4942	33.0442	33.5697	32.3037	35.2585	92.848	156.344	113.34	51.6427	59.6732	65.9239	150.39	52.2591	45.579	92.7366	185.114	37.8425	126.531	43.6943	56.7488	44.7185
HIT 2261	31.968	35.2175	32.2556	32.8902	37.1217	37.232	33.6868	32.7489	33.5893	34.6807	33.8548	33.5787	32.719	33.6159	32.7533	35.1911	43.3747	44.3883	39.9938	42.0503	43.2594	42.8046	41.1046	38.0934	37.5248	37.6038	40.2368	36.6164	63.1064	43.4679	49.3899	35.8554
HIT 2262	31.7231	37.7642	33.4197	33.1704	35.2383	37.8182	35.7351	32.2304	33.4231	34.0903	33.9722	35.0381	32.92	32.7867	33.2357	36.4322	44.202	42.2777	41.0069	42.2875	37.056	41.2202	40.3168	38.6295	37.4675	37.7463	39.1927	36.7935	56.1144	43.7151	47.6126	35.7782
HIT 2263	33.4163	39.2786	34.9636	35.5276	42.2032	39.1899	37.1444	36.3933	4969.38	48.0248	35.8819	36.388	35.4922	36.9713	35.1723	46.8746	26490	47140.1	4904.32	7954.21	1184.94	8340.7	2429.31	6432.38	8645.4	2102.17	3985.69	10064.2	4886.61	985.496	9603.18	19433.4
HIT 2264	31.7803	36.8477	33.2968	33.2898	37.6051	40.0371	34.1251	32.5245	32.8296	33.3168	33.7573	38.566	33.5958	33.6989	33.0174	36.3983	43.8243	40.8684	38.2369	39.0498	38.6896	38.1122	41.8569	41.5595	35.518	45.8343	41.2626	34.4482	60.1332	40.8566	52.3886	36.9067
HIT 2265	33.0247	37.4054	33.8135	34.8725	37.8797	37.4336	33.8422	33.4262	33.3989	35.1488	33.9181	33.3547	34.1659	34.0757	33.0545	35.1926	63.5011	61.1906	50.1615	46.8085	46.2249	48.6862	44.8531	49.7935	38.0992	38.1429	44.3936	35.1684	64.5839	47.071	53.425	40.1917
HIT 2269	129.273	60.5075	82.6191	49.484	138.118	38.9607	42.1741	101.722	40.7458	59.8548	55.6578	40.1804	37.51	44.0632	36.5786	40.5196	924.295	137.878	99.9031	413.993	4218.09	163.8	66.1278	332.735	99.2061	119.648	590.776	146.686	24672.1	98.8739	138.316	215.671
HIT 227	32.2199	38.0754	33.2411	32.8984	36.8308	37.8735	33.7687	33.5537	33.8344	34.2505	33.2154	34.3996	34.1574	33.6397	33.6491	35.1178	51.6157	47.8807	42.3655	44.1227	40.7998	57.4118	55.6552	47.9023	40.8452	39.708	39.8428	37.3095	59.8194	45.6257	55.5079	38.057
HIT 2270	31.9162	36.2538	33.0031	34.7436	37.0404	37.4782	33.9999	33.5958	33.6859	34.2587	34.7701	32.6751	33.2276	34.8171	33.3441	35.7339	41.627	42.7412	39.3518	44.6462	824.139	39.6151	38.9875	37.9833	38.0556	37.3722	37.1503	52.9561	6011.56	55.7725	55.9183	36.6804
HIT 2271	37.2554	40.8967	34.8041	35.4686	131.988	39.2595	35.2211	34.1223	34.9235	35.3717	35.3618	35.1197	35.3059	35.071	33.8868	37.3963	92.0132	49.503	43.2339	77.1737	7141.66	116.227	43.8389	68.769	48.1994	302.231	107.797	150.162	45905.5	93.3206	111.118	56.2052
HIT 2272	32.129	41.4614	32.9606	33.8681	37.8503	36.7219	34.1347	32.83	33.2751	34.8273	34.5361	33.7436	33.5205	33.5752	33.1759	35.6107	45.9562	41.4574	49.6192	57.0119	254.353	43.1217	40.0613	39.8188	38.9582	37.1395	39.2723	40.2363	952.955	45.3448	73.3558	36.1535
HIT 2273	32.0733	35.9527	33.0599	34.1752	37.3555	36.8775	35.3347	32.7324	33.1817	34.8412	34.4988	33.301	33.3371	33.7773	32.7739	35.3452	43.6247	39.3506	40.0653	39.9962	72.0736	40.9655	39.4599	37.7746	37.4735	36.6975	39.2295	37.9327	252.587	43.5278	52.1472	36.7014
HIT 2276	32.1001	37.7249	33.1072	33.7133	37.3118	36.93	33.2355	32.962	32.605	34.5708	34.5018	32.7336	33.9371	34.4354	33.2865	35.0065	95.2998	70.8536	48.136	43.1332	124.38	47.8498	114.538	41.2089	42.8536	42.343	46.7868	68.4137	60.4725	48.6614	79.2523	49.2046
HIT 228	31.9024	40.3265	33.0066	469.192	36.4322	36.417	33.9499	33.6714	4676.57	2199.54	450.916	36.1542	33.0153	34.8582	35.0867	34.8646	264.299	48.6548	81.9472	40.2313	353.466	57.8078	71.6812	40.8642	64.4344	39.2479	43.7378	35.7332	815.467	41.0429	68.3156	36.9294
HIT 2281	33.1219	38.2562	35.0581	35.1068	39.0994	40.0407	38.4489	124.315	35.7083	38.464	36.7544	37.2228	35.3187	36.8455	35.6599	38.6052	50.8999	48.7383	47.4122	50.9672	53.9458	43.2766	43.7126	47.3011	41.1205	40.3476	102.857	43.4737	93.0917	71.8157	60.6853	50.8997
HIT 2282	32.4064	35.7558	33.2597	33.371	36.7698	36.2247	32.7743	32.8392	33.2898	33.1165	33.8179	32.6957	32.6229	33.2714	32.7703	35.8129	39.1722	36.654	37.3116	40.4431	39.1296	44.2686	38.2927	39.0293	36.7001	35.3988	37.0495	35.2083	55.8751	41.6769	46.6512	36.0688
HIT 2283	31.9698	39.0986	33.4001	34.0956	39.1921	38.6318	33.0872	109.835	33.171	34.844	33.5535	33.6178	34.1258	33.5361	33.0358	35.0286	44.7963	45.4658	44.4764	51.3661	44.8757	42.6061	50.0074	43.5131	37.8062	36.8194	80.6748	36.8495	78.8204	55.8996	56.3248	43.728
HIT 2284	31.8201	35.7292	32.926	33.1551	37.761	36.2335	33.8397	32.6065	33.3541	34.3521	33.4241	33.9772	32.4838	33.3773	34.067	35.6699	45.2852	41.2632	41.3784	41.4503	41.292	40.8352	39.6085	40.109	37.5863	38.8891	42.9729	37.2718	60.4629	43.2746	53.5058	36.2913
HIT 2285	32.6357	39.1513	33.4396	32.8917	36.9343	37.6476	33.3081	32.9052	32.7992	33.2834	33.2259	32.8945	33.3779	33.1007	32.5388	34.8176	44.6973	45.6329	39.379	41.4678	42.1035	39.9832	37.9072	40.9501	36.8559	37.0508	44.2185	37.4687	59.5636	41.5247	51.9963	35.9675
HIT 2286	33.2521	37.9056	33.1779	33.6949	38.4857	38.1613	35.3055	34.2786	33.4888	36.1495	33.7551	34.6668	33.6244	34.6928	33.907	36.6183	46.6301	49.4278	44.9245	45.7403	441.134	43.1199	48.8159	41.6051	57.7631	35.5749	38.8685	42.6416	63.5303	42.4466	307.702	36.3369
HIT 2287	32.9769	38.4077	34.3891	34.8243	42.9762	37.5957	35.4173	35.2435	3502.68	46.3061	36.0403	36.2066	36.3121	36.4956	34.3848	47.7128	56487.6	75820	5062.05	76912.8	1334.82	2441.35	8345.56	37439.4	40505.9	25263.7	873.508	18537.7	15359.1	4718.26	1566.24	28622.4
HIT 2288	32.2085	37.0714	33.3647	33.3868	37.7287	38.0122	33.5256	33.0028	33.0109	33.9961	34.2709	33.8727	33.11	34.5768	33.2008	37.352	12518.9	13747.3	662.953	15456	237.644	61.7454	828.866	5888.65	7237.93	3825.3	69.284	2316.63	2687.07	637.181	98.4457	3713.01
HIT 2289	32.2484	37.1489	32.9574	32.8214	37.0646	36.1207	33.7462	33.31	33.3336	33.9467	33.7275	32.9454	33.5784	33.5821	32.5644	35.9559	2629.92	2955.39	163.842	2653.39	74.2682	51.0028	263.569	1354.47	1300.48	918.051	52.6974	567.003	518.806	143.484	71.0885	790.341
HIT 229	32.6532	45.3516	58.5886	34.8207	37.482	37.3308	35.3723	33.1191	48.5548	22272	2003.98	49.7507	34.5962	37.3553	42.4698	36.0306	5647.35	171.023	16282.6	75.0037	12166.8	4853.06	34447.9	151.534	3760.88	2190.47	4540.52	47.7936	27136.5	254.814	7765.06	3527.27
HIT 2291	32.5118	36.3942	32.408	33.1994	36.0459	37.2573	33.0918	31.995	32.6963	33.2245	33.8442	33.0779	33.605	33.5837	33.6604	36.0334	64.9777	51.4915	42.6718	57.3231	42.0071	38.0648	43.8863	52.8723	43.5397	41.1144	38.1606	36.6312	55.0164	42.1657	46.8341	44.605
HIT 2293	32.5472	38.9277	33.3187	34.3991	37.7957	37.5017	37.5181	34.0909	38.4034	36.4894	34.4083	34.8965	34.0359	34.0897	34.1774	37.633	1162.84	207.861	305.167	95.2036	119.462	480.268	123.261	255.039	104.397	79.616	244.3	28547.5	105.9	59.755	105.544	1027.88
HIT 2294	32.0255	37.5329	33.4429	34.3265	36.4507	36.2273	33.7843	32.8528	32.9087	33.5352	34.2044	33.4557	32.6904	33.9404	33.8329	35.3867	85.5158	46.5615	52.2989	235.628	53.6509	1283.46	65.3262	1379.73	182.591	39.7862	42.076	902.991	65.6082	49.8562	54.8531	8528.88
HIT 2295	31.8204	35.7685	32.4481	33.6225	37.3202	35.6912	33.6236	32.3753	32.3288	33.2826	34.4825	33.0025	33.2335	33.6117	33.4587	36.0996	494.71	43.2519	40.4727	318.109	42.8467	756.739	56.3221	966.457	66.5882	36.9315	38.1851	268.771	58.7065	51.8901	56.7113	4347.34
HIT 2296	36.3596	50.8379	49.5128	36.1781	71.0344	44.7095	37.0172	34.0349	34.2048	33.6277	33.7986	34.4584	219.431	33.4795	33.7696	38.8707	1302.77	838.521	969.646	1305.66	456.914	1814.14	501.254	371.888	1083.36	265.375	234.317	2469.99	118.713	108.629	1001.66	1810.45
HIT 2297	32.2224	35.8906	32.9759	35.7933	36.1597	38.5863	35.3011	35.6992	34.0713	40.223	35.2424	38.4148	34.4879	34.9673	36.7307	35.8671	45.7239	39.9131	40.4273	40.857	39.2704	39.8685	38.4515	36.6248	36.0789	37.3024	37.4274	67.273	61.5301	58.1998	65.515	36.1163
HIT 2298	31.9951	36.697	32.7822	34.1326	37.5521	37.7387	34.019	33.4583	36.5467	33.899	34.3268	33.2348	35.7707	34.5434	33.9343	35.6523	2273.82	199.293	2045.9	2843.86	937.704	4621.66	57.3671	790.917	2349.12	45.6934	127.751	8253.72	82.4128	47.1841	3252.58	4993.33
HIT 2299	32.3281	36.391	33.5823	33.6213	38.2484	37.3112	33.2439	32.4026	33.133	33.5125	33.3643	33.426	32.9297	33.2091	32.6726	35.2711	47.7337	42.3348	41.7386	42.5772	42.9745	51.5253	168.152	46.312	37.4026	37.1148	39.9266	36.935	59.676	47.0689	52.5711	37.2706
HIT 23	31.8947	38.802	33.0057	33.2569	37.6633	37.0501	33.2436	32.9511	33.1551	33.3727	34.5614	33.8438	33.0302	33.9097	32.741	35.3381	43.6267	40.5522	40.929	41.1999	40.3876	38.8949	41.7261	39.6783	36.5085	37.6846	38.7712	36.5779	54.5498	43.0741	53.7658	36.1285
HIT 2300	31.7431	37.3951	33.2556	33.5002	42.6155	46.8934	33.2629	32.8878	33.0801	33.5302	34.1651	33.927	37.7687	32.992	32.6109	35.7788	41.0729	39.5788	37.702	41.6871	42.7887	39.8885	46.3494	39.5801	52.9158	37.2267	40.2561	36.0571	69.6285	41.3252	52.4385	35.5933
HIT 2301	32.7981	42.6905	79.5491	34.8473	60.379	82.6335	34.8987	34.7944	33.7563	35.9227	35.2112	39.5432	220.588	34.7106	34.4145	43.6688	1766.38	95.4804	58.5073	90.8253	132.316	355.56	717.267	3673.66	398.574	72.0967	100.1	40.0358	98.6563	45.9797	117.77	54.7117
HIT 2302	32.4523	36.0151	33.3848	33.0389	37.0418	36.1099	33.6276	32.6116	32.7851	33.4608	33.8321	33.381	32.4826	32.5779	33.0546	35.1758	43.7608	45.8637	39.4853	40.8377	40.4825	42.5948	38.9924	41.221	37.3427	38.0176	43.0662	38.4199	62.0847	43.2142	52.3822	36.3435
HIT 2303	31.3954	36.9769	32.8069	33.8031	37.8644	37.6415	32.8348	32.5208	33.4752	34.0096	33.8759	32.9735	33.3789	33.5008	33.095	34.5886	44.1516	41.2042	39.2362	39.0973	42.3684	38.8572	38.7712	39.3698	36.6101	36.6851	39.7312	35.4523	56.0879	41.445	51.4357	35.489
HIT 2304	32.2577	37.8607	32.4123	33.1226	37.0815	35.8131	33.6552	33.2405	33.2614	33.1597	33.8705	33.4562	33.4369	33.3508	32.9505	35.6223	50.9173	38.8758	40.1413	40.7225	41.7184	43.9279	41.5176	49.6391	36.3735	36.3389	38.8723	35.7378	84.3815	42.7468	50.6599	36.2743
HIT 2305	32.3382	37.3125	32.9907	33.5813	59.7948	37.0464	33.3831	35.7323	33.1938	33.5532	33.8213	33.3839	33.3936	33.1713	32.7958	34.9845	48.5341	44.9395	42.3593	46.4007	48.8078	45.443	45.0375	42.8653	37.7226	38.8795	47.273	37.3319	65.5055	44.9349	53.4659	38.2207
HIT 2306	33.3784	35.0015	34.1922	34.5474	39.3782	39.0178	34.1528	34.0458	34.5501	36.0843	34.5529	33.8822	34.6453	35.4348	34.846	37.1222	58.593	52.8324	47.3212	44.5213	44.7675	46.6518	45.7962	47.9857	42.6699	39.5226	45.5755	37.7504	67.9557	48.1554	56.3592	35.6822
HIT 2307	44.9992	73.8299	56.0765	123.412	61.5651	50.9819	713.63	5380.66	1667.2	4037.04	1840.23	259.243	481.746	4034.43	1000.75	56.1106	483.56	128.583	232.953	2185.72	160.632	190.645	105.431	180.492	80.6852	75.9199	3416.4	132.359	3048.65	2193.22	735.707	180.869
HIT 2308	32.2053	36.6393	33.1092	33.3314	38.6148	38.9894	32.7896	32.3695	33.4428	33.5303	34.2434	32.4297	33.3656	34.5754	33.0191	36.0581	52.2353	49.0632	45.4558	47.2426	45.5952	39.3957	40.6905	47.5858	37.7473	36.7451	39.9967	35.7822	52.3853	44.873	48.8507	36.704
HIT 2309	32.0054	35.8266	33.9903	33.1455	38.3697	36.7089	32.6482	32.0792	33.3589	33.6572	33.2695	33.5847	33.032	33.8245	33.8359	34.4989	41.9837	41.142	39.3673	40.1857	38.4106	39.15	42.4366	38.7139	34.8608	39.4729	39.4505	36.3915	62.5408	46.2448	50.6785	35.4104
HIT 231	32.3568	40.2862	34.5044	34.6429	37.7086	36.6857	34.2276	32.4948	37.7741	2304.05	241.409	36.1454	33.3776	34.9112	35.7241	37.0802	429.051	56.2209	1159.74	46.0299	913.495	444.132	3034.42	52.3086	553.759	221.691	369.047	38.7616	2277.44	61.6148	585.904	834.052
HIT 2310	32.4557	38.3649	33.1433	34.1219	37.9902	35.9248	33.8774	34.0024	34.49	33.5627	34.3218	32.6956	33.9089	34.1089	32.8076	35.4451	45.5945	43.6695	42.0091	42.5511	40.1833	39.2008	38.8099	38.6539	37.1593	36.0182	38.5575	35.8318	59.479	44.3992	54.7615	35.9425
HIT 2311	32.3711	38.3543	33.4824	33.209	37.3661	38.4303	33.8676	33.718	245.896	36.8346	34.2483	34.4126	33.4308	35.2525	34.2572	39.2679	1713.21	33261.5	264.597	147.929	509.399	2242.52	120.792	199.497	310.096	567.486	92.4111	538.81	131.408	774.021	138.65	237.486
HIT 2312	31.8271	34.8822	32.2297	33.5344	36.299	37.7358	33.2658	32.8578	34.1494	34.7352	33.8279	32.9516	33.4084	33.5503	32.9647	35.3107	136.579	37.9589	38.9492	39.5625	65.496	49.5646	46.6981	40.6664	35.7053	96.1368	39.8059	37.4701	57.7552	41.9289	49.1588	36.2713
HIT 2313	32.3271	36.0101	32.9822	33.7105	36.8947	37.1512	33.6323	33.0709	33.4223	33.3039	33.9476	33.2776	33.0529	33.0419	33.2356	34.409	416.526	69.8297	39.4577	41.4892	182.426	53.8781	42.1568	39.6742	37.8143	325.647	39.3383	35.7677	61.3854	42.2698	52.8582	37.8892
HIT 2314	41.0112	44.7361	36.4477	35.9366	40.5535	39.7644	37.8383	34.8247	136.88	38.3217	36.7844	35.8189	35.1499	36.291	34.4966	38.7056	953.007	1993.73	1938.57	278.259	314.135	721.047	982.86	782.774	415.759	2430.94	1792.85	1119.26	986.808	266.462	516.518	1416.53
HIT 2315	32.098	36.7294	33.0196	33.902	36.4077	37.2994	33.8707	32.7644	33.9454	33.2497	33.4274	33.0334	33.3251	33.308	34.3008	34.6738	53.3341	62.2792	40.3644	42.9143	46.056	50.51	39.5921	37.8481	39.5648	43.6216	37.9279	37.3162	56.9621	47.0205	54.5409	37.0648
HIT 2316	32.0832	36.0613	32.727	33.3695	38.3961	39.94	33.5006	33.3687	33.4208	33.8652	33.4161	34.2588	33.9857	33.4212	33.3589	35.4309	120.73	456.685	69.2807	69.9047	92.9925	121.389	62.5984	52.5806	43.1093	255.911	77.6743	58.9567	131.991	58.568	70.7447	61.4631
HIT 232	34.38	43.5157	47.9987	37.3583	46.2077	48.8561	35.7665	36.4166	341.489	6927.15	572.788	73.2544	37.3476	35.7688	47.2619	41.5965	62.8949	53.5242	58.4841	43.1561	72.0666	48.9322	87.1669	43.814	40.694	43.4547	45.7737	37.396	447.008	55.178	65.7931	196.667
HIT 2320	32.6971	38.0775	33.041	33.7698	38.2503	36.8916	33.1395	33.1462	33.462	34.3766	33.4352	32.6289	32.9037	34.005	33.2636	35.5514	46.8515	41.4403	40.4564	40.4128	42.148	44.1516	40.8794	43.1805	37.792	36.9198	40.0499	35.7359	58.3042	43.6719	58.3185	35.1039
HIT 2329	32.1867	37.9225	33.7168	34.2761	37.796	39.0721	33.5077	32.8363	33.4757	35.0394	33.7288	33.575	34.0558	33.6416	33.1054	37.3187	2960.84	1899.96	779.258	248.194	57.2488	347.552	1119.11	808.142	324.308	661.514	527.621	1019.77	1317.61	874.759	12560.6	9585.69
HIT 233	32.162	37.6902	33.2847	32.9711	38.0564	36.6621	33.5205	32.7721	32.8574	159.915	45.7291	33.204	33.1971	34.0173	33.4675	35.4767	44.0935	39.3421	39.3004	38.8998	40.606	36.0769	39.1733	37.6142	36.4027	36.1923	39.1879	35.287	61.3959	47.2349	54.9478	36.6675
HIT 2330	33.0414	37.6534	33.7626	34.0967	39.8225	36.9008	33.6315	33.1173	33.121	33.9774	36.1637	33.5806	35.2872	33.4085	33.3545	41.326	47653.8	38990.9	29244	6366.69	197.241	11407.6	28052.2	23032.1	5167.8	19251.3	18692.3	15465.9	10550.2	23935.7	73587.3	77430.3
HIT 2332	31.8358	37.5556	33.2494	32.7504	39.5803	38.6692	33.3329	32.8789	33.8411	34.4508	33.1388	33.9507	33.3254	33.1515	34.3075	35.4484	529.77	73.6661	119.922	51.7634	43.5731	73.5507	85.6159	119.473	91.842	96.7712	59.8521	89.6702	72.1755	71.6461	276.676	185.254
HIT 2333	35.749	56.2026	44.5435	35.4899	338.296	582.582	39.3599	35.0511	35.3188	37.2515	34.7221	40.003	87.3735	34.1505	34.4266	38.0711	17071.5	3143.04	9448.24	1321.53	203.279	2833.15	4734.91	3855.48	3189.84	4053.6	2561.48	3260.78	1170.45	2837.38	24966.6	14361.2
HIT 2334	47.2947	117.037	125.158	43.9637	139.102	224.38	56.8331	41.9663	33.9843	45.4949	40.0538	46.709	270.209	34.235	36.5309	52.0922	11163.6	12181.1	9383.48	4740.47	992.558	5751.82	15505.5	10671.3	5512	10916.6	6729.98	13674.6	6101.13	2865.91	9674.3	21610.4
HIT 2338	31.9518	38.0064	33.6864	33.4896	37.4953	36.0056	33.7714	32.7585	32.6681	33.7819	33.3367	33.0788	33.1099	33.5045	32.3065	35.8518	43.4397	42.6768	39.9174	41.283	193.253	57.6273	41.8868	49.3031	39.5386	37.6613	39.5702	35.5084	2818.88	47.497	65.4463	446.697
HIT 2339	32.0693	37.8063	32.8358	33.585	36.7433	37.0951	33.8426	32.4266	33.0277	33.5828	34.1273	33.0401	33.0171	33.4496	33.7793	34.8086	39.2289	41.1378	40.1068	39.1316	323.628	46.9545	40.5335	40.6442	36.9808	36.9695	39.5428	36.6354	9039.54	49.1699	52.9623	193.92
HIT 234	32.5496	40.9386	36.2246	33.5209	44.1713	36.4932	33.5307	32.5571	37.3678	7135.65	688.321	39.7876	36.6416	34.6552	35.6611	35.2838	60.1487	61.8258	52.3662	45.6255	69.4396	55.9237	76.9337	46.2736	49.3538	48.2027	50.4091	42.6605	202.97	41.5156	59.7688	131.739
HIT 2346	32.4154	36.476	33.3419	34.3901	38.3319	36.5269	34.4311	33.4229	33.183	35.6735	40.4525	33.6647	33.7212	34.7702	34.641	36.52	43.9132	40.6654	41.6611	39.8314	43.5684	67.2173	40.4503	39.8083	39.4045	37.5999	39.2932	37.4022	125.694	46.7995	53.6203	41.2872
HIT 235	32.4374	37.6476	33.322	33.5684	37.7057	38.4514	33.3876	32.9445	34.9706	34.5006	33.2066	34.0763	33.0813	32.7922	33.0752	36.4408	42.4631	42.3018	42.1867	41.6238	41.2756	44.7119	40.8619	39.324	36.3653	37.3315	39.0935	35.521	58.4548	42.2642	52.3332	36.3901
HIT 2350	31.591	35.9673	32.0998	32.9959	38.8652	35.895	34.0714	32.7005	32.8084	33.5351	32.9726	33.8022	33.3589	33.1541	33.3327	35.6348	60.8187	52.0643	403.596	250.271	304.12	51.4034	746.391	106.096	160.382	382.223	1166.25	39.8086	65.5738	45.6207	1122.8	289.523
HIT 2351	32.3417	37.1456	33.704	33.8586	39.3134	36.7307	33.4099	32.8712	33.3194	34.2276	33.9051	33.0795	33.2434	33.7012	33.2851	35.6966	54.8233	52.7779	45.6301	44.7874	44.4132	47.3463	52.2876	52.3122	40.5403	51.8882	44.5206	43.9709	64.0187	44.0134	56.9511	47.3089
HIT 2352	32.073	34.9893	32.8048	33.7665	37.2034	36.5547	32.6438	32.8125	32.9253	34.1219	33.2611	32.9941	33.9703	33.6366	32.4549	36.491	75.4525	83.4908	369.137	101.511	63.0868	53.4127	109.314	56.961	50.5779	67.8883	1001.65	47.2579	68.9508	48.2496	942.31	73.1026
HIT 2356	58.5196	52.0119	47.4208	37.8554	264.728	468.931	36.951	38.3263	36.641	38.6879	34.6018	52.3506	58.6992	33.7381	35.9881	39.8505	495.307	93.0014	6581.02	59.5667	358.979	67.88	124.122	42.5759	56.3179	69.5123	51.3889	35.7843	1243.99	47.7964	70.1734	59.1321
HIT 2357	36.0233	38.0121	62.1089	36.6465	35.5712	37.1932	34.4467	32.9185	34.0576	33.8344	33.7944	33.1949	33.7888	33.3029	33.4188	34.4564	43.5445	43.8425	39.129	41.7776	40.2353	40.9602	38.6277	39.1618	36.0983	36.4696	37.4025	35.8301	54.6257	40.8525	51.6659	34.741
HIT 2358	117.099	44.3435	86.1116	42.9358	42.0104	37.0877	42.653	36.5911	34.2302	65.836	34.0167	63.8117	41.9028	33.7529	34.8485	55.8221	56.5091	55.253	5388.54	56.8889	45.3163	51.4253	54.0177	54.6314	44.7066	45.1004	39.2209	39.9224	86.7198	67.8302	55.2623	43.2634
HIT 236	32.3954	40.007	32.608	33.4952	38.8814	37.7359	33.3261	33.4691	33.3161	33.8891	34.6005	32.6813	33.4831	34.5237	32.6133	35.4807	56.8734	54.8964	48.8354	45.2474	48.7315	67.0539	44.3653	44.0733	38.8399	39.7841	42.2029	46.0424	61.9617	48.2795	49.9718	49.6522
HIT 2363	35.9587	44.1288	36.9273	40.612	44.4564	39.7986	38.5234	35.564	35.5902	37.3681	37.0317	38.7858	35.0973	36.2923	35.7256	42.7097	48.1539	44.3021	43.6538	44.3656	43.6786	47.1595	44.3487	40.8444	40.2173	37.4019	38.9489	37.6164	255.372	45.202	52.6264	37.478
HIT 2364	505.18	58.5369	53.2513	83.5793	166.369	40.0709	40.2178	32.7591	33.8173	33.7183	34.4511	33.0791	33.42	33.0989	33.0332	35.7193	54.6511	48.526	46.563	39.9811	42.4263	68.6827	48.7287	40.0826	37.7328	45.794	38.6161	36.3329	61.4876	40.6391	52.531	82.9947
HIT 2368	32.5769	37.393	33.4362	35.878	41.6758	37.247	34.2527	32.6319	33.0025	36.6907	34.193	33.6687	34.6419	34.1514	34.7297	36.7571	1767.18	2222.06	763.321	127.828	281.46	248.348	944.453	1031.3	389.789	819.287	269.512	154.114	16402.8	334.433	1265	183.178
HIT 2369	32.268	36.0122	33.0538	32.856	37.1393	36.5417	33.0078	32.3053	33.141	33.5815	33.5279	33.4736	33.6586	32.8423	32.7698	34.8981	43.1487	40.8746	40.8635	41.2957	40.7709	41.2994	41.547	41.0535	37.0962	36.4417	39.2215	36.2532	58.8447	42.4898	53.6355	35.0549
HIT 237	32.4889	36.67	33.7501	33.6435	38.4089	37.6895	34.2495	33.511	33.6812	33.9413	33.8712	34.1067	34.1436	34.5527	34.1195	36.1125	40.6191	40.2862	41.0132	42.4369	39.7212	42.4416	40.7905	39.4153	36.5856	37.3707	39.3924	36.3596	56.1758	41.793	53.6974	36.2673
HIT 2371	32.293	35.8721	33.43	34.6001	38.8557	40.3008	33.8323	34.7414	34.4089	34.4936	35.5733	32.859	33.7725	34.9099	33.5742	37.6688	52.4449	38.8634	39.9038	39.5987	36.361	42.9639	50.4463	472.896	69.604	40.51	41.1453	38.3503	67.0762	43.6212	2510.18	36.114
HIT 2372	31.9893	40.5929	33.189	33.3269	36.2371	36.6063	33.1403	32.8987	32.9161	34.8625	34.4064	32.7844	33.9561	32.5461	32.9312	33.9272	39.7767	35.5689	39.6109	40.8484	38.3065	39.3047	41.4953	55.8583	37.5296	36.5659	37.9641	35.7719	59.7024	42.8056	141.854	36.5647
HIT 2373	31.7592	35.1415	32.1726	33.5415	35.8054	36.2782	32.3521	32.9765	32.1752	33.7432	34.0728	33.1338	32.6499	33.438	33.358	34.1978	44.2824	41.2883	44.0174	48.6966	40.8107	40.7917	42.6416	133.113	45.1939	37.7963	38.2638	37.9344	68.2077	44.3529	618.744	37.4007
HIT 2374	32.8639	36.9916	34.0308	33.9137	37.1701	37.1292	32.9772	32.8483	37.2771	36.4874	34.1762	36.6061	34.0116	33.352	33.1956	35.6585	55.447	40.559	46.4935	42.4317	98.2092	47.7248	49.0489	85.2016	39.7545	37.3189	39.8075	35.7413	71.453	42.4623	192.893	37.3326
HIT 2375	32.2084	37.3136	32.8866	34.2837	46.1217	51.1523	34.5289	33.0541	33.2014	35.6902	33.9961	35.9148	35.6734	33.9181	33.3046	33.8289	45.2239	42.0652	47.2636	43.4482	43.2221	41.2308	40.5768	136.558	41.068	36.0964	41.0761	37.889	65.2973	43.7538	53.6131	36.2241
HIT 2376	32.3876	37.38	33.1728	34.2631	38.1099	36.4896	33.3767	32.6975	32.5335	34.2686	33.5465	33.5855	33.2083	33.2588	32.9854	35.114	44.7812	39.9978	40.0607	41.3451	41.0431	44.0099	40.7319	872.637	94.1199	36.7493	38.117	39.4573	63.0307	44.357	2105.04	35.5168
HIT 238	33.4118	40.3003	42.2395	34.4995	38.4805	39.1071	34.2617	32.9736	106.23	34.9444	33.8221	33.63	33.5162	33.6264	33.7738	36.6534	252.871	591.211	1364.06	164.061	66.3977	165.518	421.683	340.055	148.013	259.194	1407.09	363.906	200.424	107.045	206.544	628.632
HIT 2380	31.8939	34.5056	32.4935	33.8082	36.6006	37.0103	32.9171	32.4094	35.5132	34.3422	33.8618	33.4418	32.9239	33.308	33.5842	35.8436	459.971	41.6597	40.5844	40.4191	40.994	42.2309	42.1777	39.3026	37.7077	168.771	79.9987	37.0324	128.4	52.8398	50.533	37.8874
HIT 2381	31.9409	36.8451	32.73	32.8349	36.8838	37.8615	33.5008	32.6276	32.8979	32.7744	33.779	32.7857	32.9559	33.6467	32.6836	35.6768	41.9457	39.1431	41.6424	41.9921	39.7431	40.8969	42.0931	39.0169	36.4453	35.6426	37.4491	37.4088	58.2809	42.9077	54.4142	36.9414
HIT 2382	32.1679	36.4298	31.994	33.031	36.9487	36.1265	32.9018	33.041	33.1546	34.1535	33.8217	32.78	33.0969	33.8972	32.4662	34.8029	50.9286	40.3382	41.3678	43.4019	38.0015	41.6099	45.5524	40.5053	36.9312	36.0137	40.8546	36.5928	61.4462	44.562	52.1081	35.7741
HIT 2383	32.2235	36.6953	33.495	50.8608	40.1759	39.5254	33.768	33.3375	34.2018	55.7551	55.1658	34.9325	33.52	42.8597	33.3496	40.948	1499.62	761.78	220.119	130.442	50.476	44.253	44.0075	1900.56	510.392	41.5856	45.2469	96.8876	791.892	91.4377	334.741	60.3093
HIT 2384	32.0451	36.0492	32.7655	34.4483	36.8902	36.5856	32.9928	32.8711	33.1539	34.7215	35.8927	33.0693	32.7909	33.3563	32.5729	34.3932	97.9878	67.7546	46.8844	44.8727	40.7745	41.4074	37.985	95.6556	52.3923	37.3834	37.1434	37.1045	82.8126	41.5398	61.4881	37.4493
HIT 2385	32.2154	36.0741	32.4513	33.1173	36.7801	36.6446	33.7884	32.5787	33.4489	33.5357	33.3698	33.8995	33.2247	33.0579	33.0919	36.437	75.9663	58.7926	43.6544	40.5612	39.246	40.0341	37.8765	73.7293	50.0465	36.3703	37.5862	35.3053	72.1097	40.4471	55.8134	36.2574
HIT 2386	32.1457	38.5192	33.3109	35.4548	38.4523	38.1678	34.2111	33.3928	33.4277	34.0837	34.4183	34.0336	34.0887	34.3633	33.9134	37.3066	5618.28	2441.11	751.447	271.182	140.925	46.1743	68.6736	4266.97	1694.01	37.7281	40.7403	37.1389	2355.96	996.347	955.568	8800.59
HIT 2387	32.3545	37.2903	33.1071	34.0488	36.6674	37.9246	33.8407	33.148	33.8148	34.0462	34.7994	34.4141	33.8005	33.4767	33.2377	37.4713	2846.3	1170.24	391.659	158.23	91.0285	44.6832	205.902	2308.69	829.033	47.5791	78.1218	72.6464	1019.68	672.184	525.309	3890.25
HIT 2388	49.7985	40.5501	42.0908	35.2203	38.0825	38.0428	35.8095	33.6102	36.1609	41.8222	34.5306	44.4164	38.5284	33.5568	33.9199	46.2768	1897.66	873.582	311.84	142.129	89.8368	114.269	56.2435	1645.38	747.734	46.1895	49.6223	36.4896	941.028	460.412	325.203	3646.82
HIT 239	32.4168	36.5389	33.5463	33.7214	36.7786	35.9791	32.7497	35.2301	32.9308	33.8692	33.5176	33.4199	33.3501	32.4712	33.3641	35.4074	43.6229	38.3846	39.2694	40.1123	40.4732	41.8722	40.8436	37.7455	38.2505	39.3372	39.1013	35.757	55.8451	43.4827	56.8598	36.7792
HIT 2392	54.3319	206.129	630.325	63.7286	2126.31	3482.76	52.3838	377.923	124.724	312.662	111.928	1851.35	539.753	52.9959	353.163	347.407	18024.2	11525.7	27111.8	326.076	42141.4	10132.6	47533.9	579.246	10156.7	20170.9	7054.88	264.666	100355	637.18	11150.4	9270.38
HIT 2393	31.7643	37.5053	32.4062	33.1669	37.0186	36.5565	34.4229	32.4143	32.975	34.1183	33.7382	32.9263	34.2061	33.3589	32.7849	35.5619	267.117	178.405	501.6	44.3587	527.786	213.776	713.296	43.5534	238.146	277.493	193.966	37.8172	1466.47	49.2282	196.742	451.305
HIT 2394	32.3547	38.1459	37.8601	32.9201	39.796	41.8267	32.7673	33.4481	32.4852	34.4917	34.2208	37.1785	33.716	33.8111	34.1071	41.2523	5102.39	3537.53	7974.39	67.311	13440.6	3021.37	12307.1	63.6846	3551.41	6236.79	2381.21	38.7096	29243.2	186.475	3067.9	5393.15
HIT 2398	31.9314	36.6898	32.9232	34.2061	36.9611	36.9582	33.334	33.9951	33.9481	34.3618	33.4004	34.1843	33.2553	33.1012	32.8999	35.0822	44.2211	40.1644	40.2574	41.4066	44.2995	253.054	40.6793	39.4271	36.7572	37.1388	41.2611	36.877	60.5063	42.1305	49.1965	35.2885
HIT 2399	32.5779	36.4835	32.7311	33.5983	36.4589	36.8742	33.4447	32.402	32.9434	32.9386	32.9867	33.1977	33.2083	33.3853	33.5969	36.2693	41.9308	38.7168	39.0159	40.9549	39.9275	68.058	94.1928	41.2995	37.8102	35.825	38.6659	41.2284	59.4009	41.4446	54.3116	37.0341
HIT 24	32.5312	37.044	33.4454	33.5434	46.597	36.9957	32.9462	63.1919	32.9393	34.527	33.7003	33.234	33.5997	33.6066	33.4749	35.1462	107.255	76.0233	40.9596	44.6141	136.184	52.6586	42.7677	2479.21	40.0225	51.3472	601.379	38.595	74.9615	49.3152	59.2667	478.688
HIT 2400	63.4063	67.9706	81.0299	93.3185	43.8826	35.83	540.393	306.902	84.5823	297.216	135.877	257.866	275.194	322.373	182.379	205.927	343.443	76.1408	95.9389	205.885	115.416	163.937	115.299	50.1873	165.361	60.1761	46.3954	56.2968	233.892	72.298	82.6788	63.8158
HIT 2411	31.8837	37.009	33.8631	33.2963	36.2531	36.7891	34.5506	32.191	32.917	33.5708	34.2842	33.5319	33.6163	34.0894	33.6184	37.9019	22085.7	65.7288	37.868	41.175	71.842	39.8761	49.1605	69.5501	90.9744	5246.5	1688.38	37.1731	4172.37	722.078	52.8967	127.529
HIT 2412	33.2094	37.7073	34.3241	33.8227	37.1394	34.9354	32.7305	33.6852	563.771	89.746	34.3379	68.0966	34.9472	33.4796	40.4123	36.7909	14945.7	64.0595	42.1274	46.8747	81.1775	74.8895	197.359	80.7631	103.548	4240.6	1527.11	38.6076	3645.27	719.135	52.0338	141.237
HIT 2417	32.2851	39.5204	32.729	34.4587	38.3081	38.7763	34.6847	32.6837	33.8033	33.9178	33.6901	33.1448	32.2545	34.0207	33.4621	35.9245	45.3821	41.8229	36.3855	41.1521	40.1479	37.7938	40.2674	47.2997	37.6381	38.501	35.8717	36.0619	57.4177	41.0921	50.1077	35.1462
HIT 2418	54.4935	61.5298	102.624	42.6927	67.8734	38.6008	67.2787	57.9956	35.1402	46.0065	36.7432	78.6629	24099	36.6629	50.42	92.3395	4694.99	6328.99	4762.08	13578.8	6744.37	1434.5	20525.6	1919.14	35034.1	3187.1	422.338	2428.23	636.401	408.241	3881.19	1341.45
HIT 2422	33.0188	38.234	33.7947	35.0546	37.5044	37.7514	33.9265	32.5463	33.9434	35.3501	35.6313	33.8079	35.5606	34.0463	32.8319	36.2947	46.8538	41.1549	41.7336	42.3956	46.9215	56.1458	43.4974	38.8464	38.5738	38.559	39.79	38.7142	64.5014	41.8034	57.891	36.4842
HIT 2423	32.344	38.788	32.9863	33.4801	37.001	37.5596	34.1035	32.9327	32.9811	33.7893	34.0199	33.5143	33.6809	33.918	33.3842	35.7534	53.1863	59.3815	54.8658	48.9197	54.1895	39.6679	43.2655	43.9866	38.0429	42.0962	44.3636	220.026	62.1201	85.1236	55.5407	36.3285
HIT 2424	32.2645	37.9134	32.5515	34.1957	35.9239	36.816	32.5931	32.7205	33.1963	33.8006	33.7926	32.8137	33.3078	34.0348	32.822	34.5762	42.0931	37.8412	39.1119	39.1559	39.2195	38.7947	38.9714	38.866	36.6745	37.337	39.1652	34.883	62.0596	42.6075	51.6768	36.9513
HIT 2429	32.2594	36.5755	32.4774	36.221	36.5098	36.1393	34.4578	32.3413	32.9732	34.8534	34.2145	32.6457	32.1739	33.7295	32.3953	34.6205	46.9921	55.5479	40.1287	41.4417	41.5508	45.4516	46.276	37.6229	37.6453	39.1913	39.4736	36.7798	60.5499	41.0091	50.7087	34.8049
HIT 244	32.5586	36.9593	33.2918	33.5374	44.6427	53.4707	34.1385	32.8969	33.3983	33.9913	33.8821	33.2356	33.8296	33.448	33.1712	36.1902	56.2779	38.7873	166.017	42.2789	50.1757	42.5672	42.26	39.9249	38.182	36.2825	39.866	37.5811	85.6866	41.8516	51.3723	35.7257
HIT 2440	32.1157	37.2535	33.2378	33.9467	37.4613	37.0813	33.6507	33.3917	33.6158	34.0331	33.8299	33.4759	34.7987	33.7917	33.1904	35.4316	14602.6	64.4029	41.4787	42.6408	38.9707	40.8658	63.4053	403.846	151.937	18521.6	79.9358	36.2168	63.3271	41.8869	567.333	13529.5
HIT 2441	32.1173	37.6758	32.9211	33.9183	35.4023	38.0181	33.539	32.9192	33.3483	33.6987	34.1108	33.2449	33.2205	33.6557	33.624	34.8903	7977.98	52.1378	39.9111	38.8225	40.5573	41.418	50.5484	238.909	82.8675	7602.95	60.854	35.5555	60.4606	42.3593	345.691	6386.43
HIT 2442	32.1047	36.1939	33.0541	32.9301	46.16	36.9511	33.277	81.131	33.4159	34.0631	33.7366	33.1316	33.5346	33.852	33.3542	34.9784	8836.05	50.6997	42.3331	47.3691	55.6267	43.5558	48.3694	291.987	98.7817	12633.5	114.787	36.2588	76.7821	49.9108	499.681	10180.7
HIT 2446	35.2046	52.7109	51.2819	36.0571	69.6277	40.9888	37.5181	33.8914	33.9557	34.4457	34.3124	33.9234	248.864	33.6001	33.4549	39.0607	2028.54	1331.72	1343.44	1644.19	624.012	2704.07	685.28	551.828	1448.31	418.799	271.876	4224.08	136.048	145.139	1527.68	3101.64
HIT 2447	32.2396	37.8291	33.2214	33.0865	36.1073	36.691	33.5675	32.265	34.2109	34.0624	33.8545	33.2723	33.3562	33.1597	33.1052	34.9968	79.7084	57.4486	68.5209	71.8054	85.895	216.586	49.3287	68.4147	95.7043	36.2084	39.444	112.544	59.5977	41.4374	146.961	166.96
HIT 245	32.2064	36.7962	32.7393	33.5098	37.149	35.7714	32.8436	33.0994	32.615	33.6015	33.5114	54.3664	32.7399	33.6109	33.7577	34.8085	118.498	60.6532	68.8209	43.0331	479.553	52.3953	174.215	41.7828	188.005	40.5157	49.6085	36.4995	518.635	42.1974	131.842	50.7833
HIT 246	31.9824	36.2576	32.7702	34.8877	37.936	37.0291	33.1476	32.7376	36.8222	34.657	33.4543	35.2499	34.4571	33.0783	32.5355	34.8917	463.047	48.4926	54.6649	42.1901	522.533	73.1998	73.6934	41.5148	50.1937	38.6178	41.8156	35.1009	953.712	42.6699	69.3926	36.8014
HIT 2463	32.5707	38.2636	33.3845	34.5365	37.4624	38.9726	33.3793	33.9034	34.1567	33.2139	34.1864	42.4952	33.8611	33.2404	32.3253	35.8789	87.4912	227.75	108.492	107.275	47.4144	162.951	62.9986	123.514	38.3522	79.1712	40.6302	97.927	58.2816	173.474	50.1791	38.8433
HIT 2464	32.2311	36.9803	32.5518	34.0162	37.6775	35.3374	34.2912	32.82	32.9835	34.0085	34.1942	33.7039	32.6927	33.7276	32.8325	35.327	149.628	189.465	64.2856	63.9818	43.2014	121.277	85.3904	40.1502	36.8556	36.9983	37.9077	38.5361	65.7608	45.5505	57.9089	36.7572
HIT 2466	32.9117	36.8427	33.933	33.4425	37.3638	35.8335	33.0557	32.5718	33.4463	33.5285	33.5905	34.1552	35.6515	33.392	33.3951	34.2711	787.22	1053.95	202.571	225.922	45.1802	875.195	340.276	147.414	42.0873	147.587	42.545	97.5646	65.3126	46.5477	111.01	39.3062
HIT 247	35.0757	46.2672	38.6829	38.6958	54.1629	67.7207	37.0289	36.844	42.3587	45.6277	36.8444	48.1649	42.1394	36.7667	36.688	49.3969	68.0464	59.5042	62.1825	55.9936	55.1145	68.2364	70.4879	57.201	47.7437	41.8196	44.3478	41.1899	64.1124	45.1649	52.1917	43.2977
HIT 2477	32.0381	36.237	33.0114	32.9929	36.4924	36.0322	33.637	32.3868	32.7765	32.8837	33.9814	32.5888	33.6511	34.2174	32.2905	35.296	46.3796	42.5543	44.7703	39.9407	36.691	43.2619	41.0381	42.6033	37.2741	35.2533	38.4994	37.1906	57.7217	41.1414	51.07	36.4627
HIT 2478	32.725	36.2443	32.4668	33.0881	47.2464	37.4778	33.2069	58.7128	32.4734	34.5643	34.3985	33.1105	32.6352	34.257	33.3618	35.3585	98.1832	71.2211	38.5385	43.9298	122.38	48.5392	46.0395	3479.29	39.7129	51.7299	557.624	37.9003	64.0224	46.9998	59.1267	685.99
HIT 2479	32.3459	34.9068	33.0953	34.3139	36.4804	37.3137	34.7063	33.9478	33.0521	34.0545	35.6724	34.0365	39.1412	36.8468	34.6697	35.3292	849.033	3431.88	658.971	266.707	70.1532	125.852	208.646	842.848	50.4664	1467.11	13569.9	365.742	7554.52	316.797	57.852	40.0297
HIT 248	32.1527	36.8819	33.2571	33.4807	37.6587	37.1468	34.1271	33.0061	33.1277	33.1002	32.7866	33.3737	32.711	33.6474	33.3342	37.0175	42.4155	40.6658	41.1921	40.7025	38.9995	39.8443	39.9729	39.1552	37.4623	36.6776	38.8313	37.2263	62.0138	43.146	51.3106	37.7025
HIT 2480	31.9168	36.413	32.4107	32.34	53.5734	69.1137	33.8079	33.0582	32.6765	33.7125	33.0466	34.3756	126.727	32.903	33.5143	34.6496	580.124	1675.23	422.397	212.477	82.1688	95.5505	199.719	523.763	197.801	868.306	8064.09	158.139	2893.35	174.429	84.112	38.9846
HIT 2482	32.1175	38.5535	34.2508	34.495	38.3758	37.663	33.9516	33.2579	33.8493	34.4077	34.8132	34.3958	33.6029	34.0328	33.5245	37.1136	11664.3	30695.5	5562.34	3773.68	4676.55	5776.01	28054.9	3385.78	1967.52	9952	26499.9	368.416	21483.4	305.546	2130.56	1695
HIT 2483	32.3732	38.3791	33.8025	33.2868	38.5272	37.2486	33.6819	32.7404	33.8794	34.1922	34.3609	33.3864	33.6672	33.9218	33.2461	36.5645	64.6563	482.75	80.0468	63.484	66.4498	87.5885	79.5008	68.4825	43.4747	126.798	176.518	42.4508	132.82	49.2136	58.7012	70.2412
HIT 2484	33.1664	41.5152	35.9752	34.8206	40.9832	41.1742	36.869	34.941	34.7754	37.3816	37.6289	42.5073	42.3004	34.5595	35.3739	47.9352	1083.06	8990.91	1327.64	674.664	1103.99	1748.13	1912.98	687.693	280.123	2854.56	4532.08	191.044	4398.57	123.144	391.962	677.563
HIT 2488	58.2395	177.942	129.835	58.3468	91.6361	43.3306	57.0636	36.7203	187.543	46.2024	44.9754	41.4911	62.3213	35.2223	34.0199	46.363	18644.3	27868.2	82932.7	10960.4	2850.6	14292.8	35403.4	26104	7377.67	20783.5	54855.3	18073.9	21096.2	6608.32	19036.7	27881.8
HIT 2489	32.1721	36.989	33.0408	33.6416	36.3969	37.4196	33.5229	32.1611	32.8447	32.8055	33.8175	32.7723	32.5415	33.1755	32.8925	35.1005	47.2947	49.5308	1328.53	43.9436	48.6734	42.2046	45.2164	43.3348	37.8432	39.6977	97.219	36.8275	62.3306	43.319	55.9354	36.7488
HIT 249	31.6084	35.5459	32.4462	33.6374	36.2644	37.5304	39.0941	33.4992	33.0827	33.5267	33.1227	33.6156	35.7239	33.31	32.6739	34.5217	44.6651	44.2723	40.9864	39.4766	40.6179	37.8033	37.8713	38.5437	37.5458	39.2378	36.9644	34.3256	57.2487	44.0569	55.4704	36.436
HIT 2490	52.8563	70.0369	67.2997	66.8259	71.2952	67.9914	184.379	78.1066	45.7089	99.5304	59.2171	62.8665	174.165	96.8841	74.3625	44.9612	881.876	2971.45	25400.8	997.75	256.067	243.887	1856.18	3653.15	666.783	698.609	9818.12	844.046	561.553	1220.8	1633.62	2012.54
HIT 2491	33.5064	51.9247	35.0159	154.408	40.0871	38.8307	1070.32	35.8117	21239.5	111.917	66.3675	350.156	325.863	99.0757	170.352	152.222	6382.56	26723	44123.5	4456.91	1878.14	4378.53	10554.2	3821.36	4245.24	2443.19	78244.1	11466.9	1750.7	8975.34	1880.85	27066.7
HIT 2492	32.474	37.6659	33.2835	33.4919	36.4407	37.1794	34.1056	32.751	33.9694	33.5246	33.7992	33.2653	33.1773	33.7995	33.3331	35.0442	140.139	2071.03	3481.01	274.305	135.65	48.3637	451.65	111.156	268.591	244.389	6835.99	963.356	64.4319	460.035	147.42	1196.76
HIT 2493	32.034	36.9927	32.9035	33.6311	36.771	37.8045	33.3988	33.0861	36.3122	34.1863	33.9324	33.5359	33.1985	34.7123	33.6235	35.5929	1409.62	20078.5	33780	5476.94	1179.89	119.158	7890.08	4068.44	3787.29	2202.24	71324.9	4058.41	138.869	6320.89	1193.92	12730.5
HIT 2495	32.4217	37.2989	32.3812	33.6829	37.2462	35.6966	33.2375	32.9797	32.9342	34.3524	33.4932	33.4227	33.0086	34.2656	33.2903	35.7946	45.208	65.5499	95.4762	46.3404	44.6742	42.0693	51.7261	55.5857	38.6616	38.643	118.003	41.138	60.9756	48.9396	60.4446	42.0654
HIT 250	34.9213	40.6117	37.9752	42.4096	47.0705	57.2214	72.8436	43.0314	38.3368	43.2539	39.0506	38.3482	43.1444	42.0698	42.4266	37.6834	104.715	49.781	51.7124	45.7558	64.9988	49.7122	48.5172	61.42	39.7341	48.4318	42.8501	40.4397	72.6906	46.4758	266.215	257.609
HIT 2500	32.0948	36.4436	32.9295	33.4868	37.715	37.34	33.5932	32.5901	32.812	34.0556	33.67	32.9335	33.0768	33.2669	32.6104	35.7492	59.5567	42.0011	43.3928	68.2401	82.8436	41.9017	40.8066	55.5847	38.0924	57.52	292.548	37.6311	66.8176	43.4481	83.5572	55.9957
HIT 2501	32.32	38.2816	33.6681	33.3603	36.9639	37.2671	33.3824	32.9789	33.2158	34.3719	33.4873	32.9222	33.5375	33.8776	32.8203	35.1234	63.9773	39.3218	47.6106	71.5966	87.4231	43.0941	43.7877	56.5614	37.95	51.7698	298.25	37.4967	65.8567	44.9201	81.2618	49.5212
HIT 2507	33.3586	39.7424	33.662	36.8664	37.2744	38.1929	37.0407	33.3307	33.073	35.5365	33.4947	35.622	33.4403	35.4472	33.867	35.7778	50.2004	51.5471	130.387	42.6421	43.8939	45.6412	46.2257	43.5476	37.9366	36.4579	69.0752	35.6738	228.511	51.1495	51.0855	82.9688
HIT 251	31.8462	41.3077	35.82	33.3198	36.8825	35.845	33.1242	32.4475	32.5242	34.3371	33.6362	32.975	33.0083	33.4782	33.3996	35.5157	44.036	36.1159	39.1256	40.0201	42.8834	43.6758	39.9636	39.4835	36.8088	38.1268	39.7732	37.3811	59.3343	42.7636	50.0384	35.9519
HIT 2513	32.1713	36.4846	32.9204	33.192	36.7936	35.917	33.1277	33.1325	32.8675	33.6992	34.092	33.3531	33.2738	33.6738	33.0612	34.3735	43.0553	39.5642	39.3735	40.1498	41.3648	42.1412	41.263	40.0743	36.2328	37.2628	38.6721	36.1579	65.7124	42.8561	51.14	36.6348
HIT 2518	32.2014	36.9627	33.2588	35.9093	36.5397	38.1529	36.5482	33.4442	33.5163	33.9825	33.3628	33.3949	33.5577	32.9191	32.9416	35.9136	42.4647	40.4608	37.299	39.6976	38.9345	41.1011	42.006	39.7666	37.4928	37.8212	39.2909	36.8321	57.098	44.283	51.0031	36.6904
HIT 2519	31.9927	36.5396	33.4916	33.5665	36.8107	36.3206	33.3082	32.6315	33.7015	33.4498	33.8348	33.1115	32.7382	33.4888	33.0853	35.0622	41.1355	39.8381	56.5846	40.3663	39.0253	43.7741	43.1418	73.6645	36.6952	36.4776	40.6573	35.8195	55.7345	39.4285	50.08	35.4797
HIT 252	206.394	55.4241	168.54	35.191	144.059	205.018	35.003	49.3133	35.1828	47.2229	37.9807	113.705	62.8454	34.875	43.4329	147.972	59.7277	48.8212	91.3552	52.0274	69.6072	56.2783	54.4726	62.9093	47.0004	43.8937	45.8895	43.5946	77.8358	53.835	69.9942	59.4817
HIT 2520	32.0048	37.0019	32.9934	33.0484	37.0115	37.0265	33.7607	32.8781	33.371	33.9621	33.0506	33.2017	33.6218	33.6395	32.9105	34.9303	42.3349	37.6231	39.4052	40.4165	36.4671	39.0982	63.4906	47.0887	36.2725	36.4744	37.1344	35.4438	64.1241	41.8407	54.075	36.4506
HIT 253	32.9406	38.7271	33.0696	34.7044	38.3569	39.1927	34.7046	32.291	33.1011	33.0911	32.7877	33.559	32.4191	33.2648	33.8357	34.788	42.6418	42.7693	39.4666	46.0134	41.1189	40.4696	40.1992	38.1574	37.3643	37.2811	38.5949	38.2238	56.1806	40.2278	49.7598	37.3037
HIT 2537	32.0155	37.4874	32.8808	34.6127	37.4293	38.5689	34.0417	32.8538	16101.5	72.9506	34.1483	33.6933	32.8629	33.2691	32.5959	35.4055	2415.16	757.084	541.543	46.3841	166.749	984.044	76.3088	99.6016	181.008	179.138	1477.81	230.201	833.629	1510.03	64.4384	4542.17
HIT 2538	32.8751	39.6613	33.8143	33.8491	62.3528	82.9367	34.5534	33.1367	93.1525	33.5454	33.8311	34.092	38.0886	34.3278	34.026	36.2594	238.062	189.34	4825.63	104.636	84.2596	158.462	194.659	160.641	91.6371	98.8112	2946.87	177.451	161.122	83.8465	184.037	300.747
HIT 2539	40.6403	39.0966	244.06	34.9837	37.2303	38.9721	36.9451	33.6916	34.2458	35.4376	34.7669	35.1061	36.1318	34.7361	33.6341	38.0125	381.918	1111.5	3580.02	1360.97	66.0643	315.406	1252.03	1385.24	1185.09	48.3626	90.1061	497.7	431.005	209.019	370.941	209.266
HIT 254	32.3469	37.8636	33.1734	33.4187	38.5425	36.9196	32.8875	32.5894	32.6143	33.2075	32.8478	32.3896	33.8137	33.6587	33.647	35.2109	48.8139	42.5996	41.9669	45.318	46.9223	47.1407	47.7978	44.4848	41.1733	36.621	38.4614	36.2076	59.1706	43.0495	50.6371	36.9319
HIT 2540	33.9534	36.9191	41.2491	33.9773	39.256	37.6988	33.627	32.3455	33.0157	33.4305	33.5112	33.1386	33.4712	33.3014	33.007	35.6175	77.1377	102.003	149.852	70.9919	44.2933	66.8345	100.98	114.976	138.958	38.9086	41.5212	71.6778	93.0829	47.1741	80.387	53.4982
HIT 2541	38.9498	38.5334	188.186	34.7134	37.2752	37.3987	34.4791	33.0678	33.4619	33.8873	34.2404	33.269	33.6248	33.2426	33.5764	36.4734	543.063	874.155	2111.94	589.243	73.1825	389.015	842.114	1395.67	1387.32	54.339	70.6937	499.705	623.207	107.716	423.754	289.792
HIT 2543	37.5926	89.5507	57.9385	37.7905	285.803	260.644	47.4894	36.8997	32.8382	39.2169	37.3375	36.5334	133.079	33.5583	35.1642	39.0317	76.8882	167.887	244.545	132.655	49.6115	112.199	143.776	171.715	246.01	47.5209	58.7189	110.342	159.059	46.5117	91.7559	59.4149
HIT 255	32.3955	36.6328	32.7203	33.3096	37.1185	38.2065	33.9414	33.3883	33.4403	33.7974	33.2412	32.9722	34.2533	33.6478	34.1903	37.0944	38.4147	40.6225	40.058	38.5171	38.5009	40.5867	39.0123	38.7381	37.1078	36.4745	39.6651	37.1392	55.1362	42.207	46.1679	35.8891
HIT 2551	32.8731	41.0365	34.9694	35.2216	38.4674	40.4133	34.5277	33.2773	34.3198	34.5021	34.6806	36.2602	34.4842	34.6186	33.9827	37.0308	49.3788	45.4456	47.0552	43.6714	44.4816	64.1529	46.7351	45.1329	37.3695	37.8861	39.2947	39.0999	63.5197	43.0106	62.9042	38.0121
HIT 2553	32.1847	36.2004	33.1737	33.0359	37.9362	35.9435	33.548	32.8706	32.4839	33.1774	34.3253	33.9358	33.487	34.3931	32.7683	36.0331	40.846	38.4615	39.8828	41.3113	41.131	42.2578	39.4472	38.3303	37.9095	36.7151	38.315	36.415	62.07	42.5906	53.254	35.5723
HIT 256	34.506	42.0745	36.3795	294.704	42.1933	47.5425	41.9277	40.4836	134.852	13704.7	2444.89	572.866	38.8508	49.4085	94.5843	38.35	22063.6	1252.98	833.407	109.363	79996.8	3443.58	18112.1	510.299	779.615	501.63	1312.83	43.3621	29918	106.491	7718.08	137.143
HIT 2563	40.3988	43.461	94.2811	63.0909	48.1985	43.9689	34.2703	33.199	34.8831	35.9333	34.6438	33.7423	34.5371	36.1413	33.2543	37.0042	94.4048	61.047	39.5637	45.7503	116.737	43.4813	45.9292	1206.14	40.0849	54.897	208.282	39.1503	80.4595	44.8473	55.1363	67.8154
HIT 2564	32.2826	34.9878	33.4089	34.0183	38.0616	37.3614	33.4415	32.7353	33.5122	33.9438	33.258	33.5989	33.4449	33.4717	33.2873	36.1494	41.7545	38.9188	38.8834	38.3773	38.842	41.4346	40.0752	37.1768	36.7583	36.1744	39.3024	35.8629	68.3045	43.6164	54.3354	34.6909
HIT 2565	34.9213	42.433	37.2327	35.4113	41.839	39.7657	38.166	35.0096	36.2219	38.1313	36.1584	35.4194	37.0864	36.6722	39.0306	38.4368	141.669	86.6482	55.7382	59.5683	137.575	60.0572	52.52	791.816	46.852	94.9034	160.665	42.796	121.688	52.4675	76.4967	129.613
HIT 2570	32.3057	38.1893	33.0472	34.066	36.6327	36.8529	33.356	32.5536	33.1141	33.8574	33.8349	33.4073	33.2275	33.4585	34.1178	35.3483	43.7873	40.6392	41.1772	40.9024	41.7948	43.3387	41.9367	41.2032	37.3625	38.6823	40.112	36.9755	59.4669	41.6221	51.5062	35.9108
HIT 2571	34.4798	46.0396	37.702	39.0256	53.0363	41.7762	44.2451	39.0848	40.8427	42.5258	41.5613	37.5098	39.8269	41.7821	38.3807	38.3433	71.459	66.0946	59.7486	58.146	57.952	62.8153	56.3086	58.5685	43.9913	53.3517	71.6299	42.675	98.4971	53.8253	103.362	52.5449
HIT 2575	41.8662	54.9551	52.1526	43.4955	45.3194	44.8924	40.6104	42.6805	48.5047	44.7246	44.9072	45.7511	41.5404	44.6862	40.4573	46.018	401.3	244.13	4098.74	333.384	122.309	95.7102	392.897	82.902	146.091	214.483	55.9052	246.021	595.79	108.335	570.56	928.226
HIT 2576	31.7952	37.138	32.8419	33.5754	39.0484	36.8662	34.8793	35.3754	34.4491	36.0164	33.8457	33.1125	34.0069	34.6301	34.8434	34.7437	42.1606	37.0387	39.5961	41.0597	42.1585	38.6414	36.9709	39.8783	37.4186	37.5672	42.1925	39.329	73.5198	47.9039	52.8346	37.2829
HIT 2577	41.9828	67.3164	54.8226	69.5829	56.7389	58.5147	142.908	91.5216	75.5209	122.008	86.5698	79.9967	75.4939	96.0226	88.9701	69.4239	92.92	84.3807	82.3608	71.3991	67.8224	73.2754	65.4212	72.0068	59.9774	44.6428	56.6277	52.647	131.136	66.401	74.8978	72.9854
HIT 258	32.2349	51.2425	34.6317	1823.86	37.5176	37.0744	34.0311	35.7851	13170.1	6243.91	1475.08	43.5544	34.0182	35.8704	40.2547	35.6217	354.401	56.9774	176.939	41.024	491.944	70.2018	86.4474	41.1567	88.6595	40.1532	51.4731	36.3866	1682.75	43.8131	89.3431	37.6093
HIT 259	33.4789	40.5033	35.3653	36.908	38.9146	37.7297	53.839	38.4345	35.8894	43.0967	38.7493	40.4371	40.3619	41.38	38.049	40.496	65.5743	61.4002	68.3952	46.6761	71.7173	57.0656	85.7552	46.0267	51.2227	48.1053	44.5167	39.1811	127.685	44.8688	60.5297	59.6376
HIT 2591	32.607	36.3833	33.3433	37.5295	38.5898	35.8579	34.5148	32.8421	32.5694	43.5092	38.9142	34.3736	33.5656	33.362	33.2401	36.5662	98.5929	44.2867	98.7174	113.268	42.0472	47.0673	39.7957	43.675	42.7666	37.3204	40.0947	38.6134	54.6155	49.8051	47.659	74.0806
HIT 2592	32.7769	41.7561	41.7215	1936.84	43.4422	38.5976	32.738	34.6118	48.5469	2559.19	2983.18	38.8597	34.7224	736.589	37.9344	37.0089	1439.37	724.568	1915.01	1447.08	214.321	135.579	210.361	502.327	1111.71	148.263	61.2708	3547.25	130.923	1919.58	514.893	1280.91
HIT 2593	32.3762	37.8685	33.7754	34.3924	36.1677	36.4446	35.88	32.4783	58.504	34.2056	33.5271	34.3189	35.2233	33.0343	34.1812	36.0803	267.913	246.509	242.447	97.9482	699.631	142.937	1706.98	200.501	121.389	105.482	408.661	347.268	91.8293	81.8588	260.523	3196.78
HIT 2594	31.8612	37.3174	33.4959	33.9905	37.4224	36.9566	34.4319	33.153	34.1218	34.311	33.7464	33.273	33.3413	34.2091	33.9943	35.382	54.9262	39.0574	57.0344	48.3659	81.171	38.6593	113.578	43.2267	39.1092	42.95	39.7106	37.3448	69.4861	47.5852	60.9823	136.018
HIT 2595	32.1424	35.6209	32.9501	33.0682	36.3836	36.6416	33.4906	32.3986	32.3221	33.5598	33.0691	33.6551	35.9967	33.8135	31.8522	35.1054	43.8693	43.606	39.6964	41.9549	45.9731	40.5227	53.7068	37.4776	36.4223	37.2648	38.5067	35.5866	62.3042	42.2301	52.2403	36.0568
HIT 2599	31.9925	35.6733	33.0039	34.1871	35.733	38.4512	34.137	33.1776	34.167	34.7902	34.4163	33.8356	33.2026	32.825	33.2007	35.1793	47.2442	42.3914	46.5629	41.1563	39.5706	45.3187	46.5351	40.9426	36.9933	37.2583	38.7633	35.2523	60.9465	122.763	51.8758	37.3909
HIT 2600	32.2615	37.3118	33.3176	33.905	38.7295	36.5523	32.9828	32.7577	33.2363	33.7578	34.4816	36.3265	33.709	33.2917	33.4739	36.2304	44.5293	39.5387	40.4796	43.5772	47.4674	47.5429	43.3605	42.2845	36.5857	49.8648	49.2415	39.0733	162.562	107.322	58.0034	36.9127
HIT 2601	32.818	47.0972	34.9003	37.357	39.5784	40.4019	39.8483	37.6639	35.824	38.9729	40.8153	37.6113	37.335	41.9771	37.2138	39.6827	52.0547	47.1193	50.2386	50.4421	46.0336	50.0591	57.2405	56.4512	38.4862	38.9363	42.1235	35.9568	87.7826	426.483	65.8863	41.1978
HIT 2605	31.8332	35.8986	33.3638	34.1016	36.9524	37.1142	34.014	33.1453	32.3564	34.1097	34.317	34.1536	33.9	33.7799	32.7483	34.8803	45.8418	45.6304	44.6778	45.1391	42.378	43.367	49.2266	44.0204	38.1303	42.5359	40.492	36.195	63.9477	42.2387	51.4536	36.1154
HIT 2606	32.4131	38.8468	33.4022	33.4236	36.9256	37.3134	32.9022	33.6942	33.5634	33.3739	33.9132	34.2014	35.4619	33.7355	33.8386	36.6648	45.2639	41.7418	42.9794	45.2548	104.298	82.1053	50.0449	40.7361	43.7859	128.795	39.2871	35.4745	72.894	43.2054	52.5436	37.3448
HIT 2607	32.7274	40.9149	33.9145	33.8498	37.1425	38.7304	33.7253	33.1322	33.121	34.2436	34.8545	34.5545	34.3055	34.3432	33.6066	36.0196	43.096	42.4482	43.4833	41.407	43.2361	44.0385	44.6431	41.9685	40.1352	242.44	40.3618	35.4803	61.3115	46.7487	58.5484	36.5406
HIT 261	31.2899	38.6961	32.801	34.1455	37.779	37.4432	35.272	33.0367	32.3855	34.3583	34.3048	33.6312	33.5955	33.912	33.7978	36.5193	47.1804	45.0963	42.7016	42.282	45.1934	42.6565	39.7304	41.4119	38.4653	36.7319	39.7392	37.4034	69.7736	45.3813	55.6816	35.0602
HIT 2611	33.2594	39.0113	34.7081	86.4428	39.5885	38.7654	34.6787	33.5986	59.2703	145.439	138.438	39.138	34.6475	75.5097	35.9495	38.8672	280.877	278.562	263.525	215.716	111.714	86.9652	72.1197	217.053	119.567	68.2865	180.959	269.122	85.3853	137.926	170.747	148.736
HIT 2612	32.3925	36.4774	33.3419	34.5175	36.3263	36.3582	34.3765	32.7104	33.0914	34.3628	35.1924	33.5752	33.6027	35.0096	33.0804	36.4916	43.4118	52.8782	44.7097	44.1317	43.2888	43.171	40.9582	41.4309	37.8493	36.0154	39.5658	39.605	59.6936	42.1286	67.4652	37.1546
HIT 2613	34.197	46.8142	36.3261	38.0409	42.6682	42.6558	39.2739	36.0111	36.5391	40.2482	38.3595	37.8483	37.5552	38.1613	35.8341	40.747	81.7477	62.6273	66.8465	51.5852	79.6325	52.3326	51.1098	70.8202	44.7576	53.9363	133.596	40.0462	156.203	54.9485	250.715	67.4334
HIT 2618	33.0357	39.4918	35.2831	369.432	39.9215	37.0782	34.1035	33.4209	34.7087	67.5047	148.184	33.3638	43.1346	15045.4	33.8158	36.3926	2709.55	8286.24	8166.93	16959.3	1884.73	273.537	1381.48	10103	5797.25	529.296	346.688	43917.6	168.58	29473	6264.16	18851.3
HIT 262	45.7354	59.7408	61.0612	41.1844	48.4559	57.7368	39.6646	39.5895	45.0925	57.6207	40.1406	42.5135	42.4039	39.1952	36.4684	43.268	153.076	122.24	174.862	90.9639	205.871	96.1847	119.787	111.832	62.7367	338.201	170.514	118.202	1390.34	79.4128	140.936	137.417
HIT 2623	32.4882	37.7376	33.024	33.4014	37.6996	38.6794	34.8201	33.5228	33.4633	35.6155	34.5148	34.6317	34.4036	34.442	33.9265	36.3664	48.9945	41.5782	42.7128	42.4156	42.2157	56.8687	49.8116	42.4269	38.4571	37.431	38.6324	36.1222	64.2649	43.9078	58.457	37.6078
HIT 2624	32.0745	38.2148	32.86	33.5918	36.7131	36.1367	33.359	33.1556	33.1044	33.743	33.8637	33.1662	33.9824	33.461	32.7309	35.3834	84.3554	41.9903	76.4721	43.3201	105.864	117.269	88.2756	54.539	46.9892	67.0169	38.5229	36.2376	203.587	43.6538	90.9372	112.198
HIT 2625	32.7097	40.11	34.0026	35.5659	40.0888	39.7196	37.1133	34.8076	36.599	37.1095	35.448	35.1965	34.7179	35.9089	34.6845	37.7399	109.805	46.7934	93.1631	51.1154	87.9306	121.211	199.637	54.8294	72.8992	73.7007	40.655	38.8178	67.7295	44.4075	92.8076	88.21
HIT 2629	32.2208	36.6053	33.9373	34.0947	38.2309	37.8416	33.4691	33.2993	33.3888	34.5752	34.0435	34.5873	34.5509	33.9741	34.0045	37.9178	185.321	65.0666	236.548	52.3661	166.278	43.3322	55.6643	185.662	61.2833	40.5346	63.8854	39.629	282.036	390.424	125.772	92.8882
HIT 263	32.1649	35.314	32.9799	33.0668	37.7258	36.1981	33.2165	32.4546	33.1305	33.0168	33.8378	33.154	32.587	33.5061	32.8695	35.0786	42.561	39.2471	39.5428	40.1135	46.6503	41.8634	43.5568	35.3664	40.0908	37.5538	40.2684	35.9172	157.988	41.2931	61.6887	40.3035
HIT 2630	32.3819	37.0085	32.5737	33.226	35.8475	36.4395	33.1197	32.8972	33.5455	34.3035	33.9119	33.6378	34.8469	33.4283	33.55	34.5144	69.3991	49.7346	97.958	47.2478	80.2892	43.7298	58.5788	57.1736	43.0849	37.1431	43.2943	35.7764	87.263	92.1214	71.9959	45.8738
HIT 2631	32.7451	36.7844	33.0907	34.2224	38.0747	37.6494	33.5408	33.1827	32.198	33.4228	32.8215	33.5367	33.2645	33.857	32.8543	35.722	50.0846	40.9751	83.717	40.4383	39.4214	40.0408	42.6546	47.0614	39.9648	36.3026	44.3255	36.3784	55.884	65.7371	70.2389	42.1219
HIT 2635	33.2771	40.0471	35.0984	34.9293	39.7562	37.8853	33.2758	33.0875	33.5162	34.9648	34.4504	34.5722	33.2965	34.8234	33.2925	37.0611	1479.73	85.8765	1348.73	1485.45	7828.37	2097.73	8028.75	2645.15	301.353	6536.51	17924.6	61.9885	96.7926	6134.63	549.925	2197.19
HIT 2636	32.7562	40.4727	34.7922	35.0893	36.334	38.6366	35.1763	36.3213	34.3269	35.1144	34.084	35.5427	34.9825	36.9022	33.1503	37.9577	375.585	53.5835	344.273	446.881	2041.4	587.716	1987.12	673.216	138.243	1875.82	5039.89	46.9918	68.5584	2068.67	205.018	655.796
HIT 2637	31.7641	37.0111	32.6845	33.241	38.0051	36.0663	33.2844	33.075	33.0945	33.8912	33.317	33.5971	32.9733	32.9767	32.1471	35.0039	122.606	39.4122	107.723	131.608	515.569	154.911	442.586	185.832	50.7237	626.501	1297.95	37.8527	59.6199	470.897	86.3254	229.615
HIT 264	32.8473	39.7469	34.0408	33.6189	42.0085	42.3556	33.9715	33.788	33.4551	63.9638	35.5451	34.0941	34.952	34.232	33.4602	37.598	93.2328	90.9041	104.371	49.8743	135.578	70.6604	126.011	49.9609	59.5384	78.3753	68.3146	37.1985	2440.94	45.2707	67.0508	86.0238
HIT 2642	32.1847	36.0312	33.332	33.5126	36.7449	36.0756	33.7496	32.4468	33.1929	34.7162	34.622	34.0284	34.3716	33.8085	33.593	34.8036	62.2092	44.7028	63.0418	45.8454	69.5281	41.8831	46.9947	55.3134	41.4863	37.1129	41.4535	35.922	93.1814	92.0662	61.7616	43.7754
HIT 2643	32.312	36.0216	33.0646	33.8843	38.3819	41.7581	34.0364	32.7406	32.9405	34.0517	33.5426	33.5845	33.8202	33.9751	33.3249	35.6333	63.5491	39.6756	41.9118	41.0046	59.3919	43.228	40.6231	41.2612	39.3779	37.2593	38.1986	36.935	99.2515	92.651	50.0323	41.2245
HIT 265	32.5548	37.963	34.3742	37.6809	36.8852	36.8858	52.9719	33.6237	36.0687	84.1575	39.2702	42.4237	40.8525	37.3386	37.5344	38.8346	242.382	156.05	168.988	54.4724	300.186	87.3847	232.552	234.33	194.411	143.243	72.1836	45.6932	418.059	48.9782	285.447	178.873
HIT 2653	32.437	37.4361	33.8752	33.9123	38.932	37.6051	33.7619	33.7566	34.1445	34.776	34.5417	33.6557	34.6447	34.7863	33.4624	36.8406	46.6285	45.1736	80.429	51.2402	45.1854	43.9526	43.2337	51.2261	39.7651	49.4385	40.8625	78.1476	61.6001	49.7319	54.3141	159.164
HIT 2654	31.9824	39.4363	33.6182	32.5356	34.5345	36.7184	33.3965	32.1521	33.1802	32.8417	33.5888	33.3111	33.3271	33.4137	32.4768	36.3748	404.112	295.822	299.754	68.8908	184.657	115.898	117.164	119.368	47.2668	147.737	102.596	161.703	61.042	184.214	292.438	428.995
HIT 2655	32.4299	37.7587	33.4741	33.8178	35.6464	38.7038	33.9136	32.3502	33.4364	33.7716	33.1314	33.6246	33.1942	33.4319	32.9808	34.7426	41.6535	37.9629	42.125	40.8008	39.5088	41.8934	36.9235	89.3076	37.6833	116.968	38.1735	154.605	59.2223	41.6343	49.8974	255.615
HIT 2659	32.6311	40.1896	33.3033	33.2513	37.863	36.0647	33.6323	31.8309	32.7062	34.6377	34.3601	32.9646	33.0364	34.4191	33.0709	36.2141	95.3133	94.1052	54.8622	42.8882	41.4007	55.8347	99.2547	91.7953	54.2616	63.9236	58.8795	91.9613	64.4946	53.0557	222.212	150.706
HIT 266	32.084	38.3565	33.728	33.8681	38.2786	36.9428	34.4999	32.5426	32.0838	36.2468	34.1065	33.3285	34.4116	34.0449	33.7482	34.7259	50.2974	44.387	46.4489	41.8989	60.1838	43.2093	50.9445	47.8776	47.4532	46.3029	41.0129	37.2798	73.0933	41.8116	71.0233	44.6739
HIT 2660	32.1151	39.4722	32.9485	34.1776	37.9498	38.6055	34.1306	38.7548	33.4215	35.5426	33.3629	34.1239	33.8797	32.9562	33.1048	36.8118	1369.03	1108.88	230.239	224.216	76.9534	755.316	2198.39	791.935	443.984	746.645	214.24	2392.14	862.824	51.6947	263.319	1423.96
HIT 2661	32.0412	37.3404	33.0185	33.7669	37.8838	38.7244	33.6857	32.5582	33.0437	33.592	33.5231	32.8298	32.9495	33.275	33.1658	36.0373	585.448	488.445	133.457	129.768	55.0524	259.31	326.069	335.872	170.764	328.597	98.2528	966.475	169.925	44.9622	105.959	540.542
HIT 2665	32.1562	36.2806	33.0783	34.0632	41.9546	39.4683	33.202	33.5888	34.0205	35.3202	33.9417	35.7479	35.7873	34.0014	33.8603	40.7906	2568.85	6104.6	3119.82	89791.4	4724.51	51.8315	55.3368	3462.47	21688.4	41.2347	50.8253	4533.98	109917	378.879	36022.1	97.1953
HIT 2666	31.8772	36.7525	33.1337	33.8154	36.8718	37.0467	33.6493	33.5183	32.6716	35.1775	33.3368	34.5258	34.9525	33.1385	33.5563	36.6006	191.085	388.845	384.2	10244.9	336.829	41.3899	40.6565	216.026	1299.97	36.6434	41.7232	416.963	9555.02	78.721	2378.62	49.2547
HIT 2667	31.9848	37.7839	32.522	33.9743	36.9384	37.5689	33.7112	32.7148	32.8834	33.4659	33.8643	33.2583	33.4876	33.8123	33.287	36.2701	514.809	1226.67	1041.69	27228.3	715.959	46.5205	45.654	661.366	5506.22	37.2443	40.4255	974.664	26253.9	91.2331	7485.6	59.2991
HIT 267	31.8778	36.0695	32.8054	32.3987	37.2287	34.9412	33.0433	32.6031	32.8707	33.9916	33.4153	33.2172	32.8394	33.3249	32.7166	35.0099	44.0038	42.9977	43.3081	39.2843	47.3248	40.7509	37.9699	37.6462	39.9162	41.8419	38.996	36.579	66.1351	41.5089	57.795	38.7118
HIT 2671	32.6812	35.993	34.1295	34.1467	38.5919	37.0142	33.838	33.0583	33.7169	34.8489	34.3844	33.3368	33.3275	33.8901	33.2055	35.8721	602.957	5435.29	134.979	88.1485	194.955	353.696	774.013	105.999	170.76	39.3266	468.463	55.8868	524.003	45.7613	84.7068	79.1595
HIT 2672	32.1156	36.3294	32.7596	34.0326	37.0514	36.48	33.616	32.4539	33.1065	32.2335	33.6297	33.4354	33.6018	32.7715	32.8845	35.5202	39.9125	41.5852	39.6969	39.8048	38.5519	41.7474	40.8457	35.6373	37.3032	36.483	39.5881	37.4645	54.8255	42.2322	46.109	36.2948
HIT 2673	34.879	37.7441	53.7344	32.9916	36.5475	37.1633	33.263	33.4508	33.4271	40.3874	33.1308	38.138	35.7875	33.7267	32.7873	36.4795	221.16	968.378	64.2051	50.5675	113.438	130.553	308.099	55.0366	93.1962	38.8981	159.387	38.4411	114.29	41.219	58.7721	47.2836
HIT 2677	33.2576	37.3642	35.0399	35.3267	37.7324	38.4655	35.0507	33.7146	33.9049	35.9416	35.4613	35.2604	34.7037	35.2329	34.1515	36.7663	156.813	1150.68	68.1746	58.2536	80.0192	125.089	197.466	59.1304	92.9133	38.0924	131.526	45.954	145.116	44.1975	57.1813	59.825
HIT 2678	32.2453	39.6868	33.2463	33.1999	36.3159	37.1481	34.1505	32.9073	34.0737	33.4327	33.9044	34.5271	33.0088	34.2532	33.2969	35.6166	47.7983	41.8154	40.6329	37.5319	43.9268	44.7485	41.7138	38.8921	40.4378	38.1225	39.6253	36.2299	68.3113	43.0585	55.1989	37.6839
HIT 2679	33.5525	42.7944	34.2898	35.8594	39.356	40.2282	37.657	35.5103	35.9273	38.1886	35.8555	41.3313	37.2006	37.0482	35.8614	42.4965	51.4597	57.9325	43.5492	46.6726	45.4844	48.8928	54.1705	46.1602	71.3689	37.1389	40.2699	37.698	64.578	44.2676	52.3852	54.5927
HIT 2683	32.0481	38.0696	33.1919	33.9308	37.9265	36.98	33.6859	32.8421	33.2275	33.6929	33.6823	33.7109	34.5631	33.6147	33.3338	36.4493	24223.9	2819.57	3065.97	1472.02	914.15	11508.7	5415.93	74.2661	4783.91	440.303	2319.69	25068	5372.69	69.4872	1667.58	9430.16
HIT 2684	32.5378	37.1232	33.0849	33.3793	38.4662	38.3522	33.2215	32.7283	32.3461	33.5544	33.5385	32.8103	34.0537	32.981	33.367	36.0535	14078.4	5050.53	2283.16	939.157	488.989	5572.79	7055.22	1796.28	3678.55	1494.35	1979.7	13146.8	14510.6	80.4362	1628.26	7157.8
HIT 2685	31.7813	36.1856	32.8837	33.7814	36.8904	37.0226	33.4648	33.055	33.0204	34.3224	33.7971	33.3907	33.549	33.5415	32.7729	37.5644	13579.9	12353.3	2483.08	2662.44	347.568	6786.74	9144.92	8906.47	3172.39	8180.62	1647.86	18497.7	3619.48	135.259	1828.77	8761.52
HIT 269	31.6506	35.5479	32.7784	33.3578	37.226	38.1893	34.1439	32.628	32.1273	32.9424	33.7152	33.0672	32.673	34.1892	32.2827	34.2621	1067.56	1001.94	712.426	47.9788	3924.9	377.801	1002.39	42.4012	1146.22	1784.99	200.777	36.1377	3787.05	72.6796	315.299	918.357
HIT 27	33.2603	43.7218	33.3587	33.6353	41.3889	35.5517	33.3432	33.544	32.9912	34.5422	34.9879	33.1436	34.5983	33.6099	33.4146	35.1883	11423.8	8641.58	94.0368	277.398	14907.2	335.473	195.671	22878.5	359.103	1069.23	24726	157.378	439.887	43.9291	523.028	5348.56
HIT 2701	31.7376	36.3137	33.2877	33.9254	37.6439	36.4524	33.2316	32.7464	32.757	32.6193	34.58	33.0818	33.1453	33.7568	33.4703	35.508	43.2663	43.554	39.6562	39.4658	41.0332	39.569	39.3403	41.0416	45.0489	36.9802	39.1639	35.4651	57.8854	42.8854	51.7839	36.229
HIT 2702	31.751	36.1086	33.0041	33.0386	37.4614	35.9457	33.3074	33.2268	32.9601	33.3654	33.3287	33.2991	34.3325	32.7333	33.2253	33.3143	39.799	40.4185	40.0343	39.5233	37.3218	40.8797	37.8433	39.9581	37.9257	35.6279	39.404	35.3388	65.1353	46.8003	55.4848	36.3828
HIT 2703	32.2647	37.882	34.0856	33.8488	35.8951	38.6229	34.1567	33.1951	34.9015	34.8056	34.2186	33.4215	33.4977	34.8079	33.3134	35.5083	48.3124	261.451	125.69	41.6354	42.4814	49.3105	39.9747	189.116	330.358	36.2877	39.8486	36.3657	62.9811	43.1943	55.2961	38.4314
HIT 2708	32.2604	36.3862	32.656	33.3431	34.9872	37.1004	33.6348	33.0977	32.3688	33.2017	34.63	33.3481	33.2375	32.7389	31.9739	34.8734	42.28	37.6122	39.1514	39.5267	40.7658	41.0701	43.6152	36.3892	39.1929	39.092	410.422	37.5741	99.8051	41.0414	101.096	116.414
HIT 2709	32.1016	37.0488	33.0919	33.5714	37.3991	36.3912	33.44	32.3696	32.9115	33.8844	33.3108	33.228	34.6272	33.2661	32.5925	35.6368	43.7444	37.7385	39.999	41.4265	41.3555	40.1232	39.5624	38.66	38.1245	37.4665	226.024	35.9388	76.5172	41.4403	73.7888	59.8744
HIT 271	31.9357	36.3976	33.7745	33.6225	35.8031	37.5975	31.817	32.7681	33.022	33.9502	34.2313	33.4643	34.4551	33.0741	32.5439	34.6992	52.4103	45.0542	50.7741	47.7646	52.2191	39.7289	43.6218	82.0834	39.8973	37.1427	41.9257	39.1401	70.0394	88.5053	59.1194	41.6227
HIT 2710	31.9961	37.6785	33.4531	33.4681	36.7994	36.602	33.3471	32.557	32.3835	34.046	33.297	33.1013	33.2133	33.4853	32.6701	34.9453	46.1123	44.5333	41.4505	41.8682	44.115	46.5779	66.4508	38.6564	39.4768	57.256	518.333	38.5649	2010.23	43.2716	83.0791	92.1316
HIT 2711	32.0875	38.4387	32.9073	33.4322	35.2589	36.3696	34.112	33.1932	34.16	33.1654	33.4302	34.1006	33.2116	33.2383	32.305	34.8347	39.5234	38.4222	40.0693	39.0795	38.4695	36.8623	41.2834	38.8002	37.6593	37.7701	40.0631	36.2059	57.0608	41.1197	49.0388	35.6275
HIT 2712	50.1883	39.0313	41.8547	35.2402	40.4563	36.9139	35.1136	35.5283	34.0961	41.8623	34.4643	48.13	40.2101	34.9265	34.7098	46.0709	2657.44	49.8774	53.3474	58.9948	469.178	267.326	75.4335	53.3515	262.11	48.4294	4827.65	48.3326	43439.3	98.2616	178.63	191.288
HIT 2714	31.7136	37.2241	33.3127	33.3965	36.5432	37.1856	33.3907	32.82	32.9711	33.5632	34.3241	33.1357	32.9773	33.9558	33.009	35.555	95.9825	628.637	46.2013	46.9638	53.7351	73.9212	108.837	43.61	50.0152	35.7581	111.278	38.4425	100.162	42.3507	52.1325	39.6375
HIT 2716	36.0296	40.6944	33.6592	36.8196	47.7595	37.5111	34.2972	33.242	32.688	33.7021	34.2655	33.8834	34.3776	34.7972	34.1585	35.7562	8145.51	56403.2	1269.63	87.2178	2048.16	2235.68	54.0265	250.84	1837.45	4002.91	24407.9	257.979	994.222	117.317	312.75	271.342
HIT 2717	31.8936	37.8864	33.3678	34.8779	38.5913	37.9029	32.8857	32.9423	36.4495	35.8244	35.6217	32.3956	33.0088	34.1726	34.5705	34.5914	43.4191	43.7141	44.1547	43.6288	41.7604	46.5563	43.4643	41.5635	42.5058	37.4049	39.9071	36.2731	66.4289	39.7062	53.7827	37.9216
HIT 2718	37.172	37.4204	34.404	34.155	44.058	37.2642	34.3889	34.1746	33.2427	35.5373	34.1494	35.0704	35.5628	34.9269	32.7837	35.9973	3576.92	23572.4	629.031	63.5024	1541.89	1030.82	47.3944	116.884	1084.04	1540.98	12814.6	196.938	363.861	63.8123	123.602	207.771
HIT 272	32.1926	37.3163	32.5449	33.2041	36.0435	37.1721	33.0771	33.0883	32.7215	33.8024	33.6325	33.7554	32.4622	33.7988	32.6898	33.7849	42.3459	40.4786	39.749	41.9927	41.3161	46.7316	42.7858	45.9699	37.5282	37.581	39.0236	35.9313	57.1739	44.1864	50.2672	36.5449
HIT 2723	31.9677	36.2664	32.94	32.8353	36.2741	36.5961	33.6462	33.1776	32.6706	33.3792	33.5528	33.329	32.9805	33.3301	32.8654	34.6617	59.1147	42.2244	43.0754	40.2197	43.4437	45.5909	39.4192	39.5134	37.3013	55.2723	148.329	36.8596	64.0598	43.642	54.5576	36.0217
HIT 273	32.1392	37.5154	32.6867	33.5118	39.8279	37.0284	33.0297	31.9241	32.5608	33.4275	34.0057	33.0321	33.0607	33.2204	32.7372	35.2427	42.7835	41.7252	41.0736	44.8882	41.6851	37.734	38.3973	114.148	39.2314	35.559	37.6124	36.5142	62.569	102.77	50.8149	43.7551
HIT 2731	33.4056	41.0717	35.2807	40.4599	38.5444	36.7553	74.3441	33.8066	235.579	47.4483	36.209	50.4476	48.2442	37.2954	41.5968	43.1748	6385.57	6364.69	1691.54	2222.55	536.15	6838.59	3374.36	9429.42	2441.56	725.231	2527.44	4710.77	1050.89	1108.81	1214.96	35771
HIT 2732	32.9349	38.068	33.4903	33.6259	36.47	38.774	34.0006	33.1213	33.2849	33.0854	34.3664	33.4735	32.7489	32.9848	32.7978	35.7182	57.9681	48.928	52.9102	59.3765	48.0921	94.8001	59.7758	102.985	42.7644	39.6393	39.7029	69.1338	58.5956	48.5607	52.8758	292.017
HIT 2733	31.8539	35.9546	33.7164	34.1793	36.103	37.6336	33.7611	32.651	33.4302	33.2255	34.0895	33.7345	32.6331	32.8045	32.1748	35.7141	67.6866	49.7237	41.2667	46.2553	39.6033	65.9901	41.695	57.8566	38.4342	36.2075	39.5951	37.6819	57.5412	39.5604	45.2503	72.8024
HIT 2734	33.7202	36.7753	33.958	33.247	38.352	39.2392	33.9668	32.4704	35.1945	33.8185	33.6948	34.2413	34.2173	33.3719	33.5032	36.3973	1483.65	231.691	646.229	94.1044	45.0222	190.258	182.524	244.546	183.609	186.185	131.295	195.093	56.9903	314.077	2580.53	969.674
HIT 2735	31.9507	35.9195	33.0644	33.5791	35.5773	36.2321	33.4255	32.3456	32.9379	34.9981	33.9246	33.4863	33.0783	32.9215	32.9347	35.6546	43.1577	39.7521	39.4025	38.601	42.7661	39.006	37.866	39.4137	36.327	36.2193	40.1896	36.2448	54.1492	41.7779	47.529	37.332
HIT 2736	32.622	35.261	33.5692	33.8436	37.0642	38.5667	34.552	35.5383	33.7353	35.9941	34.4046	35.5458	44.9535	33.7905	33.3714	36.9177	66.4083	88.2751	59.6125	51.3885	48.276	58.6333	78.1481	49.5419	53.2141	61.7013	71.6006	55.204	97.8539	50.5006	65.4256	60.8468
HIT 274	32.1217	38.1413	33.8433	35.1158	38.9743	37.5305	41.5273	36.8597	36.2411	38.8376	35.6666	36.7687	36.8978	37.0544	35.4309	36.4763	63.6512	46.5455	161.602	53.3191	71.3895	44.6808	56.1294	164.866	49.8429	41.8474	46.9912	38.0346	62.1214	169.47	104.282	59.9762
HIT 2740	34.2824	43.3727	35.6156	36.8277	39.8393	40.6472	40.2064	35.5472	84.0287	40.241	38.2203	38.1617	36.7517	37.7316	36.306	40.6018	38455.6	37488.3	30385.9	5488.39	404.219	10473.3	29842.7	13551.1	6116.2	26614.3	20601.4	4253.94	12620.9	21306.6	47753.4	60006.7
HIT 2741	32.6357	35.5313	33.1325	33.9272	38.5202	36.6226	33.2931	32.6514	33.1034	33.5547	33.4954	33.5857	33.3345	33.3248	33.5562	36.2494	71.8246	74.1846	52.0995	45.8027	39.9282	50.5252	57.9555	48.6766	44.2952	51.7039	55.3107	40.0132	67.5862	51.2803	72.9877	92.5969
HIT 2742	32.9532	36.9543	33.3963	34.1016	40.3973	40.4484	34.6295	33.593	33.0661	34.4555	34.9687	33.9567	35.0574	34.59	34.0099	36.2755	18664.6	20891.7	13015.6	2355.3	140.455	3549.29	11433.9	5782.52	4027.98	11678.4	10097.2	2685.56	5271.97	8227.05	17987.6	38590
HIT 2744	32.4516	36.8025	33.0793	33.7116	38.3528	37.4631	33.6594	33.6733	33.1382	33.7683	34.2448	33.599	34.6747	33.5375	33.0201	37.1514	7509.27	4231.42	769.91	121.233	56.9424	84.1636	1174.8	10554	375.826	1248.92	575.942	2445.06	357.175	1082.56	1081.75	4597.01
HIT 2748	39.1574	47.5218	44.7817	67.9132	59.8311	86.1455	273.172	88.2002	51.2106	122.572	78.0966	94.8027	96.1846	152.129	115.295	87.3309	1226.33	521.299	430.276	113.41	92.256	150.155	363.556	2067.69	216.15	667.056	230.557	319.639	202.184	488.73	322.641	1076.22
HIT 2749	51.7466	38.0346	41.0464	45.241	235.642	38.7617	35.7889	102.898	34.5532	44.5013	51.6567	35.0532	34.5205	39.7817	32.8691	36.8292	4290.3	1611.51	95.3365	272.044	4659.2	577.891	165.801	38408.4	271.426	1316.43	8188.84	147.073	995.495	77.2623	473.771	4206.93
HIT 275	32.7354	38.7357	36.4005	35.5663	40.5279	41.141	40.0875	37.2288	36.096	37.7864	35.8294	38.2262	35.8914	36.5936	36.9065	37.4951	56.8337	46.4095	135.704	49.1249	60.2967	40.4989	48.2151	138.191	46.2304	38.8167	44.242	38.3354	67.8148	115.192	83.6788	49.2217
HIT 2750	32.1919	37.3913	33.4602	34.1544	37.8939	36.6125	33.6272	32.5426	32.6012	33.5851	33.3365	33.5713	33.2365	32.6366	32.7843	36.2662	42.3904	35.5453	37.543	40.2028	39.3322	85.6526	42.7404	1120.04	45.7578	37.9183	39.8581	38.4788	61.5716	41.2842	51.4779	500.618
HIT 2751	39.1462	38.8755	34.8388	35.832	42.4899	39.182	34.5224	32.9272	33.2221	34.3271	34.1839	34.3642	34.1621	33.3034	34.0245	36.3819	373.804	115.736	43.5542	57.3334	333.789	348.574	92.95	13412	121.69	112.09	348.689	45.6779	85.5465	43.3267	100.341	2086.1
HIT 2752	31.7026	37.7995	32.7363	33.1505	36.5582	35.1986	33.4138	32.462	33.5126	34.8013	34.0792	34.0421	32.8153	34.1877	33.5608	36.0421	46.4325	41.7961	42.2622	43.6528	42.7347	106.031	39.6859	49.4434	41.4502	36.5632	42.3785	36.6994	58.3605	40.9529	51.1596	53.7369
HIT 2753	33.0325	37.139	32.8304	33.4689	36.0366	36.5704	32.4402	32.9077	32.677	33.1471	33.2772	32.8774	33.0435	33.34	32.4827	34.4604	38.1499	41.2164	42.0376	41.3339	41.4659	45.614	36.3302	36.847	36.3515	35.7381	36.5277	36.3593	55.5416	39.6856	48.3343	39.0765
HIT 2754	32.6428	37.9914	32.9011	33.3395	48.7778	38.0651	33.6714	54.564	33.5246	33.9691	35.0903	33.8139	33.1369	32.9823	32.9254	35.6184	77.2843	68.6688	52.2213	51.484	71.6404	59.556	48.7406	62.725	40.9268	49.9638	77.8241	37.2378	77.034	54.288	61.3728	56.969
HIT 2755	32.6067	36.759	32.7288	33.9428	37.1882	35.9731	34.1171	35.7292	33.2734	34.0509	34.3078	35.9268	33.0911	33.5291	32.4181	37.2628	43.7478	42.2329	39.0955	43.8859	40.178	37.8209	39.4002	40.1018	37.3655	37.4115	40.6435	38.0597	72.8057	43.2266	49.6113	36.8718
HIT 2756	33.0727	37.3771	33.3698	33.7545	36.7395	37.7297	33.0348	32.4101	33.0293	34.5708	33.7671	33.5785	33.0992	33.8475	33.3983	36.1074	42.1629	41.0695	39.6833	40.6034	39.7231	40.7687	39.2165	39.5896	39.2478	35.6847	38.3444	35.4368	55.9738	42.3019	51.2242	37.2203
HIT 2757	31.7536	38.5133	33.124	33.0679	36.6545	38.4565	34.2907	32.6737	33.2482	34.4987	33.3326	33.0914	33.6622	33.3294	33.0349	34.8663	96.6099	59.6663	44.8715	41.5848	37.1535	55.0603	43.8338	42.8727	40.0686	49.1345	39.4245	39.9531	62.2742	43.1317	49.8354	43.5328
HIT 2759	32.0616	36.1935	33.2916	33.3436	37.0887	36.4376	33.4092	33.071	32.8042	33.7498	33.4435	33.583	33.1423	33.4531	32.7605	35.3592	47.3394	45.631	40.6345	40.6771	41.0085	44.6552	46.2765	37.5124	37.5328	36.7427	41.7531	36.862	63.3908	42.6583	50.3393	36.5353
HIT 276	32.9431	39.0014	33.71	33.0448	36.2821	36.502	33.3334	33.2916	32.8196	33.6455	33.6233	34.0004	33.7721	33.1353	34.1705	36.2191	58.045	45.1428	162.884	52.1749	54.1414	39.7132	48.9934	165.828	47.6821	37.555	45.2561	38.0237	69.2044	129.629	100.335	56.972
HIT 2765	32.0814	37.1947	33.3942	33.0815	37.4704	37.1982	33.7477	32.7412	32.6729	33.5787	33.9717	33.3612	33.2342	33.5411	32.5568	35.5102	1026.32	2605.09	161.605	97.1373	98.9434	49.2081	43.5745	55.3015	590.005	52.0622	462.852	45.185	56.5007	84.9717	777.637	150.745
HIT 2767	32.0401	38.3764	33.1057	33.192	36.2609	35.8116	34.4237	32.8236	33.0471	34.7516	33.3342	33.8149	33.7134	34.3591	33.047	36.4259	57.2793	44.8781	39.4095	42.4817	84.1465	65.4487	39.2867	40.6865	38.3452	37.9813	39.2989	37.0192	109.783	41.8654	49.1436	49.8801
HIT 2768	32.3126	36.9084	33.3198	33.4176	42.9803	46.1434	33.9881	32.7331	33.8504	34.9295	33.603	33.2726	36.636	34.8555	33.1885	42.3426	48.1392	46.0853	42.5536	42.9052	46.5406	50.1977	47.7868	40.4789	42.2482	39.0228	42.42	38.4567	219.685	41.5797	50.6896	37.8146
HIT 2769	31.8394	37.5586	33.6174	33.2615	46.2009	50.727	33.5518	33.5059	32.874	34.5185	34.3498	34.0285	40.151	32.9184	33.597	35.5002	52.6474	55.7737	48.9463	41.9808	59.056	65.9524	46.5631	42.4792	63.9835	38.0662	42.7692	37.5346	4022.02	46.0717	75.354	35.9123
HIT 277	43.968	70.3768	44.29	79.6592	48.1763	51.5196	378.701	79.0465	51.4425	80.3031	59.3905	128.485	136.672	73.2719	83.4988	64.4132	174.735	282.51	100.723	96.7636	80.663	134.373	82.4979	75.1708	545.991	58.5564	102.02	67.2873	137.337	107.076	151.593	202.585
HIT 2770	40.5088	656.456	78.3796	87.0446	48.6424	35.705	2120	333.07	2266.39	736.413	123.851	10738	519.713	527.334	357.383	10827.2	47.515	56.2084	41.1081	40.8645	43.1293	41.595	39.8329	44.6673	43.882	37.6693	39.4773	39.6557	3003.12	59.9369	88.4409	36.2874
HIT 2771	32.3046	41.0412	32.9188	34.556	36.3466	38.6385	33.3398	33.3002	33.6711	34.0202	33.8361	34.1284	33.7049	33.2062	32.4637	35.6688	42.6917	45.2364	43.7515	41.7012	44.8879	41.0911	43.5739	40.6055	37.866	37.4485	38.5595	37.1053	77.2656	41.8667	50.1307	36.8273
HIT 2772	68.5624	66.0689	102.528	42.966	43.8954	37.087	58.809	67.9399	40.992	79.6755	45.4661	240.567	107.163	42.9737	61.141	291.145	80.206	65.813	80.751	115.091	94.5695	83.0808	87.1265	51.2164	81.9774	52.175	44.0251	47.9777	4646.06	84.619	91.2747	55.2042
HIT 2783	32.0576	36.1653	33.0061	33.6642	36.4378	37.3936	36.8705	33.749	33.3248	35.7679	34.254	33.9358	34.4965	35.2199	34.5833	34.7934	40.7077	35.4761	36.3524	39.7707	39.512	39.7821	39.6907	36.6812	35.6751	36.2155	37.4553	36.1448	55.2142	42.2861	50.0157	35.1589
HIT 2789	33.0107	35.5673	32.3419	44.31	36.8371	37.8962	33.7453	32.3361	32.8823	34.3533	33.3173	33.4958	32.7784	33.9619	33.6806	36.2054	95.2586	38.6475	39.4903	38.9007	40.1146	98.9605	36.3573	38.5416	41.7344	36.1652	39.0386	47.2078	55.7078	41.9287	51.3133	47.2125
HIT 279	34.3176	49.3724	37.5238	46.3544	45.4104	46.3926	74.6836	38.074	42.715	45.9056	45.4312	48.4535	51.1651	47.4466	43.469	47.5864	74.6075	69.0679	65.673	70.5266	53.5014	63.0204	54.9056	52.3591	234.091	41.8405	43.7516	56.3969	83.9667	52.4072	56.9202	55.4534
HIT 2790	32.4268	38.4001	36.5094	34.4539	39.8336	37.1367	41.1346	33.9744	32.8707	34.2726	34.6005	34.3398	3161.19	33.5773	33.5004	37.8271	7001.38	11312.2	1383.2	1598.12	750.287	3030.21	1472.07	742.224	5595.8	852.412	1827.91	686.8	2509.11	306.908	3657.3	1571.61
HIT 2791	32.2558	37.4604	32.6544	32.9801	35.8891	38.0277	33.5218	32.5666	32.3656	35.6302	33.8241	34.1347	33.9928	34.0134	32.7288	35.5926	246.11	47.3298	44.4562	44.0595	47.6753	43.4697	40.1679	40.8361	62.5929	37.2486	40.7042	37.3564	874.448	44.2719	55.1005	37.6351
HIT 2792	32.0391	37.2201	33.2776	36.2128	39.173	36.0474	34.5963	33.0142	33.7557	33.7199	34.388	33.0862	33.6097	33.9271	33.0147	38.242	428.792	42.8733	41.211	42.0005	51.4316	46.3714	38.6435	41.1997	95.6571	36.5925	40.0079	37.3962	1160.78	45.3439	65.5685	36.8885
HIT 2793	33.5187	39.0809	33.7	35.1465	37.8801	37.8499	36.4145	34.0372	35.6411	36.0131	36.1611	37.8178	35.9697	35.0901	34.0223	41.0469	17870.5	78.2222	44.3865	48.0484	700.105	667.623	49.8816	63.5911	2602.23	37.4439	39.7748	36.6491	3615.96	50.7965	105.132	45.584
HIT 2794	32.3446	35.7127	33.4777	33.7135	37.6442	38.1285	34.0539	33.0766	32.6973	33.1958	33.2832	34.4709	33.6255	33.0946	32.4231	35.8349	9364.37	60.1881	40.8935	41.1371	335.072	500.624	43.289	55.4987	956.824	36.086	38.1499	35.9207	2255.13	45.6831	118.317	37.9194
HIT 2795	32.2126	37.2987	34.0865	34.7141	37.0985	37.7991	33.6997	32.4171	33.0254	33.9224	33.9999	32.934	33.1054	33.3282	33.2549	35.8672	4399.34	45.1585	40.5759	38.1041	176.308	258.675	38.2382	43.3563	416.889	37.0922	38.3651	36.7143	1345.17	45.5364	90.6335	35.7925
HIT 2796	61.1636	57.9557	70.5107	101.571	45.6435	37.5199	641.201	275.299	84.1599	296.143	151.078	234.341	263.418	300.306	185.337	207.079	879.339	81.1462	107.491	249.698	152.855	151.097	121.442	55.8315	222.493	59.4261	47.8644	56.5258	453.728	69.9166	91.6085	61.6287
HIT 2797	39.2232	42.836	39.3799	56.1851	212.729	38.2935	33.9178	107.11	37.5945	88.8031	86.0143	37.4075	33.5593	53.582	34.8046	38.1848	3457.04	850.467	169.475	446.709	5001.4	466.416	84.9076	3241.67	414.929	632.59	79650.6	429.134	964.549	105.153	938.123	6368.05
HIT 2798	31.7665	36.4546	32.6301	33.9734	37.0706	39.7625	33.884	32.4617	33.0461	33.6005	33.4565	33.4884	33.3695	33.1964	33.2809	35.5829	43.6227	50.1887	39.2252	42.0657	40.5819	41.5813	45.0816	39.76	37.2761	36.8202	40.7255	36.6881	55.7674	41.194	52.0237	35.8091
HIT 2799	32.0639	37.0839	32.5929	33.542	38.97	36.9547	32.8417	32.7574	32.9723	34.1389	33.7211	33.2795	34.1075	33.7908	32.8614	35.7723	74.302	42.3386	41.939	45.8962	60.5836	42.7257	39.7878	66.166	39.0015	47.0757	116.467	37.4411	64.8853	41.913	56.4781	52.0808
HIT 280	58.0706	254.168	682.192	55.1401	2204.29	3395.16	57.0335	517.431	156.398	415.36	139.302	2564.35	701.043	58.6198	358.193	414.43	20553.2	13218.5	30232.6	397.175	48656.8	10648.2	46149.5	687.007	10635.1	23709.7	7958.52	337.745	94338.5	537.18	10725.6	10407.2
HIT 2800	31.9433	36.8513	33.2761	34.6088	36.7647	36.4552	34.4854	33.3061	32.4715	33.6001	34.6595	32.9963	33.8756	34.0643	33.3724	34.6582	49.833	57.503	50.9351	89.1563	213.451	44.536	41.5912	48.9198	56.3167	36.7636	39.94	36.3458	61.4419	43.1336	52.8575	72.7252
HIT 2801	32.6193	42.274	33.3983	34.0075	35.8954	36.4294	33.2271	31.8502	32.7849	35.0405	33.3635	34.0113	32.5194	34.0476	32.3864	35.546	47.7896	54.2989	40.0946	40.6522	44.3651	43.1073	53.7229	41.1307	38.0016	36.2876	37.1661	36.7173	54.7709	41.8818	51.6329	125.437
HIT 2802	32.1643	37.4068	33.1123	35.8264	44.8116	35.7595	35.1388	52.8922	33.6442	35.3931	34.6662	34.6333	34.3925	34.1974	35.0188	34.7881	270.945	53.4363	46.51	82.1642	147.743	45.9135	40.7435	190.068	51.7792	43.0838	60.5769	37.263	66.9308	47.0477	56.1322	73.709
HIT 2803	49.8077	46.9562	53.7014	49.7986	50.7051	41.9088	80.5834	554.203	203.875	536.786	210.063	72.6452	78.1377	599.482	206.918	42.9983	784.574	86.9269	114.339	200.202	48.1844	51.5318	48.9234	66.0566	46.0858	44.5064	2661.06	45.5665	81.5393	58.3136	175.65	48.0683
HIT 2804	31.9987	40.3968	32.9323	35.1916	45.6361	53.7353	34.1178	34.0365	34.9343	38.9356	35.9197	35.251	44.5999	35.3176	34.1421	70.5594	52.2761	44.8848	42.37	46.1121	60.4176	47.5914	56.0997	46.7543	76.0794	41.1643	45.4758	37.7828	118.318	42.9851	60.7099	37.6905
HIT 2805	34.9974	470.402	39.1788	45.4824	44.3602	46.3242	51.0308	59.0956	47.9665	66.0569	55.6439	53.2876	44.6864	59.5663	47.421	55.9777	6102.99	87.2834	575.306	1200.04	63.7261	66.3638	93.6876	1367.9	74.5032	59.2767	17646.4	94.5337	86.6685	59.1139	1255.95	55.0832
HIT 2806	33.1462	45.4109	34.3847	36.5741	39.2013	41.4225	35.5354	34.7877	37.8964	39.2973	37.2754	35.3319	34.6563	36.5679	35.4601	37.4204	440.795	337.087	74.7799	107.861	61.2548	44.5314	48.7579	167.179	43.4172	39.0586	1542.29	41.4851	63.1015	45.2839	117.171	41.1047
HIT 2807	31.8537	35.2345	32.5139	36.5185	37.9711	36.2562	33.7425	31.9913	33.1062	39.855	35.3688	34.034	33.4277	34.5137	33.879	36.434	80.1992	59.6225	44.5631	48.024	41.4706	37.7752	40.7394	46.6412	37.5118	36.8841	156.272	35.7203	57.6317	47.2333	57.8819	35.6082
HIT 2808	45.54	43.5072	33.9746	34.8332	42.9962	37.9823	34.4494	32.5704	32.7708	34.0194	34.0631	33.5198	33.1791	33.2812	33.4498	35.5871	2027.66	1447.03	201.09	379.656	118.14	44.887	68.5702	837.965	45.3935	38.7038	6298.66	44.981	63.2562	45.0429	398.642	43.8279
HIT 2809	32.0162	36.0349	33.14	33.8422	37.5538	37.5551	33.2775	32.6086	32.9136	34.159	33.867	33.7862	33.0911	33.1338	33.1758	35.8876	3181.87	5633.96	3970.14	1322.16	97.5663	6203.41	7666.63	22351.9	6521.88	12375.3	3936.09	16472.4	71.6699	197.361	1458.08	28539.6
HIT 281	31.9412	36.4626	32.928	33.4594	36.4511	37.8889	32.5917	32.9239	32.5866	32.7488	33.899	32.9542	32.7971	33.3223	32.7056	33.2876	43.6376	40.7767	40.0858	43.3362	39.1732	41.8915	41.3638	39.4212	37.0776	36.8606	40.3736	37.8865	57.9642	43.2244	50.6384	35.3364
HIT 2810	32.7383	40.4878	33.0735	34.6942	37.6351	37.4666	34.0996	33.5125	33.2682	33.6352	33.7818	33.5391	33.9068	34.0632	33.6811	36.006	2674.89	4270.2	2916.77	1268.87	85.1954	3654.91	5472.23	15087	4125.32	7855.3	2864.06	13123.2	89.7973	339.135	1876.18	19219.5
HIT 2811	32.3517	36.8948	32.9266	33.556	36.7467	37.6145	33.6017	33.5601	33.0521	35.6879	33.8212	34.3312	34.047	32.8607	34.0871	36.8209	179.432	196.519	161.118	248.571	41.1952	54.715	76.168	116.273	55.8078	96.4548	77.4475	3191.31	71.4123	540.271	237.386	246.47
HIT 2813	32.1471	36.178	32.6523	33.3709	37.7575	37.4353	33.7642	33.4717	32.2998	34.0254	33.3854	33.3347	34.2376	33.8733	33.494	35.3118	42.7254	44.706	41.4725	41.0033	44.1807	43.1367	43.1694	41.7057	38.0351	37.799	37.9378	36.9774	60.4396	42.0375	53.0609	36.025
HIT 2815	33.4109	37.7506	34.4884	35.4461	43.5891	38.6478	35.76	36.9712	9540.74	53.0251	36.198	36.5226	35.6956	37.2766	35.063	52.56	30852.3	26937.6	4485.51	1306.96	1145.37	4428.05	3519.76	2105.81	1729.23	8014.89	1127.73	5080.54	1145.91	1917	10222	18497.7
HIT 2816	32.0819	35.2907	32.6429	33.7481	39.1187	39.3741	33.4784	32.7436	33.3147	34.0561	33.6006	33.0278	32.7367	34.2383	33.872	35.0706	109.168	297.788	52.5697	42.5371	46.0877	41.954	44.6405	41.8084	37.2689	285.676	42.4159	39.4838	56.5733	42.6547	93.1834	39.2277
HIT 2817	32.2752	37.0787	32.5258	33.2962	37.9973	36.8134	32.8054	32.1091	33.0206	32.5879	33.7111	32.5966	33.1772	33.1243	32.6156	35.5407	194.271	1855.76	99.8241	40.7106	53.9361	119.791	42.7979	39.4527	46.3783	1239.81	44.6317	134.615	55.7093	53.9584	52.5402	430.567
[truncated: 2,364 more rows]

## Sheet: Table S4
Table S4. Relative counts of significant different genus-like bacterial groups of preterm and at term 2-year-old children (p<0.05)
[truncated: 67 more rows]
